# Supplementary material for: Water Reserves For The Environment: A Strategic And Temporal Analysis (2012-2022) For The Implementation Of Environmental Flows In Mexico
Source: Preprints.org preprint supplement (doi:10.20944/preprints202401.0453.v1), 2024-01-05
Supplement: Supplementary file 1 [file supplementary]

## Sheet: PWR_Nomenclature
	Column heading	Description
	Consecutive	Consecutive number
	ID_2022	Basin code assigned based on Hydrological Region plus number of management unit in water availability studies
	ID_2013	Basin code in 2013 database
	HR_code	Code of Hydrological Region
	HR_name	Name of Hydrological Region
	Basin_name	Basin name
	Mexican state	Federative entity
	SUR_KM2	Surface in square kilometers
	Reserve_zone	Name of the reserve zone
	EnvReserve_date	Date of environmental water reserve establishment
	VolEnvReserve	Water reserve established for the environment published on the Official Journal of the Federation in million cubic meters per year
	PUReserve_date	Establishment date of water reserve for public-urban use
	VolPUReserve	Water reserve established for public-urban use published on the Official Journal of the Federation in million cubic meters per year
	Revoke_date	Date of revoktion of the water reserve
	Wb	Ruoff within the basin in million cubic meters per year
	UpS	Upstream runoff in million cubic meters per year
	UCa	Consumptive use in million cubic meters per year
	UCb	Consumptive use, concessioned or in a concession's emission process in million cubic meters per year
	UCc	Water reserve for the environment in million cubic meters per year
	Tot_UC	Sum of consumptive uses, concessioned or in a concession's emission process, and environmental water reserve (UCa+UCb+UCc) in million cubic meters per year
	R	Returns in million cubic meters per year
	IM	Imports in million cubic meters per year
	EX	Exports in million cubic meters per year
	EV	Evaporation in million cubic meters per year
	FV_AV	Variation in reservoirs in million cubic meters per year
	AB	Surface water extraction in million cubic meters per year
	RXY	Downstream commitment in million cubic meters per year
	D	Mean annual availability in million cubic meters per year
	Avail_ind	Water availability indicator (0 = no water availability; 1 = water availability)
	Pressure_use	Water exploitation index, percentage relationship between the mean annual runoff and the volumes extracted for productive uses
	Wstress_ind	Water stress indicator (0 ≥ 10% exploitation, 1 < 10% exploitation)
	F_AV	Availability factor (0 ≤ 0 Hm3 and water stress ≥ 10% exploitation, 1 > 0 Hm3 and water stress < 10% exploitation)
	PRES_NPA	Presence of natural protected area
	FFPA	Surface of flora and fauna protection area category in square kilometers
	NRPA	Surface of natural resources protection area category in square kilometers
	NM	Surface of national monument category in square kilometers
	NP	Surface of national park category in square kilometers
	BR	Surface of biosphere reserve category in square kilometers
	SANT	Surface of sanctuary category in square kilometers
	SUR_NPA	Total surface of natural protected area
	F_NPA	Natural protected area factor (0 = there isn't any, 1 = one or more)
	PRES_RAMSAR	Presence of wetlands of international importance (Ramsar sites)
	SUR_RAMSAR	Total surface of Ramsar sites in square kilometers
	F_RAMSAR	Ramsar site factor (0 = there isn't any, 1 = one or more)
	PRES_GEPI	Presence of gaps and omissions of epicontinental aquatic conservation
	TOT_GEPI	Total gaps and omissions of epicontinental aquatic conservation
	EXTREME	Surface of extreme gaps and omissions category in square kilometers
	HIGH	Surface of high gaps and omissions category in square kilometers
	MEDIUM	Surface of medium gaps and omissions category in square kilometers
	SUR_GEPI	Total surface of gaps and omissions of epicontinental aquatic conservation
	F_GEPI	Gaps and omissions of epicontinental aquatic conservation factor (0 ≤ 33 gaps, 1 ≥ 34 gaps)
	F_CI	Conservation interest factor (0 = there isn't any, 1 = at least 1 of the conditions -natural protected area, Ramsar site, or ≥ 34 gaps, 2 = 2 of the conditions, 3 = all the conditions are met
	BAN	Presence or type of ban on water usage
	F_BANS	Ban factor (0 = there isn't any, 1 = there is any regardless of the type)
	PRES_ID	Presence of irrigation district
	IDS	Surface of irrigation district in square kilometers
	Ids/Bs	Irrigation district and basin surface relation in percentage
	F_ID	Irrigation districts factor (0 ≤ 1%, -0.25 = 1-10%, -0.50 >10%)
	PRES_DAM	Presence of dams
	NUMDAMS	Number of dams
	DCV	Cumulative dan capacity volume
	Dcv/Bmar	Cumulative dan capacity volume and basin mean annual runoff relation in percentage
	F_INF	Hydraulic infrastructure (dams) factor (0 = ≤ 1%, -0.25 = 1-10%, -0.50 > 10%)
	GEA_High	Aquifer surface with high groundwater extraction affectation risk and basin surface relationship in percentage
	GEA_Low	Aquifer surface with low groundwater extraction affectation risk and basin surface relationship in percentage
	GEA	Risk of affectation to the basin from groundwater extraction classification
	F_GA	Groundwater extraction affectation factor (0 = GEA_Low < 100% and GEA_High < 1%, -0.25 = GEA_High = 1-10%, -0.50 = GEA_High > 10%)
	LOC_2020	Total of localities
	POB2020	Inhabitants population in 2020
	DENP2020	Density population (inhabitants per square kilometer)
	F_dp	Population density factor (0 ≤ 25 inhab / km2, -0.25 = 26-50 inhab / km2, -0.50 > 50 inhab / km2)
	Weighted sum	Weighted sum of factors (FAV+FCI+FBANS+FID+FINF+FGA+FPD)
	Feasibility	Priority to conduct the environmental flow studies

## Sheet: Potential water reserves
Basic labeling								Reserves						Water availability																		Conservation interest
Consecutive	ID_2022	ID_2013	HR_code	HR_name	Basin_name	Mexican state	SUR_KM2	Reserve_zone	EnvReserve_date	VolEnvReserve	PUReserve_date	VolPUReserve	Revoke_date	Wb	UpS	UCa	UCb	UCc	TotUC	R	IM	EX	EV	FV_AV	AB	RXY	D	Avail_ind	Pressure_use	Wstress_ind	F_AV	PRES_NPA	FFPA	NRPA	NM	NP	BR	SANT	SUR_NPA	F_NPA	PRES_RAMSAR	SUR_RAMSAR	F_RAMSAR	PRES_GEPI	TOT_GEPI	EXTREME	HIGH	MEDIUM	SUR_GEPI
1	0101	1	1	Baja California Noroeste	Tijuana	Baja California	3262.72							83.014	17.359	209.194	0	0	209.194	0	126.144	0	5.826	-4.297	15.794	8.301	7.492	1	209.94	0	0	No							0	0	No	0	0	Yes	22	122.834	135.676	301.672	560.182
2	0102	4	1	Baja California Noroeste	Descanso-Los Médanos	Baja California	661.945							12.391	0	0.566	0	0	0.566	0	0	0	0	0	11.825	1.239	10.586	1	4.56783	1	1	No							0	0	No	0	0	Yes	3	36.5114	0	25.0003	61.5117
3	0103	7	1	Baja California Noroeste	Guadalupe	Baja California	2434.38							48.848	0	36.278	0	0	36.278	0	0	0	0	0	12.57	4.885	7.685	1	74.2671	0	0	Yes				39.0916			39.0916	1	Yes	5.17219	1	Yes	21	237.643	97.3913	222.173	557.207
4	0104	8	1	Baja California Noroeste	Ensenada-El Gallo	Baja California	752.479							15.078	0	2.275	0	0	2.275	0	0	0	0.488	0.028	12.287	1.508	10.779	1	18.5104	0	0	No							0	0	No	0	0	Yes	2	58.6594	0.347758	19.7655	78.7726
5	0105	11	1	Baja California Noroeste	San Carlos	Baja California	895.956							16.194	0	0.808	0	0	0.808	0	0	0	0	0	15.386	1.619	13.766	1	4.9895	1	1	No							0	0	Yes	2.89699	1	Yes	15	119.158	133.956	127.804	380.917
6	0106	14	1	Baja California Noroeste	Maneadero-Las Ánimas	Baja California	908.336							20.272	0	0.86	0	0	0.86	0	0	0	0	0	19.412	2.027	17.385	1	4.2423	1	1	No							0	0	Yes	15.3675	1	Yes	6	77.0818	0.137222	81.2408	158.46
7	0107	15	1	Baja California Noroeste	Santo Tomás	Baja California	790.392							15.991	0	0.36	0	0	0.36	0	0	0	0	0	15.631	1.599	14.032	1	2.25127	1	1	No							0	0	No	0	0	Yes	3	19.5479	0	47.3932	66.9412
8	0108	13	1	Baja California Noroeste	San Vicente	Baja California	2180.92							33.46	0	1.552	0.25	0	1.802	0	0	0	0	0	31.658	3.346	28.312	1	5.38553	1	1	No							0	0	No	0	0	Yes	23	165.322	232.922	175.037	573.28
9	0109	18	1	Baja California Noroeste	Los Cochis-El Salado	Baja California	1926.93							25.892	0	1.249	0	0	1.249	0	0	0	0	0	24.643	2.589	22.054	1	4.82388	1	1	Yes				1.67611			1.67611	1	No	0	0	Yes	9	15.9392	101.12	114.7	231.759
10	0110	21	1	Baja California Noroeste	San Rafael	Baja California	1356.13							13.704	0	0.439	0	0	0.439	0	0	0	0	0	13.265	1.37	11.895	1	3.20344	1	1	Yes				86.3289			86.3289	1	No	0	0	Yes	13	138.838	73.3945	94.9782	307.211
11	0111	26	1	Baja California Noroeste	San Telmo	Baja California	1377.67							10.744	0	4.313	0	0	4.313	0	0	0	0	0	6.431	1.074	5.356	1	40.1433	0	0	Yes				35.9127			35.9127	1	No	0	0	Yes	12	53.6103	2.79697	226.692	283.099
12	0112	29	1	Baja California Noroeste	Santo Domingo	Baja California	1267.83							9.48	0	3.853	0.043	0	3.896	0	0	0	0	0	5.584	0.948	4.636	1	41.097	0	0	Yes				553.246			553.246	1	No	0	0	Yes	18	132.588	71.6422	237.568	441.797
13	0113	35	1	Baja California Noroeste	San Quintín	Baja California	928.151							7.592	0	0.377	0	0	0.377	0	0	0	0	0	7.215	0.759	6.456	1	4.96575	1	1	No							0	0	Yes	72.6623	1	Yes	8	42.1258	6.23917	154.398	202.762
14	0114	38	1	Baja California Noroeste	San Simón	Baja California	1697.76							11.504	0	0.176	0	0	0.176	0	0	0	0	0	11.328	1.15	10.177	1	1.5299	1	1	Yes				32.9826			32.9826	1	Yes	25.2119	1	Yes	11	53.2425	50.0008	181.438	284.681
15	0115	42	1	Baja California Noroeste	El Socorro	Baja California	783.897							6.06	0	0.002	0	0	0.002	0	0	0	0	0	6.058	0.606	5.452	1	0.0330033	1	1	No							0	0	No	0	0	Yes	7	49.8476	0	105.799	155.647
16	0116	43	1	Baja California Noroeste	El Rosario	Baja California	2735.4							28.664	0	1.615	0	0	1.615	0	0	0	0	0	27.049	2.866	24.183	1	5.63425	1	1	Yes	0.0190087						0.0190087	1	No	0	0	Yes	31	229.55	174.308	366.406	770.264
17	0201	51	2	Baja California Centro Oeste	Santa Catarina	Baja California	2784.09							30.676	0	0.957	0	0	0.957	0	0	0	0	0	29.719	3.068	26.651	1	3.1197	1	1	Yes	2082.02						2082.02	1	No	0	0	Yes	11	75.0012	100.002	92.756	267.759
18	0202	56	2	Baja California Centro Oeste	La Bocana	Baja California	2591.47							18.661	0	0.018	0	0	0.018	0	0	0	0	0	18.643	1.866	16.777	1	0.0964579	1	1	Yes	2590.98						2590.98	1	No	0	0	Yes	9	100.002	50.0008	75.0012	225.004
19	0203	59	2	Baja California Centro Oeste	Jaraguay	Baja California	1074.28							5.233	0	0.043	0	0	0.043	0	0	0	0	0	5.19	0.523	4.666	1	0.821708	1	1	Yes	1074.16						1074.16	1	No	0	0	Yes	1	0	0	7.87291	7.87291
20	0204	60	2	Baja California Centro Oeste	San José	Baja California	841.202							4.949	0	0.009	0	0	0.009	0	0	0	0	0	4.94	0.495	4.445	1	0.181855	1	1	Yes	841.207						841.207	1	No	0	0	Yes	1	0	0	35.3395	35.3395
21	0205	62	2	Baja California Centro Oeste	Chapala	Baja California	920.266							6.291	0	0.002	0	0	0.002	0	0	0	0	0	6.289	0.629	5.66	1	0.0317914	1	1	Yes	920.084						920.084	1	No	0	0	Yes	7	25.0004	25.0004	102.996	152.996
22	0206	67	2	Baja California Centro Oeste	Boca del Carrizo	Baja California	1457.07							9.395	0	0.06	0	0	0.06	0	0	0	0	0	9.335	0.94	8.395	1	0.638638	1	1	Yes	1457.95						1457.95	1	No	0	0	Yes	10	102.268	40.7386	76.0857	219.092
23	0207	69	2	Baja California Centro Oeste	San Andrés	Baja California	2011.09							12.559	0	0	0	0	0	0	0	0	0	0	12.559	1.256	11.303	1	0	1	1	Yes	2011.24						2011.24	1	No	0	0	Yes	7	97.663	25.3095	51.0135	173.986
24	0208	80	2	Baja California Centro Oeste	Santo Dominguito	Baja California	391.128							3.266	0	0	0	0	0	0	0	0	0	0	3.266	0.327	2.939	1	0	1	1	Yes	391.541						391.541	1	No	0	0	Yes	0	6.77222	3.31258	0	10.0848
25	0209	79	2	Baja California Centro Oeste	Rosarito	Baja California	952.76							5.624	0	0.014	0	0	0.014	0	0	0	0	0	5.61	0.562	5.048	1	0.248933	1	1	Yes	952.824						952.824	1	No	0	0	Yes	2	40.9801	0	0	40.9801
26	0210	87	2	Baja California Centro Oeste	San Miguel	Baja California	606.265							3.683	0	0.09	0	0	0.09	0	0	0	0	0	3.593	0.368	3.225	1	2.44366	1	1	Yes	606.709						606.709	1	No	0	0	Yes	1	28.4255	0	0	28.4255
27	0211	90	2	Baja California Centro Oeste	Paraíso	Baja California	1519.61							6.29	0	0.024	0	0	0.024	0	0	0	0	0	6.266	0.629	5.637	1	0.381558	1	1	Yes	1519.77				0.805263		1520.58	1	No	0	0	Yes	12	197.822	43.5856	50.001	291.409
28	0212	96	2	Baja California Centro Oeste	San Luis	Baja California, Baja California Sur	3250.41							11.596	0	0	0	0	0	0	0	0	0	0	11.596	1.16	10.436	1	0	1	1	Yes	2103.5				1195.13		3298.63	1	Yes	251.207	1	Yes	12	221.047	25.7309	87.5945	334.372
29	0213	725	2	Baja California Centro Oeste	El Arco	Baja California, Baja California Sur	1434.46							5.482	0	0	0	0	0	0	0	0	0	0	5.482	0.548	4.934	1	0	1	1	Yes	462.634				983.249		1445.88	1	Yes	2.8369	1	Yes	15	77.3689	0	285.842	363.211
30	0214	94	2	Baja California Centro Oeste	Vizcaíno	Baja California, Baja California Sur	9116.01							31.762	0	0.083	0	0	0.083	0	0	0	0	0	31.679	3.176	28.503	1	0.261319	1	1	Yes	879.352				8290.18		9169.53	1	Yes	1432.65	1	Yes	52	448.564	472.494	367.66	1288.72
31	0215	106	2	Baja California Centro Oeste	Punta Eugenia	Baja California Sur	2911.14							4.891	0	0.02	0	0	0.02	0	0	0	0	0	4.871	0.489	4.382	1	0.408914	1	1	Yes					2916.27		2916.27	1	No	0	0	Yes	8	8.51865	98.3005	95.8222	202.641
32	0216	114	2	Baja California Centro Oeste	San Ignacio	Baja California Sur	12516.6							83.802	0	3.079	0.003	0	3.082	0	0	0	0	0	80.72	8.38	72.34	1	3.67772	1	1	Yes					5773.54		5773.54	1	Yes	4416.16	1	Yes	225	2353.16	2193.97	1024.63	5571.76
33	0301	134	3	Baja California Suroeste	La Purísima	Baja California Sur	3896.86							41.905	0	4.636	0.004	0	4.64	0	0	0	0	0	37.265	4.191	33.075	1	11.0727	0	0	No							0	0	Yes	2050.39	1	Yes	62	216.116	1051.95	290.927	1558.99
34	0302	148	3	Baja California Suroeste	Mezquital Seco	Baja California Sur	2013.06							24.637	0	0.015	0.007	0	0.022	0	0	0	0	0	24.615	2.464	22.151	1	0.0892966	1	1	Yes					0.0502565		0.0502565	1	Yes	1535.75	1	Yes	40	193.693	774.142	54.8882	1022.72
35	0303	155	3	Baja California Suroeste	Santo Domingo	Baja California Sur	4715.66							67.633	0	0.752	0.006	0	0.758	0	0	0	0	0	66.875	6.763	60.112	1	1.12075	1	1	No							0	0	Yes	914.042	1	Yes	22	103.951	31.6901	404.112	539.753
36	0304	170	3	Baja California Suroeste	Bramonas	Baja California Sur	7245.11							91.183	0	0.424	0.006	0	0.43	0	0	0	0	0	90.753	9.118	81.635	1	0.471579	1	1	Yes					0.0108817		0.0108817	1	Yes	6.64945	1	Yes	20	214.714	131.178	138.716	484.608
37	0305	184	3	Baja California Suroeste	Santa Rita	Baja California Sur	2161.31							33.022	0	0.889	0.01	0	0.899	0	0	0	0	0	32.123	3.302	28.821	1	2.72243	1	1	Yes					0.151284		0.151284	1	Yes	506.978	1	Yes	28	134.146	121.377	357.18	612.702
38	0306	189	3	Baja California Suroeste	Las Pocitas-San Hilario	Baja California Sur	2361.18							38.036	0	0.512	0.004	0	0.516	0	0	0	0	0	37.52	3.804	33.717	1	1.35661	1	1	No							0	0	Yes	1204.53	1	Yes	31	200.005	285.448	353.061	838.514
39	0307	209	3	Baja California Suroeste	Conejos-Los Viejos	Baja California Sur	1784.67							19.733	0	0.033	0	0	0.033	0	0	0	0	0	19.7	1.973	17.727	1	0.167233	1	1	No							0	0	No	0	0	Yes	11	0	0	244.885	244.885
40	0308	228	3	Baja California Suroeste	Melitón Albañez	Baja California Sur	1612.23							20.95	0	0.024	0	0	0.024	0	0	0	0	0	20.926	2.095	18.831	1	0.114558	1	1	Yes					1.25974		1.25974	1	No	0	0	Yes	19	167.006	147.828	145.871	460.705
41	0309	246	3	Baja California Suroeste	La Matanza	Baja California Sur	426.796							6.981	0	0.73	0.013	0	0.743	0	0	0	0	0	6.238	0.698	5.54	1	10.6432	0	0	Yes					285.967		285.967	1	No	0	0	Yes	16	122.596	241.471	32.6145	396.682
42	0310	257	3	Baja California Suroeste	Cañada Honda	Baja California Sur	40.3306							0.724	0	0.003	0	0	0.003	0	0	0	0	0	0.721	0.072	0.649	1	0.414365	1	1	No							0	0	No	0	0	Yes	1	10.6472	0	6.02417	16.6714
43	0311	256	3	Baja California Suroeste	Todos Santos	Baja California Sur	161.427							3.227	0	5.605	0	0	5.605	0	0	0	0	0	-2.378	0.323	-2.701	0	173.691	0	0	Yes					19.1593		19.1593	1	No	0	0	Yes	5	1.17143	14.8267	91.7323	107.73
44	0312	255	3	Baja California Suroeste	Pescaderos	Baja California Sur	374.042							8.318	0	0.559	1.14	0	1.698	0	0	0	0	0	6.62	0.832	5.788	1	20.4256	0	0	Yes					179.885		179.885	1	Yes	1.43137	1	Yes	8	45.6359	103.496	63.9301	213.062
45	0313	265	3	Baja California Suroeste	Plutarco E. Calles	Baja California Sur	471.005							11.647	0	1.971	0.018	0	1.988	0	0	0	0	0	9.659	1.165	8.494	1	17.0774	0	0	No							0	0	Yes	2.09803	1	Yes	13	37.3709	87.4601	214.197	339.028
46	0314	274	3	Baja California Suroeste	Migriño	Baja California Sur	289.659							7.948	0	0.003	0.003	0	0.006	0	0	0	0	0	7.942	0.795	7.147	1	0.0754907	1	1	No							0	0	Yes	0.755778	1	Yes	2	0	2.01225	55.5387	57.5509
47	0315	243	3	Baja California Suroeste	El Carrizal	Baja California Sur	247.963							4.385	0	0.004	0	0	0.004	0	0	0	0	0	4.381	0.439	3.943	1	0.0912201	1	1	Yes					0.210646		0.210646	1	No	0	0	Yes	5	105.017	38.1599	16.7268	159.903
48	0401	5	4	Baja California Noreste	Cerrada Laguna Salada	Baja California	6228.47							65.25	0	0.267	0	0	0.267	0	0	0	0	0	64.983	6.525	58.458	1	0.409195	1	1	Yes				11.601	10.21		21.811	1	Yes	794.273	1	Yes	66	710.109	446.181	468.605	1624.89
49	0402	16	4	Baja California Noreste	El Borrego	Baja California	2899.53							19.344	0	0	0	0	0	0	0	0	0	0	19.344	1.934	17.41	1	0	1	1	Yes					1297.47		1297.47	1	Yes	864.45	1	Yes	31	646.803	100.216	31.5424	778.561
50	0403	20	4	Baja California Noreste	Cerrada Santa Clara	Baja California	1454.61							16.961	0	0.012	0	0	0.012	0	0	0	0	0	16.949	1.696	15.253	1	0.0707505	1	1	Yes				18.984			18.984	1	No	0	0	Yes	0	7.64164	0	4.91515	12.5568
51	0404	27	4	Baja California Noreste	Bahía San Felipe	Baja California	782.101							3.808	0	0	0	0	0	0	0	0	0	0	3.808	0.381	3.427	1	0	1	1	Yes					29.8794		29.8794	1	No	0	0	Yes	4	0	35.7683	52.1758	87.9441
52	0405	31	4	Baja California Noreste	Huatamote	Baja California	1855.8							11.594	0	0.03	0	0	0.03	0	0	0	0	0	11.564	1.159	10.404	1	0.258755	1	1	Yes				4.42394			4.42394	1	No	0	0	Yes	5	0	0	150.175	150.175
53	0406	39	4	Baja California Noreste	San Fermín	Baja California	1158.95							4.997	0	0	0	0	0	0	0	0	0	0	4.997	0.5	4.497	1	0	1	1	No							0	0	No	0	0	Yes	4	14.7558	0	78.3536	93.1094
54	0407	47	4	Baja California Noreste	Agua Dulce	Baja California	1420.1							8.827	0	0	0	0	0	0	0	0	0	0	8.827	0.883	7.944	1	0	1	1	Yes	209.406						209.406	1	No	0	0	Yes	6	60.0869	75.6959	32.0745	167.857
55	0408	2	4	Baja California Noreste	Agua Grande	Baja California	732.046							9.101	0	0	0	0	0	0	0	0	0	0	9.101	0.91	8.191	1	0	1	1	No							0	0	No	0	0	Yes	17	307.016	54.3239	56.886	418.226
56	0501	53	5	Baja California Centro Este	La Palma	Baja California	1131.17							6.335	0	0.001	0	0	0.001	0	0	0	0	0	6.334	0.634	5.701	1	0.0157853	1	1	Yes	1128.47						1128.47	1	No	0	0	Yes	6	125.002	0	46.9329	171.935
57	0502	58	5	Baja California Centro Este	Calamajue	Baja California	1037.96							6.208	0	0	0	0	0	0	0	0	0	0	6.208	0.621	5.587	1	0	1	1	Yes	1035.79						1035.79	1	No	0	0	Yes	2	0	0	54.7666	54.7666
58	0503	61	5	Baja California Centro Este	Asamblea	Baja California	1414.68							7.791	0	0.003	0	0	0.003	0	0	0	0	0	7.788	0.779	7.009	1	0.038506	1	1	Yes	1409.45				4.80066		1414.25	1	Yes	3.30274	1	Yes	0	0	2.59332	0	2.59332
59	0504	72	5	Baja California Centro Este	Tepetate	Baja California	1181.09							5.822	0	0.043	0	0	0.043	0	0	0	0	0	5.779	0.582	5.197	1	0.738578	1	1	Yes	1175.94				5.88971		1181.83	1	Yes	5.72094	1	Yes	1	0	0.635992	15.4288	16.0648
60	0505	77	5	Baja California Centro Este	San Pedro	Baja California	1212.69							5.104	0	0.244	0	0	0.244	0	0	0	0	0	4.86	0.51	4.349	1	4.78056	1	1	Yes	1205.03				8.75859		1213.79	1	Yes	7.25408	1	Yes	3	25.0005	25.0005	19.4014	69.4023
61	0506	83	5	Baja California Centro Este	El Alambrado	Baja California	849.531							5.12	0	0	0	0	0	0	0	0	0	0	5.12	0.512	4.608	1	0	1	1	Yes	785.092				8.15157		793.244	1	Yes	4.50897	1	Yes	1	0	0	30.5337	30.5337
62	0507	95	5	Baja California Centro Este	El Infiernito	Baja California	1017.15							7.221	0	0	0	0	0	0	0	0	0	0	7.221	0.722	6.499	1	0	1	1	Yes	271.444				0.21582		271.66	1	No	0	0	Yes	6	166.641	0	0	166.641
63	0508	129	5	Baja California Centro Este	Mulegé	Baja California Sur	758.895							8.678	0	0.121	0	0	0.121	0	0	0	0	0	8.557	0.868	7.689	1	1.39433	1	1	No							0	0	Yes	5.46982	1	Yes	2	38.5366	11.6956	6.06848	56.3006
64	0509	125	5	Baja California Centro Este	San Marcos-Palo Verde	Baja California Sur	999.403							14.87	0	0.77	0.005	0	0.775	0	0	0	0	0	14.095	1.487	12.608	1	5.21184	1	1	No							0	0	Yes	15.9227	1	Yes	9	192.784	1.08172	26.4805	220.346
65	0510	124	5	Baja California Centro Este	San Bruno	Baja California Sur	140.6							1.162	0	0	0	0	0	0	0	0	0	0	1.162	0.116	1.046	1	0	1	1	No							0	0	No	0	0	Yes	1	13.658	0	5.82271	19.4808
66	0511	121	5	Baja California Centro Este	San Lucas	Baja California Sur	164.236							1.14	0	0	0.003	0	0.003	0	0	0	0	0	1.137	0.114	1.023	1	0.263158	1	1	Yes					0.639045		0.639045	1	No	0	0	Yes	1	47.4527	0	0	47.4527
67	0512	119	5	Baja California Centro Este	Santa Agueda	Baja California Sur	429.478							4.663	0	0.635	0	0	0.635	0	0	0	0	0	4.028	0.466	3.562	1	13.6178	0	0	Yes					64.199		64.199	1	No	0	0	Yes	3	72.7152	0	0	72.7152
68	0513	118	5	Baja California Centro Este	Santa Rosalía	Baja California Sur	149.19							1.009	0	0	0	0	0	0	0	0	0	0	1.009	0.101	0.908	1	0	1	1	Yes					82.3718		82.3718	1	No	0	0	Yes	3	41.3617	0	14.2105	55.5722
69	0514	111	5	Baja California Centro Este	Las Vírgenes	Baja California Sur	1462.79							16.552	0	0.03	0	0	0.03	0	0	0	0	0	16.522	1.655	14.866	1	0.181247	1	1	Yes					1408.56		1408.56	1	No	0	0	Yes	6	30.6284	86.2172	53.1394	169.985
70	0515	105	5	Baja California Centro Este	Paralelo 28	Baja California, Baja California Sur	871.984							11.701	0	0.009	0	0	0.009	0	0	0	0	0	11.692	1.17	10.522	1	0.0769165	1	1	Yes					847.573		847.573	1	No	0	0	Yes	2	10.7282	13.785	25.0005	49.5137
71	0601	280	6	Baja California Sureste	San Lucas	Baja California Sur	271.046							5.262	0	0.031	0.002	0	0.033	0	0	0	0	0	5.229	0.526	4.702	1	0.627138	1	1	Yes	2.01615						2.01615	1	Yes	1.95457	1	Yes	4	20.2253	1.04414	100.617	121.887
72	0602	261	6	Baja California Sureste	San José del Cabo	Baja California Sur	1582.56							42.428	0	3.982	0.04	0	4.022	0	0	0	0	0	38.406	4.243	34.163	1	9.47959	1	1	Yes					127.342		127.342	1	Yes	1203.33	1	Yes	45	324.976	558.996	203.847	1087.82
73	0603	253	6	Baja California Sureste	Cabo Pulmo	Baja California Sur	531.309							9.492	0	0.015	0	0	0.015	0	0	0	0	0	9.477	0.949	8.527	1	0.158028	1	1	Yes				1.78561			1.78561	1	Yes	0.872072	1	Yes	7	25.0007	20.7076	115.843	161.552
74	0604	249	6	Baja California Sureste	Santiago	Baja California Sur	1102.14							23.367	0	1.91	0	0	1.91	0	0	0	0	0	21.457	2.337	19.121	1	8.17392	1	1	Yes					372.661		372.661	1	Yes	12.1428	1	Yes	17	72.0227	86.7663	240.045	398.835
75	0605	232	6	Baja California Sureste	San Bartolo	Baja California Sur	671.08							11.52	0	0.744	0	0	0.744	0	0	0	0	0	10.776	1.152	9.624	1	6.45833	1	1	Yes					109.713		109.713	1	No	0	0	Yes	13	173.94	119.459	42.7556	336.155
76	0606	222	6	Baja California Sureste	Los Planes	Baja California Sur	1068.46							17.118	0	0.307	0.021	0	0.328	0	0	0	0	0	16.79	1.712	15.079	1	1.91611	1	1	Yes					16.6585		16.6585	1	No	0	0	Yes	16	14.9291	137.158	244.898	396.985
77	0607	223	6	Baja California Sureste	La Paz	Baja California Sur	1409.19							24.534	0	6.782	0.005	0	6.787	0	0	0	0	0	17.747	2.453	15.294	1	27.6637	0	0	No							0	0	Yes	18.674	1	Yes	13	32.4613	12.9556	289.759	335.176
78	0608	215	6	Baja California Sureste	El Coyote	Baja California Sur	273.21							3.875	0	0.624	0.043	0	0.667	0	0	0	0	0	3.208	0.388	2.82	1	17.2129	0	0	Yes	12.8341						12.8341	1	Yes	8.83383	1	Yes	3	0	4.66589	56.4811	61.147
79	0609	182	6	Baja California Sureste	Alfredo B. Bonfil	Baja California Sur	1210.07							16.995	0	0.07	0	0	0.07	0	0	0	0	0	16.925	1.7	15.226	1	0.411886	1	1	No							0	0	Yes	38.5138	1	Yes	3	30.8128	0	55.5877	86.4005
80	0610	163	6	Baja California Sureste	Tepentú	Baja California Sur	530.143							8.1	0	0.033	0	0	0.033	0	0	0	0	0	8.067	0.81	7.257	1	0.407407	1	1	Yes				0.00631693			0.00631693	1	Yes	6.43795	1	Yes	1	22.2111	0	9.43369	31.6448
81	0611	151	6	Baja California Sureste	Loreto	Baja California Sur	583.655							9.501	0	0.145	0	0	0.145	0	0	0	0	0	9.356	0.95	8.406	1	1.52616	1	1	Yes				1.08569			1.08569	1	Yes	378.453	1	Yes	13	122.938	47.3735	149.28	319.591
82	0612	142	6	Baja California Sureste	San Juan B. Londó	Baja California Sur	684.243							8.837	0	0.026	0	0	0.026	0	0	0	0	0	8.811	0.884	7.927	1	0.294217	1	1	No							0	0	Yes	39.1278	1	Yes	2	0	2.12408	36.7387	38.8628
83	0613	137	6	Baja California Sureste	Rosarito	Baja California Sur	520.694							5.506	0	0.003	0	0	0.003	0	0	0	0	0	5.503	0.551	4.952	1	0.054486	1	1	No							0	0	Yes	37.1713	1	Yes	2	0	0	50.0012	50.0012
84	0614	130	6	Baja California Sureste	Bahía Concepción	Baja California Sur	1115.25							11.512	0	0.077	0	0	0.077	0	0	0	0	0	11.435	1.151	10.283	1	0.668867	1	1	No							0	0	Yes	1.39624	1	Yes	2	38.2451	0	23.3286	61.5737
85	0701	3	7	Río Colorado	Río Colorado	Baja California, Sonora	6239.6							19.985	1850.23	1729.06	0	0	1729.06	349.472	0	490.304	0	0	0.325	0	0.325	1	118.669	0	0	Yes					1382.63		1382.63	1	Yes	1947.54	1	Yes	100	1424.35	420.642	595.542	2440.53
86	0702	727	7	Río Colorado	Río Santa Cruz	Sonora	909.788							18.958	0	0.049	0	0	0.049	0	0	0	0	0	18.909	1.896	17.013	1	0.258466	1	1	No							0	0	Yes	6.10898	1	Yes	13	45.4643	100.001	165.722	311.188
87	0703	28	7	Río Colorado	Río San Pedro	Sonora	1786.06							35.944	0	0.079	1.349	0	1.428	0	0	0	0	0	34.516	3.594	30.921	1	3.97285	1	1	Yes	0.654436						0.654436	1	Yes	1771.28	1	Yes	37	104.432	194.586	583.754	882.772
997	0704	726	7	Río Colorado	Arroyo Los Nogales	Sonora	114.004							2.487	0	0	0	0	0	0	0	0	0	0	2.487	0.249	2.238	1	0	1	1	No							0	0	No	0	0	No					0
89	0801	17	8	Sonora Norte	Río Sonoyta 1	Sonora	4496.41							12.953	0	0.372	0	0	0.372	0	0	0	0	0	12.582	12.582	0	0	2.87192	1	0	Yes					1816.34		1816.34	1	Yes	23.4673	1	Yes	22	49.7781	45.4826	469.473	564.734
90	0802	12	8	Sonora Norte	Río Sonoyta 2	Sonora	3153.6							16.55	12.582	0.188	0	0	0.188	0	0	28.943	0	0	0	0	0	0	99.9966	0	0	No							0	0	No	0	0	Yes	31	0	98.5847	690.776	789.36
91	0803	30	8	Sonora Norte	Arroyo Cocóspera	Sonora	2847.69							43.287	0	2.986	0	0	2.986	0	0	0	0	0	40.301	40.301	0	0	6.89814	1	0	No							0	0	Yes	4.70983	1	Yes	44	150.002	225.003	728.145	1103.15
92	0804	24	8	Sonora Norte	Río Magdalena	Sonora	13530.2							49.145	40.301	36.957	0	0	36.957	0	0	26.681	6.106	-0.464	20.166	20.166	0	0	77.4546	0	0	No							0	0	No	0	0	Yes	202	768.358	1049.5	3225.37	5043.23
93	0805	19	8	Sonora Norte	Río Concepción	Sonora	14649.2							37.444	20.166	24.255	0	0	24.255	0	0	33.355	0	0	0	0	0	0	100	0	0	Yes	0.956761						0.956761	1	Yes	118.839	1	Yes	87	325.609	321.713	1484.44	2131.76
94	0806	6	8	Sonora Norte	Valle de San Luis	Sonora	5238.48							11.372	0	0	0	0	0	0	0	11.372	0	0	0	0	0	0	100	0	0	Yes					2555.78		2555.78	1	Yes	12.3055	1	Yes	21	0	0.112161	529.412	529.524
95	0807	9	8	Sonora Norte	Los Vidrios 1	Sonora	3841.62							7.633	0	0	0	0	0	0	0	7.633	0	0	0	0	0	0	100	0	0	Yes					3830.42		3830.42	1	Yes	338.288	1	Yes	33	0	24.937	789.874	814.811
999	0808	10	8	Sonora Norte	Los Vidrios 2	Sonora	255.116							2.129	0	0	0	0	0	0	0	2.129	0	0	0	0	0	0	100	0	0	Yes					241.135		241.135	1	No	0	0	No					0
97	0809	45	8	Sonora Norte	Arivaipa - Puerto Libertad	Sonora	7979.34							30.803	0	0.004	0	0	0.004	0	0	30.799	0	0	0	0	0	0	100	0	0	Yes	0.152198						0.152198	1	Yes	17.4379	1	Yes	41	81.3169	52.9221	868.147	1002.39
98	0901	40	9	Sonora Sur	Río Sonora 1	Sonora	11483.2							127.614	0	37.298	0	0	37.298	0	0	0	0	0	90.316	90.317	0	0	29.2272	0	0	Yes	116.641						116.641	1	Yes	16.0206	1	Yes	184	325.005	821.356	3538.65	4685.01
99	0902	46	9	Sonora Sur	Río San Miguel	Sonora	3815.35							33.38	0	5.613	0	0	5.613	0	0	0	0	0	27.767	27.767	0	0	16.8155	0	0	No							0	0	No	0	0	Yes	56	0	149.182	1244.63	1393.81
100	0903	52	9	Sonora Sur	Río Sonora 2	Sonora	5942.18							75.358	118.084	74.694	0	0	74.694	0	60.485	85.171	30.099	-0.21	64.173	64.173	0	0	98.0935	0	0	No							0	0	No	0	0	Yes	53	26.7241	36.3521	1263.98	1327.05
101	0904	728	9	Sonora Sur	Río Sonora 3	Sonora	17659.1							98.872	64.173	163.045	0	0	163.045	0	0	0	0	0	-0.001	0	-0.001	0	100	0	0	Yes	1.30821						1.30821	1	Yes	38.4238	1	Yes	149	335.076	210.296	3191.55	3736.92
110	0905	74	9	Sonora Sur	Río Mátape 1	Sonora	3136.96							33.244	0	2.438	0	0	2.438	0	0	0	4.18	-0.005	26.631	11.862	14.769	1	19.8923	0	0	No							0	0	No	0	0	Yes	34	25.0005	193.488	594.16	812.648
111	0906	86	9	Sonora Sur	Río Mátape 2	Sonora	5914.65							46.638	26.631	20.133	0.003	0	20.136	0	0	12.5	0	0	40.633	0	40.633	1	44.5427	0	0	Yes	0.537377						0.537377	1	Yes	64.0341	1	Yes	29	82.7571	17.3862	643.461	743.604
102	0907	33	9	Sonora Sur	Río Bavispe	Chihuahua, Sonora	14564							526.976	0	457.555	0	0	457.555	3.774	0	0	53.245	-0.572	20.522	20.518	0.004	1	96.8219	0	0	Yes	1725.22				307.576		2032.79	1	Yes	41.7238	1	Yes	140	1024.22	896.773	1613.38	3534.37
103	0908	49	9	Sonora Sur	Río Yaqui 1	Chihuahua, Sonora	39928.8							2187.84	20.522	1970.89	7.277	0	1978.17	447.212	0	60.485	132.847	40.147	443.922	443.406	0.516	1	100.149	0	0	Yes	7022.47						7022.47	1	No	0	0	Yes	353	888.641	2778.02	5094.45	8761.11
104	0909	81	9	Sonora Sur	Río Yaqui 2	Chihuahua, Sonora	11744.9							382.623	443.922	1604.22	0	0	1604.22	1876.6	0	0	203.562	1.203	894.16	891.018	3.142	1	218.861	0	0	No							0	0	No	0	0	Yes	69	300.004	236.677	1205.86	1742.54
105	0910	112	9	Sonora Sur	Río Yaqui 3	Sonora	6276.41							54.119	894.16	2289.89	250	0	2539.89	1600.57	0	0	0	0	8.957	0	8.957	1	267.842	0	0	Yes	12.8351						12.8351	1	Yes	1047.55	1	Yes	96	900.065	289.12	1198.16	2387.35
113	0911	117	9	Sonora Sur	Arroyo Cocoraque 2	Sonora	1033.42							13.529	11.25	1.662	0	0	1.662	0	0	0	0	0	23.117	0	23.117	1	6.70729	1	1	No							0	0	No	0	0	Yes	4	25.1924	18.09	50.0011	93.2836
993	0911	113	9	Sonora Sur	Arroyo Cocoraque 1	Sonora	1183.87							15.443	0	4.193	0	0	4.193	0	0	0	0	0	11.25	0.755	10.495	1	27.1515	0	0	No							0	0	No	0	0	No					0
106	0913	101	9	Sonora Sur	Río Mayo 1	Chihuahua, Sonora	7658.26							965.053	0	3.256	25.024	0	28.279	2.024	0	0	0	0	938.798	938.748	0.05	1	2.93041	1	1	Yes	516.12			57.7565			573.876	1	Yes	0.0485483	1	Yes	16	50.001	73.316	295.486	418.803
107	0914	109	9	Sonora Sur	Arroyo Quiriego	Sonora	1074.87							23.496	0	0.402	0	0	0.402	0.089	0	0	0	0	23.183	23.181	0.001	1	1.71093	1	1	No							0	0	No	0	0	Yes	1	0	0	25.0005	25.0005
108	0915	116	9	Sonora Sur	Río Mayo 2	Sonora	2238.01							146.372	961.981	1034.77	0	0	1034.77	0.229	0	0	73.009	0.373	0.425	0.367	0.059	1	99.9822	0	0	Yes	46.8634						46.8634	1	No	0	0	Yes	7	60.4488	35.7136	98.016	194.178
109	0916	120	9	Sonora Sur	Río Mayo 3	Sonora	4634.02							68.966	0.425	864.488	0	0	864.488	1036.67	0	88.8	0	0	152.774	0	152.774	1	1373.79	0	0	Yes	32.8331						32.8331	1	Yes	67.7227	1	Yes	26	170.982	32.6014	451.909	655.493
114	1001	212	10	Sinaloa	Río Habitas	Sinaloa, Durango	1815.82							372.025	0	0.648	0	0	0.648	0.248	0	0	32.383	8.6	330.641	237.858	92.784	1	11.1904	0	0	No							0	0	No	0	0	Yes	37	127.431	203.881	577.391	908.703
115	1002	233	10	Sinaloa	Río Elota	Sinaloa	508.008							95.084	330.641	213.317	33.04	0	246.357	0	0	59.903	0	0	119.466	0	119.466	1	71.9385	0	0	Yes						0.107059	0.107059	1	Yes	0.307396	1	Yes	11	44.5342	51.411	175.559	271.504
116	1003	247	10	Sinaloa	Río Quelite 1	Sinaloa	814.748							101.296	0	0.353	0	0	0.353	0	0	0	0	0	100.942	0.342	100.601	1	0.348484	1	1	No							0	0	No	0	0	Yes	6	9.41201	0.556611	138.79	148.759
117	1004	262	10	Sinaloa	Río Quelite 2	Sinaloa	376.024							50.77	100.942	0.514	0	0	0.514	0	0	0	0	0	151.198	0	151.198	1	0.3388	1	1	Yes	11.4732					0.446599	11.9198	1	Yes	59.2043	1	Yes	1	15.5218	0	6.35845	21.8803
118	1005	165	10	Sinaloa	Río Mocorito 1	Sinaloa	1606.14							148.459	0	3.476	0	0	3.476	0.106	0	0	28.102	-3.222	120.209	116.512	3.697	1	19.1002	0	0	No							0	0	No	0	0	Yes	7	0	36.0434	135.677	171.721
119	1006	173	10	Sinaloa	Río Mocorito 2	Sinaloa	851.528							73.852	120.209	405.973	0	0	405.973	2.479	314.945	89.782	0	0	15.73	0	15.73	1	255.463	0	0	No							0	0	Yes	9.72698	1	Yes	6	25.5761	13.9578	120.72	160.254
120	1007	188	10	Sinaloa	Río San Lorenzo 1	Durango, Sinaloa	8312.92							1374.9	0	1028.09	0.012	0	1028.11	0	0	0	60.703	23.263	262.83	212.527	50.303	1	80.8837	0	0	No							0	0	No	0	0	Yes	164	558.873	1496.83	2031.22	4086.92
121	1008	204	10	Sinaloa	Río San Lorenzo 2	Sinaloa	1669.59							245.207	262.83	714.295	0.049	0	714.343	1022.87	0	523.565	0	0	293	0	293	1	243.665	0	0	No							0	0	No	0	0	Yes	10	148.393	16.954	96.435	261.782
122	1009	162	10	Sinaloa	Río Humaya	Sinaloa, Durango, Chihuahua	10899.1							1869.36	0	1284.65	0.153	0	1284.8	0.001	0	351.551	106.579	25.99	100.446	91.169	9.276	1	94.6268	0	0	No							0	0	No	0	0	Yes	130	100.656	281.732	2917.61	3300
123	1010	180	10	Sinaloa	Río Tamazula	Sinaloa, Durango	3275.24							758.53	0	530.409	0	0	530.409	0	0	0	40.589	5.958	181.574	164.806	16.768	1	76.0624	0	0	No							0	0	No	0	0	Yes	26	25.0007	81.6481	536.115	642.764
124	1011	185	10	Sinaloa	Río Culiacán	Sinaloa	2596.83							444.475	282.02	2111.39	5.16	0	2116.55	1850.19	309.419	503.022	0	0	266.532	0	266.532	1	360.577	0	0	Yes	0.236018						0.236018	1	Yes	33.3782	1	Yes	15	46	73.7	267.969	387.669
125	1012	107	10	Sinaloa	Río Fuerte 1	Sonora, Chihuahua, Sinaloa, Durango	26033.1	Río Fuerte	25 de Septiembre de 2016	781.3	25 de Septiembre de 2016	33.24		4024.36	0	3725.68	2.081	31.202	3758.97	1.425	0	0	49.428	121.499	95.898	94.493	1.404	1	96.8772	0	0	Yes	145.694						145.694	1	Yes	2.86913	1	Yes	310	391.291	1301.47	6010.16	7702.92
126	1013	135	10	Sinaloa	Río Choix	Chihuahua, Sinaloa	1487.26	Río Fuerte	25 de Septiembre de 2016	102.3				279.238	0	0.768	0	0	0.768	0.474	0	0	0	0	278.943	274.858	4.085	1	0.275034	1	1	No							0	0	No	0	0	Yes	11	0	25.3228	248.973	274.295
127	1014	128	10	Sinaloa	Arroyo Alamos	Sonora, Chihuahua, Sinaloa	1777.68	Río Fuerte	25 de Septiembre de 2016	23.4				94.124	0	0.239	0	0	0.239	0	0	0	0	0	93.885	92.51	1.375	1	0.25392	1	1	Yes	599.753						599.753	1	Yes	1.6259	1	Yes	23	39.544	120.626	414.365	574.535
128	1015	132	10	Sinaloa	Río Fuerte 2	Sinaloa, Sonora, Chihuahua	5430.2	Río Fuerte	25 de Septiembre de 2016	113.8				595.043	468.726	6577.58	0	0	6577.58	6822.23	0	839.27	200.244	39.611	229.294	113.8	115.494	1	719.771	0	0	Yes	150.995						150.995	1	Yes	1.38897	1	Yes	43	246.148	339.143	482.915	1068.21
129	1016	216	10	Sinaloa	Río Piaxtla 1	Durango, Sinaloa	4853.9							996.843	0	2.54	0	0	2.54	0	0	0	0	0	994.304	6.482	987.822	1	0.254804	1	1	No							0	0	No	0	0	Yes	106	257.345	1028.99	1416.07	2702.4
130	1017	242	10	Sinaloa	Río Piaxtla 2	Sinaloa	2591.09							421.95	994.304	9.192	0.042	0	9.233	0.148	0	0	0	0	1407.17	0	1407.17	1	0.652002	1	1	Yes	486.999					0.412706	487.412	1	Yes	2.63856	1	Yes	44	116.114	458.698	495.128	1069.94
131	1018	141	10	Sinaloa	Río Sinaloa 1	Sinaloa, Chihuahua, Durango	7366.63							1311.35	0	1058.43	0	0	1058.43	0.001	0	0	58.211	26.644	168.068	135.346	32.723	1	87.1836	0	0	Yes	90.4203						90.4203	1	No	0	0	Yes	103	100.002	524.278	1949.3	2573.58
994	1019	140	10	Sinaloa	Arroyo Ocoroni	Sinaloa	1419.64							151.147	0	0.144	0	0	0.144	0	0	0	17.432	1.229	132.342	106.575	25.767	1	12.4415	0	0	No							0	0	No	0	0	No					0
133	1020	154	10	Sinaloa	Arroyo Cabrera	Sinaloa	627.016							83.401	0	1.307	0	0	1.307	0	0	0	0	0	82.094	66.11	15.984	1	1.56713	1	1	No							0	0	No	0	0	Yes	6	0	0	102.381	102.381
134	1021	153	10	Sinaloa	Río Sinaloa 2	Sinaloa	3738.79							462.184	382.504	1203.39	2.121	0	1205.51	1055.95	0	325.074	0	0	370.051	0	370.051	1	181.201	0	0	Yes	0.167783						0.167783	1	Yes	0.0386543	1	Yes	18	17.519	25.9903	428.344	471.853
995	1022	177	10	Sinaloa	Río Pericos 1	Sinaloa	497.644							49.725	0	0.481	0	0	0.481	0	0	0	0	0	49.244	0.855	48.389	1	0.96732	1	1	No							0	0	No	0	0	No					0
136	1023	178	10	Sinaloa	Río Pericos 2	Sinaloa	1308.37							144.088	49.244	3.367	0	0	3.367	0.692	0	0	0	0	190.658	0	190.658	1	1.74156	1	1	Yes	0.355166						0.355166	1	Yes	109.057	1	Yes	13	149.703	52.034	110.065	311.803
137	1024	133	10	Sinaloa	Grupo de Corrientes Agiabampo	Sonora, Sinaloa	3882.11							89.084	0	22.045	0	0	22.045	1.275	0	0	0	0	68.314	0	68.314	1	24.7463	0	0	Yes	32.5166						32.5166	1	Yes	885.279	1	Yes	17	127.57	90.0064	279.954	497.531
138	1025	158	10	Sinaloa	Grupo de Corrientes Tpopolobampo	Sinaloa	3191.35							73.484	0	13.015	2.19	0	15.205	5.588	0	0	0	0	63.867	0	63.867	1	20.6916	0	0	Yes	37.5277						37.5277	1	Yes	585.626	1	Yes	23	166.148	151.589	270.099	587.836
139	1026	164	10	Sinaloa	Grupo de Corrientes Huyaqui	Sinaloa	1327.65							53.771	0	8.505	0	0	8.505	0	0	0	0	0	45.266	0	45.266	1	15.8171	0	0	No							0	0	Yes	71.1932	1	Yes	10	71.2768	25.0006	148.802	245.08
140	1027	181	10	Sinaloa	Grupo de Corrientes Reforma	Sinaloa	862.977							37.219	0	2.097	0	0	2.097	1.374	0	0	0	0	36.496	0	36.496	1	5.63422	1	1	No							0	0	Yes	151.28	1	Yes	7	99.5168	8.69051	72.1895	180.397
141	1028	201	10	Sinaloa	Grupo de Corrientes Pabellones	Sinaloa	1739.41							116.014	0	11.654	0	0	11.654	0.364	0	0	0	0	104.725	0	104.725	1	10.0453	1	1	No							0	0	Yes	103.498	1	Yes	14	101.714	114.761	109.304	325.779
142	1029	221	10	Sinaloa	Grupo de Corrientes Tempehuaya	Sinaloa	1740.4							104.504	0	5.566	0.241	0	5.807	1.001	0	0	0	0	99.698	0	99.698	1	5.55673	1	1	Yes	0.248577					0.0100159	0.258593	1	Yes	8.72077	1	Yes	11	6.13148	40.818	240.715	287.664
143	1030	729	10	Sinaloa	Grupo de Corrientes Altata	Sinaloa	309.979							22.677	0	0.488	0	0	0.488	0.002	0	0	0	0	22.19	0	22.19	1	2.15196	1	1	Yes	0.0435699						0.0435699	1	No	0	0	Yes	2	0	0	70.6185	70.6185
144	1101	298	11	Presidio-San Pedro	Río Cañas 1	Nayarit, Sinaloa	434.913							123.131	0	3.047	0	0	3.047	0	0	0	0	0	120.084	1.297	118.787	1	2.4746	1	1	No							0	0	Yes	105.015	1	Yes	7	20.5234	92.2149	45.6477	158.386
145	1102	307	11	Presidio-San Pedro	Río Cañas 2	Nayarit, Sinaloa	188.754							58.474	120.084	1.872	0.057	0	1.929	0.006	0	0	0	0	176.636	0	176.636	1	1.08032	1	1	No							0	0	Yes	0.779285	1	Yes	3	17.6035	0	81.9124	99.5159
146	1103	186	11	Presidio-San Pedro	Laguna de Santiaguillo	Durango	2454.82	San Pedro Mezquital	9 de Septiembre de 2014	0.32				142.178	0	13.199	0.036	0	13.235	2.756	0	0	84.415	0	47.284	0.32	46.964	1	68.6815	0	0	No							0	0	Yes	225.104	1	Yes	27	379.158	32.4739	297.122	708.755
147	1104	211	11	Presidio-San Pedro	La Tapona	Durango	2761.87	San Pedro Mezquital	9 de Septiembre de 2014	13.29				139.912	0	2.545	0	0	2.545	0.678	0	0	0	0	138.046	13.29	124.756	1	1.819	1	1	No							0	0	No	0	0	Yes	20	434.101	34.785	91.2362	560.123
148	1105	206	11	Presidio-San Pedro	Río La Sauceda	Durango	2488.76	San Pedro Mezquital	9 de Septiembre de 2014	16.34				141.962	0	22.816	0	0	22.816	4.576	0	0	33.96	2.584	87.178	85.113	2.065	1	41.814	0	0	No							0	0	Yes	9.65027	1	Yes	22	244.886	25.0007	258.793	528.68
149	1106	225	11	Presidio-San Pedro	Río El Tunal	Durango	1818.94	San Pedro Mezquital	9 de Septiembre de 2014	32.97	9 de Septiembre de 2014	52.27		138.578	0	1.021	0	52.27	53.291	0.842	0	0	7.315	1.139	77.675	75.835	1.84	1	6.8373	1	1	Yes		39.3553					39.3553	1	No	0	0	Yes	12	0	13.496	299.469	312.965
150	1107	239	11	Presidio-San Pedro	Río Santiago Bayacora	Durango	1080.82	San Pedro Mezquital	9 de Septiembre de 2014	8.22	9 de Septiembre de 2014	26.38		90.856	0	23.83	0	26.38	50.21	4.782	0	0	7.327	1.338	36.763	35.892	0.871	1	35.7654	0	0	Yes		696.232					696.232	1	No	0	0	Yes	6	108.193	6.00795	39.574	153.775
151	1108	224	11	Presidio-San Pedro	Río Durango	Durango	2149.41	San Pedro Mezquital	9 de Septiembre de 2014	34.67				112.771	201.617	91.804	0.044	0	91.848	28.52	0	0	0	0	251.06	242.937	8.123	1	29.2149	0	0	Yes		135.664					135.664	1	No	0	0	Yes	43	875.419	126.076	94.413	1095.91
152	1109	234	11	Presidio-San Pedro	Río Poanas	Durango, Zacatecas	1495.02	San Pedro Mezquital	9 de Septiembre de 2014	14.65				64.35	0	35.488	0.001	0	35.49	7.1	0	0	5.762	1.52	28.679	27.751	0.928	1	66.4662	0	0	Yes				9.10073			9.10073	1	No	0	0	Yes	9	0	17.6401	188.212	205.852
153	1110	258	11	Presidio-San Pedro	Río Suchil	Zacatecas, Durango	1800.71	San Pedro Mezquital	9 de Septiembre de 2014	1.82				36.667	0	15.057	0.031	0	15.088	3.102	0	0	0	0	24.681	23.883	0.799	1	41.1487	0	0	Yes		45.3921					45.3921	1	No	0	0	Yes	9	28.4923	6.97675	215.526	250.995
154	1111	251	11	Presidio-San Pedro	Río Graseros	Zacatecas, Durango	598.966	San Pedro Mezquital	9 de Septiembre de 2014	2.49				15.534	0	0.133	0	0	0.133	0.024	0	0	0	0	15.425	14.926	0.499	1	0.856186	1	1	Yes		17.9208			172.62		190.541	1	No	0	0	Yes	3	46.0552	0	37.3103	83.3655
155	1112	236	11	Presidio-San Pedro	Río San Pedro-Mezquital	Nayarit, Durango, Zacatecas	11629.1	San Pedro Mezquital	9 de Septiembre de 2014	354.74	9 de Septiembre de 2014	50		2245.05	319.845	1979.9	0	49.926	2029.82	5.566	0	0	0	0	540.642	457.477	83.165	1	77.192	0	0	Yes		5794.23		2.0298	92.3039		5888.57	1	No	0	0	Yes	213	746.511	1821.58	2775.6	5343.69
156	1113	338	11	Presidio-San Pedro	Río San Pedro-Desembocadura	Nayarit	808.179	San Pedro Mezquital	9 de Septiembre de 2014	2296.66				269.663	540.642	59.495	0	0	59.495	1974.18	0	0	0	0	2724.99	2296.66	428.326	1	7.3423	1	1	Yes					172.763		172.763	1	Yes	298.486	1	Yes	19	165.087	140.2	191.855	497.142
157	1114	252	11	Presidio-San Pedro	Río Baluarte 1	Sinaloa, Nayarit, Durango	4621.48							1671.09	0	7.958	0.566	0	8.524	0.681	0	0	0	0	1663.24	25.556	1637.69	1	0.510087	1	1	No							0	0	No	0	0	Yes	120	600.017	1037.55	1422.05	3059.61
158	1115	287	11	Presidio-San Pedro	Río Baluarte 2	Sinaloa	495.473							186.915	1663.24	28.428	0	0	28.428	0.001	0	0	0	0	1821.73	0	1821.73	1	1.53652	1	1	Yes	0.711613						0.711613	1	Yes	144.329	1	Yes	18	25.5968	188.113	205.16	418.87
159	1116	230	11	Presidio-San Pedro	Río Presidio 1	Sinaloa, Durango	5326.1		30 de Abril de 2008					1004.13	0	3.717	0	0	3.717	0	0	327.7	0	0	672.714	271.156	401.558	1	33.0054	0	0	No							0	0	No	0	0	Yes	110	502.527	746.071	1449.71	2698.31
160	1117	266	11	Presidio-San Pedro	Río Presidio 2	Sinaloa	500.599		30 de Abril de 2008					73.926	672.714	92.343	327.7	0	420.043	0	327.7	0	0	0	654.298	13	641.298	1	56.2578	0	0	No							0	0	Yes	11.5827	1	Yes	4	1.71128	0	120.948	122.66
161	1118	245	11	Presidio-San Pedro	Río Acaponeta 1	Nayarit, Durango, Sinaloa	5091.73							1357.01	0	3.246	0.032	0	3.278	1.158	0	0	0	0	1354.89	3.283	1351.61	1	0.24156	1	1	Yes		10.9859					10.9859	1	No	0	0	Yes	114	466.524	1215.99	1253.57	2936.09
162	1119	311	11	Presidio-San Pedro	Río Acaponeta 2	Nayarit	249.942							78.24	1354.89	2.219	1.259	0	3.478	2.181	0	0	0	0	1431.83	0	1431.83	1	0.242686	1	1	Yes					9.85249		9.85249	1	Yes	51.1644	1	Yes	9	66.3257	43.0028	93.673	203.001
163	1120	318	11	Presidio-San Pedro	Río Rosa Morada 1	Nayarit	228.865							80.087	0	0.437	0.001	0	0.437	0.106	0	0	0	0	79.756	4.049	75.707	1	0.546905	1	1	No							0	0	No	0	0	Yes	9	25.0008	78.7069	98.1626	201.87
164	1121	327	11	Presidio-San Pedro	Río Rosa Morada 2	Nayarit	195.724							66.5	79.756	7.666	0	0	7.666	4.728	0	0	0	0	143.318	0	143.318	1	5.24149	1	1	Yes					0.078804		0.078804	1	Yes	3.60855	1	Yes	5	21.463	14.2457	80.6745	116.383
165	1122	319	11	Presidio-San Pedro	Río Bejuco 1	Nayarit	339.003							147.972	0	0.795	0	0	0.795	0.175	0	0	0	0	147.352	6.089	141.263	1	0.537264	1	1	Yes		91.6835					91.6835	1	No	0	0	Yes	10	25.0008	130.854	99.3879	255.243
166	1123	331	11	Presidio-San Pedro	Río Bejuco 2	Nayarit	132.875							51.402	147.352	8.567	0	0	8.567	8.567	0	0	0	0	198.754	0	198.754	1	4.31035	1	1	No							0	0	No	0	0	Yes	4	1.86911	57.7333	52.4367	112.039
167	1124	272	11	Presidio-San Pedro	Grupo de Corrientes Mazatlan	Sinaloa	293.121							21.501	0	0.006	0	0	0.006	0.005	0	0	0	0	21.499	0	21.499	1	0.0279057	1	1	No							0	0	Yes	0.581852	1	Yes	2	43.0385	0	13.3039	56.3423
168	1125	284	11	Presidio-San Pedro	Grupo de Corrientes Huizache	Sinaloa	652.159							52.968	0	0.084	0	0	0.084	0.014	0	0	0	0	52.897	0	52.897	1	0.158586	1	1	No							0	0	Yes	265.46	1	Yes	10	132.05	99.1532	38.7101	269.913
169	1126	326	11	Presidio-San Pedro	Grupo de Corrientes Marismas Nacionales	Sinaloa, Nayarit	3592.5							554.476	0	295.489	4.569	0	300.058	0.059	0	0	0	0	254.477	0	254.477	1	54.1156	0	0	Yes					1009.26		1009.26	1	Yes	2210.54	1	Yes	96	1273.24	455.476	616.358	2345.08
170	1201	481	12	Lerma-Santiago	Río Lerma 1	Estado de México, Ciudad de México	2058.31							228.529	0	94.439	0.502	0	94.941	65.656	44.371	0	12.157	-0.575	232.033	232.033	0	0	46.6125	0	0	Yes	229.816			15.7649			245.581	1	Yes	30.0986	1	Yes	53	383.092	697.785	224.891	1305.77
171	1202	484	12	Lerma-Santiago	Río La Gavia	Estado de México	492.977							104.118	0	31.535	0.584	0	32.119	4.056	0	0	12.774	0.004	63.277	63.277	0	0	43.1213	0	0	Yes	37.36	0.762539					38.1225	1	No	0	0	Yes	15	103.623	243.983	32.6665	380.272
172	1203	470	12	Lerma-Santiago	Río Jaltepec	Michoacán de Ocampo, Estado de México	362.945							92.501	0	32.756	1.056	0	33.812	5.322	0	0	14.351	0.904	48.756	48.756	0	0	53.0448	0	0	Yes					11.9846		11.9846	1	No	0	0	Yes	5	0	15.4282	113.55	128.978
173	1204	448	12	Lerma-Santiago	Río Lerma 2	Estado de México, Querétaro de Arteaga, Michoacán de Ocampo, Guanajuato,	2677.41							386.84	344.067	594.461	0.612	0	595.074	16.712	0	0	74.511	2.486	75.548	75.549	-0.001	0	91.9501	0	0	Yes					8.67456		8.67456	1	No	0	0	Yes	28	215.269	178.176	346.485	739.931
174	1205	437	12	Lerma-Santiago	Río Lerma 3	Guanajuato, Querétaro de Arteaga, Michoacán de Ocampo, Estado de México	2877.87							475.613	75.548	950.637	0.567	0	951.204	501.441	0	0	91.506	6.517	3.376	3.384	-0.008	0	190.367	0	0	Yes				0.254988	79.5257		79.7807	1	No	0	0	Yes	20	0	48.9041	471.24	520.144
179	1206	419	12	Lerma-Santiago	Río Lerma 4	Guanajuato, Michoacán de Ocampo	2609.45							102.836	119.542	436.864	0.005	0	436.869	761.593	118.255	587.908	6.417	0	71.032	73.485	-2.453	0	463.712	0	0	No							0	0	Yes	0.00682581	1	Yes	61	206.163	631.691	653.371	1491.23
175	1207	365	12	Lerma-Santiago	Río La Laja 1	Guanajuato, Querétaro de Arteaga, San Luis Potosí	6934.2							251.617	0	108.503	0.6	0	109.103	16.127	0	0	52.416	1.973	104.252	104.357	-0.105	0	64.9765	0	0	Yes					9.46552		9.46552	1	No	0	0	Yes	15	95.097	40.0414	261.129	396.267
176	1208	398	12	Lerma-Santiago	Río Querétaro	Querétaro de Arteaga, Guanajuato, Michoacán de Ocampo	2486.49							105.229	0	121.643	0.004	0	121.647	66.068	0	0	12.111	0	37.539	37.577	-0.038	0	127.111	0	0	Yes				25.1927			25.1927	1	No	0	0	Yes	3	22.7664	0	50.0017	72.7681
177	1209	401	12	Lerma-Santiago	Río La Laja 2	Guanajuato, Querétaro de Arteaga, Michoacán de Ocampo	2570.8							77.311	141.791	138.535	0.306	0	138.841	38.409	0	0	2.504	0	116.166	116.424	-0.259	0	64.511	0	0	No							0	0	No	0	0	Yes	8	0	0	192.616	192.616
178	1210	435	12	Lerma-Santiago	Laguna de Yuriria	Michoacán de Ocampo, Guanajuato	1119.45							188.609	0	4.533	0	0	4.533	1.278	96.698	118.255	169.965	-3.65	-2.518	0	-2.518	0	153.282	0	0	No							0	0	Yes	150.03	1	Yes	37	614.529	164.786	147.622	926.937
180	1211	377	12	Lerma-Santiago	Río Turbio	Jalisco, Guanajuato	2811.66							183.395	0	187.34	0	0	187.34	115.779	0	0	19.408	0	92.426	95.618	-3.192	0	112.734	0	0	No							0	0	Yes	38.9091	1	Yes	64	96.6991	437.582	1041.01	1575.29
181	1212	450	12	Lerma-Santiago	Río Angulo	Guanajuato, Michoacán de Ocampo	2069.22							352.204	0	276.352	0	0	276.352	213.908	0	0	36.8	0.526	252.433	261.151	-8.718	0	89.0615	0	0	No							0	0	Yes	1.20725	1	Yes	58	941.162	390.136	150.172	1481.47
182	1213	374	12	Lerma-Santiago	Río Lerma 5	Guanajuato, Michoacán de Ocampo, Jalisco	7545.97							279.948	415.891	680.984	1.63	0	682.614	117.801	491.21	0	27.5	0	594.736	639.799	-45.062	0	102.051	0	0	No							0	0	Yes	0.0799793	1	Yes	126	183.2	804.678	2146.8	3134.68
183	1214	423	12	Lerma-Santiago	Río Lerma 6	Michoacán de Ocampo, Jalisco, Guanajuato	2046.6							307.195	594.736	295.745	0	0	295.745	29.763	0	92.39	27.107	0	516.452	587.045	-70.593	0	46.0392	0	0	No							0	0	No	0	0	Yes	37	172.685	223.101	565.974	961.76
185	1215	400	12	Lerma-Santiago	Río Zula	Jalisco	1982.24							209.175	0	80.041	0	0	80.041	9.499	0	0	10.982	0	127.651	145.1	-17.448	0	43.5152	0	0	No							0	0	No	0	0	Yes	29	93.912	299.35	351.455	744.717
184	1216	742	12	Lerma-Santiago	Río Duero	Michoacán de Ocampo	2066.1							504.67	0	490.115	0	0	490.115	266.176	0	0	6.295	0	274.435	311.948	-37.512	0	98.3633	0	0	Yes				0.0538166			0.0538166	1	No	0	0	Yes	43	379.034	273.2	378.01	1030.24
186	1217	409	12	Lerma-Santiago	Río Lerma 7	Jalisco, Michoacán de Ocampo	5292.94							787.314	918.539	445.781	0	0	445.781	35.629	92.39	325.71	1391.73	-78.679	-250.669	0	-250.669	0	122.199	0	0	No							0	0	Yes	1125.77	1	Yes	133	1232.26	927.966	1188.03	3348.25
187	1218	473	12	Lerma-Santiago	Lago de Pátzcuaro	Michoacán de Ocampo	919.067							69.58	0	27.496	0	0	27.496	2.924	0	0	105.93	0	-60.922	0	-60.922	0	191.759	0	0	No							0	0	Yes	7.02206	1	Yes	29	623.117	40.9667	45.4285	709.512
188	1219	451	12	Lerma-Santiago	Lago de Cuitzeo	Michoacán de Ocampo, Guanajuato	3847.61							488.54	0	177.702	0.013	0	177.715	98.922	0	0	443.293	-2.017	-31.529	0	-31.529	0	126.702	0	0	Yes				22.6476			22.6476	1	Yes	0.56434	1	Yes	126	2691.28	256.875	188.168	3136.32
189	1220	304	12	Lerma-Santiago	Río San Pedro	Aguascalientes, Zacatecas	2675.3	Santiago	6 de Junio de 2018	33.18	6 de Junio de 2018	3.75		85.521	69.973	75.154	0.061	3.75	78.965	7.655	0	14.165	0	0	70.019	70.013	0.006	1	57.4813	0	0	Yes		485.343					485.343	1	No	0	0	Yes	14	52.4532	126.963	202.148	381.565
190	1221	324	12	Lerma-Santiago	Presa Calles	Aguascalientes, Zacatecas	592.288	Santiago	6 de Junio de 2018	0.8				78.137	0	4.096	0.048	0	4.144	0.604	127.695	113.53	14.063	4.726	69.973	69.97	0.003	1	174.646	0	0	Yes		421.17					421.17	1	No	0	0	Yes	7	0	48.5045	118.646	167.151
191	1222	313	12	Lerma-Santiago	Presa El Niágara	Aguascalientes, Zacatecas, Jalisco	2342.92	Santiago	6 de Junio de 2018	41.59	6 de Junio de 2018	115.414		41.302	70.019	57.942	0.404	115.41	173.755	7.219	113.53	0	7.197	0.114	51.003	50.983	0.02	1	58.9799	0	0	Yes		56.2291					56.2291	1	No	0	0	Yes	15	97.0804	29.6191	272.041	398.74
192	1223	346	12	Lerma-Santiago	Presa El Cuarenta	Jalisco, Guanajuato, Zacatecas, San Luis Potosí	2308.77	Santiago	6 de Junio de 2018	1	6 de Junio de 2018	0.358		61.996	0	25.766	0.942	0.358	27.065	2.795	0	0	2.586	-0.176	35.316	35.305	0.011	1	46.9675	0	0	No							0	0	No	0	0	Yes	18	128.322	51.3592	266.776	446.457
193	1224	358	12	Lerma-Santiago	Río de Lagos	Jalisco, Guanajuato	2741.54	Santiago	6 de Junio de 2018	2.33	6 de Junio de 2018	2.678		131.679	35.316	47.208	2.917	2.678	52.804	5.202	0	0	9.728	0	109.665	109.609	0.056	1	35.8412	0	0	No							0	0	No	0	0	Yes	45	120.933	383.077	647.597	1151.61
194	1225	349	12	Lerma-Santiago	Presa Ajojucar	Aguascalientes, Jalisco	794.444	Santiago	6 de Junio de 2018	17.64	6 de Junio de 2018	0.044		57.144	51.003	14.274	0.641	0.044	14.959	1.559	0	0	2.315	0	92.432	92.39	0.043	1	15.932	0	0	Yes		0.604232					0.604232	1	Yes	0.343796	1	Yes	6	0	20.089	146.045	166.134
195	1226	361	12	Lerma-Santiago	Río Grande	Jalisco	577.255	Santiago	6 de Junio de 2018	4.06	6 de Junio de 2018	0.386		21.569	0	1.529	0.614	0.386	2.529	0.229	0	0	1.615	0	17.654	17.646	0.008	1	17.4232	0	0	No							0	0	No	0	0	Yes	5	0	0	120.187	120.187
196	1227	342	12	Lerma-Santiago	Río Encarnación	Aguascalientes, Jalisco	2652.23	Santiago	6 de Junio de 2018	14.65	6 de Junio de 2018	2.931		100.647	0	27.494	2.476	2.931	32.901	3.097	0	0	12.405	0	58.438	58.411	0.027	1	42.1026	0	0	No							0	0	No	0	0	Yes	26	181.192	154	388.451	723.643
197	1228	356	12	Lerma-Santiago	Río Aguascalientes	Zacatecas, Aguascalientes, Jalisco	660.788	Santiago	6 de Junio de 2018	79.75	6 de Junio de 2018	0.025		32.833	168.525	15.396	0.734	0.025	16.155	2.317	0	0	3.199	0	184.321	184.227	0.094	1	9.59932	1	1	No							0	0	No	0	0	Yes	11	0	23.174	228.658	251.832
198	1229	380	12	Lerma-Santiago	Río San Miguel	Jalisco	1105.29	Santiago	6 de Junio de 2018	12.02	6 de Junio de 2018	0.569		74.036	0	4.093	1.176	0.569	5.837	0.673	0	0	2.268	0	66.604	66.57	0.034	1	10.1802	1	1	No							0	0	No	0	0	Yes	20	20.582	220.936	262.703	504.221
199	1230	392	12	Lerma-Santiago	Río del Valle	Jalisco	763.084	Santiago	6 de Junio de 2018	6.75	6 de Junio de 2018	1.849		60.704	0	12.359	0.812	27.524	40.694	9.148	0	0	10.989	0	18.169	18.16	0.009	1	39.7997	0	0	No							0	0	No	0	0	Yes	18	17.1068	112.843	304.948	434.898
200	1231	357	12	Lerma-Santiago	Río Verde 1	Zacatecas, Jalisco	2128.68	Santiago	6 de Junio de 2018	209.44	6 de Junio de 2018	0.889		164.452	378.758	26.383	1.395	0.889	28.667	3.342	0	119.837	3.752	0	394.297	394.018	0.279	1	27.8653	0	0	No							0	0	No	0	0	Yes	53	50.0016	591.269	640.26	1281.53
201	1232	390	12	Lerma-Santiago	Río Verde 2	Jalisco	1378.15	Santiago	6 de Junio de 2018	307.25	6 de Junio de 2018	2.262		187.33	394.297	201.06	1.466	159.042	361.568	5.977	0	0	4.573	0	221.463	221.047	0.415	1	35.6068	0	0	No							0	0	No	0	0	Yes	24	7.89406	176.012	423.468	607.374
202	1233	310	12	Lerma-Santiago	Río Palomas	Zacatecas	343.725	Santiago	6 de Junio de 2018	1.3	6 de Junio de 2018	0.04		29.112	0	0.655	0	0.04	0.695	0.066	0	0	1.544	0	26.939	26.937	0.002	1	7.55359	1	1	Yes		141.625					141.625	1	No	0	0	Yes	5	0	13.7481	137.88	151.628
203	1234	302	12	Lerma-Santiago	Presa El Chique	Aguascalientes, Jalisco, Zacatecas	2369.31	Santiago	6 de Junio de 2018	9.46	6 de Junio de 2018	0.927		95.452	26.939	48.327	0.388	0.927	49.642	5	0	0	11.481	-0.167	66.435	66.423	0.011	1	49.0469	0	0	Yes		333.295					333.295	1	No	0	0	Yes	21	50.0016	42.5532	424.032	516.586
204	1235	328	12	Lerma-Santiago	Río Juchipila 1	Aguascalientes, Zacatecas, Jalisco	3113.03	Santiago	6 de Junio de 2018	23.13				149.129	66.435	87.636	1.021	0	88.657	9.135	0	113.53	6.499	-0.08	16.093	16.055	0.038	1	96.7722	0	0	Yes		629.174					629.174	1	No	0	0	Yes	12	0	24.7638	236.435	261.199
205	1236	360	12	Lerma-Santiago	Río Juchipila 2	Zacatecas, Jalisco	2563.92	Santiago	6 de Junio de 2018	45.81	6 de Junio de 2018	0.046		186.365	16.093	20.353	1.995	0.046	22.393	3.428	0	0	0.937	0	182.555	182.072	0.483	1	11.5012	0	0	Yes		876.583					876.583	1	No	0	0	Yes	26	75.0025	141.652	462.446	679.1
206	1237	403	12	Lerma-Santiago	Río Santiago 1	Jalisco	2945.41	Santiago	6 de Junio de 2018	209.65	6 de Junio de 2018	14.036		474.193	0	1877.52	0	14.036	1891.56	1746.32	168.396	0	38.927	0.308	458.116	457.257	0.859	1	404.215	0	0	Yes	40.9003						40.9003	1	No	0	0	Yes	50	40.2627	339.073	853.313	1232.65
207	1238	391	12	Lerma-Santiago	Río Santiago 2	Jalisco	1450.65	Santiago	6 de Junio de 2018	591.85	6 de Junio de 2018	70.743		385.853	679.579	384.996	0	70.743	455.739	357.012	157.314	0	3.996	0	1120.02	1117.06	2.964	1	36.5103	0	0	Yes	18.5694	23.0257					41.5951	1	No	0	0	Yes	27	87.5749	327.728	278.686	693.99
208	1239	367	12	Lerma-Santiago	Presa Santa Rosa	Jalisco, Zacatecas	1939.86	Santiago	6 de Junio de 2018	1123.91	6 de Junio de 2018	2.585		446.638	1302.58	1574.16	2.456	2.585	1579.2	1560.92	0	0	15.53	6.319	1709.09	1700.33	8.759	1	91.3819	0	0	Yes	21.0164	19.724					40.7404	1	No	0	0	Yes	34	171.157	170.54	535.966	877.663
209	1240	373	12	Lerma-Santiago	Río Santiago 3	Jalisco, Zacatecas, Nayarit	1852.04	Santiago	6 de Junio de 2018	1061.53	6 de Junio de 2018	3.743		401.491	1709.09	3.966	0	3.743	7.709	1.323	0	0	0.341	0	2103.85	2093.03	10.823	1	0.204067	1	1	Yes		348.544					348.544	1	No	0	0	Yes	23	72.6998	251.693	274.117	598.51
210	1241	294	12	Lerma-Santiago	Río Tepetongo	Jalisco, Zacatecas	3057.6	Santiago	6 de Junio de 2018	5.76	6 de Junio de 2018	3.661		84.203	0	42.044	0.438	3.661	46.143	4.388	0	0	10.438	0.461	31.549	31.392	0.157	1	63.3956	0	0	Yes		14.9102					14.9102	1	No	0	0	Yes	41	25.0008	231.653	747.14	1003.79
211	1242	334	12	Lerma-Santiago	Río Tlaltenango	Zacatecas, Jalisco	2550.23	Santiago	6 de Junio de 2018	32.18	6 de Junio de 2018	0.213		242.191	0	75.184	0.1	0.213	75.497	8.263	0	0	7.96	1.258	165.739	164.912	0.826	1	34.8906	0	0	Yes		493.343					493.343	1	No	0	0	Yes	25	0	197.968	430.211	628.179
212	1243	289	12	Lerma-Santiago	Arroyo Lobatos	Zacatecas	1780.66	Santiago	6 de Junio de 2018	3.72				65.279	0	6.981	0.551	0	7.532	0.902	0	0	1.015	0.001	57.633	57.346	0.287	1	13.0946	0	0	Yes		472.075					472.075	1	No	0	0	Yes	25	0	58.0789	573.536	631.615
213	1244	299	12	Lerma-Santiago	Río Bolaños 1	Zacatecas, Jalisco	4434.14	Santiago	6 de Junio de 2018	71.44	6 de Junio de 2018	0.6		392.703	254.922	13.192	0	0.6	13.792	2.043	0	0	1.932	0	633.944	630.704	3.239	1	2.3353	1	1	Yes		627.049					627.049	1	No	0	0	Yes	74	312.109	763.413	782.383	1857.9
214	1245	341	12	Lerma-Santiago	Río Bolaños 2	Jalisco, Zacatecas, Nayarit	2939.32	Santiago	6 de Junio de 2018	134.69	6 de Junio de 2018	0.678		285.894	633.944	4.488	0	0.678	5.166	1.29	0	0	0.989	0	914.973	910.266	4.707	1	0.595431	1	1	Yes		961.174					961.174	1	No	0	0	Yes	24	20.4073	238.701	350.142	609.25
215	1246	269	12	Lerma-Santiago	Río San Juan	Zacatecas, Jalisco, Durango	5650.15	Santiago	6 de Junio de 2018	5.76	6 de Junio de 2018	0.151		406.664	0	51.723	52.701	0.151	104.575	75.871	0	0	1.7	0	376.26	362.081	14.179	1	26.0962	0	0	Yes		2798.68			81.4293		2880.11	1	No	0	0	Yes	142	972.497	1595.68	980.926	3549.1
216	1247	306	12	Lerma-Santiago	Río Atengo	Zacatecas, Jalisco, Durango, Nayarit	6146.73	Santiago	6 de Junio de 2018	276.6	6 de Junio de 2018	3.801		762.675	376.26	3.037	0.008	3.797	6.842	1.096	0	0	0.645	0	1132.54	1089.58	42.96	1	0.323987	1	1	Yes		1673.33					1673.33	1	No	0	0	Yes	112	252.856	1416.57	1032.62	2702.04
217	1248	292	12	Lerma-Santiago	Río Jesús María	Nayarit, Durango, Zacatecas	3086.89	Santiago	6 de Junio de 2018	107.97	6 de Junio de 2018	0.114		370.41	0	0.748	0	0.113	0.861	0.561	0	0	0	0	370.11	356.153	13.957	1	0.201938	1	1	Yes		131.974					131.974	1	No	0	0	Yes	62	315.805	707.229	541.304	1564.34
218	1249	308	12	Lerma-Santiago	Río Huaynamota	Nayarit, Jalisco	2036.12	Santiago	6 de Junio de 2018	200.99	6 de Junio de 2018	2.927		242.99	370.11	0.722	0	2.877	3.598	0.541	0	0	0	0	610.043	586.902	23.141	1	0.117762	1	1	Yes		22.9498					22.9498	1	No	0	0	Yes	43	127.638	452.288	479.087	1059.01
219	1250	348	12	Lerma-Santiago	Río Santiago 4	Nayarit, Jalisco	2239.78	Santiago	6 de Junio de 2018	1933.28	6 de Junio de 2018	0.794		351.153	3018.82	5413.21	0	0.67	5413.88	2955.99	0	0	53.155	1.005	857.927	825.384	32.543	1	162.238	0	0	Yes		1017.72					1017.72	1	No	0	0	Yes	35	100.985	470.454	318.036	889.474
220	1251	755	12	Lerma-Santiago	Río Santiago 5	Nayarit	2558.79	Santiago	6 de Junio de 2018	2332.89	6 de Junio de 2018	2.721		402.327	2600.51	4172.8	0	2.632	4175.43	2457.99	0	0	132.691	-11.532	1164.24	957.096	207.144	1	142.997	0	0	Yes		1758.66					1758.66	1	No	0	0	Yes	59	271.89	686.111	515.527	1473.53
221	1252	337	12	Lerma-Santiago	Río Santiago 6	Nayarit	2072.27	Santiago	6 de Junio de 2018	3705.14	6 de Junio de 2018	68.644		734.065	1164.24	4677.81	0.002	68.448	4746.26	8591.34	0	167.625	4.286	0	5571.48	3705.14	1866.34	1	255.476	0	0	Yes		353.608					353.608	1	Yes	94.6438	1	Yes	46	310.792	307.278	479.491	1097.56
222	1253	417	12	Lerma-Santiago	Laguna Villa Corona A	Jalisco	343.443							35.93	0	1.664	0	0	1.664	0.719	0	0	7.192	-0.15	27.943	27.943	0	0	24.2304	0	0	Yes	43.0093						43.0093	1	No	0	0	Yes	9	101.234	6.04793	100.632	207.913
223	1254	427	12	Lerma-Santiago	Laguna Villa Corona B	Jalisco	399.428							62.5	27.943	20.366	0	0	20.366	2.037	0	0	50.062	0	22.052	22.052	0	0	77.87	0	0	No							0	0	Yes	21.4817	1	Yes	11	67.5994	18.9527	193.696	280.248
224	1255	432	12	Lerma-Santiago	Laguna San Marcos-Zacoalco	Jalisco	464.99							47.09	0	0.109	0	0	0.109	0.082	0	0	71.852	0	-24.789	0	-24.789	0	152.816	0	0	No							0	0	No	0	0	Yes	6	27.0404	0	119.337	146.377
225	1256	454	12	Lerma-Santiago	Laguna de Sayula A	Jalisco	147.873							12.67	0	0.196	0	0	0.196	0.101	0	0	2.092	0.784	9.699	11.46	-1.761	0	24.2463	0	0	No							0	0	No	0	0	Yes	1	6.35598	0	27.8366	34.1926
226	1257	446	12	Lerma-Santiago	Laguna de Sayula B	Jalisco	1338.17							204.18	9.699	36.017	0	0	36.017	4.303	0	0	221.393	0.389	-39.616	0	-39.616	0	120.535	0	0	No							0	0	Yes	113.618	1	Yes	21	25.204	94.8374	360.583	480.625
227	1258	461	12	Lerma-Santiago	Laguna de Zapotlán	Jalisco	474.697							76	0	3.164	0.077	0	3.241	1.266	0	0	17.198	0	56.827	45.54	11.287	1	26.8934	0	0	Yes				2.8823			2.8823	1	Yes	14.8765	1	Yes	4	90.2783	0	39.2561	129.534
228	1301	364	13	Río Huicicila	Ixtapa	Nayarit	487.471							132.633	0	21.73	0.152	0	21.882	5.377	0	0	0	0	116.128	0	116.128	1	16.4982	0	0	No							0	0	No	0	0	Yes	16	69.8898	133.37	204.714	407.974
229	1302	410	13	Río Huicicila	Pitillal	Jalisco	431.851							98.63	0	0.099	0	0	0.099	0.028	0	0	0	0	98.559	0	98.559	1	0.100375	1	1	No							0	0	No	0	0	Yes	13	113.923	84.2414	124.354	322.518
230	1303	413	13	Río Huicicila	Cuale	Jalisco	266.625							90.896	0	8.108	0	0	8.108	5.857	0	0	0	0	88.646	0	88.646	1	8.92008	1	1	No							0	0	No	0	0	Yes	9	78.5441	79.4353	75.7403	233.72
231	1304	362	13	Río Huicicila	San Blas	Nayarit	926.309							319.859	0	244.308	0.34	0	244.648	96.477	167.625	0	0	0	339.313	0	339.313	1	76.4862	0	0	No							0	0	Yes	185.703	1	Yes	14	212.143	12.3551	152.049	376.547
232	1305	369	13	Río Huicicila	Huicicila	Nayarit	1796.01							457.469	0	40.976	0.264	0	41.24	9.857	0	0	0	0	426.086	0	426.086	1	9.01482	1	1	Yes		13.7595					13.7595	1	No	0	0	Yes	34	95.7591	142.468	583.753	821.98
233	1306	415	13	Río Huicicila	Tecomala	Jalisco	768.124							230.58	0	2.884	0	0	2.884	1.492	0	0	0	0	229.188	0	229.188	1	1.25076	1	1	No							0	0	No	0	0	Yes	29	293.416	223.298	165.701	682.416
234	1401	395	14	Río Ameca	Salado	Jalisco	1511.62	Ameca	6 de Junio de 2018	14.929	6 de Junio de 2018	10.096		259.034	0	44.547	0	9.532	54.08	10.162	0	0	18.748	2.249	194.12	167.065	27.055	1	25.3032	0	0	Yes	179.854	4.4411					184.295	1	Yes	18.0866	1	Yes	41	678.553	162.596	142.291	983.44
235	1402	414	14	Río Ameca	Cocula	Jalisco	1160.07	Ameca	6 de Junio de 2018	244.515				184.582	194.12	79.288	0	0	79.288	16.17	0	0	0	0	315.584	260.55	55.034	1	20.9368	0	0	Yes	31.7818						31.7818	1	No	0	0	Yes	19	277.354	14.6287	185.383	477.365
236	1403	379	14	Río Ameca	Ahuacatlán	Nayarit, Jalisco	1275.15	Ameca	6 de Junio de 2018	92.939				207.21	0	23.102	0	0	23.102	7.997	0	0	0	0	192.105	158.605	33.501	1	11.1491	0	0	Yes		226.5					226.5	1	No	0	0	Yes	12	60.6068	11.9719	200.827	273.406
237	1404	397	14	Río Ameca	Atenguillo	Nayarit, Jalisco	1878.7	Ameca	6 de Junio de 2018	120.066				205.157	0	4.598	0	0	4.598	1.682	0	0	0	0	202.241	166.973	35.268	1	2.24121	1	1	Yes		998.915					998.915	1	No	0	0	Yes	45	112.347	272.053	716.077	1100.48
238	1405	388	14	Río Ameca	Ameca Pijinto	Nayarit, Jalisco	2604.79	Ameca	6 de Junio de 2018	869				366.837	709.93	21.73	0	0	21.73	5.413	0	0	0	0	1060.45	871.732	188.718	1	2.01808	1	1	Yes	0.207577	848.693					848.901	1	No	0	0	Yes	53	375.238	439.731	541.005	1355.97
239	1406	384	14	Río Ameca	Ameca Ixtapa A	Nayarit, Jalisco	1450.22	Ameca	6 de Junio de 2018	1128.94				357.684	1060.45	2.69	0	0	2.69	0.841	0	0	0	0	1416.28	1163.76	252.521	1	0.189686	1	1	Yes		1132.98					1132.98	1	No	0	0	Yes	32	109.728	385.165	325.071	819.965
240	1407	416	14	Río Ameca	Talpa	Jalisco	590.644	Ameca	6 de Junio de 2018	30.655	6 de Junio de 2018	0.542		70.826	0	0.262	0	0.542	0.804	0.131	0	0	0	0	70.153	60.088	10.065	1	0.369921	1	1	No							0	0	No	0	0	Yes	16	115.293	221.753	38.4002	375.447
241	1408	408	14	Río Ameca	Mascota	Jalisco	1427.84	Ameca	6 de Junio de 2018	193.213	6 de Junio de 2018	0.374		398.9	70.153	107.768	0.114	0.374	108.256	85.156	0	0	0	0	445.953	366.44	79.513	1	23	0	0	Yes		27.3324					27.3324	1	No	0	0	Yes	35	185.7	305.474	412.498	903.672
242	1409	396	14	Río Ameca	Ameca Ixtapa B	Nayarit, Jalisco	888.27	Ameca	6 de Junio de 2018	1640	6 de Junio de 2018	0.944		238.565	1862.24	102.144	0	0.944	103.088	20.514	0	0	0	0	2018.23	1640	378.227	1	4.86214	1	1	Yes		275.701					275.701	1	No	0	0	Yes	19	50.975	57.6787	335.561	444.215
243	1501	425	15	Costa de Jalisco	Río Tecolotán	Jalisco	446.575							149.483	0	0.215	122.207	0	122.422	122.306	0	0	0	0	149.367	0	149.367	1	81.8969	0	0	No							0	0	No	0	0	Yes	17	188.012	110.39	81.5213	379.923
244	1502	433	15	Costa de Jalisco	Río Ipala	Jalisco	378.21	Costa de Jalisco	6 de Junio de 2018	62.626				115.968	0	2.282	0	0	2.282	2.175	0	0	0	0	115.861	62.626	53.235	1	1.96778	1	1	Yes						2.18119	2.18119	1	Yes	8.76864	1	Yes	5	55.4831	47.5949	34.8322	137.91
245	1503	434	15	Costa de Jalisco	Río María García	Jalisco	606.958							199.802	0	213.189	0.16	0	213.349	43.214	212.47	0	0	0	242.137	0	242.137	1	106.78	0	0	Yes						1.51487	1.51487	1	Yes	6.8592	1	Yes	5	55.7536	32.4667	37.4061	125.626
246	1504	430	15	Costa de Jalisco	Río Tomatlán A	Jalisco	1145.65	Costa de Jalisco	6 de Junio de 2018	180.702				854.838	0	995.655	0	0	995.655	533.402	0	0	26.737	2.491	363.357	267.904	95.453	1	119.892	0	0	No							0	0	No	0	0	Yes	21	134.344	289.075	150.767	574.186
247	1505	440	15	Costa de Jalisco	Río Tomatlán B	Jalisco	1216.44	Costa de Jalisco	6 de Junio de 2018	496.904				316.281	363.357	155.942	0	0	155.942	493.98	0	212.47	0	0	805.206	496.9	308.306	1	54.2071	0	0	Yes						2.20991	2.20991	1	Yes	15.2796	1	Yes	9	140.78	40.5469	76.6245	257.951
248	1506	439	15	Costa de Jalisco	Río San Nicolás A	Jalisco	2329.49	Costa de Jalisco	6 de Junio de 2018	316.67				442.189	0	14.191	0.623	0	14.814	4.4	0	0	0	0	431.775	316.67	115.105	1	3.35015	1	1	Yes		4.98231				0.243913	5.22622	1	Yes	10.8705	1	Yes	59	198.902	965.155	315.939	1480
249	1507	475	15	Costa de Jalisco	Río San Nicolás B	Jalisco	406.869	Costa de Jalisco	6 de Junio de 2018	39.05				40.795	0	1.637	0	0	1.637	0.989	0	0	0	0	40.147	39.05	1.097	1	4.01275	1	1	Yes					83.4305	1.07571	84.5062	1	Yes	83.4305	1	Yes	8	173.643	28.0905	24.0424	225.776
250	1508	464	15	Costa de Jalisco	Río Cuitzmala	Jalisco	1080.48	Costa de Jalisco	6 de Junio de 2018	153				207.486	0	6.281	0.229	0	6.51	1.482	0	0	0	0	202.458	153	49.458	1	3.13756	1	1	Yes					47.2616	0.406136	47.6677	1	Yes	47.2618	1	Yes	15	31.9933	89.5129	240.555	362.061
251	1509	463	15	Costa de Jalisco	Río Purificación	Jalisco, Colima	2251.52	Costa de Jalisco	6 de Junio de 2018	186.81				475.836	0	46.943	0.52	0	47.463	11.476	0	0	0	0	439.849	186.81	253.039	1	9.97466	1	1	Yes					186.655	0.356219	187.011	1	Yes	5.83152	1	Yes	28	164.72	202.154	337.153	704.028
252	1510	478	15	Costa de Jalisco	Río Marabasco A	Jalisco, Colima	2198.65	Costa de Jalisco	6 de Junio de 2018	269.792				499.924	0	72.643	0.033	0	72.676	16.954	0	0	0	0	444.202	269.792	174.41	1	14.5374	0	0	Yes					466.846		466.846	1	Yes	1.29452	1	Yes	57	405.309	592.111	395.606	1393.03
253	1511	491	15	Costa de Jalisco	Río Marabasco B	Colima	887.023							210.439	0	12.476	0	0	12.476	5.363	0	0	88.604	0	114.722	0	114.722	1	48.0329	0	0	No							0	0	Yes	89.529	1	Yes	19	196.71	114.234	185.313	496.256
254	1601	428	16	Armería-Coahuayana	Tacotán	Jalisco	1161.91							156.48	0	126.776	0	0	126.776	0.344	0	0	4.054	0.494	25.5	21.161	4.339	1	83.9238	0	0	Yes	24.5478	7.30682					31.8546	1	No	0	0	Yes	26	81.1559	387.989	230.46	699.606
255	1602	462	16	Armería-Coahuayana	Corcovado	Jalisco	1599.65							242.578	25.5	272.661	0	0	272.661	387.536	0	0	9.386	7.196	366.371	254.823	111.548	1	107.895	0	0	Yes		3.0784					3.0784	1	No	0	0	Yes	36	102.105	553.243	242.165	897.513
256	1603	453	16	Armería-Coahuayana	Las Piedras	Jalisco	1730.3							155.979	0	109.733	0	0	109.733	2.746	0	0	5.839	-0.522	43.675	30.912	12.763	1	73.7599	0	0	Yes	94.2985						94.2985	1	No	0	0	Yes	38	140.13	355.545	436.777	932.451
257	1604	456	16	Armería-Coahuayana	El Rosario	Jalisco	1687.84							214.465	43.675	14.418	0	0	14.418	100.291	0	0	0	0	344.014	239.273	104.741	1	5.58534	1	1	Yes				2.91481			2.91481	1	No	0	0	Yes	32	111.755	187.361	496.44	795.556
258	1605	466	16	Armería-Coahuayana	Canoas	Jalisco	1294.77							233.8	710.384	207.05	83.92	0	290.97	30.507	0	0	0	0	683.722	386.96	296.762	1	30.8171	0	0	Yes					507.098		507.098	1	No	0	0	Yes	14	117.237	49.0369	169.57	335.845
259	1606	480	16	Armería-Coahuayana	Armería	Colima, Jalisco	2289.94							756.654	683.722	873.128	5.38	0	878.508	111.866	0	0	0	0	673.734	0	673.734	1	60.9916	0	0	Yes	50.3718	1.65075		26.3658	227.412		305.8	1	No	0	0	Yes	27	171.037	57.1673	433.835	662.04
260	1607	458	16	Armería-Coahuayana	Quito	Jalisco	2386.56							467.938	0	60.508	1.002	0	61.511	10.079	0	0	0	0	416.507	172.304	244.203	1	13.1449	0	0	Yes				0.091777			0.091777	1	No	0	0	Yes	58	901.235	265.074	273.641	1439.95
261	1608	507	16	Armería-Coahuayana	Barreras	Michoacán de Ocampo, Colima, Jalisco	1878.53							337.664	0	12.721	0.025	0	12.746	2.96	0	0	9.407	0.317	318.154	131.616	186.538	1	6.65454	1	1	No							0	0	No	0	0	Yes	46	472.982	261.23	339.541	1073.75
262	1609	482	16	Armería-Coahuayana	Coahuayana 1	Michoacán de Ocampo, Colima	2504.1							648.374	734.661	126.022	0.099	0	126.121	18.118	0	0	0	0	1275.03	453.518	821.513	1	9.11915	1	1	Yes				32.6163			32.6163	1	No	0	0	Yes	40	685.184	116.683	226.552	1028.42
263	1610	744	16	Armería-Coahuayana	Coahuayana 2	Michoacán de Ocampo, Colima, Jalisco	1016.6							217.368	1275.03	539.939	0.039	0	539.977	61.318	0	0	12.628	0.039	1001.07	0	1001.07	1	37.0306	0	0	No							0	0	Yes	1.46282	1	Yes	11	38.7014	49.7954	166.08	254.576
264	1701	518	17	Costa de Michoacán	Ríos Aquila-Ostuta	Michoacán de Ocampo	1317.44							191.556	0	6.591	0.048	0	6.64	1.813	0	0	0	0	186.729	0	186.729	1	3.46583	1	1	Yes						1.15042	1.15042	1	Yes	1.03933	1	Yes	15	16.022	172.667	174.37	363.058
265	1702	509	17	Costa de Michoacán	Río Coalcomán	Michoacán de Ocampo, Jalisco	1990.18							518.218	0	12.07	0.208	0	12.278	3.7	0	0	0	0	509.64	0	509.64	1	2.36927	1	1	No							0	0	No	0	0	Yes	24	50.0019	188.397	361.326	599.725
266	1703	534	17	Costa de Michoacán	Ríos Marmeyera-Tupitina	Michoacán de Ocampo	1045.24							182.645	0	1.662	0	0	1.662	0.536	0	0	0	0	181.519	0	181.519	1	0.909962	1	1	Yes						0.734486	0.734486	1	Yes	0.0026154	1	Yes	24	25.001	415.515	183.357	623.872
267	1704	515	17	Costa de Michoacán	Río Nexpa	Michoacán de Ocampo	2252.21							362.161	0	7.558	0	0	7.558	2.654	0	0	0	0	357.258	0	357.258	1	2.08692	1	1	No							0	0	No	0	0	Yes	46	136.128	381.524	544.772	1062.42
268	1705	529	17	Costa de Michoacán	Río Chula	Michoacán de Ocampo	1353.93							191.022	0	0.769	0.003	0	0.772	0.431	0	0	0	0	190.68	0	190.68	1	0.404142	1	1	No							0	0	No	0	0	Yes	23	140.394	282.625	155.992	579.011
269	1706	537	17	Costa de Michoacán	Río Acapilcan	Michoacán de Ocampo	1073.3							167.584	0	1.287	0	0	1.287	0.756	0	0	0	0	167.053	0	167.053	1	0.767973	1	1	No							0	0	Yes	10.3024	1	Yes	9	40.0928	48.9382	127.307	216.339
270	1801	472	18	Balsas	Río Alto Atoyac	Tlaxcala, Puebla, Estado de México	4001.66				24 de junio de 2011			551.059	0	337.45	0.047	0.708	338.205	231.526	0	348.731	54.055	3.318	38.276	44.825	-6.549	0	134.94	0	0	Yes				410.738			410.738	1	Yes	174.118	1	Yes	34	175.569	30.0972	680.43	886.096
271	1802	492	18	Balsas	Río Amacuzac	Estado de México, Morelos, Guerrero, Puebla, Ciudad de México	8862.95				24 de junio de 2011			2305.19	0	1112.89	66.493	45.976	1225.36	341.085	0	6	13.682	-0.036	1401.27	1641.04	-239.771	0	52.0145	0	0	Yes	522.392	0.713066		327.137	516.217		1366.46	1	Yes	2.76153	1	Yes	111	474.939	573.848	1693.52	2742.31
272	1803	554	18	Balsas	Río Tlapaneco	Guerrero, Puebla, Oaxaca	4975.69				24 de junio de 2011			1053.31	0	33.349	0	4.198	37.547	17.608	0	0	0	0	1033.37	1210.19	-176.82	0	3.16613	1	0	No							0	0	No	0	0	Yes	46	25.055	231.348	899.745	1156.15
273	1804	494	18	Balsas	Río Nexapa	Puebla, Estado de México, Morelos	4219.52				24 de junio de 2011			342.518	0	593.925	0	1.658	595.583	182.778	97.864	0	2.396	0	25.181	29.49	-4.309	0	174.099	0	0	Yes				85.7552	69.1717		154.927	1	Yes	8.12148	1	Yes	41	132.507	249.496	628.723	1010.73
274	1805	525	18	Balsas	Río Mixteco	Puebla, Oaxaca	11082.7				24 de junio de 2011			866.167	0	102.323	0.003	7.923	110.248	50.728	0	0	4.167	0	802.48	939.792	-137.313	0	12.2947	0	0	Yes	39.1184				222.149		261.267	1	No	0	0	Yes	116	447.625	1044.28	1470	2961.91
275	1806	490	18	Balsas	Río Bajo Atoyac	Puebla, Guerrero, Tlaxcala	11970.1				24 de junio de 2011			775.087	3300.57	262.914	0	7.479	270.393	65.115	176.965	0	0	0	4047.34	4786.15	-738.81	0	6.45084	1	0	Yes				96.9007	90.0942		186.995	1	Yes	63.102	1	Yes	81	139.604	570.612	1252.59	1962.8
276	1807	469	18	Balsas	Río Cutzamala	Estado de México, Michoacán de Ocampo, Guerrero	10643				24 de junio de 2011			2595.35	0	3846.19	126.393	8.972	3981.56	2351.03	0	484.551	61.178	94.242	324.853	384.152	-59.299	0	177.724	0	0	Yes	144.194	1394.11		203.707	459.152		2201.16	1	No	0	0	Yes	185	242.505	1729.35	2664.17	4636.03
277	1808	508	18	Balsas	Río Medio Balsas	Guerrero, Estado de México, Michoacán de Ocampo	21270.5				24 de junio de 2011			3253.33	4372.2	4814.62	10.776	20.154	4845.55	5668.6	6	0	111.388	22.283	8320.91	10748.7	-2427.83	0	65.0324	0	0	Yes					3.49375		3.49375	1	No	0	0	Yes	264	653.352	2318.58	3683.87	6655.81
278	1809	479	18	Balsas	Río Cupatitzio	Michoacán de Ocampo	2676.53				24 de junio de 2011			1176.6	0	1934.45	0	14.186	1948.64	1223.02	0	0	0	0	450.982	582.567	-131.585	0	164.411	0	0	Yes				4.54859			4.54859	1	No	0	0	Yes	57	649.344	285.763	511.532	1446.64
279	1810	483	18	Balsas	Río Tacámbaro	Michoacán de Ocampo	5493.9				24 de junio de 2011			967.942	0	228.652	0.231	0	228.883	87.297	0	0	0	0	826.357	1067.47	-241.11	0	23.6464	0	0	No							0	0	No	0	0	Yes	96	278.679	1113.8	940.465	2332.94
280	1811	741	18	Balsas	Río Tepalcatepec	Michoacán de Ocampo, Jalisco	11609.7				24 de junio de 2011			1957.21	0	1723.17	26.811	3.351	1753.34	870.369	0	0	55.019	12.078	1007.15	1301.01	-293.86	0	92.8405	0	0	Yes	232.399						232.399	1	No	0	0	Yes	185	1812.95	1090.79	1755.85	4659.59
281	1812	496	18	Balsas	Río Bajo Balsas	Michoacán de Ocampo, Guerrero	13972.8				24 de junio de 2011			2296.38	10605.4	16070.6	0.048	0.305	16070.9	14396.8	0	0	565.165	30.069	10632.4	0	10632.4	1	129.175	0	0	Yes					2637.04		2637.04	1	Yes	0.9002	1	Yes	149	201.837	1333.46	2162.79	3698.09
282	1813	743	18	Balsas	Río Paracho-Nahuatzen	Michoacán de Ocampo	832.516							89.4	0	0.01	0	0	0.01	0.002	0	0	0	0	89.392	89.608	-0.217	0	0.0111857	1	0	No							0	0	No	0	0	Yes	2	32.4346	25.0009	3.5445	60.98
283	1814	486	18	Balsas	Río Zirahuén	Michoacán de Ocampo	269.482							51.216	0	3.295	0	0	3.295	1.999	0	0	0	0	49.92	52.998	-3.078	0	6.43354	1	0	No							0	0	No	0	0	Yes	10	164.331	8.64915	73.3179	246.298
284	1815	471	18	Balsas	Río Libres Oriental	Puebla, Tlaxcala, Veracruz-Llave	4726.88				24 de junio de 2011			294.067	0	3.983	8.942	2.58	15.505	4.637	0	0	0	0	283.198	292.436	-9.238	0	4.39526	1	0	Yes				228.327			228.327	1	No	0	0	Yes	35	318.173	175.818	373.763	867.754
285	1901	550	19	Costa Grande de Guerrero	Río Cofradía	Guerrero	587.566							101.117	0	0.611	0	0	0.611	0.248	0	0	0	0	100.754	0	100.754	1	0.604251	1	1	No							0	0	No	0	0	Yes	0	0	0	10.391	10.391
286	1902	548	19	Costa Grande de Guerrero	Río La Unión 1	Guerrero	1108.42							240.765	0	5.098	0	0	5.098	1.069	0	0	0	0	236.737	1.171	235.566	1	2.11742	1	1	No							0	0	No	0	0	Yes	14	24.2325	62.704	319.938	406.874
287	1903	556	19	Costa Grande de Guerrero	Río La Unión 2	Guerrero	110.292							17.1	236.737	1.257	0	0	1.257	0.262	0	0	0	0	252.842	0	252.842	1	0.4952	1	1	No							0	0	No	0	0	Yes	1	0	0	14.4899	14.4899
288	1904	565	19	Costa Grande de Guerrero	Río Pontla	Guerrero	591.306							92.708	0	0.565	0	0	0.565	0.162	0	0	0	0	92.306	0	92.306	1	0.60944	1	1	No							0	0	No	0	0	Yes	5	20.6849	24.9845	79.206	124.875
289	1905	557	19	Costa Grande de Guerrero	Río Ixtapa 1	Guerrero	837.819	Costa Grande de Guerrero	6 de Junio de 2018	94.389	6 de Junio de 2018	0.271		269.387	0	0.347	0	0.253	0.6	0.13	0	0	0	0	268.917	96.612	172.305	1	0.128811	1	1	No							0	0	No	0	0	Yes	6	0	25.6731	137.531	163.204
290	1906	574	19	Costa Grande de Guerrero	Río Ixtapa 2	Guerrero	28.6641	Costa Grande de Guerrero	6 de Junio de 2018	95.954	6 de Junio de 2018	2.469		5.04	268.917	0	0	2.469	2.469	0	0	0	0	0	271.488	95.954	175.534	1	0	1	1	No							0	0	No	0	0	Yes	1	0.219179	0	11.9889	12.2081
291	1907	577	19	Costa Grande de Guerrero	Río Zihuatanejo	Guerrero	308.106							46	0	0.025	0	0	0.025	0.012	0	0	0	0	45.987	0	45.987	1	0.0543478	1	1	No							0	0	No	0	0	Yes	4	21.0346	0	86.8661	107.901
292	1908	566	19	Costa Grande de Guerrero	Río San Jeronimito	Guerrero	750.057	Costa Grande de Guerrero	6 de Junio de 2018	136.6	6 de Junio de 2018	0.81		343.489	0	3.565	0	0.77	4.335	0.789	0	0	0	0	339.944	146.013	193.93	1	1.03788	1	1	No							0	0	No	0	0	Yes	11	0	29.5875	234.469	264.057
293	1909	570	19	Costa Grande de Guerrero	Río Petatlán 1	Guerrero	454.997	Costa Grande de Guerrero	6 de Junio de 2018	146.504	6 de Junio de 2018	0.105		351.405	0	0.21	0	0.105	0.315	0.079	0	0	0	0	351.169	150.835	200.334	1	0.0597601	1	1	No							0	0	No	0	0	Yes	7	0	25.001	156.694	181.695
294	1910	585	19	Costa Grande de Guerrero	Río Petatlán 2	Guerrero	119.545	Costa Grande de Guerrero	6 de Junio de 2018	289.885	6 de Junio de 2018	2.733		21.775	691.112	14.855	0	2.733	17.588	2.975	0	0	0	0	698.274	289.89	408.384	1	2.08378	1	1	No							0	0	No	0	0	Yes	2	0.1919	0.724759	54.4466	55.3632
295	1911	591	19	Costa Grande de Guerrero	Río Tule	Guerrero	324.923							74.448	0	1.437	0	0	1.437	0.316	0	0	0	0	73.327	0	73.327	1	1.93021	1	1	No							0	0	No	0	0	Yes	8	8.75561	76.833	103.533	189.122
296	1912	573	19	Costa Grande de Guerrero	Río Coyuquilla 1	Guerrero	530.499	Costa Grande de Guerrero	6 de Junio de 2018	179.687	6 de Junio de 2018	0.002		394.022	0	9.434	0	0	9.434	1.957	0	0	0	0	386.545	193.439	193.106	1	2.39428	1	1	No							0	0	No	0	0	Yes	6	0	41.8715	99.0968	140.968
297	1913	599	19	Costa Grande de Guerrero	Río Coyuquilla 2	Guerrero	62.8533	Costa Grande de Guerrero	6 de Junio de 2018	186.466	6 de Junio de 2018	0.21		15.157	386.545	15.963	0	0.21	16.173	3.227	0	0	0	0	388.756	186.466	202.29	1	3.97384	1	1	No							0	0	No	0	0	Yes	1	0	11.2195	32.7657	43.9852
298	1914	601	19	Costa Grande de Guerrero	Río Porvenir	Guerrero	189.613							48.426	0	0.048	0	0	0.048	0.015	0	0	0	0	48.394	0	48.394	1	0.0991203	1	1	Yes						0.991681	0.991681	1	No	0	0	Yes	2	0	19.2629	24.4881	43.751
299	1915	576	19	Costa Grande de Guerrero	Río San Luis 1	Guerrero	858.351	Costa Grande de Guerrero	6 de Junio de 2018	138.199	6 de Junio de 2018	0.213		423.927	0	23.874	0	0.206	24.08	4.855	0	0	0	0	404.702	140.196	264.507	1	5.63163	1	1	No							0	0	No	0	0	Yes	16	0	163.243	241.227	404.47
300	1916	607	19	Costa Grande de Guerrero	Río San Luis 2	Guerrero	20.0709	Costa Grande de Guerrero	6 de Junio de 2018	139.565	6 de Junio de 2018	0.824		3.263	404.702	1.009	0	0.824	1.833	0.206	0	0	0	0	406.339	139.565	266.774	1	0.247325	1	1	No							0	0	No	0	0	Yes	0	0	4.89325	4.22481	9.11807
301	1917	603	19	Costa Grande de Guerrero	Laguna de Nuxco	Guerrero	338.335							66.82	0	0.044	0	0	0.044	0.031	0	0	0	0	66.807	0	66.807	1	0.0658485	1	1	No							0	0	No	0	0	Yes	6	0	92.9433	47.9248	140.868
302	1918	582	19	Costa Grande de Guerrero	Río Tecpan 1	Guerrero	1190.52	Costa Grande de Guerrero	6 de Junio de 2018	620.381	6 de Junio de 2018	0.716		1118.63	0	0.436	0	0.108	0.544	0.166	0	0	0	0	1118.25	615.198	503.056	1	0.0389762	1	1	No							0	0	No	0	0	Yes	26	16.8872	352.638	277.862	647.387
303	1919	605	19	Costa Grande de Guerrero	Río Tecpan 2	Guerrero	208.917	Costa Grande de Guerrero	6 de Junio de 2018	613	6 de Junio de 2018	0.824		55.098	1118.25	34.509	0	1.815	36.324	6.932	0	0	0	0	1143.96	613	530.96	1	2.94106	1	1	No							0	0	No	0	0	Yes	3	24.6913	57.6779	16.5976	98.9667
304	1920	616	19	Costa Grande de Guerrero	Río El Tular	Guerrero	177.542							57.749	0	0.013	0	0	0.013	0.01	0	0	0	0	57.746	0	57.746	1	0.0225112	1	1	No							0	0	No	0	0	Yes	2	5.9577	14.9163	16.0301	36.9041
305	1921	589	19	Costa Grande de Guerrero	Río Atoyac 1	Guerrero	822.268	Costa Grande de Guerrero	6 de Junio de 2018	252.089	6 de Junio de 2018	0.716		677.669	0	32.857	0	0.647	33.503	8.126	0	0	0	0	652.292	254.49	397.802	1	4.84853	1	1	No							0	0	No	0	0	Yes	18	37.0695	296.717	90.3602	424.147
306	1922	618	19	Costa Grande de Guerrero	Río Atoyac 2	Guerrero	56.855	Costa Grande de Guerrero	6 de Junio de 2018	259.258	6 de Junio de 2018	0.824		14.333	652.292	0	0	0.824	0.824	0	0	0	0	0	665.801	259.258	406.543	1	0	1	1	No							0	0	No	0	0	Yes	1	0	0	27.8594	27.8594
307	1923	613	19	Costa Grande de Guerrero	Arroyo Cacaluta	Guerrero	525.038							122.63	0	0.154	0	0	0.154	0.115	0	0	0	0	122.592	0	122.592	1	0.125581	1	1	No							0	0	No	0	0	Yes	13	88.7774	130.093	58.4218	277.292
308	1924	596	19	Costa Grande de Guerrero	Río Coyuca 1	Guerrero	1284.68	Costa Grande de Guerrero	6 de Junio de 2018	151.998	6 de Junio de 2018	5.8		356.484	0	11.492	0	0.502	11.993	3.919	0	0	0	0	348.41	151.651	196.759	1	3.22371	1	1	No							0	0	No	0	0	Yes	35	277.691	364.343	233.995	876.029
309	1925	631	19	Costa Grande de Guerrero	Río Coyuca 2	Guerrero	29.1456	Costa Grande de Guerrero	6 de Junio de 2018	154.242	6 de Junio de 2018	0.388		6.849	348.41	0.003	0	0.388	0.391	0.002	0	0	0	0	354.87	154.242	200.628	1	0.000844454	1	1	No							0	0	No	0	0	Yes	0	28.0745	0	1.07108	29.1456
310	1926	624	19	Costa Grande de Guerrero	Laguna de Coyuca	Guerrero	433.265							101.297	0	14.167	0	0	14.167	2.923	0	0	0	0	90.053	0	90.053	1	13.9856	0	0	Yes				33.4598			33.4598	1	No	0	0	Yes	12	135.521	70.5282	63.0662	269.115
311	1927	617	19	Costa Grande de Guerrero	Río La Sabana 1	Guerrero	319.387	Costa Grande de Guerrero	6 de Junio de 2018	38.956	6 de Junio de 2018	1.523		92.482	0	1.873	0	1.523	3.396	1.178	0	0	0	0	90.265	42.373	47.892	1	2.02526	1	1	No							0	0	No	0	0	Yes	8	24.9869	21.0638	134.337	180.388
312	1928	637	19	Costa Grande de Guerrero	Río La Sabana 2	Guerrero	441.855	Costa Grande de Guerrero	6 de Junio de 2018	83.15	6 de Junio de 2018	8.32		105.379	90.265	0.571	0	8.32	8.891	0.426	0	0	0	0	187.179	83.15	104.029	1	0.291857	1	1	Yes				2.81315			2.81315	1	No	0	0	Yes	6	110.735	0	32.2788	143.013
313	2001	586	20	Costa Chica de Guerrero	Río Papagayo 1	Guerrero	1958.17	Costa Chica de Guerrero	6 de Junio de 2018	280.248	6 de Junio de 2018	1.372	3 de Mayo 2022	1497.87	0	3.604	0	1.372	4.976	1.044	0	0	0	0	1493.94	1460.72	33.216	1	0.240608	1	1	No							0	0	No	0	0	Yes	49	328.272	538.825	380.81	1247.91
314	2002	584	20	Costa Chica de Guerrero	Río Petaquillas	Guerrero	882.27	Costa Chica de Guerrero	6 de Junio de 2018	12.633	6 de Junio de 2018	31.376	3 de Mayo 2022	372.071	0	255.233	0	31.359	286.593	8.391	0	0	0	0	93.869	91.815	2.054	1	68.5979	0	0	No							0	0	No	0	0	Yes	6	68.8796	0	79.8316	148.711
315	2003	730	20	Costa Chica de Guerrero	Río Omitlán	Guerrero	3374.48	Costa Chica de Guerrero	6 de Junio de 2018	280.903	6 de Junio de 2018	10.982	3 de Mayo 2022	1337.94	93.869	15.494	0	10.897	26.391	240.117	0	0	0	0	1645.53	1608.95	36.586	1	1.08213	1	1	No							0	0	No	0	0	Yes	46	113.758	432.16	628.38	1174.3
316	2004	602	20	Costa Chica de Guerrero	Río Papagayo 2	Guerrero	415.634	Costa Chica de Guerrero	6 de Junio de 2018	710.208	6 de Junio de 2018	3.789	3 de Mayo 2022	664.593	3139.47	1750.12	0	3.789	1753.91	0.835	0	0	25	0	2026	1941.4	84.597	1	46.6637	0	0	No							0	0	No	0	0	Yes	4	38.6963	23.6583	35.2713	97.6259
317	2005	622	20	Costa Chica de Guerrero	Río Papagayo 3	Guerrero	618.269	Costa Chica de Guerrero	6 de Junio de 2018	902.804	6 de Junio de 2018	0.695	3 de Mayo 2022	707.964	2026	4040.21	0	0.62	4040.83	1746.74	0	0	0	0	439.871	252.776	187.095	1	147.779	0	0	No							0	0	No	0	0	Yes	5	0	1.34419	126.667	128.011
318	2006	639	20	Costa Chica de Guerrero	Río Papagayo 4	Guerrero	306.14	Costa Chica de Guerrero	6 de Junio de 2018	858.243			3 de Mayo 2022	69.999	439.871	4106.04	0	0	4106.04	8128.78	0	0	0	0	4532.6	858.243	3674.36	1	805.311	0	0	No							0	0	No	0	0	Yes	0	10.5574	0	0	10.5574
319	2007	630	20	Costa Chica de Guerrero	Río Cortés	Guerrero	1104.77							267.214	0	3.179	0	0	3.179	0.844	0	0	0	0	264.879	0	264.879	1	1.18968	1	1	No							0	0	No	0	0	Yes	14	58.3127	81.0328	205.237	344.582
320	2008	620	20	Costa Chica de Guerrero	Río Nexpa 1	Guerrero	1122.3	Costa Chica de Guerrero	6 de Junio de 2018	176.613	6 de Junio de 2018	9.624	3 de Mayo 2022	565.061	0	317.762	0	9.624	327.386	273.314	0	0	14.1	0	496.889	228.844	268.045	1	58.7303	0	0	No							0	0	No	0	0	Yes	14	0	168.82	171.272	340.093
321	2009	655	20	Costa Chica de Guerrero	Río Nexpa 2	Guerrero	191.524	Costa Chica de Guerrero	6 de Junio de 2018	255.317	6 de Junio de 2018	1.462	3 de Mayo 2022	60.895	496.889	0.169	0	1.462	1.631	0.127	0	0	0	0	556.28	255.317	300.963	1	0.0302985	1	1	No							0	0	No	0	0	Yes	5	15.8016	20.7277	63.4258	99.9551
322	2010	632	20	Costa Chica de Guerrero	Río Copala	Guerrero	901.386							397.153	0	27.977	0	0	27.977	5.687	0	0	0	0	374.863	0	374.863	1	7.04439	1	1	No							0	0	No	0	0	Yes	10	103.206	58.3391	121.026	282.571
323	2011	625	20	Costa Chica de Guerrero	Río Marquelia 1	Guerrero	1013.58							802.437	0	10.116	0	0	10.116	2.247	0	0	0	0	794.568	0.162	794.407	1	1.26066	1	1	No							0	0	No	0	0	Yes	17	35.2778	115.042	256.203	406.524
324	2012	660	20	Costa Chica de Guerrero	Río Marquelia 2	Guerrero	116.964							29.083	794.568	0.168	0	0	0.168	0.034	0	0	0	0	823.518	0	823.518	1	0.020397	1	1	No							0	0	No	0	0	Yes	0	0.616763	0	3.43764	4.05441
325	2013	606	20	Costa Chica de Guerrero	Río Quetzala	Guerrero	1970.5	Costa Chica de Guerrero	6 de Junio de 2018	1515.39	6 de Junio de 2018	4.327	3 de Mayo 2022	3100.41	0	5.852	0	4.2	10.052	2.607	0	0	0	0	3092.97	1669.44	1423.52	1	0.188749	1	1	No							0	0	No	0	0	Yes	38	207.852	370.548	346.642	925.042
326	2014	746	20	Costa Chica de Guerrero	Río Infiernillo	Guerrero, Oaxaca	622.357	Costa Chica de Guerrero	6 de Junio de 2018	124.95	6 de Junio de 2018	1.374	3 de Mayo 2022	306.465	0	2.29	0	1.374	3.664	0.665	0	0	0	0	303.466	165.501	137.965	1	0.747231	1	1	No							0	0	No	0	0	Yes	17	25.001	190.418	209.758	425.177
327	2015	745	20	Costa Chica de Guerrero	Río Santa Catarina	Oaxaca, Guerrero	579.198	Costa Chica de Guerrero	6 de Junio de 2018	120.433	6 de Junio de 2018	0.249	3 de Mayo 2022	306.205	0	11.835	0	0.249	12.084	2.985	0	0	0	0	297.106	162.033	135.073	1	3.86506	1	1	No							0	0	No	0	0	Yes	20	107.539	185.354	173.079	465.973
328	2016	629	20	Costa Chica de Guerrero	Río Ometepec 1	Guerrero, Oaxaca	1323.99	Costa Chica de Guerrero	6 de Junio de 2018	476.404	6 de Junio de 2018	5.344	3 de Mayo 2022	597.431	600.572	9.511	0	5.135	14.647	2.538	0	0	0	0	1185.89	640.093	545.802	1	0.793905	1	1	No							0	0	No	0	0	Yes	37	213.476	373.186	348.296	934.958
998	2017	750	20	Costa Chica de Guerrero	Río Ometepec 2	Oaxaca, Guerrero	125.673	Costa Chica de Guerrero	6 de Junio de 2018	19.565			3 de Mayo 2022	43.291	0	0.016	0	0	0.016	0.012	0	0	0	0	43.287	23.364	19.923	1	0.0369592	1	1	No							0	0	No	0	0	No					0
330	2018	753	20	Costa Chica de Guerrero	Río Ometepec 3	Guerrero, Oaxaca	70.1253	Costa Chica de Guerrero	6 de Junio de 2018	4.735			3 de Mayo 2022	16.717	0	0.15	0	0	0.15	0.03	0	0	0	0	16.597	8.958	7.639	1	0.89729	1	1	No							0	0	No	0	0	Yes	2	12.2971	0	25.2718	37.5689
331	2019	659	20	Costa Chica de Guerrero	Río Cortijos 1	Oaxaca	556.874	Costa Chica de Guerrero	6 de Junio de 2018	62.367	6 de Junio de 2018	2.032	3 de Mayo 2022	132.877	0	5.571	0	1.901	7.472	1.528	0	0	0	0	126.933	71.153	55.78	1	4.1926	1	1	No							0	0	No	0	0	Yes	19	110.283	250.736	96.9562	457.975
332	2020	748	20	Costa Chica de Guerrero	Río Cortijos 2	Oaxaca, Guerrero	60.0634	Costa Chica de Guerrero	6 de Junio de 2018	14.269	6 de Junio de 2018	0.275	3 de Mayo 2022	28.207	0	0.26	0	0.275	0.535	0.086	0	0	0	0	27.758	15.56	12.198	1	0.921757	1	1	No							0	0	No	0	0	Yes	1	0	0	18.9482	18.9482
333	2021	749	20	Costa Chica de Guerrero	Río Cortijos 3	Oaxaca, Guerrero	507.155	Costa Chica de Guerrero	6 de Junio de 2018	133.119	6 de Junio de 2018	0.885	3 de Mayo 2022	114.938	154.691	4.751	0	0.885	5.636	1.182	0	0	0	0	265.175	146.169	119.006	1	1.76205	1	1	No							0	0	No	0	0	Yes	10	29.4197	58.1806	207.759	295.359
334	2022	751	20	Costa Chica de Guerrero	Río Cortijos 4	Guerrero, Oaxaca	75.3599	Costa Chica de Guerrero	6 de Junio de 2018	145.543	6 de Junio de 2018	0.079	3 de Mayo 2022	19.557	265.175	7.048	0	0.079	7.127	1.41	0	0	0	0	279.015	150.6	128.415	1	2.47531	1	1	No							0	0	No	0	0	Yes	0	0	0	0.619465	0.619465
335	2023	747	20	Costa Chica de Guerrero	Río Ometepec 4	Guerrero, Oaxaca	1318	Costa Chica de Guerrero	6 de Junio de 2018	2723.65	6 de Junio de 2018	10.832	3 de Mayo 2022	448.959	4617.76	0.542	0	10.8	11.342	0.371	0	0	0	0	5055.75	2723.65	2332.1	1	0.0106973	1	1	Yes						0.160206	0.160206	1	Yes	0.0496342	1	Yes	13	0	36.4401	294.342	330.782
336	2024	668	20	Costa Chica de Guerrero	Río La Arena 1	Oaxaca	857.765	Costa Chica de Guerrero	6 de Junio de 2018	94.513	6 de Junio de 2018	6.927	3 de Mayo 2022	245.831	0	4.205	1.038	6.927	12.17	2.122	0	0	0	0	235.783	101.121	134.662	1	2.13277	1	1	No							0	0	No	0	0	Yes	10	12.3407	78.4332	172.036	262.81
337	2025	682	20	Costa Chica de Guerrero	Río La Arena 2	Oaxaca	483.579	Costa Chica de Guerrero	6 de Junio de 2018	33.184	6 de Junio de 2018	0.577	3 de Mayo 2022	138.806	235.783	1.234	0	0.577	1.811	0.373	0	0	0	0	373.151	159	214.151	1	0.329428	1	1	No							0	0	No	0	0	Yes	9	68.7554	40.383	116.073	225.212
338	2026	754	20	Costa Chica de Guerrero	Laguna de Corralero	Guerrero, Oaxaca	885.46							173.369	0	0.492	0	0	0.492	0.103	0	0	0	0	172.98	0	172.98	1	0.283788	1	1	No							0	0	Yes	0.144342	1	Yes	17	223.489	50.085	178.87	452.444
339	2027	752	20	Costa Chica de Guerrero	Río La Arena 3	Guerrero, Oaxaca	193.352	Costa Chica de Guerrero	6 de Junio de 2018	33.184	6 de Junio de 2018	0.577	3 de Mayo 2022	62.116	0	0	0	0.029	0.029	0	0	0	0	0	62.087	33.184	28.903	1	0	1	1	Yes						0.979921	0.979921	1	Yes	0.328542	1	Yes	2	38.4298	0	6.81146	45.2412
340	2028	609	20	Costa Chica de Guerrero	Río Atoyac-Salado	Oaxaca	1192.98	Costa Chica de Guerrero	6 de Junio de 2018	35.033	6 de Junio de 2018	41.213	3 de Mayo 2022	137.62	0	12.776	0.015	41.213	54.004	4.157	0	0	0	0	87.773	55.888	31.885	1	9.29443	1	1	Yes			10.7745	24.3259			35.1004	1	No	0	0	Yes	17	143.719	79.3166	220.835	443.871
341	2029	595	20	Costa Chica de Guerrero	Río Atoyac-Tlapacoyan	Oaxaca	2360.08	Costa Chica de Guerrero	6 de Junio de 2018	269.493	6 de Junio de 2018	18.346	3 de Mayo 2022	268.02	87.773	35.067	0.206	18.318	53.591	10.835	0	0	0	0	313.038	179.853	133.185	1	9.91391	1	1	Yes				1.60504			1.60504	1	No	0	0	Yes	32	267.433	211.567	288.64	767.641
342	2030	580	20	Costa Chica de Guerrero	Río Sordo-Yolotepec	Oaxaca, Guerrero	7817.52	Costa Chica de Guerrero	6 de Junio de 2018	1841.09	6 de Junio de 2018	11.347	3 de Mayo 2022	3325.36	0	71.642	1.326	11.318	84.286	20.317	0	0	0	0	3261.39	1873.8	1387.59	1	2.19429	1	1	No							0	0	No	0	0	Yes	152	668.418	1673.8	1493.87	3836.08
343	2031	645	20	Costa Chica de Guerrero	Río Atoyac-Paso de la Reina	Oaxaca	5806.02	Costa Chica de Guerrero	6 de Junio de 2018	2211.75			3 de Mayo 2022	1811.01	3574.43	66.344	1.387	0	67.731	36.689	0	0	0	0	5354.39	3047.5	2306.89	1	1.25767	1	1	No							0	0	No	0	0	Yes	103	361.566	781.461	1430.67	2573.7
344	2032	679	20	Costa Chica de Guerrero	Río Verde	Oaxaca	1133.94	Costa Chica de Guerrero	6 de Junio de 2018	3270	6 de Junio de 2018	3.64	3 de Mayo 2022	463.51	5354.39	30.207	0.006	3.64	33.853	7.279	0	11.6	0	0	5779.73	3270	2509.72	1	0.718696	1	1	Yes				6.7984			6.7984	1	Yes	9.64125	1	Yes	9	64.609	22.334	175.079	262.022
345	2101	694	21	Costa de Oaxaca	Río San Francisco	Oaxaca	584.027							154.294	0	11.782	0.32	0	12.101	0.331	11.6	0	0	0	154.123	0	154.123	1	7.84347	1	1	Yes				107.992		0.537909	108.53	1	Yes	108.233	1	Yes	9	120.389	16.4629	50.2665	187.118
346	2102	689	21	Costa de Oaxaca	Río Grande	Oaxaca	473.183							121.24	0	0.666	0.001	0	0.667	0.229	0	0	0	0	120.802	0	120.802	1	0.550148	1	1	No							0	0	No	0	0	Yes	6	10.6576	69.4081	71.9961	152.062
347	2103	686	21	Costa de Oaxaca	Río Manialtepec	Oaxaca	918.924							211.338	0	3.547	0.013	0	3.56	1.515	0	0	0	0	209.294	0	209.294	1	1.68451	1	1	No							0	0	No	0	0	Yes	17	180.49	133.239	96.4781	410.207
348	2104	685	21	Costa de Oaxaca	Río Colotepec 1	Oaxaca	1665.55							419.616	0	4.232	0.039	0	4.271	2.462	0	0	0	0	417.808	0.459	417.349	1	1.01784	1	1	No							0	0	No	0	0	Yes	40	109.09	479.129	365.924	954.143
349	2105	708	21	Costa de Oaxaca	Río Colotepec 2	Oaxaca	384.336							44.384	417.808	0.508	0	0	0.508	0.14	0	0	0	0	461.823	0	461.823	1	0.109911	1	1	No							0	0	No	0	0	Yes	7	11.9676	27.2517	82.6986	121.918
350	2106	703	21	Costa de Oaxaca	Río Cozoaltepec 1	Oaxaca	272.44							42.997	0	0.85	0	0	0.85	0.463	0	0	0	0	42.611	0.058	42.552	1	1.97688	1	1	No							0	0	No	0	0	Yes	9	69.892	110.48	91.854	272.225
351	2107	711	21	Costa de Oaxaca	Río Cozoaltepec 2	Oaxaca	187.444							15.776	42.611	0.08	0	0	0.08	0.069	0	0	0	0	58.375	0	58.375	1	0.137017	1	1	Yes						0.769978	0.769978	1	No	0	0	Yes	5	6.12878	0.128505	106.085	112.343
352	2108	705	21	Costa de Oaxaca	Río Tonameca 1	Oaxaca	539.601							284.752	0	2.543	0.066	0	2.608	1.595	0	0	0	0	283.739	0.134	283.604	1	0.916236	1	1	No							0	0	No	0	0	Yes	6	12.016	71.2481	64.3769	147.641
353	2109	712	21	Costa de Oaxaca	Río Tonameca 2	Oaxaca	275.668							46.336	283.739	0.157	0	0	0.157	0.084	0	0	0	0	330.003	0	330.003	1	0.0475649	1	1	Yes						0.143849	0.143849	1	Yes	0.459033	1	Yes	5	13.8563	48.9502	45.1425	107.949
354	2110	683	21	Costa de Oaxaca	Río Copalita 1	Oaxaca	1335.59							570.274	0	3.613	0.002	0	3.615	2.099	0	0	0	0	568.759	0.912	567.847	1	0.633906	1	1	No							0	0	Yes	0.743234	1	Yes	29	21.5443	445.343	280.68	747.568
355	2111	706	21	Costa de Oaxaca	Río Copalita 2	Oaxaca	193.862							63.874	568.759	1.015	0	0	1.015	0.707	0	0	0	0	632.325	0	632.325	1	0.160441	1	1	No							0	0	Yes	5.65147	1	Yes	3	6.18343	22.0282	26.1482	54.3598
356	2112	707	21	Costa de Oaxaca	Río Coyula	Oaxaca	647.305							161.234	0	1.398	0	0	1.398	0.848	0	0	0	0	160.684	0	160.684	1	0.867063	1	1	Yes				64.9604			64.9604	1	Yes	411.327	1	Yes	12	62.3464	19.2715	189.584	271.202
357	2113	693	21	Costa de Oaxaca	Río Zimatán 1	Oaxaca	377.095							46.69	0	0.056	0	0	0.056	0.042	0	0	0	0	46.676	0.017	46.659	1	0.11994	1	1	No							0	0	No	0	0	Yes	10	170.545	68.0159	0.93999	239.5
358	2114	698	21	Costa de Oaxaca	Río Zimatán 2	Oaxaca	280.595							40.682	46.676	0.031	0	0	0.031	0.013	0	0	0	0	87.339	0	87.339	1	0.0354862	1	1	No							0	0	Yes	0.00294042	1	Yes	6	88.8442	87.1022	0	175.946
359	2115	695	21	Costa de Oaxaca	Río Ayuta 1	Oaxaca	205.362							25.54	0	0	0	0	0	0	0	0	0	0	25.54	0	25.54	1	0	1	1	No							0	0	No	0	0	Yes	3	16.638	55.43	0	72.0681
360	2116	699	21	Costa de Oaxaca	Río Ayuta 2	Oaxaca	392.507							49.623	25.54	0	0	0	0	0	0	0	0	0	75.163	0	75.163	1	0	1	1	No							0	0	Yes	0.0211593	1	Yes	4	0	26.8402	56.3427	83.1829
361	2117	688	21	Costa de Oaxaca	Río Astata 1	Oaxaca	165.982							28.655	0	0.987	0	0	0.987	0.61	0	0	0	0	28.278	0.091	28.187	1	3.44443	1	1	No							0	0	No	0	0	Yes	1	0	0	18.4161	18.4161
362	2118	681	21	Costa de Oaxaca	Río Astata 2	Oaxaca	364.499							63.126	28.278	0.296	0	0	0.296	0.214	0	0	0	0	91.322	0	91.322	1	0.323837	1	1	No							0	0	No	0	0	Yes	5	0	47.3167	83.2789	130.596
363	2119	678	21	Costa de Oaxaca	Río Mazatán	Oaxaca	953.218							148.106	0	0.03	0	0	0.03	0.022	0	0	0	0	148.097	0	148.097	1	0.0202558	1	1	No							0	0	No	0	0	Yes	8	17.3928	58.5276	106.574	182.494
364	2201	621	22	Tehuantepec	Río San Antonio	Oaxaca	4719.69							328.058	0	24.877	0.164	0	25.041	6.05	0	0	0	0	309.067	246.189	62.878	1	7.6331	1	1	No							0	0	No	0	0	Yes	45	33.135	209.587	947.36	1190.08
365	2202	665	22	Tehuantepec	Río San Tequisistlán	Oaxaca	2261.66							320.71	0	4.755	0	0	4.755	1.161	0	0	0	0	317.116	252.601	64.516	1	1.48265	1	1	No							0	0	No	0	0	Yes	40	375.304	216.303	444.547	1036.15
366	2203	626	22	Tehuantepec	Río Tehuantepec 1	Oaxaca	2567.92							664.706	626.183	683.35	0	0	683.35	1.342	0	0	75.021	-0.474	534.334	271.437	262.897	1	58.7112	0	0	No							0	0	No	0	0	Yes	54	510.112	352.707	455.81	1318.63
367	2204	667	22	Tehuantepec	Río Tehuantepec 2	Oaxaca	769.175							96.89	534.334	32.902	0	0	32.902	694.968	0	640.791	0	0	652.499	0	652.499	1	106.728	0	0	No							0	0	No	0	0	Yes	6	103.882	0	51.1809	155.063
368	2205	635	22	Tehuantepec	Río Los Perros 1	Oaxaca	980.712							143.692	0	0.733	0	0	0.733	0.448	0	0	0	0	143.407	73.196	70.211	1	0.510119	1	1	No							0	0	No	0	0	Yes	9	44.2621	60.1407	110.203	214.606
369	2206	664	22	Tehuantepec	Río Los Perros 2	Oaxaca	1066.48							153.254	143.407	374.47	0	0	374.47	74.957	362.047	0	0	0	359.196	0	359.196	1	126.228	0	0	No							0	0	No	0	0	Yes	5	84.4624	0.312656	44.6991	129.474
370	2207	650	22	Tehuantepec	Río Estancado	Oaxaca	593.211							88.47	0	0.004	0	0	0.004	0.003	0	0	0	0	88.469	0	88.469	1	0.00452131	1	1	No							0	0	No	0	0	Yes	5	24.031	38.0957	76.3116	138.438
371	2208	638	22	Tehuantepec	Río Espíritu Santo 1	Oaxaca	461.347							235.225	0	0.016	0.009	0	0.026	0.011	0	0	0	0	235.21	0.125	235.085	1	0.0106281	1	1	No							0	0	No	0	0	Yes	14	116.398	75.182	131.873	323.453
372	2209	653	22	Tehuantepec	Río Espíritu Santo 2	Oaxaca	169.733							28.63	235.21	0.14	0	0	0.14	0.094	0	0	0	0	263.794	0	263.794	1	0.0530625	1	1	No							0	0	No	0	0	Yes	2	0	2.4941	49.3259	51.82
373	2210	651	22	Tehuantepec	Río Cazadero	Oaxaca	599.703							121.638	0	0	0	0	0	0	0	0	0	0	121.638	0	121.638	1	0	1	1	No							0	0	No	0	0	Yes	8	6.99378	36.4814	161.733	205.208
374	2211	649	22	Tehuantepec	Río Niltepec 1	Oaxaca	95.1667							29.723	0	0.026	0	0	0.026	0.02	0	0	0	0	29.716	0	29.716	1	0.0874743	1	1	No							0	0	No	0	0	Yes	1	0	0.0179693	21.7901	21.8081
375	2212	658	22	Tehuantepec	Río Niltepec 2	Oaxaca	270.397							77.614	29.716	0	0	0	0	0	0	0	0	0	107.33	0	107.33	1	0	1	1	No							0	0	No	0	0	Yes	0	5.48241	0	19.6674	25.1498
376	2213	640	22	Tehuantepec	Río Ostuta 1	Oaxaca	482.821							464.94	0	0.034	0	0	0.034	0.026	0	0	0	0	464.931	0.566	464.365	1	0.00731277	1	1	No							0	0	No	0	0	Yes	10	6.70602	121.306	119.735	247.747
377	2214	644	22	Tehuantepec	Río Zanatepec	Oaxaca	274.198							99.04	0	0.108	0	0	0.108	0.022	0	0	0	0	98.954	0.121	98.833	1	0.109047	1	1	No							0	0	No	0	0	Yes	6	18.2314	84.8646	44.8262	147.922
378	2215	657	22	Tehuantepec	Río Ostuta 2	Oaxaca	800.231							246.648	563.885	0.949	0.039	0	0.988	0.5	0	0	0	0	810.045	0	810.045	1	0.121895	1	1	No							0	0	No	0	0	Yes	14	96.9763	45.3683	186.764	329.109
379	2301	669	23	Costa de Chiapas	Laguna Mar Muerto A	Oaxaca, Chiapas	641.996							200.694	0	16.998	0	0	16.998	16.536	0	0	0	0	200.232	0	200.232	1	8.46961	1	1	No							0	0	Yes	3.9421	1	Yes	11	136.257	64.7354	88.6992	289.692
380	2302	661	23	Costa de Chiapas	Tapanatepec	Oaxaca, Chiapas	323.453							131.03	0	2.061	0.253	0	2.314	0.685	0	0	0	0	129.401	0	129.401	1	1.76601	1	1	Yes					11.0815		11.0815	1	No	0	0	Yes	9	37.2552	84.8479	56.1469	178.25
381	2303	670	23	Costa de Chiapas	Laguna Mar Muerto B	Chiapas, Oaxaca	324.795							141.461	0	0.317	0	0	0.317	0.07	0	0	0	0	141.215	0	141.215	1	0.22409	1	1	No							0	0	Yes	20.497	1	Yes	1	12.997	5.68951	0	18.6866
382	2304	666	23	Costa de Chiapas	Las Arenas	Chiapas, Oaxaca	387.739							118.087	0	0.529	0	0	0.529	0.182	0	0	0	0	117.74	0	117.74	1	0.447975	1	1	Yes					188.816		188.816	1	Yes	5.91861	1	Yes	0	2.20292	0	26.0738	28.2767
383	2305	671	23	Costa de Chiapas	La Punta	Chiapas	229.365							80.967	0	1.766	0	0	1.766	1.273	0	0	0	0	80.474	0	80.474	1	2.18114	1	1	Yes					164.287		164.287	1	Yes	1.51506	1	Yes	5	19.6132	46.7302	58.059	124.402
384	2306	675	23	Costa de Chiapas	Laguna Mar Muerto C	Chiapas	518.479							221.659	0	0.392	0	0	0.392	0.156	0	0	0	0	221.423	0	221.423	1	0.176848	1	1	Yes					127.995		127.995	1	Yes	27.3391	1	Yes	8	36.5321	28.2731	141.75	206.555
385	2307	677	23	Costa de Chiapas	Sanatenco	Chiapas	294.217							167.035	0	9.75	0	0	9.75	6.921	0	0	0	0	164.205	0	164.205	1	5.8371	1	1	Yes		0.205823			143.208	1.70183	145.115	1	Yes	52.0572	1	Yes	7	75.4536	6.07475	96.5459	178.074
386	2308	684	23	Costa de Chiapas	Laguna de La Joya	Chiapas	671.774							369.117	0	0.246	0	0	0.246	0.126	0	0	0	0	368.998	0	368.998	1	0.0666455	1	1	Yes		1.06044			69.3856	0.407727	70.8537	1	Yes	278.806	1	Yes	18	90.811	164.513	150.464	405.788
387	2309	696	23	Costa de Chiapas	Jesús	Chiapas	357.787							292.878	0	0.113	0	0	0.113	0.073	0	0	0	0	292.838	0	292.838	1	0.0385826	1	1	Yes		0.109939					0.109939	1	Yes	43.107	1	Yes	8	81.3674	48.65	71.0833	201.101
388	2310	700	23	Costa de Chiapas	El Porvenir	Chiapas	457.048							336.672	0	1.557	0.015	0	1.571	0.667	0	0	0	0	335.767	0	335.767	1	0.466923	1	1	Yes		0.535721					0.535721	1	No	0	0	Yes	10	42.7341	23.1432	194.356	260.234
389	2311	702	23	Costa de Chiapas	San Diego	Chiapas	225.957							163.36	0	0.361	0	0	0.361	0.093	0	0	0	0	163.092	0	163.092	1	0.220984	1	1	Yes		0.204707			5.40582		5.61053	1	Yes	4.41557	1	Yes	5	13.2639	62.5155	47.8792	123.659
390	2312	701	23	Costa de Chiapas	Pijijiapan	Chiapas	352.813							450.398	0	0.464	0	0	0.464	0.348	0	0	0	0	450.282	0	450.282	1	0.10302	1	1	Yes		0.906252			81.7395		82.6457	1	Yes	22.1618	1	Yes	9	43.6728	58.7919	91.8278	194.292
391	2313	709	23	Costa de Chiapas	Margaritas y Coapa	Chiapas	861.451							855.429	0	83.395	0	0	83.395	83.2	0	0	0	0	855.235	0	855.235	1	9.74891	1	1	Yes		0.313146			293.449		293.762	1	Yes	218.855	1	Yes	13	98.9888	152.227	87.2411	338.457
392	2314	713	23	Costa de Chiapas	Novillero Alto	Chiapas	462.174							850.029	0	10.298	0.484	0	10.782	2.296	0	0	0	0	841.543	0	841.543	1	1.26843	1	1	Yes					198.818		198.818	1	Yes	59.1166	1	Yes	8	14.4876	138.215	60.9097	213.613
393	2315	714	23	Costa de Chiapas	Sesecapa	Chiapas	489.301							532.769	0	1.002	0	0	1.002	0.674	0	0	0	0	532.441	0	532.441	1	0.188074	1	1	Yes					170.293		170.293	1	Yes	77.2027	1	Yes	9	75.6662	44.0015	109.782	229.449
394	2316	715	23	Costa de Chiapas	Cacaluta	Chiapas	644.418							1025.27	0	25.168	0	0	25.168	6.104	0	0	0	0	1006.2	0	1006.2	1	2.45477	1	1	Yes					226.212		226.212	1	Yes	136.004	1	Yes	15	174.559	169.544	52.794	396.896
395	2317	716	23	Costa de Chiapas	Laguna del Viejo y Temblader	Chiapas	450.457							738.23	0	178.656	0.334	0	178.991	169.194	0	0	0	0	728.434	0	728.434	1	24.2458	0	0	Yes					104.194		104.194	1	Yes	43.3234	1	Yes	15	171.266	68.3047	109.401	348.971
396	2318	717	23	Costa de Chiapas	Despoblado	Chiapas	1050.53							1558.22	0	22.232	0.022	0	22.254	5.742	0	0	0	0	1541.7	0	1541.7	1	1.42817	1	1	Yes					341.805		341.805	1	Yes	341.826	1	Yes	25	316.901	115.064	171.394	603.358
397	2319	718	23	Costa de Chiapas	Huixtla	Chiapas	822.564							1099.49	0	16.486	0.272	0	16.757	6.457	0	0	0	0	1089.46	0	1089.46	1	1.52416	1	1	Yes					92.334		92.334	1	Yes	92.3551	1	Yes	15	113.319	97.3836	195.689	406.392
398	2320	720	23	Costa de Chiapas	Huehuetán	Chiapas	841.828							1575.33	0	120.045	0.498	0	120.543	30.184	0	0	0	0	1484.97	0	1484.97	1	7.65194	1	1	Yes					138.064		138.064	1	Yes	138.088	1	Yes	18	115.571	96.3317	224.446	436.348
399	2321	719	23	Costa de Chiapas	Coatán	Chiapas	377.014							456.47	292.39	570.23	0.016	0	570.246	501.345	0	0	0	0	679.959	0	679.959	1	76.1485	0	0	Yes					26.5185		26.5185	1	Yes	11.0732	1	Yes	10	66.7921	44.3867	146.454	257.633
400	2322	724	23	Costa de Chiapas	Puerto Madero	Chiapas	401.59							311.012	0	19.688	0	0	19.688	3.997	0	0	0	0	295.32	0	295.32	1	6.3303	1	1	No							0	0	Yes	34.4268	1	Yes	7	27.229	25.6476	110.49	163.367
401	2323	722	23	Costa de Chiapas	Cahuacán	Chiapas	278.772							390.516	0	52.061	0.663	0	52.725	11.076	0	0	0	0	348.867	0	348.867	1	13.5011	0	0	Yes					11.6221		11.6221	1	Yes	3.46956	1	Yes	6	57.2482	3.20467	83.2654	143.718
402	2324	723	23	Costa de Chiapas	Cozoloapan	Chiapas	276.32							175.384	0	27.931	0.182	0	28.113	5.721	0	0	0	0	152.992	0	152.992	1	16.0294	0	0	No							0	0	Yes	21.2925	1	Yes	3	24.4901	0	73.7044	98.1945
403	2325	721	23	Costa de Chiapas	Suchiate	Chiapas	212.042							270.422	1293.61	247.572	0.32	0	247.892	50.563	0	0	0	0	1366.71	0	1366.71	1	15.8495	0	0	Yes					27.2355		27.2355	1	Yes	4.86373	1	Yes	6	45.733	34.1224	47.1594	127.015
415	2401	23	24	Bravo-Conchos	Río Bravo 1	Chihuahua	3323.7							70.642	0	60.597	64.854	0	125.451	99.386	78.3	0	0	0	122.878	140.002	-17.124	0	177.587	0	0	Yes	21.4779						21.4779	1	No	0	0	Yes	4	0	17.5777	77.8654	95.4431
416	2402	41	24	Bravo-Conchos	Río Bravo 2	Chihuahua	3591.67							20.572	122.878	1.246	0	0	1.246	0	0	0	0	0	142.204	162.195	-19.991	0	0.868595	1	0	No							0	0	No	0	0	Yes	18	115.026	124.546	161.861	401.434
404	2403	136	24	Bravo-Conchos	Río Florido 1	Chihuahua, Durango	1467.99							129.3	0	1.349	0	0	1.349	0	0	0	18.665	0	109.286	1295.16	-265.964	0	15.4787	0	0	No							0	0	No	0	0	Yes	30	31.0428	215.528	517.546	764.117
405	2404	145	24	Bravo-Conchos	Río Florido 2	Durango	1279.35							54.017	109.286	19.181	0	0	19.181	0	0	0	0	0	144.122	1295.16	-265.964	0	11.7457	0	0	No							0	0	No	0	0	Yes	23	50.1027	61.3934	456.161	567.657
406	2405	131	24	Bravo-Conchos	Río Florido 3	Durango, Chihuahua	4992.29							18.551	144.122	162.963	0	0	162.963	0	0	0	3.636	0	-3.925	1295.16	-265.964	0	102.413	0	0	No							0	0	No	0	0	Yes	36	254.838	75.003	555.88	885.721
407	2406	127	24	Bravo-Conchos	Río Parral	Chihuahua	1625.46							56.517	0	12.313	0	0	12.313	8.721	0	0	0	0	52.925	1295.16	-265.964	0	21.7864	0	0	No							0	0	No	0	0	Yes	5	58.4719	24.8226	58.5247	141.819
408	2407	144	24	Bravo-Conchos	Río Balleza	Chihuahua, Durango	1188.09							78.016	0	0.259	0	0	0.259	0	0	0	0	0	77.756	1295.16	-265.964	0	0.331983	1	0	No							0	0	No	0	0	Yes	19	43.7471	351.308	67.0046	462.059
409	2408	110	24	Bravo-Conchos	Río Conchos 1	Chihuahua ,Durango	19626.5							1044.54	77.756	772.102	0.48	0	772.582	0	0	0	193.543	0	156.17	1295.16	-265.964	0	86.0848	0	0	Yes	196.878						196.878	1	No	0	0	Yes	342	954.595	3977.99	3629.96	8562.55
411	2409	91	24	Bravo-Conchos	Río Conchos 2	Chihuahua	10855.2							409.145	268.245	2003.81	2.924	0	2006.74	1717.78	0	0	0	0	388.428	1295.16	-265.964	0	296.246	0	0	No							0	0	Yes	7.4313	1	Yes	70	430.392	250.005	1128.49	1808.89
413	2410	100	24	Bravo-Conchos	Río Conchos 3	Chihuahua	6565.98							72.194	392.489	239.895	0	0	239.895	62.756	0	0	51.32	0	236.224	1295.16	-265.964	0	62.6696	0	0	Yes				14.7352			14.7352	1	No	0	0	Yes	23	210.453	126.555	221.055	558.064
414	2411	99	24	Bravo-Conchos	Río Conchos 4	Chihuahua	8726.44							104.216	236.224	109.421	0	0	109.421	189	0	0	0	0	420.019	1295.16	-265.964	0	32.1411	0	0	No							0	0	No	0	0	Yes	51	262.484	448.455	581.241	1292.18
410	2412	85	24	Bravo-Conchos	Río San Pedro	Chihuahua	10650.9							372.331	0	268.591	0.341	0	268.932	0	0	0	44.248	0	59.15	1295.16	-265.964	0	84.1133	0	0	Yes				32.1768			32.1768	1	No	0	0	Yes	76	310.572	271.768	1329.08	1911.42
412	2413	63	24	Bravo-Conchos	Río Chuviscar	Chihuahua	419.535							6.78	0	0.102	0	0	0.102	0	0	0	2.617	0	4.061	1295.16	-265.964	0	40.1032	0	0	No							0	0	No	0	0	Yes	1	16.9385	0	2.53859	19.4771
417	2414	71	24	Bravo-Conchos	Río Bravo 3	Chihuahua	6095.7							26.767	562.223	18.814	0	0	18.814	1.849	0	0	0	0	572.024	1413.05	-571.495	0	3.19428	1	0	Yes	2355.75		5.21591				2360.97	1	No	0	0	Yes	44	313.294	328.464	463.041	1104.8
418	2415	65	24	Bravo-Conchos	Río Bravo 4	Coahuila de Zaragoza, Chihuahua	14659.2							193.899	572.024	2.007	0	0	2.007	0	0	0	0	0	763.916	1413.05	-571.495	0	0.262037	1	0	Yes	5898.06	238.795	9.03081				6145.88	1	No	0	0	Yes	52	106.809	299.643	923.991	1330.44
419	2416	66	24	Bravo-Conchos	Río Bravo 5	Coahuila de Zaragoza	6469.76							205.406	763.916	677.232	0	0	677.232	0	0	0	160.103	0	131.988	1413.05	-571.495	0	86.3836	0	0	Yes		15.6252	2.2015				17.8267	1	No	0	0	Yes	36	193.158	101.468	621.566	916.191
420	2417	73	24	Bravo-Conchos	Río Bravo 6	Coahuila de Zaragoza	219.937							12.104	131.988	3.73	0	0	3.73	677.232	0	0	0	0	817.594	1413.05	-571.495	0	2.58862	1	0	No							0	0	No	0	0	Yes	3	6.84028	12.9627	75.2151	95.018
421	2418	78	24	Bravo-Conchos	Arroyo de las Vacas	Coahuila de Zaragoza	868.375							17.277	0	0.01	0	0	0.01	0	0	0	0	0	17.267	1295.16	-265.964	0	0.0578804	1	0	Yes				0.425258			0.425258	1	No	0	0	Yes	9	21.0911	26.7414	172.334	220.166
422	2419	84	24	Bravo-Conchos	Río San Diego	Coahuila de Zaragoza	2127.59							206.812	0	47.025	0	0	47.025	0	0	0	3.987	0	155.8	1295.16	-265.964	0	24.6659	0	0	Yes		0.326762					0.326762	1	No	0	0	Yes	27	16.7945	57.2558	571.042	645.092
423	2420	75	24	Bravo-Conchos	Río Bravo 7	Coahuila de Zaragoza	362.441							37.429	990.661	20.278	0	0	20.278	0	0	0	0	0	1007.81	1413.05	-571.495	0	1.9724	1	0	No							0	0	No	0	0	Yes	3	27.4277	23.8512	52.2189	103.498
424	2421	93	24	Bravo-Conchos	Río San Rodrigo	Coahuila de Zaragoza	1907.01							120.152	0	1.885	0	0	1.885	0	0	0	4.504	0	113.763	1295.16	-265.964	0	5.31743	1	0	Yes		32.8046					32.8046	1	No	0	0	Yes	30	75.0014	335.569	342.796	753.367
425	2422	89	24	Bravo-Conchos	Río Bravo 8	Coahuila de Zaragoza	1200.69							8.906	1121.57	20.54	0	0	20.54	0	0	0	0	0	1109.94	1413.05	-571.495	0	1.81693	1	0	No							0	0	No	0	0	Yes	16	41.5321	47.3644	339.702	428.598
426	2423	98	24	Bravo-Conchos	Río Escondido	Coahuila de Zaragoza	2870.9							61.325	0	0.891	0	0	0.891	0	0	0	0	0	60.434	1295.16	-265.964	0	1.45291	1	0	Yes		7.34483					7.34483	1	Yes	1.78773	1	Yes	16	44.0552	13.6212	349.198	406.874
427	2424	97	24	Bravo-Conchos	Río Bravo 9	Coahuila de Zaragoza	3044.45							14.737	1170.37	54.569	0	0	54.569	0	0	0	0	0	1130.54	1413.05	-571.495	0	4.60455	1	0	No							0	0	Yes	361.906	1	Yes	38	5.94572	339.59	598.284	943.821
428	2425	108	24	Bravo-Conchos	Río Bravo 10	Nuevo León, Coahuila de Zaragoza, Tamaulipas	4012.27							85.999	1130.54	75.281	0	0	75.281	0	0	0	0	0	1141.26	1413.05	-571.495	0	6.18812	1	0	No							0	0	Yes	93.521	1	Yes	48	2.1229	87.3533	1165.62	1255.1
429	2426	92	24	Bravo-Conchos	Río Sabinas	Coahuila de Zaragoza	17059.5							378.784	0	30.089	0	0	30.089	0	0	0	0	0	348.695	1295.16	-265.964	0	7.94358	1	0	Yes	22.0871	7522.94					7545.03	1	Yes	2186.84	1	Yes	89	774.309	780.233	661.681	2216.22
430	2427	115	24	Bravo-Conchos	Río Nadadores	Coahuila de Zaragoza, Nuevo León	21596.5							113.945	0	63.404	0	0	63.404	0	0	0	0	0	50.542	1295.16	-265.964	0	55.6444	0	0	Yes	836.099	6601.54					7437.64	1	Yes	834.953	1	Yes	70	711.52	247.714	816.679	1775.91
431	2428	103	24	Bravo-Conchos	Río Salado	Nuevo León, Coahuila de Zaragoza, Tamaulipas	22927.1							333.385	399.237	322.509	0	0	322.509	9.055	0	0	157.251	0	261.917	1295.16	-265.964	0	65.4853	0	0	Yes		137.745					137.745	1	Yes	3354.36	1	Yes	231	1013.03	2158.18	2586.07	5757.28
432	2429	122	24	Bravo-Conchos	Río Bravo 11	Nuevo León, Tamaulipas	4173.12							37.127	1403.18	1627.93	0.3	0	1628.23	1624.26	0	0	163.049	0	1273.28	1413.05	-571.495	0	124.368	0	0	No							0	0	No	0	0	Yes	77	471.525	267.874	1216.03	1955.43
433	2430	139	24	Bravo-Conchos	Río Álamo	Nuevo León, Tamaulipas	4552.79							109.999	0	9.097	0	0	9.097	0	0	37	33.108	0	30.793	41.461	-10.668	0	72.0052	0	0	No							0	0	No	0	0	Yes	62	269.064	496.112	755.018	1520.19
434	2431	156	24	Bravo-Conchos	Río Salinas	Coahuila de Zaragoza, Nuevo León	9795.44							33.997	0	27.167	0.12	0	27.287	0	0	0	0	0	6.71	7.529	-0.818	0	80.263	0	0	Yes		259.125					259.125	1	No	0	0	Yes	9	125.003	0	108.406	233.409
435	2432	150	24	Bravo-Conchos	Río Pesquería	Nuevo León, Coahuila de Zaragoza	7761.79							103.52	6.71	153.457	0	0	153.457	0	99.862	0	0	0	56.635	82.257	-25.622	0	139.215	0	0	Yes		149.356		70.1202			219.476	1	No	0	0	Yes	78	724.555	375.832	869.137	1969.52
436	2433	169	24	Bravo-Conchos	Río San Juan 1	Nuevo León, Coahuila de Zaragoza	8618.17							774.68	0	600.712	0	0	600.712	99.862	139.193	104.19	127.179	0	181.654	263.835	-82.181	0	107.41	0	0	Yes		1542.78	59.8357	1687.06			3289.68	1	No	0	0	Yes	145	1172.56	511.886	1939.38	3623.83
437	2434	161	24	Bravo-Conchos	Río San Juan 2	Nuevo León	1613.76							25.893	238.289	24.138	0	0	24.138	0	4.328	0	0	0	244.372	365.848	-121.475	0	9.13688	1	0	Yes				0.0887014			0.0887014	1	No	0	0	Yes	27	162.4	260.862	252.644	675.906
438	2435	152	24	Bravo-Conchos	Río San Juan 3	Tamaulipas, Nuevo León	2916.56							221.82	244.372	552.661	0	0	552.661	0	37	0	200.665	0	-250.133	0	-250.133	0	161.591	0	0	Yes				0.00291014			0.00291014	1	No	0	0	Yes	62	313.821	176.452	1086.12	1576.39
439	2436	146	24	Bravo-Conchos	Río Bravo 12	Tamaulipas, Nuevo León	2175.52							105.598	872.353	1316.75	0	0	1316.75	0	0	0	0	0	-338.797	0	-338.797	0	134.643	0	0	No							0	0	No	0	0	Yes	34	169.809	112.86	530.579	813.248
440	2437	160	24	Bravo-Conchos	Río Bravo 13	Nuevo León, Tamaulipas	7734.52							23.868	0	96.307	0	0	96.307	55.035	0	0	0	0	-17.403	0	-17.403	0	403.498	0	0	Yes	952.966						952.966	1	No	0	0	Yes	165	1104.75	645.048	2321.43	4071.23
441	2501	208	25	San Fernando-Soto La Marina	Río Pilón 1	Nuevo León, Tamaulipas	242.506							63.008	0	1.688	0	0	1.688	0.358	0	0	0	0	61.678	61.678	0	0	2.67902	1	0	No							0	0	No	0	0	Yes	2	0	20.481	27.8711	48.3521
442	2502	210	25	San Fernando-Soto La Marina	Río Pilón 2	Nuevo León, Tamaulipas	2353.07							79.761	61.678	56.206	0.06	0	56.266	11.294	14	0	10.827	-20.4	120.04	120.04	0	0	33.0128	0	0	No							0	0	No	0	0	Yes	35	0	60.6197	787.972	848.592
443	2503	217	25	San Fernando-Soto La Marina	Río Blanco	Nuevo León, Tamaulipas	1750.8							132.488	0	24.942	0	0	24.942	24.938	0	0	0	0	132.484	132.484	0	0	18.8259	0	0	No							0	0	No	0	0	Yes	18	77.7478	5.67013	388.786	472.204
444	2504	220	25	San Fernando-Soto La Marina	Río San Antonio	Nuevo León, Tamaulipas	414.95							119.015	0	13.221	0	0	13.221	2.645	0	0	0	0	108.439	108.439	0	0	11.1087	0	0	No							0	0	No	0	0	Yes	5	0	0	145.548	145.548
445	2505	229	25	San Fernando-Soto La Marina	Río Purificación 1	Nuevo León, Tamaulipas	1217.75							249.998	240.923	81.523	0	0	81.523	16.327	0	14	2.66	1.5	407.565	407.565	0	0	20.3053	0	0	No							0	0	No	0	0	Yes	15	81.8171	50.0014	207.683	339.502
446	2506	235	25	San Fernando-Soto La Marina	Río Purificación 2	Tamaulipas	278.301							118.041	407.565	47.612	0	0	47.612	9.847	0	0	0	0	487.841	487.841	0	0	9.0585	1	0	No							0	0	No	0	0	Yes	9	100.859	57.3162	66.9311	225.106
447	2507	237	25	San Fernando-Soto La Marina	Río Corona	Tamaulipas	1377.46							206.339	0	57.295	0	0	57.295	11.484	0	0	0	0	160.528	160.528	0	0	27.7674	0	0	No							0	0	No	0	0	Yes	21	56.7757	75.0021	410.71	542.488
448	2508	254	25	San Fernando-Soto La Marina	Arroyo Grande	Tamaulipas	1875.87							34.691	0	7.88	0	0	7.88	1.597	0	0	3.552	0.5	24.356	24.356	0	0	34.3951	0	0	Yes					246.316		246.316	1	No	0	0	Yes	11	27.6576	25.0007	224.365	277.024
449	2509	205	25	San Fernando-Soto La Marina	Área no aforada	Tamaulipas	4582.2							283.773	792.765	83.511	0	0	83.511	44.684	0	577.638	414.604	45.47	-0.001	0	-0.001	0	104.151	0	0	Yes					431.605		431.605	1	No	0	0	Yes	35	106.269	176.93	626.24	909.438
450	2510	238	25	San Fernando-Soto La Marina	Río Soto La Marina 1	Tamaulipas	118.741							16.297	0	220.937	0	0	220.937	44.987	220.937	0	1.676	0	59.608	5.926	53.682	1	1365.98	0	0	No							0	0	No	0	0	Yes	4	25.0007	28.4335	42.2809	95.715
451	2511	213	25	San Fernando-Soto La Marina	Río Soto La Marina 2	Tamaulipas	3362.57							284.28	59.608	36.424	0	0	36.424	7.645	268.4	0	1.551	1.5	580.458	22.154	558.304	1	11.479	0	0	Yes					279.247		279.247	1	No	0	0	Yes	17	66.7915	46.5684	281.427	394.787
452	2512	260	25	San Fernando-Soto La Marina	Río Palmas	Tamaulipas	1562.9							91.711	0	6.108	0	0	6.108	1.208	0	0	7.487	-0.4	79.724	3.043	76.681	1	14.3876	0	0	Yes					715.721		715.721	1	No	0	0	Yes	17	0	79.0107	354.457	433.467
453	2513	240	25	San Fernando-Soto La Marina	Río Soto La Marina 3	Tamaulipas	1366.07							89.766	660.182	28.865	0	0	28.865	6.346	0	0	0	0	727.429	0	727.429	1	3.84893	1	1	Yes	268.899				42.4489		311.348	1	No	0	0	Yes	15	78.1585	45.5197	234.338	358.016
454	2514	250	25	San Fernando-Soto La Marina	Laguna Morales	Tamaulipas	506.212							88.876	0	0.276	0	0	0.276	0.139	0	0	0	0	88.738	0	88.738	1	0.310545	1	1	Yes	169.42						169.42	1	No	0	0	Yes	12	55.5832	31.9996	243.537	331.12
455	2515	264	25	San Fernando-Soto La Marina	Tepehuajes	Tamaulipas	268.324							51.637	0	3.843	0	0	3.843	2.021	0	0	0	0	49.815	0	49.815	1	7.44234	1	1	Yes	39.0071						39.0071	1	No	0	0	Yes	8	0	187.75	3.56975	191.32
456	2516	271	25	San Fernando-Soto La Marina	Barra de Ostiones	Tamaulipas	120.66	San Fernando - Soto La Marina	6 de Junio de 2018	11.621				24.523	0	1.114	0	0	1.114	0.227	0	0	0	0	23.636	11.621	12.015	1	4.54267	1	1	Yes	1.57871					0.00830319	1.58701	1	Yes	0.00654511	1	Yes	2	0.755765	54.2128	8.93767	63.9062
457	2517	277	25	San Fernando-Soto La Marina	Barra Carrizos	Tamaulipas	113.638	San Fernando - Soto La Marina	6 de Junio de 2018	10.81	6 de Junio de 2018	0.005		21.602	0	0.016	0	0.005	0.021	0.009	0	0	0	0	21.59	10.81	10.78	1	0.0740672	1	1	Yes						0.229796	0.229796	1	Yes	0.085941	1	Yes	3	9.09883	67.9409	0.22628	77.266
458	2518	278	25	San Fernando-Soto La Marina	Barra de San Vicente	Tamaulipas	133.836	San Fernando - Soto La Marina	6 de Junio de 2018	12.432				27.194	0	0.004	0	0	0.004	0.002	0	0	0	0	27.192	12.432	14.76	1	0.0147091	1	1	Yes						0.272287	0.272287	1	Yes	0.213253	1	Yes	5	61.3782	71.7544	0.703856	133.836
459	2519	268	25	San Fernando-Soto La Marina	Río San Rafael 1	Tamaulipas	451.995							82.137	0	0.58	0	0	0.58	0.172	0	8.62	10.207	-0.261	63.163	6.942	56.221	1	23.3098	0	0	Yes					219.926		219.926	1	No	0	0	Yes	6	0	25.2222	128.813	154.036
460	2520	276	25	San Fernando-Soto La Marina	Río San Rafael 2	Tamaulipas	641.393							93.853	63.163	2.637	0	0	2.637	0.558	8.62	0	0	0	163.558	15.63	147.928	1	1.67945	1	1	Yes					159.397		159.397	1	No	0	0	Yes	13	52.159	104.577	221.24	377.976
461	2521	283	25	San Fernando-Soto La Marina	Río San Rafael 3	Tamaulipas	447.91							68.804	163.558	11.409	12.452	0	23.861	17.334	0	0	0	0	225.834	0	225.834	1	10.2689	1	1	No							0	0	No	0	0	Yes	17	25.8446	230.995	112.361	369.201
462	2522	288	25	San Fernando-Soto La Marina	Río Tigre 1	Tamaulipas	504.93							95.853	0	10.097	0	0	10.097	2.726	0	0	0	0	88.482	17.132	71.35	1	10.5338	0	0	Yes					109.909		109.909	1	No	0	0	Yes	17	91.5417	178.991	160.627	431.16
463	2523	291	25	San Fernando-Soto La Marina	Río Tigre 2	Tamaulipas	647.517							48.763	88.482	32.438	0.007	0	32.445	30.32	0	0	0	0	135.12	0	135.12	1	23.6402	0	0	No							0	0	No	0	0	Yes	18	21.3722	173.824	257.543	452.739
464	2524	285	25	San Fernando-Soto La Marina	Río Barberena 1	Tamaulipas	1310.26							62.389	0	5.723	0.622	0	6.345	1.364	0	0	0	0	57.408	8.878	48.53	1	10.1701	1	1	Yes					158.107		158.107	1	No	0	0	Yes	26	55.4856	273.576	299.915	628.977
465	2525	301	25	San Fernando-Soto La Marina	Río Barberena 2	Tamaulipas	631.063							81.269	57.408	23.74	0	0	23.74	14.83	0	0	0	0	129.768	0	129.768	1	17.1189	0	0	No							0	0	No	0	0	Yes	12	0	76.4757	221.42	297.895
466	2526	290	25	San Fernando-Soto La Marina	Laguna San Andrés	Tamaulipas	285.752							35.707	0	0.038	0	0	0.038	0.01	0	0	0	0	35.679	0	35.679	1	0.106422	1	1	No							0	0	No	0	0	Yes	6	0	4.23559	158.862	163.098
467	2527	309	25	San Fernando-Soto La Marina	Laguna Las Marismas	Tamaulipas	183.258							26.417	0	0.052	0.003	0	0.055	0.041	0	0	0	0	26.403	0	26.403	1	0.208199	1	1	No							0	0	No	0	0	Yes	1	24.3773	0	0	24.3773
468	2528	193	25	San Fernando-Soto La Marina	Río Potosí 1	Nuevo León	1128.67	San Fernando - Soto La Marina	6 de Junio de 2018	16.338	6 de Junio de 2018	1.316		93.688	0	4.282	0	1.316	5.598	0.856	0	0	0	0	88.946	87.451	1.496	1	4.57049	1	1	Yes		0.57718					0.57718	1	No	0	0	Yes	22	87.3536	50.0013	356.067	493.422
469	2529	195	25	San Fernando-Soto La Marina	Río Potosí 2	Nuevo León	472.106	San Fernando - Soto La Marina	6 de Junio de 2018	10.808	6 de Junio de 2018	0.215		58.067	88.946	19.959	0.6	0.215	20.774	4.11	0	71.242	0	0	59.108	56.567	2.541	1	62.4441	0	0	No							0	0	No	0	0	Yes	8	0.809066	0	194.131	194.94
470	2530	199	25	San Fernando-Soto La Marina	Río Camacho	Nuevo León	431.927	San Fernando - Soto La Marina	6 de Junio de 2018	14.839	6 de Junio de 2018	0.682		88.426	0	3.958	0	0.682	4.64	0.792	0	0	0	0	84.578	83.223	1.354	1	4.47606	1	1	No							0	0	No	0	0	Yes	7	60.5107	53.1122	83.8946	197.517
471	2531	202	25	San Fernando-Soto La Marina	Río Pablillo 1	Tamaulipas, Nuevo León	974.971	San Fernando - Soto La Marina	6 de Junio de 2018	20.358				110.999	0	1.256	0	0	1.256	0.251	0	0	0	0	109.994	108.233	1.761	1	1.13154	1	1	No							0	0	No	0	0	Yes	20	33.8819	70.998	346.628	451.507
472	2532	197	25	San Fernando-Soto La Marina	Río Pablillo 2	Nuevo León	169.873	San Fernando - Soto La Marina	6 de Junio de 2018	30.909	6 de Junio de 2018	9.192		71.834	194.572	19.138	0	9.192	28.33	3.828	0	141.237	0.031	0	100.636	96.309	4.327	1	60.2111	0	0	No							0	0	No	0	0	Yes	4	29.4038	8.21396	74.0135	111.631
473	2533	198	25	San Fernando-Soto La Marina	Arroyo Los Anegados o Conchos 2	Nuevo León, Tamaulipas	1471.5	San Fernando - Soto La Marina	6 de Junio de 2018	10.476				57.269	0	16.712	0	0	16.712	3.347	0	0	0	0	43.904	42.016	1.888	1	29.1816	0	0	No							0	0	Yes	5.56892	1	Yes	10	37.4455	2.34216	227.396	267.184
474	2534	190	25	San Fernando-Soto La Marina	Río Conchos	Tamaulipas, Nuevo León	949.705	San Fernando - Soto La Marina	6 de Junio de 2018	61.0774				89.347	203.648	24.328	0	0	24.328	4.868	0	47.812	0	0	225.722	212.916	12.807	1	24.6216	0	0	No							0	0	No	0	0	Yes	14	24.5582	49.954	277.673	352.185
475	2535	168	25	San Fernando-Soto La Marina	Río San Lorenzo	Nuevo León, Tamaulipas	4555.81	San Fernando - Soto La Marina	6 de Junio de 2018	85.039	6 de Junio de 2018	0.077		289.524	0	0.881	0	0.077	0.958	0.205	2.044	0	0	0	290.815	274.315	16.5	1	0.304293	1	1	No							0	0	No	0	0	Yes	52	113.179	0	1186	1299.17
476	2536	192	25	San Fernando-Soto La Marina	Río Burgos	Tamaulipas	508.883	San Fernando - Soto La Marina	6 de Junio de 2018	8.776	6 de Junio de 2018	0.005		50.083	0	1.558	0	0.005	1.563	0.375	0	0	0	0	48.895	46.121	2.774	1	3.11084	1	1	No							0	0	No	0	0	Yes	9	24.818	14.2107	177.932	216.96
477	2537	183	25	San Fernando-Soto La Marina	Río San Fernando 1	Tamaulipas, Nuevo León	4239.91	San Fernando - Soto La Marina	6 de Junio de 2018	385.648	6 de Junio de 2018	3.818		414.696	565.432	3.775	0	3.818	7.593	0.833	0	575.862	0	0	397.506	341.85	55.656	1	59.1389	0	0	No							0	0	No	0	0	Yes	56	50.1581	85.8392	1266.82	1402.81
478	2538	203	25	San Fernando-Soto La Marina	Arroyo Chorreras o Las Norias	Tamaulipas	1754.21	San Fernando - Soto La Marina	6 de Junio de 2018	70.846				169.235	0	4.954	0.3	0	5.254	4.355	0	0	0	0	168.336	144.767	23.569	1	3.10456	1	1	No							0	0	No	0	0	Yes	18	57.1661	86.9735	327.469	471.609
479	2539	194	25	San Fernando-Soto La Marina	Río San Fernando 2	Tamaulipas	998.471	San Fernando - Soto La Marina	6 de Junio de 2018	550				84.797	565.842	12.204	0	0	12.204	3.096	0	0	0	0	641.531	550	91.531	1	1.87569	1	1	Yes	219.003						219.003	1	Yes	219.001	1	Yes	22	214.124	182.593	159.546	556.263
480	2540	172	25	San Fernando-Soto La Marina	Laguna Madre Norte	Nuevo León, Tamaulipas	4995.07	San Fernando - Soto La Marina	6 de Junio de 2018	82.171				165.313	0	1.334	0	0	1.334	0.341	0	0	0	0	164.319	82.171	82.148	1	0.806954	1	1	Yes	1101.24						1101.24	1	Yes	1028.14	1	Yes	82	233.11	399.57	1396.54	2029.22
481	2541	196	25	San Fernando-Soto La Marina	Barra Jesús María	Tamaulipas	1236.62	San Fernando - Soto La Marina	6 de Junio de 2018	46.725	6 de Junio de 2018	0.219		99.846	0	2.704	0	0.219	2.923	2.607	0	0	0	0	99.531	46.725	52.806	1	2.70817	1	1	Yes	374.72						374.72	1	Yes	219.501	1	Yes	25	245.119	93.7141	240.991	579.824
482	2542	214	25	San Fernando-Soto La Marina	Arroyos Chapote-Temascal	Tamaulipas	501.412							46.393	0	3.312	0	0	3.312	3.312	0	0	0	0	46.393	0	46.393	1	7.13901	1	1	Yes	16.074						16.074	1	No	0	0	Yes	10	88.9184	67.9196	117.217	274.055
483	2543	219	25	San Fernando-Soto La Marina	Arroyos Olivares-Paxtle	Tamaulipas	508.535							44.635	0	1.484	0	0	1.484	0.331	0	0	0	0	43.482	0	43.482	1	3.32475	1	1	Yes	150.077						150.077	1	No	0	0	Yes	16	86.591	188.117	124.211	398.92
484	2544	218	25	San Fernando-Soto La Marina	Arroyos La Misión-Santa Rosa	Tamaulipas	1046.76							72.488	0	1.182	0	0	1.182	0.237	0	0	0	0	71.544	0	71.544	1	1.63061	1	1	Yes	62.8088						62.8088	1	No	0	0	Yes	7	1.36773	0	150.067	151.435
485	2545	227	25	San Fernando-Soto La Marina	Arroyos Calanche-Venados	Tamaulipas	942.8							64.915	0	1.18	0	0	1.18	0.238	0	0	0	0	63.973	0	63.973	1	1.81776	1	1	Yes	185.111						185.111	1	No	0	0	Yes	12	49.9609	59.0264	222.214	331.201
486	2601	442	26	Pánuco	Arroyo Zarco	Estado de México, Hidalgo	619.38	Pánuco	6 de Junio de 2018	0.109				40.034	0	28.036	0.007	0	28.043	5.82	0	0	27.872	1.122	-11.183	0	-11.183	0	142.471	0	0	No							0	0	No	0	0	Yes	1	17.6779	0	0	17.6779
487	2602	445	26	Pánuco	Río Ñado	Estado de México, Querétaro de Arteaga	499.856	Pánuco	6 de Junio de 2018	0				35.942	0	14.358	0	0	14.358	3.584	0	21.859	1.354	0.624	1.331	1.327	0.004	1	106.268	0	0	No							0	0	No	0	0	Yes	3	0	0	73.4928	73.4928
488	2603	429	26	Pánuco	Río Galindo	Querétaro de Arteaga, Michoacán de Ocampo	415.803	Pánuco	6 de Junio de 2018	0				43.822	0	20.661	0	0	20.661	4.502	0	21.135	6.147	2.454	-2.074	0	-2.074	0	115.004	0	0	No							0	0	No	0	0	Yes	0	0.130723	0	0	0.130723
489	2604	407	26	Pánuco	Río San Juan 1	Estado de México, Querétaro de Arteaga, Hidalgo	1887.02	Pánuco	6 de Junio de 2018	0.936				87.319	1.331	69.36	0	0	69.36	10.85	42.995	28.567	4.018	-0.003	40.553	40.133	0.419	1	114.994	0	0	No							0	0	No	0	0	Yes	3	27.1044	0	49.7173	76.8218
490	2605	420	26	Pánuco	Río Tecozautla	Estado de México, Hidalgo, Querétaro de Arteaga	1257.75	Pánuco	6 de Junio de 2018	0.421				71.351	0	35.292	0	0	35.292	6.969	2.684	0	0	0	45.713	45.162	0.551	1	49.4625	0	0	No							0	0	No	0	0	Yes	4	0	0	107.446	107.446
491	2606	404	26	Pánuco	Río San Juan 2	Querétaro de Arteaga, Hidalgo	463.188	Pánuco	6 de Junio de 2018	1.04				13.868	40.553	11.044	0	0	11.044	23.245	0	0	0	0	66.622	65.819	0.803	1	20.2936	0	0	No							0	0	No	0	0	Yes	3	25.0009	0	43.2661	68.2669
492	2607	732	26	Pánuco	Río Grande de Tulancingo	Hidalgo, Puebla	706.957	Pánuco	6 de Junio de 2018	2.668				49.04	0	60.063	0.232	0	60.295	19.176	0	0	0	0	7.921	5.841	2.08	1	122.951	0	0	No							0	0	No	0	0	Yes	4	99.2953	0	29.748	129.043
493	2608	426	26	Pánuco	Río Metztitlán 1	Hidalgo, Puebla, Veracruz-Llave	1180.67	Pánuco	6 de Junio de 2018	21.962				152.907	7.921	48.574	1.565	0	50.139	22.507	0	0	0	0	133.195	85.05	48.146	1	31.1755	0	0	Yes					226.851		226.851	1	No	0	0	Yes	17	128.638	25.0214	275.075	428.734
494	2609	422	26	Pánuco	Río Metzquititlán	Hidalgo, Veracruz-Llave	228.652	Pánuco	6 de Junio de 2018	4.855				32.37	0	0.851	0.013	0	0.864	0.405	0	0	0	0	31.91	20.376	11.534	1	2.66914	1	1	Yes					10.3542		10.3542	1	No	0	0	Yes	9	20.6069	45.2367	137.442	203.285
495	2610	406	26	Pánuco	Río Metztitlán 2	Hidalgo	714.525	Pánuco	6 de Junio de 2018	39.545				56.794	165.105	57.686	0.021	0	57.707	12.164	0	0	16.933	-1.35	160.774	76.168	84.606	1	33.0285	0	0	Yes					487.66		487.66	1	Yes	10.6128	1	Yes	16	251.691	83.1827	69.2902	404.164
496	2611	405	26	Pánuco	Río Amajaque	Hidalgo	1470.65	Pánuco	6 de Junio de 2018	16.855				92.028	0	15.654	0.016	0	15.67	8.813	0	0	0	0	85.171	40.35	44.821	1	17.0274	0	0	Yes				22.1708	224.506		246.677	1	No	0	0	Yes	18	91.4127	145.158	199.409	435.979
497	2612	382	26	Pánuco	Río Claro	Hidalgo, San Luis Potosí	763.896	Pánuco	6 de Junio de 2018	90.98				497.607	0	3.891	0.058	0	3.949	2.768	0	0	0	0	496.425	233.786	262.639	1	0.793598	1	1	No							0	0	No	0	0	Yes	18	79.0559	159.147	199.831	438.033
498	2613	383	26	Pánuco	Río Amajac	Hidalgo, San Luis Potosí	1756.53	Pánuco	6 de Junio de 2018	267.672				850.486	245.945	5.669	0.187	0	5.856	3.076	0	0	0	0	1093.65	515.043	578.608	1	0.534097	1	1	Yes				99.2397	3.92506		103.165	1	No	0	0	Yes	26	128.317	248.317	289.468	666.103
499	2614	389	26	Pánuco	Río Calabozo	Hidalgo, Veracruz-Llave	1481.77	Pánuco	6 de Junio de 2018	217.763				1172.37	0	8.144	0.015	0	8.159	5.515	0	0	0	0	1169.72	680.018	489.705	1	0.695943	1	1	No							0	0	No	0	0	Yes	34	188.585	348.531	314.745	851.862
500	2615	385	26	Pánuco	Río Los Hules	Hidalgo, Veracruz-Llave	1269.97	Pánuco	6 de Junio de 2018	182.411				1006.34	0	6.245	0.427	0	6.672	4.243	0	0	0	0	1003.91	583.621	420.286	1	0.662999	1	1	Yes					0.0452874		0.0452874	1	No	0	0	Yes	41	343.241	411.206	278.756	1033.2
501	2616	372	26	Pánuco	Río Tempoal 1	Veracruz-Llave, Hidalgo	912.608	Pánuco	6 de Junio de 2018	442.767				248.204	2173.63	394.293	0.045	0	394.338	7.781	0	0	0	0	2035.28	1018.12	1017.16	1	16.2826	0	0	No							0	0	No	0	0	Yes	21	119.939	324.775	145.12	589.833
502	2617	368	26	Pánuco	Río San Pedro	Hidalgo, Veracruz-Llave, San Luis Potosí	646.304	Pánuco	6 de Junio de 2018	79.283				389.22	0	15.604	0.375	0	15.979	8.671	0	0	0	0	381.912	191.046	190.866	1	4.10539	1	1	No							0	0	No	0	0	Yes	18	87.2108	286.905	45.3588	419.475
503	2618	363	26	Pánuco	Río Tempoal 2	Veracruz-Llave, Hidalgo, San Luis Potosí	964.055	Pánuco	6 de Junio de 2018	572.955				281.419	2417.19	181.794	0.669	0	182.462	7.103	0	0	0	0	2523.25	1171.03	1352.22	1	6.76137	1	1	No							0	0	No	0	0	Yes	21	196.93	207.17	135.744	539.843
504	2619	314	26	Pánuco	Río Verde 1	San Luis Potosí	2003.01	Pánuco	6 de Junio de 2018	4.165				34.36	0	7.166	0.015	0	7.181	1.871	0	0	0	0	29.049	21.294	7.755	1	20.8993	0	0	Yes	95.2899			19.3012			114.591	1	No	0	0	Yes	31	96.2885	323.63	381.302	801.22
505	2620	300	26	Pánuco	Río Verde 2	San Luis Potosí	4130.58	Pánuco	6 de Junio de 2018	28.013				113.344	29.049	67.146	0.3	0	67.446	13.585	0	0	0	0	88.532	46.892	41.64	1	47.3661	0	0	No							0	0	No	0	0	Yes	80	934.336	634.922	475.708	2044.97
506	2621	317	26	Pánuco	Río Verde 3	San Luis Potosí, Querétaro de Arteaga	3020.05	Pánuco	6 de Junio de 2018	47.714				92.586	88.532	7.08	0.64	0	7.72	2.072	0	0	0	0	175.47	89.308	86.162	1	4.26241	1	1	Yes					23.1984		23.1984	1	No	0	0	Yes	47	265.959	267.892	615.605	1149.46
507	2622	351	26	Pánuco	Arroyo El Puerquito o San Bartolo	Guanajuato, San Luis Potosí	1270.1	Pánuco	6 de Junio de 2018	0.015				35.735	0	36.502	0.04	0	36.542	1.058	0	0	0	0	0.25	0.25	0.001	1	102.258	0	0	Yes	3.45275			86.5936			90.0464	1	No	0	0	Yes	26	166.799	274.877	202.451	644.126
508	2623	332	26	Pánuco	Arroyo Altamira	San Luis Potosí, Guanajuato	1714.53	Pánuco	6 de Junio de 2018	0.948				42.109	0.25	41.412	0	0	41.412	2.494	0	0	1.21	0.628	1.603	1.498	0.105	1	102.103	0	0	Yes	509.672			219.662			729.334	1	No	0	0	Yes	33	167.085	224.707	450.082	841.874
509	2624	340	26	Pánuco	Río Santa María 1	Guanajuato, San Luis Potosí	2533.09	Pánuco	6 de Junio de 2018	18.2				90.747	1.603	13.917	0.213	0	14.13	3.628	0	63.072	0	0	18.777	12.482	6.295	1	83.5972	0	0	Yes				55.0474	283.435		338.482	1	No	0	0	Yes	59	467.531	485.674	512.744	1465.95
510	2625	344	26	Pánuco	Río Santa María 2	Guanajuato, San Luis Potosí, Querétaro de Arteaga	2698.53	Pánuco	6 de Junio de 2018	42.045				122.431	18.777	14.394	0.36	0	14.754	10.379	0	0	0	0	136.833	86.012	50.821	1	10.4484	0	0	Yes				0.504521	1632.47		1632.97	1	No	0	0	Yes	53	141.294	540.273	606.916	1288.48
511	2626	345	26	Pánuco	Río Santa María 3	Querétaro de Arteaga, Guanajuato, San Luis Potosí	3900.77	Pánuco	6 de Junio de 2018	190.62	6 de Junio de 2018	158		636.946	136.833	34.491	0.122	157.482	192.094	14.711	0	0	0	0	596.397	303.545	292.851	1	4.47324	1	1	Yes					2755.18		2755.18	1	Yes	14.1972	1	Yes	74	450.325	769.559	632.425	1852.31
512	2627	336	26	Pánuco	Río Tamasopo 1	San Luis Potosí	297.376	Pánuco	6 de Junio de 2018	72.972				308.946	0	3.295	0.016	0	3.31	0.811	0	0	0	0	306.446	160.074	146.372	1	1.07171	1	1	No							0	0	No	0	0	Yes	4	48.4499	24.7481	25.6133	98.8113
513	2628	335	26	Pánuco	Río Tamasopo 2	San Luis Potosí	237.864	Pánuco	6 de Junio de 2018	151.125				345.772	306.446	17.918	0	0	17.918	4.87	0	0	0	0	639.17	325.316	313.855	1	2.74724	1	1	No							0	0	No	0	0	Yes	10	99.2023	36.369	36.9154	172.487
514	2629	316	26	Pánuco	Río Gallinas	San Luis Potosí	707.2	Pánuco	6 de Junio de 2018	96.637				403.248	0	12.552	0	0	12.552	2.877	0	0	0	0	393.573	200.315	193.258	1	3.11272	1	1	No							0	0	No	0	0	Yes	11	169.313	69.3027	132.094	370.71
515	2630	296	26	Pánuco	Río El Salto	San Luis Potosí, Tamaulipas	2371.9	Pánuco	6 de Junio de 2018	171.802				866.137	0	436.334	0.216	0	436.55	400.869	0	0	0	0	830.456	422.674	407.783	1	50.402	0	0	No							0	0	No	0	0	Yes	35	176.616	286.826	460.503	923.946
516	2631	295	26	Pánuco	Río Valles	Tamaulipas, San Luis Potosí	1760.49	Pánuco	6 de Junio de 2018	61.426				272.107	0	117.751	3.724	0	121.475	56.183	0	0	0	0	206.814	105.261	101.553	1	44.6424	0	0	Yes					129.01		129.01	1	No	0	0	Yes	38	194.896	468.354	264.132	927.381
517	2632	325	26	Pánuco	Río Tampaón 1	San Luis Potosí, Querétaro de Arteaga	1266.6	Pánuco	6 de Junio de 2018	1098.13				1680.42	2841.88	111.098	1.085	0	112.183	70.395	0	0	0	0	4480.51	2225.34	2255.17	1	2.48066	1	1	Yes					44.0089		44.0089	1	Yes	11.6381	1	Yes	21	244.887	143.889	141.652	530.428
518	2633	333	26	Pánuco	Río Choy	San Luis Potosí	118.496	Pánuco	6 de Junio de 2018	56.895				233.389	0	39.26	0	0	39.26	13.89	0	0	0	0	208.018	93.671	114.347	1	16.8217	0	0	No							0	0	No	0	0	Yes	4	49.1056	17.5618	18.0796	84.747
519	2634	350	26	Pánuco	Río Coy 1	San Luis Potosí	192.731	Pánuco	6 de Junio de 2018	201.411				923.725	0	8.632	0	0	8.632	2.703	0	0	0	0	917.796	474.966	442.829	1	0.934477	1	1	No							0	0	No	0	0	Yes	5	25.4079	19.149	66.8555	111.412
520	2635	347	26	Pánuco	Río Coy 2	San Luis Potosí	478.716	Pánuco	6 de Junio de 2018	232.599				131.418	917.796	42.618	1.2	0	43.818	9.251	0	0	0	0	1014.65	503.946	510.701	1	4.17627	1	1	No							0	0	No	0	0	Yes	11	165.403	5.85186	96.276	267.53
521	2636	339	26	Pánuco	Río Tampaón 2	San Luis Potosí	347.101	Pánuco	6 de Junio de 2018	1353.46				79.892	5495.16	469.668	2.244	0	471.912	19.357	0	0	0	0	5122.5	2306.67	2815.83	1	8.46471	1	1	No							0	0	No	0	0	Yes	3	37.6077	0	68.0981	105.706
522	2637	375	26	Pánuco	Río Victoria	Querétaro de Arteaga, Guanajuato	1343.62	Pánuco	6 de Junio de 2018	3.171				43.57	0	2.325	0.102	0	2.427	0.753	0	0	0	0	41.895	35.769	6.127	1	5.57035	1	1	Yes					187.422		187.422	1	No	0	0	Yes	4	0	7.00071	99.9038	106.904
523	2638	393	26	Pánuco	Río Tolimán	Querétaro de Arteaga, Guanajuato	1033.62	Pánuco	6 de Junio de 2018	2.079				28.761	0	10.637	0	0	10.637	2.826	0	0	0	0	20.949	17.886	3.064	1	36.9841	0	0	No							0	0	No	0	0	Yes	10	24.3894	0	217.062	241.451
524	2639	387	26	Pánuco	Río Extoraz	Guanajuato, Querétaro de Arteaga	1514.55	Pánuco	6 de Junio de 2018	15.383	6 de Junio de 2018	79		72.62	62.845	7.172	0.203	0	7.375	2.4	0	79	0	0	51.49	31.329	20.161	1	63.7619	0	0	Yes					624.46		624.46	1	No	0	0	Yes	18	202.066	106.945	163.556	472.566
525	2640	399	26	Pánuco	Embalse Zimapán	Hidalgo, Querétaro de Arteaga	737.959	Pánuco	6 de Junio de 2018	304.4				73.717	1030.44	989.433	0	0	989.433	2.219	0	47.304	36.997	-1.42	34.061	20.724	13.337	1	97.1162	0	0	No							0	0	No	0	0	Yes	8	0	65.7815	133.643	199.425
526	2641	386	26	Pánuco	Río Moctezuma 1	Querétaro de Arteaga, Hidalgo	836.551	Pánuco	6 de Junio de 2018	188.946	6 de Junio de 2018	158		49.086	85.551	131.902	0	158	289.902	986.249	0	0	0	0	830.984	392.094	438.891	1	97.9686	0	0	Yes					66.9356		66.9356	1	No	0	0	Yes	9	92.0384	59.444	81.5222	233.005
527	2642	378	26	Pánuco	Río Moctezuma 2	Hidalgo, Querétaro de Arteaga, San Luis Potosí	989.001	Pánuco	6 de Junio de 2018	344.575				807.92	830.984	2.649	0.152	0	2.801	1.919	0	0	0	0	1638.02	771.408	866.613	1	0.170907	1	1	Yes				133.708	182.083		315.791	1	No	0	0	Yes	13	131.697	77.8663	105.02	314.583
528	2643	370	26	Pánuco	Río Tancuilín	San Luis Potosí, Querétaro de Arteaga, Hidalgo	331.278	Pánuco	6 de Junio de 2018	89.614				384.719	0	3.804	0	0	3.804	2.614	0	0	0	0	383.53	180.619	202.911	1	0.988774	1	1	Yes					66.7279		66.7279	1	No	0	0	Yes	12	80.2903	97.6527	91.0954	269.038
529	2644	354	26	Pánuco	Río Huichihuayán	San Luis Potosí, Querétaro de Arteaga	991.252	Pánuco	6 de Junio de 2018	177.627				812.179	0	6.446	0	0	6.446	3.654	0	0	0	0	809.387	381.172	428.215	1	0.793667	1	1	Yes					307.099		307.099	1	No	0	0	Yes	6	104.558	38.0682	28.1378	170.764
530	2645	353	26	Pánuco	Río Moctezuma 3	San Luis Potosí, Hidalgo, Veracruz-Llave	1530.95	Pánuco	6 de Junio de 2018	1221.53				497.989	4421.01	60.362	2.78	0	63.141	25.657	0	0	0	0	4881.52	2265.49	2616.03	1	1.28363	1	1	No							0	0	No	0	0	Yes	40	267.921	439.157	288.023	995.101
531	2646	343	26	Pánuco	Río Moctezuma 4	Veracruz-Llave, San Luis Potosí	897.07	Pánuco	6 de Junio de 2018	1837.19				167.626	7404.77	189.409	1.591	0	191	39.003	0	0	0	0	7420.4	3341.42	4078.98	1	2.52232	1	1	No							0	0	No	0	0	Yes	19	58.0468	150.02	273.401	481.467
532	2647	241	26	Pánuco	Río Jaumave-Chihue	Tamaulipas, Nuevo León	3318.81	Pánuco	6 de Junio de 2018	10.967				146.244	0	38.463	0.168	0	38.631	8.05	0	0	0	0	115.663	97.175	18.488	1	26.4154	0	0	No							0	0	No	0	0	Yes	13	125.004	100.491	121.695	347.19
533	2648	263	26	Pánuco	Río Guayalejo 1	Tamaulipas	351.141	Pánuco	6 de Junio de 2018	36.347				266.448	115.663	0.179	0	0	0.179	0.038	0	0	0	0	381.969	320.885	61.084	1	0.046845	1	1	No							0	0	No	0	0	Yes	6	16.6687	96.9504	22.9292	136.548
534	2649	270	26	Pánuco	Río Guayalejo 2	Tamaulipas	1125.58	Pánuco	6 de Junio de 2018	48.607				122.883	381.969	166.485	1.681	0	168.166	25.519	0	0	0	0	362.205	277.389	84.816	1	33.31	0	0	Yes					422.96		422.96	1	No	0	0	Yes	6	10.3471	25.0007	96.5979	131.946
535	2650	273	26	Pánuco	Río Sabinas	Tamaulipas	606.117	Pánuco	6 de Junio de 2018	66.105				528.863	0	20.71	0.288	0	20.998	4.313	0	0	0	0	512.178	392.243	119.935	1	3.9704	1	1	No							0	0	No	0	0	Yes	7	56.346	3.05265	109.976	169.374
536	2651	281	26	Pánuco	Río Comandante 1	Tamaulipas	2477.08	Pánuco	6 de Junio de 2018	27.251				248.041	0	32.096	1.604	0	33.7	6.879	0	0	0	0	221.22	170.447	50.773	1	13.5865	0	0	No							0	0	No	0	0	Yes	42	191.325	286.431	580.444	1058.2
537	2652	293	26	Pánuco	Río Comandante 2	Tamaulipas	244.94	Pánuco	6 de Junio de 2018	132.455				686.673	221.22	17.405	0.712	0	18.117	3.719	0	0	0	0	893.495	684.269	209.226	1	1.9955	1	1	No							0	0	No	0	0	Yes	3	23.2065	38.1764	32.7879	94.1707
538	2653	303	26	Pánuco	Río Mante	Tamaulipas	68.5717	Pánuco	6 de Junio de 2018	19.307				132.032	0	0.966	0.067	0	1.034	0.21	0	0	0	0	131.208	100.484	30.725	1	0.782386	1	1	No							0	0	No	0	0	Yes	1	29.4836	23.2434	0	52.727
539	2654	279	26	Pánuco	Río Guayalejo 3	Tamaulipas	2318.03	Pánuco	6 de Junio de 2018	308.837				252.59	1899.09	485.142	3.168	0	488.311	104.921	0	0	28.501	0.11	1739.68	1211.26	528.419	1	24.0241	0	0	Yes					23.9909		23.9909	1	No	0	0	Yes	42	347.238	223.788	428.29	999.317
540	2655	282	26	Pánuco	Arroyo el Cojo	Tamaulipas	401.326	Pánuco	6 de Junio de 2018	5.742				38.479	0	10.863	0.006	0	10.869	2.769	0	0	0	0	30.379	21.151	9.227	1	28.2466	0	0	Yes					149.264		149.264	1	No	0	0	Yes	2	6.05243	31.0972	54.3176	91.4673
541	2656	312	26	Pánuco	Río Tantoán	Tamaulipas, San Luis Potosí, Veracruz-Llave	610.433	Pánuco	6 de Junio de 2018	12.882				104.683	0	26.512	0.372	0	26.884	5.702	0	0	0	0	83.501	48.277	35.224	1	25.6813	0	0	Yes					13.1776		13.1776	1	No	0	0	Yes	15	90.7353	157.424	102.668	350.827
542	2657	286	26	Pánuco	Río Guayalejo 4	Tamaulipas, San Luis Potosí, Veracruz-Llave	3061.09	Pánuco	6 de Junio de 2018	398.994				377.878	1770.06	521.94	3.16	0	525.1	69.93	0	0	95.386	0.402	1596.97	923.309	673.666	1	28.9063	0	0	Yes					99.0886		99.0886	1	No	0	0	Yes	44	129.598	416.925	588.916	1135.44
543	2658	305	26	Pánuco	Río Tamesí	Tamaulipas, San Luis Potosí, Veracruz-Llave	1953.54	Pánuco	6 de Junio de 2018	485.777				509.5	1680.48	419.335	18.928	0	438.263	167.598	0	0	421.68	0	1497.63	503.115	994.516	1	39.2672	0	0	No							0	0	No	0	0	Yes	36	327.336	392.505	191.12	910.962
544	2659	320	26	Pánuco	Río Moctezuma 5	San Luis Potosí, Veracruz-Llave, San Luis Potosí	1282.15	Pánuco	6 de Junio de 2018	3305.72				154.247	12750.9	896.223	9.832	0	906.055	23.361	0	97.908	0	0	11924.6	4817.77	7106.78	1	7.77955	1	1	Yes					32.6142		32.6142	1	No	0	0	Yes	21	143.895	96.5608	308.673	549.129
545	2660	352	26	Pánuco	Río Chicayán 1	Veracruz-Llave	1889.78	Pánuco	6 de Junio de 2018	58.594				315.676	0	3.969	0	0	3.969	2.215	0	37.223	52.268	-0.589	225.019	96.484	128.536	1	29.4197	0	0	No							0	0	No	0	0	Yes	38	45.3858	396.932	494.292	936.61
546	2661	330	26	Pánuco	Río Chicayán 2	Veracruz-Llave	1549.46	Pánuco	6 de Junio de 2018	144.39				254.675	225.019	71.384	3.01	0	74.394	15.214	37.223	0	0	0	457.737	153.772	303.965	1	15.5086	0	0	No							0	0	No	0	0	Yes	29	94.9939	390.249	267.168	752.411
547	2662	321	26	Pánuco	Río Pánuco 1	San Luis Potosí, Veracruz-Llave	1457.47	Pánuco	6 de Junio de 2018	3444.52				215.388	11924.6	349.49	4.813	0	354.304	72.837	97.908	788.4	119.413	0	11048.6	3711.66	7336.91	1	10.3964	1	1	No							0	0	No	0	0	Yes	30	147.513	322.009	230.183	699.706
548	2663	323	26	Pánuco	Arroyo Tamacuil o La Llave	Veracruz-Llave	1084.74	Pánuco	6 de Junio de 2018	50.283				190.257	0	3.011	0	0	3.011	0.685	0	0	0	0	187.93	63.133	124.797	1	1.5826	1	1	No							0	0	Yes	7.45414	1	Yes	22	200.23	170.526	200.859	571.615
549	2664	315	26	Pánuco	Río Pánuco 2	Tamaulipas, Veracruz-Llave	955.706	Pánuco	6 de Junio de 2018	4182				199.975	13191.9	100.534	2.567	0	103.101	35.098	0	0	225.552	0	13098.3	4182	8916.29	1	2.45413	1	1	No							0	0	No	0	0	Yes	30	305.32	309.013	99.6375	713.971
550	2665	497	26	Pánuco	Xochimilco	Ciudad de México, Morelos	506.813							47.001	0	7.512	0	0	7.512	110.008	0	0	0.604	0	148.892	148.809	0.083	1	17.2677	0	0	Yes	1.35343			8.05			9.40343	1	Yes	25.8582	1	Yes	9	94.3397	80.2407	38.4869	213.067
551	2666	487	26	Pánuco	Río La Compañía	Estado de México, Puebla, Ciudad de México	1154.19							69.496	0	5.931	0	0	5.931	97.15	0	0	0	0	160.714	160.624	0.09	1	8.5343	1	1	Yes				99.2172			99.2172	1	Yes	0.0694761	1	Yes	12	144.357	0	158.596	302.953
552	2667	455	26	Pánuco	Tochac-Tecocomulco	Hidalgo, Tlaxcala, Estado de México, Puebla,	1309.67							82.156	0	8.835	0	0	8.835	6.377	0	0	37.277	0	42.421	42.399	0.022	1	56.1274	0	0	Yes				0.668834			0.668834	1	Yes	35.3766	1	Yes	2	0	0	39.5935	39.5935
553	2668	444	26	Pánuco	Río de Las Avenidas de Pachuca	Hidalgo, Estado de México, Tlaxcala	2628.5							119.524	42.421	14.893	0	0	14.893	71.213	0	0	0	0	218.265	218.143	0.122	1	9.19633	1	1	Yes				2.96049			2.96049	1	No	0	0	Yes	0	5.93435	0	14.2757	20.21
554	2669	468	26	Pánuco	Texcoco	Estado de México, Tlaxcala, Hidalgo	1386.53							85.771	0	12.553	0.114	0	12.666	43.264	0	0	12.871	0	103.498	103.44	0.058	1	29.7746	0	0	Yes				30			30	1	No	0	0	Yes	13	183.033	12.5671	125.005	320.605
555	2670	731	26	Pánuco	Ciudad de México	Ciudad de México, Estado de México	1804.21							221.636	631.369	621.272	1.492	0	622.764	964.183	440.179	1167.98	27.521	0	439.102	437.841	1.262	1	213.16	0	0	Yes				43.8808			43.8808	1	No	0	0	Yes	17	133.091	83.2419	224.349	440.682
556	2671	465	26	Pánuco	Río Cuautitlán	Estado de México, Hidalgo	821.725							89.987	0	94.722	0	0	94.722	153.372	5.198	0	4.759	0	149.075	148.911	0.165	1	110.55	0	0	No							0	0	No	0	0	Yes	14	25.0009	169.176	162.062	356.239
557	2672	459	26	Pánuco	Presa Requena	Hidalgo, Estado de México	754.898							159.747	0	37.789	0.052	0	37.841	11.603	0	81.923	9.619	0	41.967	41.921	0.046	1	80.9924	0	0	No							0	0	No	0	0	Yes	17	1.1121	234.639	220.861	456.613
558	2673	447	26	Pánuco	Presa Endhó	Hidalgo, Estado de México	1342.89							102.79	191.042	141.109	0	0	141.109	40.417	1136.96	1054.41	16.413	-0.159	259.438	257.813	1.625	1	412.403	0	0	Yes				1.05769			1.05769	1	No	0	0	Yes	14	66.6555	2.18142	228.182	297.019
559	2674	443	26	Pánuco	Río Salado	Hidalgo, Estado de México	656.472							47.451	439.102	311.259	177.406	0	488.665	286.943	201.823	39.23	0	0	447.424	444.622	2.802	1	108.497	0	0	No							0	0	No	0	0	Yes	3	3.14357	0	74.9972	78.1407
560	2675	411	26	Pánuco	Río Actopan	Hidalgo	1289.65							36.108	0	9.114	375.429	0	384.543	80.802	326.019	15.258	0	0	43.128	42.858	0.27	1	1107.24	0	0	Yes				2.08065			2.08065	1	No	0	0	Yes	0	0	0	18.7433	18.7433
561	2676	418	26	Pánuco	Río Alfajayucan	Hidalgo, Estado de México	834.978							38.453	0	14.427	115.235	0	129.662	26.018	160.567	8.921	9.358	-0.65	77.748	76.81	0.938	1	383.042	0	0	No							0	0	No	0	0	Yes	3	6.45696	2.12364	61.7979	70.3785
562	2677	412	26	Pánuco	Río Tula	Hidalgo, Estado de México	1454.33							55.106	749.99	601.456	57.634	0	659.09	321.825	491.407	118.882	0	0	840.356	830.22	10.136	1	96.631	0	0	No							0	0	No	0	0	Yes	11	94.3978	16.6945	150.021	261.114
563	2701	329	27	Norte de Veracruz	Río Cucharas	Veracruz-Llave	721.375							209.55	0	1.897	0	0	1.897	1.296	0	0	0	0	208.949	0	208.949	1	0.905273	1	1	No							0	0	No	0	0	Yes	16	15.0196	88.6042	290.38	394.004
564	2702	355	27	Norte de Veracruz	Río Tancochín	Veracruz-Llave	632.824							156.644	0	4.906	0	0	4.906	3.18	0	0	0	0	154.918	0	154.918	1	3.13194	1	1	No							0	0	Yes	8.62234	1	Yes	17	70.1112	148.838	205.284	424.233
565	2703	359	27	Norte de Veracruz	Arroyo La Piedra o La Laja	Veracruz-Llave	318.149							59.117	0	0.317	0	0	0.317	0.122	0	0	0	0	58.921	0	58.921	1	0.536225	1	1	No							0	0	Yes	2.72923	1	Yes	3	23.4956	13.3077	48.6256	85.4289
566	2704	366	27	Norte de Veracruz	Arroyo Carbajal	Veracruz-Llave	188.519							43.142	0	0.751	0	0	0.751	0.206	0	0	0	0	42.597	0	42.597	1	1.74076	1	1	No							0	0	No	0	0	Yes	6	1.47686	53.8765	94.247	149.6
567	2705	371	27	Norte de Veracruz	Estero Galindo	Veracruz-Llave	1011.81							260.608	0	0.849	0.017	0	0.866	0.645	0	0	0	0	260.387	0	260.387	1	0.3323	1	1	No							0	0	Yes	70.5449	1	Yes	17	160.731	70.4343	171.528	402.693
568	2706	376	27	Norte de Veracruz	Río Tuxpan	Hidalgo, Veracruz-Llave, Puebla	5843.21							2068.74	0	38.232	1.603	0	39.836	20.649	0	0	0	0	2049.56	0	2049.56	1	1.92556	1	1	No							0	0	Yes	29.0776	1	Yes	110	296.489	527.965	1911.41	2735.87
569	2707	402	27	Norte de Veracruz	Río Cazones	Hidalgo, Veracruz-Llave, Puebla	2824.82							2077.14	0	77.455	0.286	0	77.741	50.57	0	165.028	0	0	1884.94	0	1884.94	1	11.6877	0	0	Yes		110.516					110.516	1	Yes	7.6802	1	Yes	60	266.57	126.9	1101.07	1494.54
570	2708	421	27	Norte de Veracruz	Río Tecolutla	Puebla, Hidalgo, Veracruz-Llave, Tlaxcala	7708.68				24 de junio de 2011			6181.09	0	2492.88	2.207	0.28	2495.36	2393.34	165.028	0	0	0	6244.1	0	6244.1	1	40.3664	0	0	Yes		307.831					307.831	1	Yes	5.19672	1	Yes	177	347.617	1034.63	3049.16	4431.41
571	2709	431	27	Norte de Veracruz	Río Nautla	Puebla, Veracruz-Llave	2933.35				24 de junio de 2011			2413.31	0	697.057	0.749	0.364	698.17	659.312	0	0	0	0	2374.45	0	2374.45	1	28.9149	0	0	Yes				39.4985			39.4985	1	No	0	0	Yes	73	228.889	350.897	1226.1	1805.88
572	2710	438	27	Norte de Veracruz	Río Misantla	Veracruz-Llave	571.792							667.711	0	4.974	0	0	4.974	3.556	0	0	0	0	666.293	0	666.293	1	0.744933	1	1	No							0	0	No	0	0	Yes	13	43.8308	86.7156	187.748	318.294
573	2711	441	27	Norte de Veracruz	Río Colipa	Veracruz-Llave	462.899							330.485	0	3.581	0	0	3.581	1.948	0	0	0	0	328.853	0	328.853	1	1.08356	1	1	No							0	0	No	0	0	Yes	7	59.3084	38.1984	64.4753	161.982
574	2712	394	27	Norte de Veracruz	Llanuras de Tuxpan	Puebla, Veracruz-Llave	1613.96							553.16	0	6.917	0.558	0	7.475	1.781	0	0	0	0	547.466	0	547.466	1	1.35133	1	1	No							0	0	Yes	6.13747	1	Yes	37	41.8414	419.887	460.148	921.876
575	2801	512	28	Papaloapan	Río Salado	Veracruz-Llave, Puebla, Oaxaca	6598.24	Papaloapan	6 de Junio de 2018	85.67	6 de Junio de 2018	50.844		422.222	0	111.917	0	50.494	162.41	26.828	137.396	0	0	0	424.035	383.704	40.332	1	26.5067	0	0	Yes				31.1916	3152.51		3183.7	1	No	0	0	Yes	109	910.204	308.905	1457.29	2676.4
576	2802	561	28	Papaloapan	Río Grande	Oaxaca	4918.52	Papaloapan	6 de Junio de 2018	276.83				896.041	0	53.533	0.351	0	53.884	16.314	0	0	0	0	858.471	776.819	81.652	1	6.01356	1	1	Yes					1412.07		1412.07	1	No	0	0	Yes	114	627.875	926.514	1315.33	2869.72
577	2803	562	28	Papaloapan	Río Trinidad	Oaxaca, Veracruz-Llave	5344.86	Papaloapan	6 de Junio de 2018	3911.04	6 de Junio de 2018	10.088		6327.6	0	7.805	0.003	1.063	8.871	4.173	0	0	0	0	6322.9	4840.01	1482.89	1	0.123396	1	1	No							0	0	No	0	0	Yes	132	484.074	757.986	2010.63	3252.69
578	2804	551	28	Papaloapan	Río Valle Nacional	Oaxaca	1414.86	Papaloapan	6 de Junio de 2018	2449.23	6 de Junio de 2018	0.8		3807.85	0	9.314	0	0.794	10.107	2.523	0	0	0	0	3800.26	2839.07	961.198	1	0.2446	1	1	No							0	0	No	0	0	Yes	38	494.087	112.155	287.247	893.489
579	2805	547	28	Papaloapan	Río Playa Vicente	Oaxaca, Veracruz-Llave	4673.6	Papaloapan	6 de Junio de 2018	4406.38	6 de Junio de 2018	4.082		6121.8	0	7.352	0.023	3.955	11.33	4.55	0	0	0	0	6115.02	4562.18	1552.84	1	0.120471	1	1	No							0	0	No	0	0	Yes	106	407.904	652.344	1567.32	2627.57
580	2806	540	28	Papaloapan	Río Santo Domingo	Oaxaca	2531.41	Papaloapan	6 de Junio de 2018	2426.92	6 de Junio de 2018	3.087		4786.78	1282.51	1030.54	0	3.087	1033.63	1028.71	0	3271.35	101.851	21.975	2669.18	1994.07	675.115	1	72.92	0	0	Yes					23.9281		23.9281	1	No	0	0	Yes	40	320.513	142.216	577.719	1040.45
581	2807	498	28	Papaloapan	Río Tonto	Oaxaca, Puebla, Veracruz-Llave	4813.46	Papaloapan	6 de Junio de 2018	3659.49	6 de Junio de 2018	20.642		8808.13	0	15441.8	72.349	20.642	15534.8	15288.5	3271.35	0	336.4	27.147	11469.6	8568.61	2901	1	180.262	0	0	No							0	0	No	0	0	Yes	65	361.707	73.4352	1208.97	1644.12
582	2808	500	28	Papaloapan	Río Blanco	Veracruz-Llave, Puebla	2922.48	Papaloapan	6 de Junio de 2018	1378.25	6 de Junio de 2018	38.636		2664.16	0	1486.93	0.813	36.022	1523.77	1358.03	0	186.801	0	0	2311.62	1723.21	588.408	1	62.8547	0	0	Yes				514.682			514.682	1	Yes	366.361	1	Yes	60	272.417	247.619	950.661	1470.7
583	2809	517	28	Papaloapan	Río San Juan	Veracruz-Llave	4542.41	Papaloapan	6 de Junio de 2018	5943.29	6 de Junio de 2018	9.846		2345.86	6322.9	654.655	0.372	8.187	663.213	614.112	0	0	66.763	0	8552.9	6375.81	2177.09	1	8.32633	1	1	Yes					257.037		257.037	1	Yes	121.016	1	Yes	92	457.756	215.992	1667.95	2341.7
584	2810	523	28	Papaloapan	Río Tesechoacán	Veracruz-Llave	1147.03	Papaloapan	6 de Junio de 2018	4856.92	6 de Junio de 2018	3.414		460.795	6115.02	12.229	0	3.414	15.643	7.155	0	0	0	0	6567.32	4895.65	1671.67	1	0.185969	1	1	No							0	0	Yes	49.2599	1	Yes	28	14.26	21.0488	593.384	628.693
585	2811	524	28	Papaloapan	Río Papaloapan	Veracruz-Llave, Oaxaca	2261.37	Papaloapan	6 de Junio de 2018	12802.4				1293.69	17939.1	121.56	0.75	0	122.31	53.217	0	0	0	0	19163.7	14285.7	4877.99	1	0.635946	1	1	No							0	0	Yes	61.0567	1	Yes	29	82.169	0	740.608	822.777
586	2812	502	28	Papaloapan	Llanuras de Papaloapan	Oaxaca, Veracruz-Llave	6420.84	Papaloapan	6 de Junio de 2018	29826.6	6 de Junio de 2018	0.664		4064.73	36595.5	491.776	0.495	0.664	492.935	109.399	186.801	0	211.679	0	40251.8	29826.6	10425.2	1	1.7313	1	1	Yes					1074.33		1074.33	1	Yes	2122.21	1	Yes	139	745.504	583.095	2039.33	3367.92
587	2813	467	28	Papaloapan	Río Actopan	Veracruz-Llave	1996.97	Actopan-Antigua	6 de Junio de 2018	256	6 de Junio de 2018	45.6	17 de Mayo 2022	834.655	0	425.316	0	45.6	470.916	117.01	120.722	0	0	0	601.472	256	345.472	1	50.9571	0	0	No							0	0	No	0	0	Yes	27	104.88	71.8011	476.148	652.829
588	2814	477	28	Papaloapan	Río La Antigua	Veracruz-Llave, Puebla	3477.99	Actopan-Antigua	6 de Junio de 2018	988.51	6 de Junio de 2018	51.33	17 de Mayo 2022	2152.78	0	356.04	0.198	51.214	407.452	120.073	0	120.722	0	0	1744.68	988.51	756.174	1	22.1555	0	0	Yes				42.7991			42.7991	1	Yes	7.16044	1	Yes	57	204.071	250.591	979.814	1434.48
589	2815	489	28	Papaloapan	Río Jamapa	Veracruz-Llave, Puebla	1987.13	Papaloapan	6 de Junio de 2018	189.93				588.912	0	178.302	0.046	0	178.347	107.595	0	0	0	0	518.16	380.657	137.503	1	30.2843	0	0	Yes				42.499			42.499	1	No	0	0	Yes	37	107.596	154.446	711.643	973.685
590	2816	495	28	Papaloapan	Río Cotaxtla	Veracruz-Llave, Puebla	1643.76	Papaloapan	6 de Junio de 2018	818.28	6 de Junio de 2018	11.404		1458.11	0	386.377	0.738	9.039	396.154	158.661	0	0	0	0	1220.61	896.702	323.912	1	26.5491	0	0	Yes				13.2853			13.2853	1	No	0	0	Yes	31	87.0105	186.921	482.617	756.548
591	2817	493	28	Papaloapan	Jamapa-Cotaxtla	Veracruz-Llave, Puebla	307.925	Papaloapan	6 de Junio de 2018	1250	6 de Junio de 2018	1.079		125.729	1738.77	414.154	0	1.079	415.233	402.257	0	0	0	0	1851.53	1250	601.526	1	22.2126	0	0	Yes				0.267415			0.267415	1	Yes	0.354319	1	Yes	4	70.5561	0	21.697	92.2531
592	2818	452	28	Papaloapan	Llanuras de Actopan	Veracruz-Llave	1250.19	Papaloapan	6 de Junio de 2018	105.6				261.05	0	6.615	0	0	6.615	3.109	0	0	0	0	257.544	105.6	151.944	1	2.534	1	1	No							0	0	Yes	14.0218	1	Yes	21	141.93	122.749	287.223	551.902
593	2901	553	29	Coatzacoalcos	Zanapa	Tabasco	425.231							286.815	0	2.83	0	0	2.83	0.751	0	0	0	0	284.737	1.978	282.759	1	0.986699	1	1	No							0	0	No	0	0	Yes	11	48.0936	57.2651	169.015	274.373
594	2902	560	29	Coatzacoalcos	Tancochapa Alto	Veracruz-Llave, Tabasco	1180.57							947.35	0	0.825	0	0	0.825	0.555	0	0	0	0	947.08	0.55	946.53	1	0.087085	1	1	No							0	0	No	0	0	Yes	17	55.9793	124.443	260.635	441.057
595	2903	564	29	Coatzacoalcos	Poza Crispín	Tabasco, Veracruz-Llave, Chiapas	1047.27							893.951	0	0.255	0	0	0.255	0.191	0	0	0	0	893.887	0.519	893.368	1	0.0285251	1	1	No							0	0	No	0	0	Yes	20	1.89176	179.601	314.238	495.732
596	2904	539	29	Coatzacoalcos	Coacajapa	Tabasco	926.476							570.57	284.737	5.491	0	0	5.491	2.173	0	0	0	0	851.989	0.466	851.522	1	0.641992	1	1	No							0	0	No	0	0	Yes	9	0.00223027	52.6574	189.673	242.333
597	2905	545	29	Coatzacoalcos	Tancochapa Bajo	Veracruz-Llave, Tabasco	468.466							260.406	1840.97	0.07	0	0	0.07	0.055	0	0	0	0	2101.36	1.151	2100.21	1	0.00333116	1	1	No							0	0	No	0	0	Yes	8	39.9293	48.2615	118.5	206.691
598	2906	535	29	Coatzacoalcos	Tonalá	Veracruz-Llave, Tabasco	1655.99							1130.69	2953.35	2.237	0	0	2.237	0.921	0	0	0	0	4082.72	0	4082.72	1	0.0547742	1	1	No							0	0	No	0	0	Yes	27	171.365	215.697	264.105	651.166
599	2907	526	29	Coatzacoalcos	Santa Anita	Tabasco	667.631							481.372	0	7.383	0	0	7.383	2.672	0	0	0	0	476.662	0	476.662	1	1.53374	1	1	No							0	0	No	0	0	Yes	5	34.6401	0	73.6531	108.293
600	2908	528	29	Coatzacoalcos	Laguna del Carmen	Tabasco	985.973							898.612	0	19.9	0	0	19.9	17.281	0	0	0	0	895.994	0	895.994	1	2.21453	1	1	No							0	0	No	0	0	Yes	16	150.368	73.0404	179.954	403.363
601	2909	522	29	Coatzacoalcos	Laguna Machona	Tabasco	796.059							542.397	0	3	0	0	3	2.383	0	0	0	0	541.779	0	541.779	1	0.5531	1	1	No							0	0	No	0	0	Yes	7	110.174	74.9983	22.573	207.745
602	2910	579	29	Coatzacoalcos	Alto Río Coatzacoalcos	Oaxaca, Veracruz-Llave	10652.5	Coatzacoalcos	23 de Marzo de 2018	8356.61	23 de Marzo de 2018	6.292		14622.8	0	8.82	0.069	5.236	14.126	6.075	0	0	0	0	14614.8	8388.63	6226.15	1	0.0607885	1	1	No							0	0	No	0	0	Yes	241	1703.18	1785.82	2552.3	6041.31
603	2911	549	29	Coatzacoalcos	Bajo Río Coatzacoalcos	Veracruz-Llave, Oaxaca	3719.2	Coatzacoalcos	23 de Marzo de 2018	6850.14	23 de Marzo de 2018	5.353		1766.12	14614.8	14.1	0	5.353	19.453	7.646	0	0	0	0	16369.1	9387.28	6981.8	1	0.0860759	1	1	No							0	0	No	0	0	Yes	34	25.001	25.001	813.193	863.195
604	2912	569	29	Coatzacoalcos	Alto Río Uxpanapa	Veracruz-Llave, Oaxaca, Chiapas	3315.56	Coatzacoalcos	23 de Marzo de 2018	3849.98				9031.73	0	1.036	0	0	1.036	0.776	0	0	0	0	9031.47	5205.6	3825.87	1	0.0114707	1	1	No							0	0	No	0	0	Yes	46	210.033	340.002	589.163	1139.2
605	2913	541	29	Coatzacoalcos	Bajo Río Uxpanapa	Veracruz-Llave	1938.31	Coatzacoalcos	23 de Marzo de 2018	4599.12	23 de Marzo de 2018	0.116		1840.63	9031.47	40.181	0	0.116	40.297	22.212	0	33.981	0	0	10820	6205.03	4615	1	0.682131	1	1	No							0	0	No	0	0	Yes	22	6.28592	74.7541	470.636	551.676
606	2914	531	29	Coatzacoalcos	Río Huazuntlán	Veracruz-Llave	1635.34	Coatzacoalcos	23 de Marzo de 2018	15419.2	23 de Marzo de 2018	23.107		1210.78	27189.1	145.185	20.613	19.932	185.73	92.387	33.981	11.826	0	0	28328.7	16161.6	12167.1	1	0.625439	1	1	Yes					158.876		158.876	1	No	0	0	Yes	23	12.565	74.9382	547.081	634.584
607	2915	532	29	Coatzacoalcos	Llanuras de Coatzacoalcos	Veracruz-Llave	301.866	Coatzacoalcos	23 de Marzo de 2018	16290	23 de Marzo de 2018	3.119		238.998	28328.7	18.842	0	3.119	21.961	12.756	11.826	0	0	0	28570.3	16290	12280.3	1	0.0659556	1	1	Yes					55.4414		55.4414	1	No	0	0	Yes	8	31.6068	61.4012	84.4457	177.454
610	3001	676	30	Grijalva-Usumacinta	Lagartero	Chiapas	534.956	Grijalva-Usumacinta	6 de Junio de 2018	24.98				158.807	0	4.417	0	0	4.417	1.579	0	0	0	0	155.969	155.949	0.02	1	2.78136	1	1	Yes				0.835799			0.835799	1	Yes	0.294028	1	Yes	2	3.49058	0	60.5801	64.0707
611	3002	704	30	Grijalva-Usumacinta	Yayahuita	Chiapas	966.96	Grijalva-Usumacinta	6 de Junio de 2018	88.31	6 de Junio de 2018	1.507		459.421	0	4.881	0	1.507	6.388	1.924	0	0	0	0	454.957	454.898	0.06	1	1.06242	1	1	Yes					277.985		277.985	1	No	0	0	Yes	17	15.3935	73.1487	304.532	393.075
612	3003	756	30	Grijalva-Usumacinta	Zacualpa	Chiapas	587.575	Grijalva-Usumacinta	6 de Junio de 2018	60.86				236.143	0	4.846	0	0	4.846	2.79	0	0	0	0	234.087	234.056	0.031	1	2.05215	1	1	No							0	0	No	0	0	Yes	6	21.8651	0.00028856	129.531	151.396
613	3004	710	30	Grijalva-Usumacinta	Papizaca	Chiapas	238.472	Grijalva-Usumacinta	6 de Junio de 2018	18.32				87.014	0	4.136	0	0	4.136	2.286	0	0	0	0	85.164	85.153	0.011	1	4.75326	1	1	No							0	0	No	0	0	Yes	4	0	0	81.9669	81.9669
614	3005	692	30	Grijalva-Usumacinta	Presa La Concordia	Chiapas	608.085	Grijalva-Usumacinta	6 de Junio de 2018	67.64	6 de Junio de 2018	0.752		316.576	0	1.804	0.682	0.752	3.238	0.516	0	0	0	0	313.854	313.82	0.034	1	0.785277	1	1	Yes		276.315			215.558		491.873	1	No	0	0	Yes	11	0.717685	26.1894	224.037	250.944
615	3006	690	30	Grijalva-Usumacinta	Selegua	Chiapas	811.432	Grijalva-Usumacinta	6 de Junio de 2018	530.44	6 de Junio de 2018	3.187		262.071	1526.54	89.896	0.179	3.187	93.262	18.99	0	0	0	0	1714.34	1714.12	0.227	1	5.03602	1	1	No							0	0	No	0	0	Yes	11	17.8978	0	246.082	263.979
616	3007	697	30	Grijalva-Usumacinta	San Miguel	Chiapas	1032.12	Grijalva-Usumacinta	6 de Junio de 2018	1277.6	6 de Junio de 2018	5.469		313.397	2987.13	14.395	0	5.38	19.774	8.754	0	0	0	0	3289.51	3289.07	0.435	1	0.436142	1	1	No							0	0	No	0	0	Yes	11	40.8501	25.0008	223.185	289.036
617	3008	680	30	Grijalva-Usumacinta	La Concordia	Chiapas	360.057	Grijalva-Usumacinta	6 de Junio de 2018	121.36	6 de Junio de 2018	1.259		167.92	313.854	87.889	0	1.259	89.148	17.766	0	0	0	0	410.392	410.338	0.054	1	18.2428	0	0	No							0	0	No	0	0	Yes	4	0	9.3124	113.269	122.581
618	3009	641	30	Grijalva-Usumacinta	Aguacatenco	Chiapas	2249.91	Grijalva-Usumacinta	6 de Junio de 2018	155.51	6 de Junio de 2018	9.447		512.855	0	171.892	0.653	9.426	181.971	40.269	0	0	0	0	371.153	371.104	0.049	1	33.644	0	0	No							0	0	No	0	0	Yes	6	25.0199	0	130.667	155.687
619	3010	691	30	Grijalva-Usumacinta	Aguzarca	Chiapas	576.804	Grijalva-Usumacinta	6 de Junio de 2018	66.58	6 de Junio de 2018	0.301		348.6	0	0.435	0	0.301	0.736	0.16	0	0	0	0	348.024	347.978	0.046	1	0.124785	1	1	No							0	0	No	0	0	Yes	10	0	50.0021	208.474	258.476
620	3011	672	30	Grijalva-Usumacinta	San Pedro	Chiapas	1050.97	Grijalva-Usumacinta	6 de Junio de 2018	229.3	6 de Junio de 2018	2.337		367.057	0	13.215	0.706	2.337	16.258	3.673	0	0	0	0	354.471	354.425	0.047	1	3.7926	1	1	Yes		500.782			38.7157		539.497	1	No	0	0	Yes	25	0	104.017	546.13	650.147
621	3012	687	30	Grijalva-Usumacinta	Grande o Salinas	Chiapas	738.921	Grijalva-Usumacinta	6 de Junio de 2018	130.19	6 de Junio de 2018	1.978		543.714	0	6.02	0.068	1.978	8.067	5.452	0	0	0	0	541.099	541.028	0.072	1	1.11971	1	1	Yes					96.9187		96.9187	1	No	0	0	Yes	19	0	125.494	343.411	468.905
622	3013	663	30	Grijalva-Usumacinta	Presa La Angostura	Chiapas	3267.48	Grijalva-Usumacinta	6 de Junio de 2018	3673.29	6 de Junio de 2018	3.493		5073.84	7028.99	9451.4	0.016	3.493	9454.91	50.218	0	0	837.552	0	1860.59	1858.98	1.607	1	85.0129	0	0	Yes		207.07			53.5536		260.623	1	No	0	0	Yes	39	198.199	76.9737	667.3	942.472
623	3014	612	30	Grijalva-Usumacinta	Hondo	Chiapas	489.442	Grijalva-Usumacinta	6 de Junio de 2018	36.06	6 de Junio de 2018	5.094		120.669	0	6.795	0	5.078	11.873	3.383	0	0	0	0	112.179	112.082	0.097	1	5.63111	1	1	Yes				9.87684			9.87684	1	Yes	9.62348	1	Yes	7	6.40192	12.9746	151.745	171.122
624	3015	619	30	Grijalva-Usumacinta	Tuxtla Gutiérrez	Chiapas	382.081	Grijalva-Usumacinta	6 de Junio de 2018	16.57	6 de Junio de 2018	100.656		66.249	0	5.223	0	100.478	105.701	3.244	0	0	0	0	-36.208	0	-36.208	0	7.88389	1	0	Yes				38.9311			38.9311	1	Yes	18.1313	1	Yes	4	27.2126	0	82.8863	110.099
625	3016	636	30	Grijalva-Usumacinta	Suchiapa	Chiapas	2041.02	Grijalva-Usumacinta	6 de Junio de 2018	109.26	6 de Junio de 2018	6.446		392.347	0	24.164	0.052	6.446	30.662	6.913	0	0	0	0	368.599	368.28	0.318	1	6.17209	1	1	Yes		200.697			400.671		601.368	1	No	0	0	Yes	26	7.07286	150.059	473.655	630.787
626	3017	642	30	Grijalva-Usumacinta	Santo Domingo	Chiapas	2061.68	Grijalva-Usumacinta	6 de Junio de 2018	159.57	6 de Junio de 2018	9.105		492.219	0	23.841	0.552	9.105	33.498	6.976	0	0	0	0	465.698	465.296	0.402	1	4.95572	1	1	Yes		599.224			278.391		877.615	1	No	0	0	Yes	21	1.3425	13.9538	540.28	555.577
627	3018	614	30	Grijalva-Usumacinta	Presa Chicoasén	Chiapas	2616.96	Grijalva-Usumacinta	6 de Junio de 2018	5350.79				1035.9	2807.06	12301.4	0.653	0	12302.1	10341.5	0	0	31.736	0	1850.64	1838.39	12.249	1	320.946	0	0	Yes				184.464			184.464	1	Yes	192.09	1	Yes	35	207.036	137.032	551.375	895.443
628	3019	592	30	Grijalva-Usumacinta	Chicoasén	Chiapas	956.155	Grijalva-Usumacinta	6 de Junio de 2018	102.34	6 de Junio de 2018	6.935		397.099	0	5.66	0.111	6.907	12.679	3.932	0	0	0	0	388.352	385.782	2.57	1	1.45329	1	1	Yes				0.466794			0.466794	1	Yes	0.490948	1	Yes	14	74.5846	11.0601	281.238	366.883
629	3020	615	30	Grijalva-Usumacinta	Encajonado	Chiapas, Oaxaca	1715.06	Grijalva-Usumacinta	6 de Junio de 2018	44.1	6 de Junio de 2018	0.162		304.595	0	0.725	0	0.162	0.887	0.304	0	0	0	0	304.013	300.434	3.579	1	0.238021	1	1	Yes					76.8658		76.8658	1	No	0	0	Yes	47	227.173	412.756	523.071	1163
630	3021	634	30	Grijalva-Usumacinta	Cintalapa	Chiapas, Oaxaca	1298.2	Grijalva-Usumacinta	6 de Junio de 2018	30.28	6 de Junio de 2018	5.48		176.638	0	16.185	0.521	5.465	22.17	4.257	0	0	0	0	158.725	156.856	1.868	1	9.45776	1	1	Yes					139.019		139.019	1	No	0	0	Yes	15	46.9322	81.1394	251.651	379.723
631	3022	648	30	Grijalva-Usumacinta	Soyatenco	Chiapas	1037.62	Grijalva-Usumacinta	6 de Junio de 2018	54.71	6 de Junio de 2018	0.534		184.861	0	5.256	0	0.534	5.79	1.26	0	0	0	0	180.331	178.208	2.123	1	2.84322	1	1	Yes					159.542		159.542	1	No	0	0	Yes	15	32.4925	47.8048	300.67	380.967
632	3023	598	30	Grijalva-Usumacinta	Alto Grijalva	Chiapas	302.622	Grijalva-Usumacinta	6 de Junio de 2018	4690.96	6 de Junio de 2018	0.651		92.353	2238.99	10945.7	0.05	0.651	10946.4	22210.6	0	0	0	0	13595.6	13433.1	162.438	1	469.503	0	0	No							0	0	No	0	0	Yes	2	0	0.460059	53.7543	54.2144
633	3024	608	30	Grijalva-Usumacinta	De La Venta	Chiapas	1367.69	Grijalva-Usumacinta	6 de Junio de 2018	270.03	6 de Junio de 2018	7.413		317.96	643.068	6.737	0.032	7.413	14.182	1.741	0	0	0	0	948.588	937.254	11.334	1	0.70435	1	1	Yes					419.073		419.073	1	No	0	0	Yes	14	54.8807	140.326	146.426	341.633
634	3025	594	30	Grijalva-Usumacinta	Chapopote	Chiapas, Veracruz-Llave, Oaxaca	599.376	Grijalva-Usumacinta	6 de Junio de 2018	41.96				174.466	0	9.513	0.319	0	9.832	5.249	0	0	0	0	169.884	167.854	2.03	1	5.63548	1	1	Yes					193.27		193.27	1	No	0	0	Yes	6	22.7895	0	110.812	133.602
635	3026	610	30	Grijalva-Usumacinta	Presa Nezahualcóyotl	Chiapas	1818.25	Grijalva-Usumacinta	6 de Junio de 2018	5441.63	6 de Junio de 2018	1.157		6236.24	14714	16717.9	0.044	1.104	16719.1	3.266	0	0	327.872	0	3906.58	3656.22	250.351	1	81.3634	0	0	Yes					326.492		326.492	1	No	0	0	Yes	28	143.99	34.4177	562.343	740.75
636	3027	588	30	Grijalva-Usumacinta	Tzimbac	Chiapas	251.479	Grijalva-Usumacinta	6 de Junio de 2018	128.57	6 de Junio de 2018	0.54		458.965	0	20.093	0	0.54	20.633	19.761	0	0	0	0	458.093	428.736	29.357	1	4.37789	1	1	No							0	0	No	0	0	Yes	4	0	10.5425	91.4274	101.97
637	3028	581	30	Grijalva-Usumacinta	Zayula	Chiapas	430.714	Grijalva-Usumacinta	6 de Junio de 2018	184.1				740.275	0	399.282	0.008	0	399.29	398.858	0	0	0	0	739.843	692.431	47.412	1	53.9381	0	0	No							0	0	No	0	0	Yes	5	0	56.4274	86.7309	143.158
638	3029	578	30	Grijalva-Usumacinta	Presa Peñitas	Chiapas, Tabasco, Veracruz-Llave	578.369	Grijalva-Usumacinta	6 de Junio de 2018	6231.93				2080.68	5104.51	19548.7	0	0	19548.7	16714.5	0	0	54.543	0	4296.46	2764.86	1531.6	1	272.828	0	0	No							0	0	No	0	0	Yes	9	1.07312	0	190.158	191.231
639	3030	559	30	Grijalva-Usumacinta	Paredón	Tabasco, Chiapas	387.296	Grijalva-Usumacinta	6 de Junio de 2018	220.89	6 de Junio de 2018	0.905		555.583	0	0.689	0	0.905	1.594	0.24	0	0	0	0	554.229	356.658	197.571	1	0.124014	1	1	No							0	0	No	0	0	Yes	8	0.198095	0	186.687	186.885
640	3031	568	30	Grijalva-Usumacinta	Platanar	Chiapas	440.275	Grijalva-Usumacinta	6 de Junio de 2018	286.86	6 de Junio de 2018	0.596		801.601	0	0.39	0	0.596	0.986	0.179	0	0	0	0	800.794	515.328	285.467	1	0.0486526	1	1	No							0	0	No	0	0	Yes	12	0	20.6367	300.755	321.392
641	3032	544	30	Grijalva-Usumacinta	Mezcalapa	Tabasco, Chiapas	694.161	Grijalva-Usumacinta	6 de Junio de 2018	9937.97	6 de Junio de 2018	0.747		819.434	5651.48	43.674	0	0.747	44.421	19567.9	0	0	0	0	25994.4	16712.1	9282.31	1	0.674928	1	1	No							0	0	No	0	0	Yes	14	38.4481	0	285.908	324.356
642	3033	520	30	Grijalva-Usumacinta	El Carrizal	Tabasco, Chiapas	1149.78	Grijalva-Usumacinta	6 de Junio de 2018	6753.81	6 de Junio de 2018	19.647		1038.25	12997.2	4.118	0	19.647	23.765	2.628	0	0	0	0	14014.3	12530.9	1483.42	1	0.02934	1	1	Yes					45.3945		45.3945	1	Yes	45.4066	1	Yes	26	475.722	55.1351	142.953	673.81
643	3034	521	30	Grijalva-Usumacinta	Tabasquillo	Tabasco	231.67	Grijalva-Usumacinta	6 de Junio de 2018	6954.6				288.966	14014.3	0.165	0	0	0.165	0.124	0	0	0	0	14303.3	12789.2	1514.02	1	0.00115358	1	1	Yes					115.746		115.746	1	Yes	115.749	1	Yes	4	65.5343	9.53564	55.7246	130.795
644	3035	533	30	Grijalva-Usumacinta	Cunduacán	Tabasco	377.738	Grijalva-Usumacinta	6 de Junio de 2018	99.97	6 de Junio de 2018	8.184		274.792	0	2.347	0	8.184	10.531	1.732	0	0	0	0	265.993	104.135	161.858	1	0.854101	1	1	No							0	0	No	0	0	Yes	2	8.41104	0	48.3259	56.7369
645	3036	527	30	Grijalva-Usumacinta	Samaría	Tabasco, Chiapas	686.375	Grijalva-Usumacinta	6 de Junio de 2018	5357.34	6 de Junio de 2018	16.054		475.112	13263.2	6.894	0	16.054	22.948	4.627	0	0	0	0	13720	5357.34	8362.66	1	0.0501808	1	1	No							0	0	No	0	0	Yes	13	79.5145	25.001	179.829	284.344
646	3037	519	30	Grijalva-Usumacinta	Caxcuchapa	Tabasco	509.043	Grijalva-Usumacinta	6 de Junio de 2018	134.13	6 de Junio de 2018	13.461		359.186	0	2.852	0	13.461	16.313	1.592	0	0	0	0	344.465	134.13	210.335	1	0.794018	1	1	No							0	0	No	0	0	Yes	3	56.0555	27.9595	29.8031	113.818
647	3038	571	30	Grijalva-Usumacinta	Basca	Chiapas	416.437	Grijalva-Usumacinta	6 de Junio de 2018	106.49	6 de Junio de 2018	0.991		432.744	0	1.214	0.091	0.991	2.296	0.967	0	0	0	0	431.415	385.997	45.418	1	0.301564	1	1	No							0	0	No	0	0	Yes	8	56.2387	25.001	115.75	196.99
648	3039	587	30	Grijalva-Usumacinta	Yashijá	Chiapas	560.844	Grijalva-Usumacinta	6 de Junio de 2018	129.88	6 de Junio de 2018	1.789		286.052	0	1.334	0.158	1.638	3.131	1.119	0	0	0	0	284.041	254.138	29.903	1	0.521583	1	1	Yes	16.9513						16.9513	1	No	0	0	Yes	11	39.0474	0	233.477	272.525
649	3040	583	30	Grijalva-Usumacinta	Shumulá	Chiapas	993.857	Grijalva-Usumacinta	6 de Junio de 2018	293.55	6 de Junio de 2018	10.657		742.014	0	6.9	0.264	10.516	17.68	5.352	0	0	0	0	729.686	652.867	76.819	1	0.96548	1	1	No							0	0	No	0	0	Yes	10	88.6147	2.58779	147.958	239.16
650	3041	567	30	Grijalva-Usumacinta	Puxcatán	Chiapas, Tabasco	683.118	Grijalva-Usumacinta	6 de Junio de 2018	210.18	6 de Junio de 2018	2.961		555.671	0	3.198	0.012	2.961	6.171	2.396	0	0	0	0	551.896	494.051	57.846	1	0.57768	1	1	No							0	0	No	0	0	Yes	13	0	31.3938	294.593	325.987
651	3042	593	30	Grijalva-Usumacinta	Chacté	Chiapas	1493.21	Grijalva-Usumacinta	6 de Junio de 2018	436.12	6 de Junio de 2018	13.35		879.178	0	11.425	0.207	13.164	24.797	8.56	0	0	0	0	862.941	772.313	90.629	1	1.32305	1	1	No							0	0	No	0	0	Yes	27	78.7825	11.0016	585.137	674.921
652	3043	600	30	Grijalva-Usumacinta	De los Plátanos	Chiapas	637.34	Grijalva-Usumacinta	6 de Junio de 2018	143.12	6 de Junio de 2018	2.814		298.431	0	8.33	0.392	2.766	11.488	6.381	0	0	0	0	293.324	262.518	30.806	1	2.92262	1	1	No							0	0	No	0	0	Yes	9	49.5841	0	180.588	230.172
653	3044	563	30	Grijalva-Usumacinta	Tulijá	Chiapas, Tabasco	1697.29	Grijalva-Usumacinta	6 de Junio de 2018	1613.91	6 de Junio de 2018	30.33		2204.96	1445.14	5.314	0.067	2.923	8.304	3.598	0	0	0	0	3645.39	3260.74	384.649	1	0.147421	1	1	Yes	8.50456			17.8111			26.3157	1	No	0	0	Yes	14	85.8325	0	327.669	413.501
654	3045	552	30	Grijalva-Usumacinta	Macuxpana	Tabasco, Chiapas	1165.51	Grijalva-Usumacinta	6 de Junio de 2018	795.66	6 de Junio de 2018	6.285		1278.87	551.896	5.433	0.548	6.263	12.245	4.605	0	0	0	0	1823.13	1630.76	192.37	1	0.326693	1	1	No							0	0	No	0	0	Yes	10	25.001	4.29415	215.035	244.33
655	3046	575	30	Grijalva-Usumacinta	Almendro	Chiapas, Tabasco	1045	Grijalva-Usumacinta	6 de Junio de 2018	1044.83	6 de Junio de 2018	6.879		876.492	1156.27	6.71	0.198	6.822	13.73	5.186	0	0	0	0	2024.21	1810.18	214.031	1	0.339834	1	1	No							0	0	No	0	0	Yes	23	59.5617	7.33301	499.402	566.297
656	3047	530	30	Grijalva-Usumacinta	Chilapa	Chiapas, Tabasco	2238.82	Grijalva-Usumacinta	6 de Junio de 2018	5103.28	6 de Junio de 2018	0.19		2790.34	5468.52	26.016	0	0.19	26.206	12.025	0	0	0	0	8244.69	7371.97	872.714	1	0.315007	1	1	Yes					663.17		663.17	1	Yes	665.245	1	Yes	39	234.442	154.585	587.112	976.139
657	3048	555	30	Grijalva-Usumacinta	Tacotalpa	Chiapas, Tabasco	504.223	Grijalva-Usumacinta	6 de Junio de 2018	1288.41	6 de Junio de 2018	1.344		527.507	2024.21	1.466	0	1.344	2.81	1.1	0	0	0	0	2550.01	2280.09	269.923	1	0.0574514	1	1	No							0	0	No	0	0	Yes	13	76.869	13.2631	244.874	335.006
658	3049	536	30	Grijalva-Usumacinta	Chilapilla	Tabasco	672.541	Grijalva-Usumacinta	6 de Junio de 2018	365.24	6 de Junio de 2018	5.824		654.847	0	1.135	0	5.824	6.959	0.87	0	0	0	0	648.759	580.087	68.672	1	0.173323	1	1	Yes					36.451		36.451	1	Yes	36.4502	1	Yes	15	44.2256	74.5401	220.274	339.04
659	3050	543	30	Grijalva-Usumacinta	De La Sierra	Chiapas, Tabasco	1074.66	Grijalva-Usumacinta	6 de Junio de 2018	833.31	6 de Junio de 2018	3.918		1516.15	0	21.235	0	3.896	25.13	8.371	0	0	0	0	1499.39	1340.68	158.713	1	1.40059	1	1	No							0	0	No	0	0	Yes	32	277.32	12.0177	449.605	738.943
660	3051	546	30	Grijalva-Usumacinta	Pichucalco	Tabasco, Chiapas	1239.13	Grijalva-Usumacinta	6 de Junio de 2018	1015.81	6 de Junio de 2018	13.746		1791.96	0	4.247	0.088	13.64	17.975	2.382	0	0	0	0	1776.36	1588.33	188.031	1	0.241914	1	1	No							0	0	No	0	0	Yes	25	209.401	49.5109	398.458	657.369
661	3052	542	30	Grijalva-Usumacinta	Viejo Mezcalapa	Tabasco, Chiapas	639.941	Grijalva-Usumacinta	6 de Junio de 2018	190.65	6 de Junio de 2018	10.356		477.696	0	2.239	0	10.356	12.595	0.712	0	0	0	0	465.813	416.506	49.307	1	0.468708	1	1	No							0	0	No	0	0	Yes	10	68.388	1.07058	205.971	275.429
662	3053	604	30	Grijalva-Usumacinta	Azul	Chiapas	1387.85	Grijalva-Usumacinta	6 de Junio de 2018	630.38	6 de Junio de 2018	13.914		638.382	0	5.714	0.34	13.891	19.945	3.607	0	0	0	0	622.044	599.884	22.16	1	0.948335	1	1	No							0	0	No	0	0	Yes	21	25.001	23.0571	459.145	507.203
663	3054	623	30	Grijalva-Usumacinta	Tzanconeja	Chiapas	2446.29	Grijalva-Usumacinta	6 de Junio de 2018	1108.76	6 de Junio de 2018	5.329		1113.08	0	7.161	0.009	5.224	12.394	4.472	0	0	0	0	1105.16	1065.79	39.371	1	0.644159	1	1	No							0	0	No	0	0	Yes	24	71.8748	1.97699	531.465	605.316
664	3055	611	30	Grijalva-Usumacinta	Perlas	Chiapas	751.051	Grijalva-Usumacinta	6 de Junio de 2018	496.02	6 de Junio de 2018	1.563		498.691	0	0.305	0.278	1.563	2.146	0.437	0	0	0	0	496.982	479.277	17.705	1	0.116906	1	1	Yes					190.371		190.371	1	No	0	0	Yes	9	12.69	37.5009	180.503	230.694
665	3056	662	30	Grijalva-Usumacinta	Comitán	Chiapas	785.795	Grijalva-Usumacinta	6 de Junio de 2018	280	6 de Junio de 2018	13.897		304.805	0	12.728	0.627	13.867	27.222	3.483	0	0	0	0	281.066	280	1.066	1	4.38149	1	1	Yes				37.1636			37.1636	1	Yes	38.2631	1	Yes	8	31.7734	24.5496	170.04	226.363
666	3057	652	30	Grijalva-Usumacinta	Margaritas	Chiapas	637.954	Grijalva-Usumacinta	6 de Junio de 2018	269.99	6 de Junio de 2018	3.815		283.652	0	9.415	0.143	3.815	13.372	2.518	0	0	0	0	272.797	269.99	2.807	1	3.36962	1	1	No							0	0	No	0	0	Yes	6	45.5873	0.451269	98.035	144.074
667	3058	597	30	Grijalva-Usumacinta	Jatate	Chiapas	1582.29	Grijalva-Usumacinta	6 de Junio de 2018	3182.87	6 de Junio de 2018	4.157		955.364	2224.18	131.112	0.124	0	131.236	98.199	0	0	0	0	3146.51	3029.74	116.769	1	4.1275	1	1	Yes	0.984794				79.8792		80.864	1	Yes	0.988143	1	Yes	23	25.001	81.3183	473.337	579.656
996	3059	674	30	Grijalva-Usumacinta	Ixcán	Chiapas	15.4047	Grijalva-Usumacinta	6 de Junio de 2018	3967.08	6 de Junio de 2018	0.027		14.818	3973.16	0.008	0	0.027	0.035	0.006	0	0	0	0	3987.95	3839.96	147.995	1	0.000200603	1	1	No							0	0	No	0	0	No					0
669	3060	673	30	Grijalva-Usumacinta	Chajul	Chiapas	15.6487	Grijalva-Usumacinta	6 de Junio de 2018	1925.56				14.594	1921.05	0	0	0	0	0	0	0	0	0	1935.65	1863.81	71.833	1	0	1	1	No							0	0	No	0	0	Yes	0	3.80234	0	7.11493	10.9173
670	3061	590	30	Grijalva-Usumacinta	Lacanjá	Chiapas	2023.36	Grijalva-Usumacinta	6 de Junio de 2018	1282.91	6 de Junio de 2018	3.239		1289.9	0	1.126	0.041	3.195	4.362	0.875	0	0	0	0	1286.41	1238.67	47.739	1	0.0904722	1	1	Yes	68.2191		42.4544		895.264		1005.94	1	Yes	68.1917	1	Yes	31	233.419	245.076	286.715	765.209
671	3062	628	30	Grijalva-Usumacinta	San Pedro	Chiapas	1475.64	Grijalva-Usumacinta	6 de Junio de 2018	1178.86	6 de Junio de 2018	0.027		1183.65	0	0.02	0.408	0.027	0.455	0.096	0	0	0	0	1183.29	1139.38	43.913	1	0.0361593	1	1	Yes					1474.71		1474.71	1	No	0	0	Yes	28	201.472	352.873	158.451	712.795
672	3063	646	30	Grijalva-Usumacinta	Laguna Miramar	Chiapas	386.064	Grijalva-Usumacinta	6 de Junio de 2018	325.13	6 de Junio de 2018	0.216		326.334	0	0.386	0	0.157	0.544	0.196	0	0	0	0	325.987	313.889	12.098	1	0.118284	1	1	Yes					386.064		386.064	1	No	0	0	Yes	4	1.21863	10.7396	60.5241	72.4824
673	3064	643	30	Grijalva-Usumacinta	Euseba	Chiapas	447.463	Grijalva-Usumacinta	6 de Junio de 2018	400.47	6 de Junio de 2018	0.436		400.786	0	0.22	0	0.436	0.656	0.165	0	0	0	0	400.295	385.44	14.855	1	0.0548921	1	1	No							0	0	No	0	0	Yes	7	0	22.3893	152.357	174.747
674	3065	647	30	Grijalva-Usumacinta	Caliente	Chiapas	262.94	Grijalva-Usumacinta	6 de Junio de 2018	284.52	6 de Junio de 2018	0.312		283.364	0	0.265	0	0.312	0.577	0.199	0	0	0	0	282.986	272.484	10.502	1	0.0935193	1	1	No							0	0	No	0	0	Yes	3	0	0	66.6947	66.6947
675	3066	656	30	Grijalva-Usumacinta	Seco	Chiapas	426.154	Grijalva-Usumacinta	6 de Junio de 2018	516.87	6 de Junio de 2018	0.037		513.974	0	1.408	0	0.037	1.445	1.056	0	0	0	0	513.585	494.526	19.059	1	0.273944	1	1	No							0	0	No	0	0	Yes	1	0	0	31.2576	31.2576
676	3067	654	30	Grijalva-Usumacinta	Santo Domingo	Chiapas	604.101	Grijalva-Usumacinta	6 de Junio de 2018	409.78	6 de Junio de 2018	2.156		412.866	0	1.963	0.005	2.15	4.117	1.091	0	0	0	0	409.839	394.63	15.209	1	0.476668	1	1	Yes				3.11823			3.11823	1	Yes	3.63784	1	Yes	10	38.8892	0	191.724	230.613
677	3068	627	30	Grijalva-Usumacinta	Lacantún	Chiapas	2601.42	Grijalva-Usumacinta	6 de Junio de 2018	16195				2023.77	14183.2	5.336	0.284	0	5.62	2.812	0	0	0	0	16204.2	15602.6	601.553	1	0.0346764	1	1	Yes				23.3688	803.392		826.761	1	Yes	22.1373	1	Yes	59	327.851	438.861	690.221	1456.93
678	3069	538	30	Grijalva-Usumacinta	San Pedro	Tabasco, Campeche	2111.13	Grijalva-Usumacinta	6 de Junio de 2018	2827.87	6 de Junio de 2018	0.317		1179.78	1967.78	4.39	0	0.317	4.707	1.157	0	0	0	0	3144.01	3027.29	116.716	1	0.139473	1	1	Yes	54.9424						54.9424	1	No	0	0	Yes	17	0	72.9602	335.418	408.378
679	3070	633	30	Grijalva-Usumacinta	Chixoy	Chiapas	1117.51	Grijalva-Usumacinta	6 de Junio de 2018	29021.4	6 de Junio de 2018	1.505		731.118	28444.1	2.872	0	1.505	4.377	0.617	0	0	0	0	29171.5	28088.5	1082.94	1	0.00984397	1	1	No							0	0	No	0	0	Yes	14	70.3701	89.2225	230.644	390.237
680	3071	572	30	Grijalva-Usumacinta	Chocaljah	Chiapas	971.95	Grijalva-Usumacinta	6 de Junio de 2018	583.23	6 de Junio de 2018	2.111		647.49	0	1.809	0.023	2.111	3.943	1.37	0	0	0	0	644.917	620.975	23.941	1	0.282939	1	1	Yes	3.09913				13.0047		16.1038	1	Yes	3.10474	1	Yes	13	18.0216	0.0145253	296.814	314.85
681	3072	558	30	Grijalva-Usumacinta	Chacamax	Tabasco, Chiapas	1375.03	Grijalva-Usumacinta	6 de Junio de 2018	1069.55	6 de Junio de 2018	9.791		1183.23	0	6.567	0	9.791	16.358	1.617	0	0	0	0	1168.49	1125.11	43.378	1	0.555006	1	1	No							0	0	Yes	54.3163	1	Yes	36	146.792	49.1846	645.506	841.483
682	3073	514	30	Grijalva-Usumacinta	Usumacinta	Tabasco, Campeche, Chiapas	6820.24	Grijalva-Usumacinta	6 de Junio de 2018	53070.4	6 de Junio de 2018	4.081		5246.93	53552.4	129.38	0.059	4.081	133.52	31.321	0	0	0	0	58697.1	56513.1	2183.99	1	0.220137	1	1	Yes	538.235		26.508		603.204		1167.95	1	Yes	963.693	1	Yes	104	506.921	409.191	1748.99	2665.1
683	3074	511	30	Grijalva-Usumacinta	Grijalva	Tabasco	1830.25	Grijalva-Usumacinta	6 de Junio de 2018	45498.8				1855.7	49054	61.865	0.208	0	62.073	44.774	0	0	0	0	50892.4	45498.8	5393.62	1	0.121928	1	1	Yes					659.137		659.137	1	Yes	659.122	1	Yes	43	439.235	241.78	390.246	1071.26
684	3075	516	30	Grijalva-Usumacinta	Palizada	Campeche, Tabasco	1269.44	Grijalva-Usumacinta	6 de Junio de 2018	18552	6 de Junio de 2018	0.605		943.663	19565.7	0.445	0	0.605	1.05	0.097	0	0	0	0	20508.4	20459	49.407	1	0.00216974	1	1	Yes	698.794				17.5292		716.323	1	Yes	716.201	1	Yes	27	218.176	206.038	253.886	678.1
685	3076	510	30	Grijalva-Usumacinta	San Pedro y San Pablo	Campeche, Tabasco	781.625	Grijalva-Usumacinta	6 de Junio de 2018	20599.7	6 de Junio de 2018	0.261		1103.8	19565.7	0.078	0	0.261	0.339	0.056	0	0	0	0	20669.2	20599.7	69.506	1	0.000377368	1	1	Yes	127.006				637.313		764.319	1	Yes	764.161	1	Yes	23	343.135	96.0298	117.89	557.055
686	3077	513	30	Grijalva-Usumacinta	Laguna del Este	Campeche	1001.41	Grijalva-Usumacinta	6 de Junio de 2018	1508.26	6 de Junio de 2018	0.077		589.906	20508.4	57.941	0	0.077	58.018	11.588	0	0	0	0	21051.9	21001	50.856	1	0.274624	1	1	Yes	374.162						374.162	1	Yes	374.154	1	Yes	27	180.227	138.825	302.01	621.061
687	3078	485	30	Grijalva-Usumacinta	Laguna de Términos	Campeche, Tabasco	2898.29	Grijalva-Usumacinta	6 de Junio de 2018	1508.26	6 de Junio de 2018	13.227		1715.61	0	0.008	0	13.227	13.235	0.001	0	0	0	0	1702.38	1508.26	194.115	1	0.000466307	1	1	Yes	910.08				5.84e-06		910.08	1	Yes	910.448	1	Yes	29	394.374	76.2873	211.062	681.723
688	3079	501	30	Grijalva-Usumacinta	Mamatel	Campeche	1155.56	Grijalva-Usumacinta	6 de Junio de 2018	603.44				695.641	0	4.475	0	0	4.475	1.373	0	0	0	0	692.539	603.441	89.098	1	0.643292	1	1	Yes	19.4777						19.4777	1	Yes	19.47	1	Yes	6	36.6064	0	116.318	152.925
689	3080	505	30	Grijalva-Usumacinta	Cumpan	Tabasco, Campeche	3005.34	Grijalva-Usumacinta	6 de Junio de 2018	1523.9	6 de Junio de 2018	0.503		1676.76	0	1.25	0	0.503	1.753	0.323	0	0	0	0	1675.33	1523.9	151.43	1	0.0745485	1	1	Yes	284.028						284.028	1	Yes	284.045	1	Yes	46	167.838	255.328	670.458	1093.62
690	3081	506	30	Grijalva-Usumacinta	Laguna del Pom y Atasta	Campeche, Tabasco	1196.1	Grijalva-Usumacinta	6 de Junio de 2018	1109.51	6 de Junio de 2018	0.88		1240.39	0	0.095	0	0.88	0.975	0.079	0	0	0	0	1239.5	1109.51	129.988	1	0.00765886	1	1	Yes	869.882				307.042		1176.92	1	Yes	1176.3	1	Yes	41	915.364	80.6714	65.9079	1061.94
608	3082	503	30	Grijalva-Usumacinta	Alto Río Candelaria	Tabasco, Campeche	9651.6							1441.54	260.59	2.296	0	0	2.296	0	0	0	0	0	1699.38	221.785	1477.6	1	0.13489	1	1	Yes					2640.58		2640.58	1	No	0	0	Yes	105	325.013	443.602	1834.99	2603.6
609	3083	504	30	Grijalva-Usumacinta	Bajo Río Candelaria	Campeche	1474.81							239.27	1699.38	209.929	0.893	0	210.822	0	0	0	0	0	1685.64	0	1685.64	1	10.8747	0	0	Yes	20.1841						20.1841	1	Yes	20.1777	1	Yes	22	85.3673	108.642	385.881	579.89
691	3101	734	31	Yucatán Oeste	Río Champotón 1	Campeche	256.647							602.013	0	2.089	0	0	2.089	0	0	0	0	0	599.924	0.465	599.46	1	0.347002	1	1	No							0	0	No	0	0	Yes	3	0	24.9699	50.7951	75.765
692	3102	733	31	Yucatán Oeste	Río Champotón 2	Campeche	407.517							116.197	599.924	0.554	0	0	0.554	0	0	0	0	0	715.567	0	715.567	1	0.0773612	1	1	No							0	0	No	0	0	Yes	8	53.3931	49.2963	118.649	221.338
693	3103	436	31	Yucatán Oeste	Campeche	Yucatán	733.924							0	0	0	0	0	0	0	0	0	0	0	0	0	0	0	N/A	0	0	Yes					0.143361		0.143361	1	Yes	0.146586	1	Yes	14	76.0652	75.0027	217.256	368.324
694	3104	457	31	Yucatán Oeste	Arroyo Siho	Yucatán	628.755							5.306	0	0.002	0	0	0.002	0	0	0	0	0	5.304	0	5.304	1	0.0376932	1	1	No							0	0	No	0	0	Yes	7	14.0179	0.707177	106.931	121.657
695	3105	424	31	Yucatán Oeste	Calakmul	Yucatán	15242.5							3.814	0	0.004	0	0	0.004	0	0	0	0	0	3.81	0	3.81	1	0.104877	1	1	Yes					2520.02		2520.02	1	No	0	0	Yes	131	148.457	647.8	2532.21	3328.47
696	3106	474	31	Yucatán Oeste	Vicente Guerrero	Yucatán	672.731							0	0	0	0	0	0	0	0	0	0	0	0	0	0	0	N/A	0	0	No							0	0	No	0	0	Yes	4	0	25.0301	72.4586	97.4887
697	3107	476	31	Yucatán Oeste	La Malinche	Yucatán	3590.58							7.554	0	0.001	0	0	0.001	0	0	0	0	0	7.553	0	7.553	1	0.013238	1	1	No							0	0	Yes	0.654383	1	Yes	14	75.0028	68.8114	192.281	336.095
698	3201	322	32	Yucatán Norte	Yucatán	Campeche, Yucatán, Quintana Roo	54847.6							0.259	0	0.015	0	0	0.015	0	0	0	0	0	0.244	0	0.244	1	5.79151	1	1	Yes	562.784			13.3653	2274.59	3.83195	2854.57	1	Yes	3476.05	1	Yes	295	3773.47	877.206	2471.23	7121.9
699	3202	436	32	Yucatán Norte	Río Verde	Campeche	433.57							22.079	0	0	0	0	0	0	0	0	0	0	22.079	0	22.079	1	0	1	1	Yes					154.412		154.412	1	Yes	154.558	1	Yes	8	88.7408	44.1919	53.8401	186.773
700	3301	488	33	Yucatán Este	Río Escondido	Campeche, Quintana Roo	4522.51							612.007	0	0.469	0	0	0.469	0	0	0	0	0	611.538	0	611.538	1	0.0766331	1	1	Yes					539.951		539.951	1	No	0	0	Yes	61	154.315	312.991	1035.16	1502.47
701	3302	499	33	Yucatán Este	Agua Dulce	Quintana Roo	654.309							96.497	0	0.001	0	0	0.001	0	0	0	0	0	96.496	0	96.496	1	0.0010363	1	1	No							0	0	No	0	0	Yes	5	32.0306	0	59.1053	91.1359
702	3303	499	33	Yucatán Este	Arroyo Azul	Canpeche, Quintana Roo	2558.08							282.746	0	0.01	0	0	0.01	0	0	0	0	0	282.736	0	282.736	1	0.00353674	1	1	Yes					301.938		301.938	1	No	0	0	Yes	44	187.017	154.265	729.146	1070.43
703	3304	460	33	Yucatán Este	Laguna Bacalar	Quintana Roo	5192.3							76.203	0	0.422	0	0	0.422	0	0	0	0	0	75.781	0	75.781	1	0.553784	1	1	No							0	0	No	0	0	Yes	36	236.877	164.232	527.841	928.95
704	3305	488	33	Yucatán Este	Chichancanab	Campeche, Yucatán, Quintana Roo	24843.6							35.12	0	0.132	0	0	0.132	0	0	0	0	0	34.988	0	34.988	1	0.375854	1	1	Yes	2163.54			45.3234	4120.23		6329.1	1	Yes	5283.72	1	Yes	281	1853.61	1830.96	3327.88	7012.45
705	3306	322	33	Yucatán Este	Chunyaxche	Quintana Roo	1515.77							21.559	0	0	0	0	0	0	0	0	0	0	21.559	0	21.559	1	0	1	1	Yes					727.08		727.08	1	Yes	727.092	1	Yes	18	199.753	94.6836	209.438	503.874
706	3401	735	34	Cuencas Centrales del Norte	Río Casas Grandes 1	Sonora, Chihuahua	5239.05							87.62	0	44.851	2.05	0	46.901	4.592	0	0	0	0	45.311	18.788	26.523	1	53.5277	0	0	Yes					230.189		230.189	1	No	0	0	Yes	46	128.507	394.209	630.864	1153.58
707	3402	25	34	Cuencas Centrales del Norte	Río Casas Grandes 2	Chihuahua	13061.7							151.591	45.311	81.117	0.529	0	81.646	0	0	0	0	0	115.256	0	115.256	1	41.4653	0	0	Yes					3619.71		3619.71	1	No	0	0	Yes	41	181.98	123.869	733.954	1039.8
708	3403	34	34	Cuencas Centrales del Norte	Hacienda San Francisco-Juguete-Madero-Palomas	Sonora, Chihuahua	5337.07							68.684	0	0.008	0	0	0.008	0	0	0	0	0	68.675	0	68.675	1	0.0116475	1	1	Yes					1133.42		1133.42	1	No	0	0	Yes	36	0	323.208	526.802	850.01
709	3404	68	34	Cuencas Centrales del Norte	Laguna de Babicora	Chihuahua	1921.38							54.75	0	0.282	0	0	0.282	0	0	0	0	0	54.468	0	54.468	1	0.515068	1	1	No							0	0	Yes	260.057	1	Yes	11	250.004	0	18.0413	268.046
710	3405	738	34	Cuencas Centrales del Norte	Río Santa María 1	Chihuahua	3870.44							72.945	0	78.357	0.381	0	78.738	7.84	0	0	10.292	-0.202	-8.043	0	-8.043	0	121.774	0	0	No							0	0	No	0	0	Yes	19	66.6615	25.0004	377.853	469.515
711	3406	37	34	Cuencas Centrales del Norte	Río Santa María 2	Chihuahua	5638.36							71.886	0	16.925	0	0	16.925	0	0	0	0	0	54.961	0	54.961	1	23.5442	0	0	No							0	0	No	0	0	Yes	42	183.342	280.801	607.023	1071.17
712	3407	36	34	Cuencas Centrales del Norte	Laguna El Sabinal	Chihuahua	1885.57							25.459	0	19.974	0	0	19.974	0	0	0	0	0	5.485	0	5.485	1	78.4556	0	0	No							0	0	No	0	0	Yes	7	8.28681	0	193.992	202.279
713	3408	22	34	Cuencas Centrales del Norte	Desierto de Samalayuca	Chihuahua	8357.77							129.176	0	0.005	0	0	0.005	0	0	0	0	0	129.171	0	129.171	1	0.00387069	1	1	Yes	165.104						165.104	1	No	0	0	Yes	33	53.4483	100.002	652.386	805.836
714	3409	737	34	Cuencas Centrales del Norte	Laguna La Vieja	Chihuahua	1837.88							34.68	0	0.335	0	0	0.335	0	0	0	0	0	34.345	0	34.345	1	0.965975	1	1	No							0	0	No	0	0	Yes	9	0	25.0004	190.173	215.174
715	3410	736	34	Cuencas Centrales del Norte	Río del Carmen 1	Chihuahua	4568.98							77.896	0	61.903	2.986	0	64.889	6.481	0	0	6.157	0.72	12.611	0.003	12.608	1	92.1305	0	0	No							0	0	No	0	0	Yes	14	125.002	130.003	100.002	355.007
716	3411	32	34	Cuencas Centrales del Norte	Río del Carmen 2	Chihuahua	8749.73							104.31	12.611	0.027	0	0	0.027	0	0	0	0	0	116.894	0	116.894	1	0.0230925	1	1	No							0	0	No	0	0	Yes	13	50.0008	19.9995	265.51	335.511
717	3412	44	34	Cuencas Centrales del Norte	Rancho El Cuarenta	Chihuahua	1023.08							16.331	0	0	0	0	0	0	0	0	0	0	16.331	0	16.331	1	0	1	1	No							0	0	No	0	0	Yes	3	0	0	70.2316	70.2316
718	3413	740	34	Cuencas Centrales del Norte	Arroyo Roma	Chihuahua	1782.83							29.626	0	0	0	0	0	0	0	0	0	0	29.626	0	29.626	1	0	1	1	Yes	379.194						379.194	1	No	0	0	Yes	8	0	0	204.409	204.409
991	3414	48	34	Cuencas Centrales del Norte	Félix U. Gómez	Chihuahua	2893.27							32.406	0	0	0	0	0	0	0	0	0	0	32.406	0	32.406	1	0	1	1	No							0	0	No	0	0	No					0
720	3415	50	34	Cuencas Centrales del Norte	Arroyo El Carrizo	Chihuahua	3708.84							41.386	0	0.282	0	0	0.282	0	0	0	0	0	41.104	0	41.104	1	0.68139	1	1	No							0	0	No	0	0	Yes	8	0	0	200.003	200.003
721	3416	54	34	Cuencas Centrales del Norte	Arroyo El Burro	Chihuahua	4402.82							56.013	0	0	0	0	0	0	0	0	0	0	56.013	0	56.013	1	0	1	1	No							0	0	No	0	0	Yes	17	0	50.0008	362.966	412.966
722	3417	57	34	Cuencas Centrales del Norte	Laguna de Tarabillas	Chihuahua	1863.45							26.991	0	0.001	0	0	0.001	0	0	0	0	0	26.99	0	26.99	1	0.00370494	1	1	No							0	0	No	0	0	Yes	6	0	0	141.745	141.745
723	3418	64	34	Cuencas Centrales del Norte	Laguna El Cuervo	Chihuahua	6233.89							95.944	0	0.572	1.192	0	1.764	0	0	0	0	0	94.18	0	94.18	1	1.83857	1	1	No							0	0	No	0	0	Yes	31	110.275	225.004	446.514	781.793
724	3419	70	34	Cuencas Centrales del Norte	Laguna de Encinillas	Chihuahua	2883.3							51.996	0	0.253	0	0	0.253	0	0	0	0	0	51.744	0	51.744	1	0.486576	1	1	No							0	0	No	0	0	Yes	18	150.003	100.002	200.003	450.008
992	3420	76	34	Cuencas Centrales del Norte	Rancho Hormigas-El Diablo	Chihuahua	196.536							4.776	0	0	0	0	0	0	0	0	0	0	4.776	0	4.776	1	0	1	1	No							0	0	No	0	0	No					0
726	3421	88	34	Cuencas Centrales del Norte	Laguna de Bustillos	Chihuahua	3227.26							77.719	0	45.791	10.86	0	56.651	5.623	0	0	0	0	26.691	0	26.691	1	72.8921	0	0	No							0	0	No	0	0	Yes	18	125.009	0	315.137	440.147
727	3422	739	34	Cuencas Centrales del Norte	Laguna Los Mexicanos	Chihuahua	767.618							26.242	0	2.324	0.272	0	2.596	0.224	0	0	0	0	23.87	0	23.87	1	9.89254	1	1	No							0	0	No	0	0	Yes	1	0	0	21.826	21.826
728	3501	138	35	Mapimí	Valle Hundido	Coahuila de Zaragoza	7892.68							13.465	0	0.002	0	0	0.002	0	0	0	0	0	13.463	9.424	4.039	1	0.0148533	1	1	Yes		539.139					539.139	1	No	0	0	Yes	11	48.4897	0	213.262	261.751
729	3502	123	35	Mapimí	Laguna del Rey	Coahuila de Zaragoza, Chihuahua, Durango	16050.4							55.614	0	0.064	0	0	0.064	0	0	0	0	0	55.55	38.885	16.665	1	0.115079	1	1	Yes		3.32606			2175.1		2178.43	1	No	0	0	Yes	81	150.003	370.832	1508.95	2029.79
730	3503	104	35	Mapimí	Laguna del Guaje-Lipanés	Chihuahua, Coahuila de Zaragoza	7289.32							23.436	0	0.041	0	0	0.041	0	0	0	0	0	23.396	16.377	7.019	1	0.174945	1	1	No							0	0	No	0	0	Yes	62	0	300.006	1220.01	1520.01
731	3504	82	35	Mapimí	Polvorillos- Arroyo El Marquez	Chihuahua, Coahuila de Zaragoza	12355.6							42.6	0	0.551	0	0	0.551	0	0	0	0	0	42.048	29.434	12.614	1	1.29343	1	1	No							0	0	No	0	0	Yes	80	25.0005	250.005	1747.07	2022.08
732	3505	102	35	Mapimí	El Llano-Laguna del Milagro	Chihuahua, Coahuila de Zaragoza	10342							44.601	0	0.554	0	0	0.554	0	0	0	0	0	44.046	30.832	13.214	1	1.24212	1	1	No							0	0	No	0	0	Yes	67	75.0015	200.004	1377.67	1652.68
733	3506	126	35	Mapimí	Arroyo La India-Laguna Palomas	Chihuahua, Durango	10978.9							45.253	0	34.684	0	0	34.684	0	0	0	0	0	10.569	7.398	3.171	1	76.6446	0	0	Yes					181.778		181.778	1	No	0	0	Yes	106	85.4037	313.74	2218.08	2617.22
734	3601	147	36	Nazas-Aguanaval	Río Sextín	Durango	4884.51							501.523	0	4.979	0	0	4.979	0.053	0	0	0	0	496.596	493.391	3.205	1	0.992776	1	1	No							0	0	No	0	0	Yes	116	129.651	2008.8	785.327	2923.78
735	3602	166	36	Nazas-Aguanaval	Río Ramos	Durango	6740.97							566.006	0	12.293	0	0	12.293	1.607	0	0	0	0	555.32	551.736	3.584	1	2.17189	1	1	No							0	0	No	0	0	Yes	171	643.355	2090.61	1490.46	4224.43
736	3603	159	36	Nazas-Aguanaval	Presa Lázaro Cárdenas	Durango	6538.74							197.025	1051.92	5.364	0	0	5.364	0.498	0	94.168	125.345	26.381	998.182	990.117	8.065	1	20.1177	0	0	No							0	0	No	0	0	Yes	117	295.055	1321.65	1345.45	2962.16
737	3604	167	36	Nazas-Aguanaval	Agustín Melgar	Durango	11467.7							120.078	998.182	87.456	0	0	87.456	1.984	0	0	0	0	1032.79	1023.74	9.051	1	7.82072	1	1	No							0	0	No	0	0	Yes	76	220.275	244.706	1332.72	1797.7
738	3605	174	36	Nazas-Aguanaval	Presa Francisco Zarco	Durango	3450.64							66.024	1032.79	8.42	0	0	8.42	0.951	0	80.947	40.408	0.961	969.027	959.389	9.638	1	11.8979	0	0	No							0	0	Yes	0.0368453	1	Yes	22	0	70.1968	471.938	542.135
739	3606	171	36	Nazas-Aguanaval	Los Ángeles	Durango	1344.2							1.05	969.027	71.225	0	0	71.225	0.848	0	0	0	0	899.7	890.043	9.657	1	7.3422	1	1	No							0	0	Yes	161.132	1	Yes	5	25.0006	4.80515	111.888	141.694
740	3607	143	36	Nazas-Aguanaval	Canal Santa Rosa	Durango, Coahuila de Zaragoza	9085.51							3.042	899.7	844.781	73.344	0	918.125	27.503	0	0	0	0	12.12	2.135	9.985	1	101.704	0	0	Yes					940.805		940.805	1	No	0	0	Yes	25	25.0006	21.3998	606.152	652.552
741	3608	149	36	Nazas-Aguanaval	Arroyo Cadena	Durango	3239.57							4.695	0	0.005	0	0	0.005	0	0	0	0	0	4.69	0	4.69	1	0.106496	1	1	Yes					100.289		100.289	1	No	0	0	Yes	20	25.0006	22.9086	409.262	457.172
742	3609	157	36	Nazas-Aguanaval	Laguna de Mayrán	Coahuila de Zaragoza	10652.2							0.571	12.12	2.287	0	0	2.287	0.291	0	0	0	0	10.695	0	10.695	1	18.0206	0	0	No							0	0	No	0	0	Yes	13	50.0012	0	260.839	310.841
743	3610	297	36	Nazas-Aguanaval	Presa Santa Rosa	Zacatecas	225.444							10.473	0	0.115	0	0	0.115	0.086	0	0	4.086	-0.086	6.444	4.649	1.795	1	39.2915	0	0	Yes		1.6333					1.6333	1	No	0	0	Yes	4	0	35.1843	69.3393	104.524
744	3611	267	36	Nazas-Aguanaval	Presa Leobardo Reynoso	Zacatecas	1409.98							40.968	0	0.078	0	0	0.078	0	0	0	8.856	1.286	30.748	22.184	8.564	1	24.9463	0	0	No							0	0	No	0	0	Yes	37	174.667	531.619	252.676	958.962
745	3612	248	36	Nazas-Aguanaval	Presa Cazadero	Zacatecas	3314.69							75.765	37.191	41.33	0.002	0	41.332	3.247	0	0	5.945	-0.099	69.026	36.662	32.364	1	41.7667	0	0	No							0	0	No	0	0	Yes	69	71.0074	599.785	1056.72	1727.51
746	3613	226	36	Nazas-Aguanaval	San Francisco	Zacatecas	5203.67							81.836	69.026	34.003	0	0	34.003	2.72	0	0	0	0	119.58	47.57	72.009	1	22.5391	0	0	No							0	0	No	0	0	Yes	38	25.0007	297.876	613.127	936.003
747	3614	187	36	Nazas-Aguanaval	Presa La Flor	Zacatecas, Durango, Coahuila de Zaragoza	9525.06							53.136	119.58	29.823	0	0	29.823	3.092	0	0	0	0	145.985	40.116	105.869	1	17.2671	0	0	No							0	0	No	0	0	Yes	61	0	466.237	1081.42	1547.66
748	3615	175	36	Nazas-Aguanaval	Nazareno	Durango, Coahuila de Zaragoza	3360.22							1.718	145.985	40.231	0	0	40.231	0	0	0	0	0	107.472	0.357	107.115	1	27.2378	0	0	No							0	0	Yes	15.5633	1	Yes	10	0	0	243.627	243.627
749	3616	176	36	Nazas-Aguanaval	Laguna de Viesca	Zacatecas, Durango, Coahuila de Zaragoza	9628.99							38.274	107.472	0.472	0.012	0	0.484	0	0	0	0	0	145.262	0	145.262	1	0.332085	1	1	No							0	0	No	0	0	Yes	5	0	0	125.199	125.199
750	3701	179	37	El Salado	Sierra Madre Oriental	Coahuila de Zaragoza, San Luis Potosí, Nuevo León	9867.02							24.473	0	0.016	0	0	0.016	0	0	0	0	0	24.457	18.343	6.114	1	0.0653782	1	1	Yes		1.27557					1.27557	1	No	0	0	Yes	59	367.298	148.171	990.364	1505.83
751	3702	207	37	El Salado	Matehuala	San Luis Potosí, Zacatecas, Nuevo León	10389.6							25.868	0	5.615	0	0	5.615	0	0	0	0	0	20.253	15.189	5.063	1	21.7064	0	0	Yes	92.7872						92.7872	1	No	0	0	Yes	183	701.717	2636	1243.01	4580.73
752	3703	191	37	El Salado	Sierra de Rodríguez	San Luis Potosí, Zacatecas, Nuevo León	8164.47							19.498	0	0.286	0	0	0.286	0.069	0	0	0	0	19.281	14.46	4.82	1	1.46682	1	1	No							0	0	No	0	0	Yes	36	103.379	241.137	585.377	929.893
753	3704	200	37	El Salado	Camacho-Gruñidora	Zacatecas, Durango, Coahuila de Zaragoza	9162.42							18.671	0	1.665	0	0	1.665	0	0	0	0	0	17.006	12.754	4.251	1	8.91757	1	1	No							0	0	No	0	0	Yes	20	0	25.0007	472.709	497.71
754	3705	231	37	El Salado	Fresnillo - Yescas	Zacatecas, San Luis Potosí	14380.9							34.658	0	24.234	0.914	0	25.148	7.733	0	0	0	0	17.243	12.932	4.311	1	72.5604	0	0	No							0	0	Yes	16.1848	1	Yes	160	107.009	991.934	2803.79	3902.73
755	3706	259	37	El Salado	Presa San Pablo y otras	San Luis Potosí, Aguascalientes, Zacatecas, Jalisco	12699.3							30.738	0	14.502	0.588	0	15.09	0	0	0	0	0	15.648	11.736	3.912	1	49.0923	0	0	Yes	130.361						130.361	1	No	0	0	Yes	188	609.828	1089.6	2980.34	4679.77
756	3707	275	37	El Salado	Presa San José - Los Pilares y otras	San Luis Potosí, Nuevo León, Zacatecas	11267.7							32.47	0	38.161	0.001	0	38.163	0	31.536	0	0	0	25.843	19.382	6.461	1	117.53	0	0	Yes	500.673						500.673	1	No	0	0	Yes	176	428.943	301.331	3644.99	4375.26
757	3708	244	37	El Salado	Sierra Madre	San Luis Potosí, Tamaulipas, Nuevo León	11519.9							32.403	0	8.498	0	0	8.498	0	0	0	0	0	23.905	17.929	5.976	1	26.226	0	0	No							0	0	No	0	0	Yes	229	378.63	2391.31	2812.24	5582.18
[truncated: 23 more columns]

## Sheet: EnvObjectives_Nomenclature
	Column heading	Description
	Consecutive	Consecutive number
	ID_2022	Basin code assigned based on Hydrological Region plus number of management unit in water availability studies
	ID_2013	Basin code in 2013 database
	HR_code	Code of Hydrological Region
	HR_name	Name of Hydrological Region
	Basin_name	Basin name
	Mexican state	Federative entity
	SUR_KM2	Surface in square kilometers
	Reserve_zone	Name of the reserve zone
	EnvReserve_date	Date of environmental water reserve establishment
	VolEnvReserve	Water reserve established for the environment published on the Official Journal of the Federation in million cubic meters per year
	PUReserve_date	Establishment date of water reserve for public-urban use
	VolPUReserve	Water reserve established for public-urban use published on the Official Journal of the Federation in million cubic meters per year
	Revoke_date	Date of revoktion of the water reserve
	Wb	Ruoff within the basin in million cubic meters per year
	UpS	Upstream runoff in million cubic meters per year
	UCa	Consumptive use in million cubic meters per year
	UCb	Consumptive use, concessioned or in a concession's emission process in million cubic meters per year
	UCc	Water reserve for the environment in million cubic meters per year
	TotUC	Sum of consumptive uses, concessioned or in a concession's emission process, and environmental water reserve (UCa+UCb+UCc) in million cubic meters per year
	R	Returns in million cubic meters per year
	IM	Imports in million cubic meters per year
	EX	Exports in million cubic meters per year
	EV	Evaporation in million cubic meters per year
	FV_AV	Variation in reservoirs in million cubic meters per year
	AB	Surface water extraction in million cubic meters per year
	RXY	Downstream commitment in million cubic meters per year
	D	Mean annual availability in million cubic meters per year
	Pressure_use	Water exploitation index, percentage relationship between the water availability and the volumes extracted for productive uses, losses due to evaporation, and reservoir level variations
	Pressure_class	Water exploitation class (low ≤ 10%, medium ≥ 11%, high ≥ 40%, and very high ≥ 80% = high)
	PRES_NPA_Tot	Presence of natural protected area, federal, state, municipal, or private
	FFPA	Surface of flora and fauna protection area category in square kilometers
	NRPA	Surface of natural resources protection area category in square kilometers
	NM	Surface of national monument category in square kilometers
	NP	Surface of national park category in square kilometers
	BR	Surface of biosphere reserve category in square kilometers
	SANT	Surface of sanctuary category in square kilometers
	NPA_State	Surface of natural protected area at state level in square kilometers
	NPA_Private	Surface of natural protected area promoted by private sector in square kilometers
	SUR_NPATot	Total surface of natural protected area of all kinds
	F_NPATot	Natural protected area factor (0 = there isn't any, 1 = one or more)
	PRES_RAMSAR	Presence of wetlands of international importance (Ramsar sites)
	SUR_RAMSAR	Total surface of Ramsar sites in square kilometers
	F_RAMSAR	Ramsar site factor (0 = there isn't any, 1 = one or more)
	PRES_GEPI	Presence of gaps and omissions of epicontinental aquatic conservation
	TOT_GEPI	Total gaps and omissions of epicontinental aquatic conservation
	EXTREME	Surface of extreme gaps and omissions category in square kilometers
	HIGH	Surface of high gaps and omissions category in square kilometers
	MEDIUM	Surface of medium gaps and omissions category in square kilometers
	SUR_GEPI	Total surface of gaps and omissions of epicontinental aquatic conservation
	F_GEPI	Gaps and omissions of epicontinental aquatic conservation factor (0 ≤ 33 gaps, 1 ≥ 34 gaps)
	F_EI	Ecological importance factor
	Ecimp_class	Ecological importance class (0 = Low, 1 = Medium, 2 = High, 3 = Very high)
	Envobjective	Environmental objective class
	DesConState	Desire conservation state
	EWR_ValRef	Environmental water reserve based on reference values
	Availab-Reserve	Water availability minus environmental water reserve based on reference values

## Sheet: Environmental objectives
Basic labeling								Reserves						Water availability																Ecological importance
Consecutive	ID_2022	ID_2013	HR_code	HR_name	Basin_name	Mexican state	SUR_KM2	Reserve_zone	EnvReserve_date	VolEnvReserve	PUReserve_date	VolPUReserve	Revoke_date	Wb	UpS	UCa	UCb	UCc	TotUC	R	IM	EX	EV	FV_AV	AB	RXY	D	Pressure_use	Pressure_class	PRES_NPA_Tot	FFPA	NRPA	NM	NP	BR	SANT	NPA_State	NPA_Private	SUR_NPATot	F_NPATot	PRES_RAMSAR	SUR_RAMSAR	F_RAMSAR	PRES_GEPI	TOT_GEPI	EXTREME	HIGH	MEDIUM	SUR_GEPI
1	0101	1	1	Baja California Noroeste	Tijuana	Baja California	3262.72							83.014	17.359	209.194	0	0	209.194	0	126.144	0	5.826	-4.297	15.794	8.301	7.492	2812.64	Very high	No									0	0	No	0	0	Yes	22	122.834	135.676	301.672	560.182
2	0102	4	1	Baja California Noroeste	Descanso-Los Médanos	Baja California	661.945							12.391	0	0.566	0	0	0.566	0	0	0	0	0	11.825	1.239	10.586	5.34668	Low	No									0	0	No	0	0	Yes	3	36.5114	0	25.0003	61.5117
3	0103	7	1	Baja California Noroeste	Guadalupe	Baja California	2434.38							48.848	0	36.278	0	0	36.278	0	0	0	0	0	12.57	4.885	7.685	472.062	Very high	Yes				39.0916					39.0916	1	Yes	5.17219	1	Yes	21	237.643	97.3913	222.173	557.207
4	0104	8	1	Baja California Noroeste	Ensenada-El Gallo	Baja California	752.479							15.078	0	2.275	0	0	2.275	0	0	0	0.488	0.028	12.287	1.508	10.779	25.8929	Medium	No									0	0	No	0	0	Yes	2	58.6594	0.347758	19.7655	78.7726
5	0105	11	1	Baja California Noroeste	San Carlos	Baja California	895.956							16.194	0	0.808	0	0	0.808	0	0	0	0	0	15.386	1.619	13.766	5.86953	Low	No									0	0	Yes	2.89699	1	Yes	15	119.158	133.956	127.804	380.917
6	0106	14	1	Baja California Noroeste	Maneadero-Las Ánimas	Baja California	908.336							20.272	0	0.86	0	0	0.86	0	0	0	0	0	19.412	2.027	17.385	4.94679	Low	No									0	0	Yes	15.3675	1	Yes	6	77.0818	0.137222	81.2408	158.46
7	0107	15	1	Baja California Noroeste	Santo Tomás	Baja California	790.392							15.991	0	0.36	0	0	0.36	0	0	0	0	0	15.631	1.599	14.032	2.56556	Low	No									0	0	No	0	0	Yes	3	19.5479	0	47.3932	66.9412
8	0108	13	1	Baja California Noroeste	San Vicente	Baja California	2180.92							33.46	0	1.552	0.25	0	1.802	0	0	0	0	0	31.658	3.346	28.312	6.36479	Low	No									0	0	No	0	0	Yes	23	165.322	232.922	175.037	573.28
9	0109	18	1	Baja California Noroeste	Los Cochis-El Salado	Baja California	1926.93							25.892	0	1.249	0	0	1.249	0	0	0	0	0	24.643	2.589	22.054	5.66337	Low	Yes				1.67611					1.67611	1	No	0	0	Yes	9	15.9392	101.12	114.7	231.759
10	0110	21	1	Baja California Noroeste	San Rafael	Baja California	1356.13							13.704	0	0.439	0	0	0.439	0	0	0	0	0	13.265	1.37	11.895	3.69063	Low	Yes				86.3289					86.3289	1	No	0	0	Yes	13	138.838	73.3945	94.9782	307.211
11	0111	26	1	Baja California Noroeste	San Telmo	Baja California	1377.67							10.744	0	4.313	0	0	4.313	0	0	0	0	0	6.431	1.074	5.356	80.5265	Very high	Yes				35.9127					35.9127	1	No	0	0	Yes	12	53.6103	2.79697	226.692	283.099
12	0112	29	1	Baja California Noroeste	Santo Domingo	Baja California	1267.83							9.48	0	3.853	0.043	0	3.896	0	0	0	0	0	5.584	0.948	4.636	84.038	Very high	Yes				553.246				37.902	591.148	1	No	0	0	Yes	18	132.588	71.6422	237.568	441.797
13	0113	35	1	Baja California Noroeste	San Quintín	Baja California	928.151							7.592	0	0.377	0	0	0.377	0	0	0	0	0	7.215	0.759	6.456	5.83953	Low	Yes								18.3607	18.3607	1	Yes	72.6623	1	Yes	8	42.1258	6.23917	154.398	202.762
14	0114	38	1	Baja California Noroeste	San Simón	Baja California	1697.76							11.504	0	0.176	0	0	0.176	0	0	0	0	0	11.328	1.15	10.177	1.72939	Low	Yes				32.9826				5.75014	38.7327	1	Yes	25.2119	1	Yes	11	53.2425	50.0008	181.438	284.681
15	0115	42	1	Baja California Noroeste	El Socorro	Baja California	783.897							6.06	0	0.002	0	0	0.002	0	0	0	0	0	6.058	0.606	5.452	0.0366838	Low	Yes								37.0091	37.0091	1	No	0	0	Yes	7	49.8476	0	105.799	155.647
16	0116	43	1	Baja California Noroeste	El Rosario	Baja California	2735.4							28.664	0	1.615	0	0	1.615	0	0	0	0	0	27.049	2.866	24.183	6.67825	Low	Yes	0.0190087								0.0190087	1	No	0	0	Yes	31	229.55	174.308	366.406	770.264
17	0201	51	2	Baja California Centro Oeste	Santa Catarina	Baja California	2784.09							30.676	0	0.957	0	0	0.957	0	0	0	0	0	29.719	3.068	26.651	3.59086	Low	Yes	2082.02								2082.02	1	No	0	0	Yes	11	75.0012	100.002	92.756	267.759
18	0202	56	2	Baja California Centro Oeste	La Bocana	Baja California	2591.47							18.661	0	0.018	0	0	0.018	0	0	0	0	0	18.643	1.866	16.777	0.10729	Low	Yes	2590.98							15.3958	2606.38	1	No	0	0	Yes	9	100.002	50.0008	75.0012	225.004
19	0203	59	2	Baja California Centro Oeste	Jaraguay	Baja California	1074.28							5.233	0	0.043	0	0	0.043	0	0	0	0	0	5.19	0.523	4.666	0.92156	Low	Yes	1074.16							41.4223	1115.58	1	No	0	0	Yes	1	0	0	7.87291	7.87291
20	0204	60	2	Baja California Centro Oeste	San José	Baja California	841.202							4.949	0	0.009	0	0	0.009	0	0	0	0	0	4.94	0.495	4.445	0.202475	Low	Yes	841.207							45.976	887.183	1	No	0	0	Yes	1	0	0	35.3395	35.3395
21	0205	62	2	Baja California Centro Oeste	Chapala	Baja California	920.266							6.291	0	0.002	0	0	0.002	0	0	0	0	0	6.289	0.629	5.66	0.0353357	Low	Yes	920.084							9.91734	930.001	1	No	0	0	Yes	7	25.0004	25.0004	102.996	152.996
22	0206	67	2	Baja California Centro Oeste	Boca del Carrizo	Baja California	1457.07							9.395	0	0.06	0	0	0.06	0	0	0	0	0	9.335	0.94	8.395	0.714711	Low	Yes	1457.95							59.9718	1517.92	1	No	0	0	Yes	10	102.268	40.7386	76.0857	219.092
23	0207	69	2	Baja California Centro Oeste	San Andrés	Baja California	2011.09							12.559	0	0	0	0	0	0	0	0	0	0	12.559	1.256	11.303	0	Low	Yes	2011.24								2011.24	1	No	0	0	Yes	7	97.663	25.3095	51.0135	173.986
24	0208	80	2	Baja California Centro Oeste	Santo Dominguito	Baja California	391.128							3.266	0	0	0	0	0	0	0	0	0	0	3.266	0.327	2.939	0	Low	Yes	391.541								391.541	1	No	0	0	Yes	0	6.77222	3.31258	0	10.0848
25	0209	79	2	Baja California Centro Oeste	Rosarito	Baja California	952.76							5.624	0	0.014	0	0	0.014	0	0	0	0	0	5.61	0.562	5.048	0.277338	Low	Yes	952.824								952.824	1	No	0	0	Yes	2	40.9801	0	0	40.9801
26	0210	87	2	Baja California Centro Oeste	San Miguel	Baja California	606.265							3.683	0	0.09	0	0	0.09	0	0	0	0	0	3.593	0.368	3.225	2.7907	Low	Yes	606.709								606.709	1	No	0	0	Yes	1	28.4255	0	0	28.4255
27	0211	90	2	Baja California Centro Oeste	Paraíso	Baja California	1519.61							6.29	0	0.024	0	0	0.024	0	0	0	0	0	6.266	0.629	5.637	0.425758	Low	Yes	1519.77				0.805263				1520.58	1	No	0	0	Yes	12	197.822	43.5856	50.001	291.409
28	0212	96	2	Baja California Centro Oeste	San Luis	Baja California, Baja California Sur	3250.41							11.596	0	0	0	0	0	0	0	0	0	0	11.596	1.16	10.436	0	Low	Yes	2103.5				1195.13				3298.63	1	Yes	251.207	1	Yes	12	221.047	25.7309	87.5945	334.372
29	0213	725	2	Baja California Centro Oeste	El Arco	Baja California, Baja California Sur	1434.46							5.482	0	0	0	0	0	0	0	0	0	0	5.482	0.548	4.934	0	Low	Yes	462.634				983.249				1445.88	1	Yes	2.8369	1	Yes	15	77.3689	0	285.842	363.211
30	0214	94	2	Baja California Centro Oeste	Vizcaíno	Baja California, Baja California Sur	9116.01							31.762	0	0.083	0	0	0.083	0	0	0	0	0	31.679	3.176	28.503	0.291197	Low	Yes	879.352				8290.18				9169.53	1	Yes	1432.65	1	Yes	52	448.564	472.494	367.66	1288.72
31	0215	106	2	Baja California Centro Oeste	Punta Eugenia	Baja California Sur	2911.14							4.891	0	0.02	0	0	0.02	0	0	0	0	0	4.871	0.489	4.382	0.456413	Low	Yes					2916.27				2916.27	1	No	0	0	Yes	8	8.51865	98.3005	95.8222	202.641
32	0216	114	2	Baja California Centro Oeste	San Ignacio	Baja California Sur	12516.6							83.802	0	3.079	0.003	0	3.082	0	0	0	0	0	80.72	8.38	72.34	4.26044	Low	Yes					5773.54			5.31732	5778.86	1	Yes	4416.16	1	Yes	225	2353.16	2193.97	1024.63	5571.76
33	0301	134	3	Baja California Suroeste	La Purísima	Baja California Sur	3896.86							41.905	0	4.636	0.004	0	4.64	0	0	0	0	0	37.265	4.191	33.075	14.0287	Medium	No									0	0	Yes	2050.39	1	Yes	62	216.116	1051.95	290.927	1558.99
34	0302	148	3	Baja California Suroeste	Mezquital Seco	Baja California Sur	2013.06							24.637	0	0.015	0.007	0	0.022	0	0	0	0	0	24.615	2.464	22.151	0.0993183	Low	Yes					0.0502565			6.27384	6.3241	1	Yes	1535.75	1	Yes	40	193.693	774.142	54.8882	1022.72
35	0303	155	3	Baja California Suroeste	Santo Domingo	Baja California Sur	4715.66							67.633	0	0.752	0.006	0	0.758	0	0	0	0	0	66.875	6.763	60.112	1.26098	Low	Yes								6.45413	6.45413	1	Yes	914.042	1	Yes	22	103.951	31.6901	404.112	539.753
36	0304	170	3	Baja California Suroeste	Bramonas	Baja California Sur	7245.11							91.183	0	0.424	0.006	0	0.43	0	0	0	0	0	90.753	9.118	81.635	0.526735	Low	Yes					0.0108817			1.34985	1.36073	1	Yes	6.64945	1	Yes	20	214.714	131.178	138.716	484.608
37	0305	184	3	Baja California Suroeste	Santa Rita	Baja California Sur	2161.31							33.022	0	0.889	0.01	0	0.899	0	0	0	0	0	32.123	3.302	28.821	3.11925	Low	Yes					0.151284				0.151284	1	Yes	506.978	1	Yes	28	134.146	121.377	357.18	612.702
38	0306	189	3	Baja California Suroeste	Las Pocitas-San Hilario	Baja California Sur	2361.18							38.036	0	0.512	0.004	0	0.516	0	0	0	0	0	37.52	3.804	33.717	1.53039	Low	Yes								5.37198	5.37198	1	Yes	1204.53	1	Yes	31	200.005	285.448	353.061	838.514
39	0307	209	3	Baja California Suroeste	Conejos-Los Viejos	Baja California Sur	1784.67							19.733	0	0.033	0	0	0.033	0	0	0	0	0	19.7	1.973	17.727	0.186157	Low	No									0	0	No	0	0	Yes	11	0	0	244.885	244.885
40	0308	228	3	Baja California Suroeste	Melitón Albañez	Baja California Sur	1612.23							20.95	0	0.024	0	0	0.024	0	0	0	0	0	20.926	2.095	18.831	0.127449	Low	Yes					1.25974				1.25974	1	No	0	0	Yes	19	167.006	147.828	145.871	460.705
41	0309	246	3	Baja California Suroeste	La Matanza	Baja California Sur	426.796							6.981	0	0.73	0.013	0	0.743	0	0	0	0	0	6.238	0.698	5.54	13.4116	Medium	Yes					285.967				285.967	1	No	0	0	Yes	16	122.596	241.471	32.6145	396.682
42	0310	257	3	Baja California Suroeste	Cañada Honda	Baja California Sur	40.3306							0.724	0	0.003	0	0	0.003	0	0	0	0	0	0.721	0.072	0.649	0.46225	Low	No									0	0	No	0	0	Yes	1	10.6472	0	6.02417	16.6714
43	0311	256	3	Baja California Suroeste	Todos Santos	Baja California Sur	161.427							3.227	0	5.605	0	0	5.605	0	0	0	0	0	-2.378	0.323	-2.701	0	Very high	Yes					19.1593				19.1593	1	No	0	0	Yes	5	1.17143	14.8267	91.7323	107.73
44	0312	255	3	Baja California Suroeste	Pescaderos	Baja California Sur	374.042							8.318	0	0.559	1.14	0	1.698	0	0	0	0	0	6.62	0.832	5.788	29.3366	Medium	Yes					179.885				179.885	1	Yes	1.43137	1	Yes	8	45.6359	103.496	63.9301	213.062
45	0313	265	3	Baja California Suroeste	Plutarco E. Calles	Baja California Sur	471.005							11.647	0	1.971	0.018	0	1.988	0	0	0	0	0	9.659	1.165	8.494	23.4048	Medium	No									0	0	Yes	2.09803	1	Yes	13	37.3709	87.4601	214.197	339.028
46	0314	274	3	Baja California Suroeste	Migriño	Baja California Sur	289.659							7.948	0	0.003	0.003	0	0.006	0	0	0	0	0	7.942	0.795	7.147	0.0839513	Low	No									0	0	Yes	0.755778	1	Yes	2	0	2.01225	55.5387	57.5509
47	0315	243	3	Baja California Suroeste	El Carrizal	Baja California Sur	247.963							4.385	0	0.004	0	0	0.004	0	0	0	0	0	4.381	0.439	3.943	0.101446	Low	Yes					0.210646				0.210646	1	No	0	0	Yes	5	105.017	38.1599	16.7268	159.903
48	0401	5	4	Baja California Noreste	Cerrada Laguna Salada	Baja California	6228.47							65.25	0	0.267	0	0	0.267	0	0	0	0	0	64.983	6.525	58.458	0.456738	Low	Yes				11.601	10.21				21.811	1	Yes	794.273	1	Yes	66	710.109	446.181	468.605	1624.89
49	0402	16	4	Baja California Noreste	El Borrego	Baja California	2899.53							19.344	0	0	0	0	0	0	0	0	0	0	19.344	1.934	17.41	0	Low	Yes					1297.47				1297.47	1	Yes	864.45	1	Yes	31	646.803	100.216	31.5424	778.561
50	0403	20	4	Baja California Noreste	Cerrada Santa Clara	Baja California	1454.61							16.961	0	0.012	0	0	0.012	0	0	0	0	0	16.949	1.696	15.253	0.078673	Low	Yes				18.984					18.984	1	No	0	0	Yes	0	7.64164	0	4.91515	12.5568
51	0404	27	4	Baja California Noreste	Bahía San Felipe	Baja California	782.101							3.808	0	0	0	0	0	0	0	0	0	0	3.808	0.381	3.427	0	Low	Yes					29.8794				29.8794	1	No	0	0	Yes	4	0	35.7683	52.1758	87.9441
52	0405	31	4	Baja California Noreste	Huatamote	Baja California	1855.8							11.594	0	0.03	0	0	0.03	0	0	0	0	0	11.564	1.159	10.404	0.288351	Low	Yes				4.42394				1.64528	6.06922	1	No	0	0	Yes	5	0	0	150.175	150.175
53	0406	39	4	Baja California Noreste	San Fermín	Baja California	1158.95							4.997	0	0	0	0	0	0	0	0	0	0	4.997	0.5	4.497	0	Low	No									0	0	No	0	0	Yes	4	14.7558	0	78.3536	93.1094
54	0407	47	4	Baja California Noreste	Agua Dulce	Baja California	1420.1							8.827	0	0	0	0	0	0	0	0	0	0	8.827	0.883	7.944	0	Low	Yes	209.406								209.406	1	No	0	0	Yes	6	60.0869	75.6959	32.0745	167.857
55	0408	2	4	Baja California Noreste	Agua Grande	Baja California	732.046							9.101	0	0	0	0	0	0	0	0	0	0	9.101	0.91	8.191	0	Low	No									0	0	No	0	0	Yes	17	307.016	54.3239	56.886	418.226
56	0501	53	5	Baja California Centro Este	La Palma	Baja California	1131.17							6.335	0	0.001	0	0	0.001	0	0	0	0	0	6.334	0.634	5.701	0.0175408	Low	Yes	1128.47								1128.47	1	No	0	0	Yes	6	125.002	0	46.9329	171.935
57	0502	58	5	Baja California Centro Este	Calamajue	Baja California	1037.96							6.208	0	0	0	0	0	0	0	0	0	0	6.208	0.621	5.587	0	Low	Yes	1035.79								1035.79	1	No	0	0	Yes	2	0	0	54.7666	54.7666
58	0503	61	5	Baja California Centro Este	Asamblea	Baja California	1414.68							7.791	0	0.003	0	0	0.003	0	0	0	0	0	7.788	0.779	7.009	0.0428021	Low	Yes	1409.45				4.80066				1414.25	1	Yes	3.30274	1	Yes	0	0	2.59332	0	2.59332
59	0504	72	5	Baja California Centro Este	Tepetate	Baja California	1181.09							5.822	0	0.043	0	0	0.043	0	0	0	0	0	5.779	0.582	5.197	0.8274	Low	Yes	1175.94				5.88971				1181.83	1	Yes	5.72094	1	Yes	1	0	0.635992	15.4288	16.0648
60	0505	77	5	Baja California Centro Este	San Pedro	Baja California	1212.69							5.104	0	0.244	0	0	0.244	0	0	0	0	0	4.86	0.51	4.349	5.61049	Low	Yes	1205.03				8.75859				1213.79	1	Yes	7.25408	1	Yes	3	25.0005	25.0005	19.4014	69.4023
61	0506	83	5	Baja California Centro Este	El Alambrado	Baja California	849.531							5.12	0	0	0	0	0	0	0	0	0	0	5.12	0.512	4.608	0	Low	Yes	785.092				8.15157				793.244	1	Yes	4.50897	1	Yes	1	0	0	30.5337	30.5337
62	0507	95	5	Baja California Centro Este	El Infiernito	Baja California	1017.15							7.221	0	0	0	0	0	0	0	0	0	0	7.221	0.722	6.499	0	Low	Yes	271.444				0.21582				271.66	1	No	0	0	Yes	6	166.641	0	0	166.641
63	0508	129	5	Baja California Centro Este	Mulegé	Baja California Sur	758.895							8.678	0	0.121	0	0	0.121	0	0	0	0	0	8.557	0.868	7.689	1.57368	Low	No									0	0	Yes	5.46982	1	Yes	2	38.5366	11.6956	6.06848	56.3006
64	0509	125	5	Baja California Centro Este	San Marcos-Palo Verde	Baja California Sur	999.403							14.87	0	0.77	0.005	0	0.775	0	0	0	0	0	14.095	1.487	12.608	6.14689	Low	No									0	0	Yes	15.9227	1	Yes	9	192.784	1.08172	26.4805	220.346
65	0510	124	5	Baja California Centro Este	San Bruno	Baja California Sur	140.6							1.162	0	0	0	0	0	0	0	0	0	0	1.162	0.116	1.046	0	Low	No									0	0	No	0	0	Yes	1	13.658	0	5.82271	19.4808
66	0511	121	5	Baja California Centro Este	San Lucas	Baja California Sur	164.236							1.14	0	0	0.003	0	0.003	0	0	0	0	0	1.137	0.114	1.023	0.293255	Low	Yes					0.639045				0.639045	1	No	0	0	Yes	1	47.4527	0	0	47.4527
67	0512	119	5	Baja California Centro Este	Santa Agueda	Baja California Sur	429.478							4.663	0	0.635	0	0	0.635	0	0	0	0	0	4.028	0.466	3.562	17.8271	Medium	Yes					64.199				64.199	1	No	0	0	Yes	3	72.7152	0	0	72.7152
68	0513	118	5	Baja California Centro Este	Santa Rosalía	Baja California Sur	149.19							1.009	0	0	0	0	0	0	0	0	0	0	1.009	0.101	0.908	0	Low	Yes					82.3718				82.3718	1	No	0	0	Yes	3	41.3617	0	14.2105	55.5722
69	0514	111	5	Baja California Centro Este	Las Vírgenes	Baja California Sur	1462.79							16.552	0	0.03	0	0	0.03	0	0	0	0	0	16.522	1.655	14.866	0.201803	Low	Yes					1408.56				1408.56	1	No	0	0	Yes	6	30.6284	86.2172	53.1394	169.985
70	0515	105	5	Baja California Centro Este	Paralelo 28	Baja California, Baja California Sur	871.984							11.701	0	0.009	0	0	0.009	0	0	0	0	0	11.692	1.17	10.522	0.0855351	Low	Yes					847.573				847.573	1	No	0	0	Yes	2	10.7282	13.785	25.0005	49.5137
71	0601	280	6	Baja California Sureste	San Lucas	Baja California Sur	271.046							5.262	0	0.031	0.002	0	0.033	0	0	0	0	0	5.229	0.526	4.702	0.701829	Low	Yes	2.01615								2.01615	1	Yes	1.95457	1	Yes	4	20.2253	1.04414	100.617	121.887
72	0602	261	6	Baja California Sureste	San José del Cabo	Baja California Sur	1582.56							42.428	0	3.982	0.04	0	4.022	0	0	0	0	0	38.406	4.243	34.163	11.773	Medium	Yes					127.342				127.342	1	Yes	1203.33	1	Yes	45	324.976	558.996	203.847	1087.82
73	0603	253	6	Baja California Sureste	Cabo Pulmo	Baja California Sur	531.309							9.492	0	0.015	0	0	0.015	0	0	0	0	0	9.477	0.949	8.527	0.175912	Low	Yes				1.78561					1.78561	1	Yes	0.872072	1	Yes	7	25.0007	20.7076	115.843	161.552
74	0604	249	6	Baja California Sureste	Santiago	Baja California Sur	1102.14							23.367	0	1.91	0	0	1.91	0	0	0	0	0	21.457	2.337	19.121	9.98902	Low	Yes					372.661				372.661	1	Yes	12.1428	1	Yes	17	72.0227	86.7663	240.045	398.835
75	0605	232	6	Baja California Sureste	San Bartolo	Baja California Sur	671.08							11.52	0	0.744	0	0	0.744	0	0	0	0	0	10.776	1.152	9.624	7.73067	Low	Yes					109.713				109.713	1	No	0	0	Yes	13	173.94	119.459	42.7556	336.155
76	0606	222	6	Baja California Sureste	Los Planes	Baja California Sur	1068.46							17.118	0	0.307	0.021	0	0.328	0	0	0	0	0	16.79	1.712	15.079	2.17521	Low	Yes					16.6585				16.6585	1	No	0	0	Yes	16	14.9291	137.158	244.898	396.985
77	0607	223	6	Baja California Sureste	La Paz	Baja California Sur	1409.19							24.534	0	6.782	0.005	0	6.787	0	0	0	0	0	17.747	2.453	15.294	44.3769	High	No									0	0	Yes	18.674	1	Yes	13	32.4613	12.9556	289.759	335.176
78	0608	215	6	Baja California Sureste	El Coyote	Baja California Sur	273.21							3.875	0	0.624	0.043	0	0.667	0	0	0	0	0	3.208	0.388	2.82	23.6525	Medium	Yes	12.8341								12.8341	1	Yes	8.83383	1	Yes	3	0	4.66589	56.4811	61.147
79	0609	182	6	Baja California Sureste	Alfredo B. Bonfil	Baja California Sur	1210.07							16.995	0	0.07	0	0	0.07	0	0	0	0	0	16.925	1.7	15.226	0.45974	Low	Yes								58.3622	58.3622	1	Yes	38.5138	1	Yes	3	30.8128	0	55.5877	86.4005
80	0610	163	6	Baja California Sureste	Tepentú	Baja California Sur	530.143							8.1	0	0.033	0	0	0.033	0	0	0	0	0	8.067	0.81	7.257	0.454733	Low	Yes				0.00631693				7.21324	7.21955	1	Yes	6.43795	1	Yes	1	22.2111	0	9.43369	31.6448
81	0611	151	6	Baja California Sureste	Loreto	Baja California Sur	583.655							9.501	0	0.145	0	0	0.145	0	0	0	0	0	9.356	0.95	8.406	1.72496	Low	Yes				1.08569					1.08569	1	Yes	378.453	1	Yes	13	122.938	47.3735	149.28	319.591
82	0612	142	6	Baja California Sureste	San Juan B. Londó	Baja California Sur	684.243							8.837	0	0.026	0	0	0.026	0	0	0	0	0	8.811	0.884	7.927	0.327993	Low	No									0	0	Yes	39.1278	1	Yes	2	0	2.12408	36.7387	38.8628
83	0613	137	6	Baja California Sureste	Rosarito	Baja California Sur	520.694							5.506	0	0.003	0	0	0.003	0	0	0	0	0	5.503	0.551	4.952	0.0605816	Low	No									0	0	Yes	37.1713	1	Yes	2	0	0	50.0012	50.0012
84	0614	130	6	Baja California Sureste	Bahía Concepción	Baja California Sur	1115.25							11.512	0	0.077	0	0	0.077	0	0	0	0	0	11.435	1.151	10.283	0.748809	Low	No									0	0	Yes	1.39624	1	Yes	2	38.2451	0	23.3286	61.5737
85	0701	3	7	Río Colorado	Río Colorado	Baja California, Sonora	6239.6							19.985	1850.23	1729.06	0	0	1729.06	349.472	0	490.304	0	0	0.325	0	0.325	682882	Very high	Yes					1382.63				1382.63	1	Yes	1947.54	1	Yes	100	1424.35	420.642	595.542	2440.53
86	0702	727	7	Río Colorado	Río Santa Cruz	Sonora	909.788							18.958	0	0.049	0	0	0.049	0	0	0	0	0	18.909	1.896	17.013	0.288015	Low	No									0	0	Yes	6.10898	1	Yes	13	45.4643	100.001	165.722	311.188
87	0703	28	7	Río Colorado	Río San Pedro	Sonora	1786.06							35.944	0	0.079	1.349	0	1.428	0	0	0	0	0	34.516	3.594	30.921	4.61822	Low	Yes	0.654436							50.3913	51.0457	1	Yes	1771.28	1	Yes	37	104.432	194.586	583.754	882.772
997	0704	726	7	Río Colorado	Arroyo Los Nogales	Sonora	114.004							2.487	0	0	0	0	0	0	0	0	0	0	2.487	0.249	2.238	0	Low	No									0	0	No	0	0	No					0
89	0801	17	8	Sonora Norte	Río Sonoyta 1	Sonora	4496.41							12.953	0	0.372	0	0	0.372	0	0	0	0	0	12.582	12.582	0	0	Very high	Yes					1816.34				1816.34	1	Yes	23.4673	1	Yes	22	49.7781	45.4826	469.473	564.734
90	0802	12	8	Sonora Norte	Río Sonoyta 2	Sonora	3153.6							16.55	12.582	0.188	0	0	0.188	0	0	28.943	0	0	0	0	0	0	Very high	No									0	0	No	0	0	Yes	31	0	98.5847	690.776	789.36
91	0803	30	8	Sonora Norte	Arroyo Cocóspera	Sonora	2847.69							43.287	0	2.986	0	0	2.986	0	0	0	0	0	40.301	40.301	0	0	Very high	Yes								138.935	138.935	1	Yes	4.70983	1	Yes	44	150.002	225.003	728.145	1103.15
92	0804	24	8	Sonora Norte	Río Magdalena	Sonora	13530.2							49.145	40.301	36.957	0	0	36.957	0	0	26.681	6.106	-0.464	20.166	20.166	0	0	Very high	No									0	0	No	0	0	Yes	202	768.358	1049.5	3225.37	5043.23
93	0805	19	8	Sonora Norte	Río Concepción	Sonora	14649.2							37.444	20.166	24.255	0	0	24.255	0	0	33.355	0	0	0	0	0	0	Very high	Yes	0.956761								0.956761	1	Yes	118.839	1	Yes	87	325.609	321.713	1484.44	2131.76
94	0806	6	8	Sonora Norte	Valle de San Luis	Sonora	5238.48							11.372	0	0	0	0	0	0	0	11.372	0	0	0	0	0	0	Very high	Yes					2555.78				2555.78	1	Yes	12.3055	1	Yes	21	0	0.112161	529.412	529.524
95	0807	9	8	Sonora Norte	Los Vidrios 1	Sonora	3841.62							7.633	0	0	0	0	0	0	0	7.633	0	0	0	0	0	0	Very high	Yes					3830.42				3830.42	1	Yes	338.288	1	Yes	33	0	24.937	789.874	814.811
999	0808	10	8	Sonora Norte	Los Vidrios 2	Sonora	255.116							2.129	0	0	0	0	0	0	0	2.129	0	0	0	0	0	0	Very high	Yes					241.135				241.135	1	No	0	0	No					0
97	0809	45	8	Sonora Norte	Arivaipa - Puerto Libertad	Sonora	7979.34							30.803	0	0.004	0	0	0.004	0	0	30.799	0	0	0	0	0	0	Very high	Yes	0.152198								0.152198	1	Yes	17.4379	1	Yes	41	81.3169	52.9221	868.147	1002.39
98	0901	40	9	Sonora Sur	Río Sonora 1	Sonora	11483.2							127.614	0	37.298	0	0	37.298	0	0	0	0	0	90.316	90.317	0	0	Very high	Yes	116.641						0.860565		117.502	1	Yes	16.0206	1	Yes	184	325.005	821.356	3538.65	4685.01
99	0902	46	9	Sonora Sur	Río San Miguel	Sonora	3815.35							33.38	0	5.613	0	0	5.613	0	0	0	0	0	27.767	27.767	0	0	Very high	No									0	0	No	0	0	Yes	56	0	149.182	1244.63	1393.81
100	0903	52	9	Sonora Sur	Río Sonora 2	Sonora	5942.18							75.358	118.084	74.694	0	0	74.694	0	60.485	85.171	30.099	-0.21	64.173	64.173	0	0	Very high	Yes							264.944		264.944	1	No	0	0	Yes	53	26.7241	36.3521	1263.98	1327.05
101	0904	728	9	Sonora Sur	Río Sonora 3	Sonora	17659.1							98.872	64.173	163.045	0	0	163.045	0	0	0	0	0	-0.001	0	-0.001	0	Very high	Yes	1.30821						0.249898		1.55811	1	Yes	38.4238	1	Yes	149	335.076	210.296	3191.55	3736.92
110	0905	74	9	Sonora Sur	Río Mátape 1	Sonora	3136.96							33.244	0	2.438	0	0	2.438	0	0	0	4.18	-0.005	26.631	11.862	14.769	44.7762	High	No									0	0	No	0	0	Yes	34	25.0005	193.488	594.16	812.648
111	0906	86	9	Sonora Sur	Río Mátape 2	Sonora	5914.65							46.638	26.631	20.133	0.003	0	20.136	0	0	12.5	0	0	40.633	0	40.633	80.319	Very high	Yes	0.537377						1.03859		1.57597	1	Yes	64.0341	1	Yes	29	82.7571	17.3862	643.461	743.604
102	0907	33	9	Sonora Sur	Río Bavispe	Chihuahua, Sonora	14564							526.976	0	457.555	0	0	457.555	3.774	0	0	53.245	-0.572	20.522	20.518	0.004	12755700	Very high	Yes	1725.22				307.576			290.964	2323.76	1	Yes	41.7238	1	Yes	140	1024.22	896.773	1613.38	3534.37
103	0908	49	9	Sonora Sur	Río Yaqui 1	Chihuahua, Sonora	39928.8							2187.84	20.522	1970.89	7.277	0	1978.17	447.212	0	60.485	132.847	40.147	443.922	443.406	0.516	428614	Very high	Yes	7022.47						661.001		7683.47	1	No	0	0	Yes	353	888.641	2778.02	5094.45	8761.11
104	0909	81	9	Sonora Sur	Río Yaqui 2	Chihuahua, Sonora	11744.9							382.623	443.922	1604.22	0	0	1604.22	1876.6	0	0	203.562	1.203	894.16	891.018	3.142	57574.3	Very high	No									0	0	No	0	0	Yes	69	300.004	236.677	1205.86	1742.54
105	0910	112	9	Sonora Sur	Río Yaqui 3	Sonora	6276.41							54.119	894.16	2289.89	250	0	2539.89	1600.57	0	0	0	0	8.957	0	8.957	28356.4	Very high	Yes	12.8351								12.8351	1	Yes	1047.55	1	Yes	96	900.065	289.12	1198.16	2387.35
113	0911	117	9	Sonora Sur	Arroyo Cocoraque 2	Sonora	1033.42							13.529	11.25	1.662	0	0	1.662	0	0	0	0	0	23.117	0	23.117	7.18951	Low	No									0	0	No	0	0	Yes	4	25.1924	18.09	50.0011	93.2836
993	0911	113	9	Sonora Sur	Arroyo Cocoraque 1	Sonora	1183.87							15.443	0	4.193	0	0	4.193	0	0	0	0	0	11.25	0.755	10.495	39.9524	Medium	No									0	0	No	0	0	No					0
106	0913	101	9	Sonora Sur	Río Mayo 1	Chihuahua, Sonora	7658.26							965.053	0	3.256	25.024	0	28.279	2.024	0	0	0	0	938.798	938.748	0.05	56558	Very high	Yes	516.12			57.7565					573.876	1	Yes	0.0485483	1	Yes	16	50.001	73.316	295.486	418.803
107	0914	109	9	Sonora Sur	Arroyo Quiriego	Sonora	1074.87							23.496	0	0.402	0	0	0.402	0.089	0	0	0	0	23.183	23.181	0.001	40200	Very high	No									0	0	No	0	0	Yes	1	0	0	25.0005	25.0005
108	0915	116	9	Sonora Sur	Río Mayo 2	Sonora	2238.01							146.372	961.981	1034.77	0	0	1034.77	0.229	0	0	73.009	0.373	0.425	0.367	0.059	1.87823e+06	Very high	Yes	46.8634								46.8634	1	No	0	0	Yes	7	60.4488	35.7136	98.016	194.178
109	0916	120	9	Sonora Sur	Río Mayo 3	Sonora	4634.02							68.966	0.425	864.488	0	0	864.488	1036.67	0	88.8	0	0	152.774	0	152.774	623.986	Very high	Yes	32.8331								32.8331	1	Yes	67.7227	1	Yes	26	170.982	32.6014	451.909	655.493
114	1001	212	10	Sinaloa	Río Habitas	Sinaloa, Durango	1815.82							372.025	0	0.648	0	0	0.648	0.248	0	0	32.383	8.6	330.641	237.858	92.784	44.8687	High	Yes							28.4334	4.47742	32.9108	1	No	0	0	Yes	37	127.431	203.881	577.391	908.703
115	1002	233	10	Sinaloa	Río Elota	Sinaloa	508.008							95.084	330.641	213.317	33.04	0	246.357	0	0	59.903	0	0	119.466	0	119.466	256.357	Very high	Yes						0.107059			0.107059	1	Yes	0.307396	1	Yes	11	44.5342	51.411	175.559	271.504
116	1003	247	10	Sinaloa	Río Quelite 1	Sinaloa	814.748							101.296	0	0.353	0	0	0.353	0	0	0	0	0	100.942	0.342	100.601	0.350891	Low	No									0	0	No	0	0	Yes	6	9.41201	0.556611	138.79	148.759
117	1004	262	10	Sinaloa	Río Quelite 2	Sinaloa	376.024							50.77	100.942	0.514	0	0	0.514	0	0	0	0	0	151.198	0	151.198	0.339952	Low	Yes	11.4732					0.446599			11.9198	1	Yes	59.2043	1	Yes	1	15.5218	0	6.35845	21.8803
118	1005	165	10	Sinaloa	Río Mocorito 1	Sinaloa	1606.14							148.459	0	3.476	0	0	3.476	0.106	0	0	28.102	-3.222	120.209	116.512	3.697	767	Very high	Yes							3.05274		3.05274	1	No	0	0	Yes	7	0	36.0434	135.677	171.721
119	1006	173	10	Sinaloa	Río Mocorito 2	Sinaloa	851.528							73.852	120.209	405.973	0	0	405.973	2.479	314.945	89.782	0	0	15.73	0	15.73	3151.65	Very high	No									0	0	Yes	9.72698	1	Yes	6	25.5761	13.9578	120.72	160.254
120	1007	188	10	Sinaloa	Río San Lorenzo 1	Durango, Sinaloa	8312.92							1374.9	0	1028.09	0.012	0	1028.11	0	0	0	60.703	23.263	262.83	212.527	50.303	2210.75	Very high	Yes							2.22647		2.22647	1	No	0	0	Yes	164	558.873	1496.83	2031.22	4086.92
121	1008	204	10	Sinaloa	Río San Lorenzo 2	Sinaloa	1669.59							245.207	262.83	714.295	0.049	0	714.343	1022.87	0	523.565	0	0	293	0	293	422.494	Very high	Yes							19.7892		19.7892	1	No	0	0	Yes	10	148.393	16.954	96.435	261.782
122	1009	162	10	Sinaloa	Río Humaya	Sinaloa, Durango, Chihuahua	10899.1							1869.36	0	1284.65	0.153	0	1284.8	0.001	0	351.551	106.579	25.99	100.446	91.169	9.276	19069.9	Very high	Yes							255.056	54.0163	309.072	1	No	0	0	Yes	130	100.656	281.732	2917.61	3300
123	1010	180	10	Sinaloa	Río Tamazula	Sinaloa, Durango	3275.24							758.53	0	530.409	0	0	530.409	0	0	0	40.589	5.958	181.574	164.806	16.768	3440.82	Very high	No									0	0	No	0	0	Yes	26	25.0007	81.6481	536.115	642.764
124	1011	185	10	Sinaloa	Río Culiacán	Sinaloa	2596.83							444.475	282.02	2111.39	5.16	0	2116.55	1850.19	309.419	503.022	0	0	266.532	0	266.532	982.837	Very high	Yes	0.236018						0.298055		0.534073	1	Yes	33.3782	1	Yes	15	46	73.7	267.969	387.669
125	1012	107	10	Sinaloa	Río Fuerte 1	Sonora, Chihuahua, Sinaloa, Durango	26033.1	Río Fuerte	25 de Septiembre de 2016	781.3	25 de Septiembre de 2016	33.24		4024.36	0	3725.68	2.081	31.202	3758.97	1.425	0	0	49.428	121.499	95.898	94.493	1.404	502.092	Very high	Yes	145.694							39.5871	185.281	1	Yes	2.86913	1	Yes	310	391.291	1301.47	6010.16	7702.92
126	1013	135	10	Sinaloa	Río Choix	Chihuahua, Sinaloa	1487.26	Río Fuerte	25 de Septiembre de 2016	102.3				279.238	0	0.768	0	0	0.768	0.474	0	0	0	0	278.943	274.858	4.085	0.721906	Low	No									0	0	No	0	0	Yes	11	0	25.3228	248.973	274.295
127	1014	128	10	Sinaloa	Arroyo Alamos	Sonora, Chihuahua, Sinaloa	1777.68	Río Fuerte	25 de Septiembre de 2016	23.4				94.124	0	0.239	0	0	0.239	0	0	0	0	0	93.885	92.51	1.375	0.964682	Low	Yes	599.753							1.08748	600.84	1	Yes	1.6259	1	Yes	23	39.544	120.626	414.365	574.535
128	1015	132	10	Sinaloa	Río Fuerte 2	Sinaloa, Sonora, Chihuahua	5430.2	Río Fuerte	25 de Septiembre de 2016	113.8				595.043	468.726	6577.58	0	0	6577.58	6822.23	0	839.27	200.244	39.611	229.294	113.8	115.494	3339.25	Very high	Yes	150.995								150.995	1	Yes	1.38897	1	Yes	43	246.148	339.143	482.915	1068.21
129	1016	216	10	Sinaloa	Río Piaxtla 1	Durango, Sinaloa	4853.9							996.843	0	2.54	0	0	2.54	0	0	0	0	0	994.304	6.482	987.822	0.257131	Low	No									0	0	No	0	0	Yes	106	257.345	1028.99	1416.07	2702.4
130	1017	242	10	Sinaloa	Río Piaxtla 2	Sinaloa	2591.09							421.95	994.304	9.192	0.042	0	9.233	0.148	0	0	0	0	1407.17	0	1407.17	0.656141	Low	Yes	486.999					0.412706			487.412	1	Yes	2.63856	1	Yes	44	116.114	458.698	495.128	1069.94
131	1018	141	10	Sinaloa	Río Sinaloa 1	Sinaloa, Chihuahua, Durango	7366.63							1311.35	0	1058.43	0	0	1058.43	0.001	0	0	58.211	26.644	168.068	135.346	32.723	3493.81	Very high	Yes	90.4203						46.0643		136.485	1	No	0	0	Yes	103	100.002	524.278	1949.3	2573.58
994	1019	140	10	Sinaloa	Arroyo Ocoroni	Sinaloa	1419.64							151.147	0	0.144	0	0	0.144	0	0	0	17.432	1.229	132.342	106.575	25.767	72.9809	High	No									0	0	No	0	0	No					0
133	1020	154	10	Sinaloa	Arroyo Cabrera	Sinaloa	627.016							83.401	0	1.307	0	0	1.307	0	0	0	0	0	82.094	66.11	15.984	8.17693	Low	No									0	0	No	0	0	Yes	6	0	0	102.381	102.381
134	1021	153	10	Sinaloa	Río Sinaloa 2	Sinaloa	3738.79							462.184	382.504	1203.39	2.121	0	1205.51	1055.95	0	325.074	0	0	370.051	0	370.051	413.614	Very high	Yes	0.167783						1.38824		1.55602	1	Yes	0.0386543	1	Yes	18	17.519	25.9903	428.344	471.853
995	1022	177	10	Sinaloa	Río Pericos 1	Sinaloa	497.644							49.725	0	0.481	0	0	0.481	0	0	0	0	0	49.244	0.855	48.389	0.994028	Low	No									0	0	No	0	0	No					0
136	1023	178	10	Sinaloa	Río Pericos 2	Sinaloa	1308.37							144.088	49.244	3.367	0	0	3.367	0.692	0	0	0	0	190.658	0	190.658	1.76599	Low	Yes	0.355166								0.355166	1	Yes	109.057	1	Yes	13	149.703	52.034	110.065	311.803
137	1024	133	10	Sinaloa	Grupo de Corrientes Agiabampo	Sonora, Sinaloa	3882.11							89.084	0	22.045	0	0	22.045	1.275	0	0	0	0	68.314	0	68.314	32.2701	Medium	Yes	32.5166								32.5166	1	Yes	885.279	1	Yes	17	127.57	90.0064	279.954	497.531
138	1025	158	10	Sinaloa	Grupo de Corrientes Tpopolobampo	Sinaloa	3191.35							73.484	0	13.015	2.19	0	15.205	5.588	0	0	0	0	63.867	0	63.867	23.8073	Medium	Yes	37.5277						167.078		204.606	1	Yes	585.626	1	Yes	23	166.148	151.589	270.099	587.836
139	1026	164	10	Sinaloa	Grupo de Corrientes Huyaqui	Sinaloa	1327.65							53.771	0	8.505	0	0	8.505	0	0	0	0	0	45.266	0	45.266	18.7889	Medium	No									0	0	Yes	71.1932	1	Yes	10	71.2768	25.0006	148.802	245.08
140	1027	181	10	Sinaloa	Grupo de Corrientes Reforma	Sinaloa	862.977							37.219	0	2.097	0	0	2.097	1.374	0	0	0	0	36.496	0	36.496	5.74584	Low	Yes								16.1776	16.1776	1	Yes	151.28	1	Yes	7	99.5168	8.69051	72.1895	180.397
141	1028	201	10	Sinaloa	Grupo de Corrientes Pabellones	Sinaloa	1739.41							116.014	0	11.654	0	0	11.654	0.364	0	0	0	0	104.725	0	104.725	11.1282	Medium	No									0	0	Yes	103.498	1	Yes	14	101.714	114.761	109.304	325.779
142	1029	221	10	Sinaloa	Grupo de Corrientes Tempehuaya	Sinaloa	1740.4							104.504	0	5.566	0.241	0	5.807	1.001	0	0	0	0	99.698	0	99.698	5.82459	Low	Yes	0.248577					0.0100159			0.258593	1	Yes	8.72077	1	Yes	11	6.13148	40.818	240.715	287.664
143	1030	729	10	Sinaloa	Grupo de Corrientes Altata	Sinaloa	309.979							22.677	0	0.488	0	0	0.488	0.002	0	0	0	0	22.19	0	22.19	2.19919	Low	Yes	0.0435699								0.0435699	1	No	0	0	Yes	2	0	0	70.6185	70.6185
144	1101	298	11	Presidio-San Pedro	Río Cañas 1	Nayarit, Sinaloa	434.913							123.131	0	3.047	0	0	3.047	0	0	0	0	0	120.084	1.297	118.787	2.5651	Low	No									0	0	Yes	105.015	1	Yes	7	20.5234	92.2149	45.6477	158.386
145	1102	307	11	Presidio-San Pedro	Río Cañas 2	Nayarit, Sinaloa	188.754							58.474	120.084	1.872	0.057	0	1.929	0.006	0	0	0	0	176.636	0	176.636	1.09208	Low	No									0	0	Yes	0.779285	1	Yes	3	17.6035	0	81.9124	99.5159
146	1103	186	11	Presidio-San Pedro	Laguna de Santiaguillo	Durango	2454.82	San Pedro Mezquital	9 de Septiembre de 2014	0.32				142.178	0	13.199	0.036	0	13.235	2.756	0	0	84.415	0	47.284	0.32	46.964	206.518	Very high	No									0	0	Yes	225.104	1	Yes	27	379.158	32.4739	297.122	708.755
147	1104	211	11	Presidio-San Pedro	La Tapona	Durango	2761.87	San Pedro Mezquital	9 de Septiembre de 2014	13.29				139.912	0	2.545	0	0	2.545	0.678	0	0	0	0	138.046	13.29	124.756	1.84359	Low	No									0	0	No	0	0	Yes	20	434.101	34.785	91.2362	560.123
148	1105	206	11	Presidio-San Pedro	Río La Sauceda	Durango	2488.76	San Pedro Mezquital	9 de Septiembre de 2014	16.34				141.962	0	22.816	0	0	22.816	4.576	0	0	33.96	2.584	87.178	85.113	2.065	322.521	Very high	No									0	0	Yes	9.65027	1	Yes	22	244.886	25.0007	258.793	528.68
149	1106	225	11	Presidio-San Pedro	Río El Tunal	Durango	1818.94	San Pedro Mezquital	9 de Septiembre de 2014	32.97	9 de Septiembre de 2014	52.27		138.578	0	1.021	0	52.27	53.291	0.842	0	0	7.315	1.139	77.675	75.835	1.84	177.377	Very high	Yes		39.3553					0.515474		39.8708	1	No	0	0	Yes	12	0	13.496	299.469	312.965
150	1107	239	11	Presidio-San Pedro	Río Santiago Bayacora	Durango	1080.82	San Pedro Mezquital	9 de Septiembre de 2014	8.22	9 de Septiembre de 2014	26.38		90.856	0	23.83	0	26.38	50.21	4.782	0	0	7.327	1.338	36.763	35.892	0.871	647.619	Very high	Yes		696.232							696.232	1	No	0	0	Yes	6	108.193	6.00795	39.574	153.775
151	1108	224	11	Presidio-San Pedro	Río Durango	Durango	2149.41	San Pedro Mezquital	9 de Septiembre de 2014	34.67				112.771	201.617	91.804	0.044	0	91.848	28.52	0	0	0	0	251.06	242.937	8.123	214.633	Very high	Yes		135.664							135.664	1	No	0	0	Yes	43	875.419	126.076	94.413	1095.91
152	1109	234	11	Presidio-San Pedro	Río Poanas	Durango, Zacatecas	1495.02	San Pedro Mezquital	9 de Septiembre de 2014	14.65				64.35	0	35.488	0.001	0	35.49	7.1	0	0	5.762	1.52	28.679	27.751	0.928	274.567	Very high	Yes				9.10073					9.10073	1	No	0	0	Yes	9	0	17.6401	188.212	205.852
153	1110	258	11	Presidio-San Pedro	Río Suchil	Zacatecas, Durango	1800.71	San Pedro Mezquital	9 de Septiembre de 2014	1.82				36.667	0	15.057	0.031	0	15.088	3.102	0	0	0	0	24.681	23.883	0.799	576.098	Very high	Yes		45.3921							45.3921	1	No	0	0	Yes	9	28.4923	6.97675	215.526	250.995
154	1111	251	11	Presidio-San Pedro	Río Graseros	Zacatecas, Durango	598.966	San Pedro Mezquital	9 de Septiembre de 2014	2.49				15.534	0	0.133	0	0	0.133	0.024	0	0	0	0	15.425	14.926	0.499	4.44965	Low	Yes		17.9208			172.62				190.541	1	No	0	0	Yes	3	46.0552	0	37.3103	83.3655
155	1112	236	11	Presidio-San Pedro	Río San Pedro-Mezquital	Nayarit, Durango, Zacatecas	11629.1	San Pedro Mezquital	9 de Septiembre de 2014	354.74	9 de Septiembre de 2014	50		2245.05	319.845	1979.9	0	49.926	2029.82	5.566	0	0	0	0	540.642	457.477	83.165	463.53	Very high	Yes		5794.23		2.0298	92.3039				5888.57	1	No	0	0	Yes	213	746.511	1821.58	2775.6	5343.69
156	1113	338	11	Presidio-San Pedro	Río San Pedro-Desembocadura	Nayarit	808.179	San Pedro Mezquital	9 de Septiembre de 2014	2296.66				269.663	540.642	59.495	0	0	59.495	1974.18	0	0	0	0	2724.99	2296.66	428.326	2.18331	Low	Yes					172.763				172.763	1	Yes	298.486	1	Yes	19	165.087	140.2	191.855	497.142
157	1114	252	11	Presidio-San Pedro	Río Baluarte 1	Sinaloa, Nayarit, Durango	4621.48							1671.09	0	7.958	0.566	0	8.524	0.681	0	0	0	0	1663.24	25.556	1637.69	0.52049	Low	Yes							20.1926		20.1926	1	No	0	0	Yes	120	600.017	1037.55	1422.05	3059.61
158	1115	287	11	Presidio-San Pedro	Río Baluarte 2	Sinaloa	495.473							186.915	1663.24	28.428	0	0	28.428	0.001	0	0	0	0	1821.73	0	1821.73	1.56049	Low	Yes	0.711613								0.711613	1	Yes	144.329	1	Yes	18	25.5968	188.113	205.16	418.87
159	1116	230	11	Presidio-San Pedro	Río Presidio 1	Sinaloa, Durango	5326.1		30 de Abril de 2008					1004.13	0	3.717	0	0	3.717	0	0	327.7	0	0	672.714	271.156	401.558	82.5328	Very high	Yes							37.2063		37.2063	1	No	0	0	Yes	110	502.527	746.071	1449.71	2698.31
160	1117	266	11	Presidio-San Pedro	Río Presidio 2	Sinaloa	500.599		30 de Abril de 2008					73.926	672.714	92.343	327.7	0	420.043	0	327.7	0	0	0	654.298	13	641.298	65.4989	High	No									0	0	Yes	11.5827	1	Yes	4	1.71128	0	120.948	122.66
161	1118	245	11	Presidio-San Pedro	Río Acaponeta 1	Nayarit, Durango, Sinaloa	5091.73							1357.01	0	3.246	0.032	0	3.278	1.158	0	0	0	0	1354.89	3.283	1351.61	0.242526	Low	Yes		10.9859					0.332671		11.3186	1	No	0	0	Yes	114	466.524	1215.99	1253.57	2936.09
162	1119	311	11	Presidio-San Pedro	Río Acaponeta 2	Nayarit	249.942							78.24	1354.89	2.219	1.259	0	3.478	2.181	0	0	0	0	1431.83	0	1431.83	0.242905	Low	Yes					9.85249				9.85249	1	Yes	51.1644	1	Yes	9	66.3257	43.0028	93.673	203.001
163	1120	318	11	Presidio-San Pedro	Río Rosa Morada 1	Nayarit	228.865							80.087	0	0.437	0.001	0	0.437	0.106	0	0	0	0	79.756	4.049	75.707	0.577225	Low	No									0	0	No	0	0	Yes	9	25.0008	78.7069	98.1626	201.87
164	1121	327	11	Presidio-San Pedro	Río Rosa Morada 2	Nayarit	195.724							66.5	79.756	7.666	0	0	7.666	4.728	0	0	0	0	143.318	0	143.318	5.34894	Low	Yes					0.078804				0.078804	1	Yes	3.60855	1	Yes	5	21.463	14.2457	80.6745	116.383
165	1122	319	11	Presidio-San Pedro	Río Bejuco 1	Nayarit	339.003							147.972	0	0.795	0	0	0.795	0.175	0	0	0	0	147.352	6.089	141.263	0.56278	Low	Yes		91.6835							91.6835	1	No	0	0	Yes	10	25.0008	130.854	99.3879	255.243
166	1123	331	11	Presidio-San Pedro	Río Bejuco 2	Nayarit	132.875							51.402	147.352	8.567	0	0	8.567	8.567	0	0	0	0	198.754	0	198.754	4.31035	Low	No									0	0	No	0	0	Yes	4	1.86911	57.7333	52.4367	112.039
167	1124	272	11	Presidio-San Pedro	Grupo de Corrientes Mazatlan	Sinaloa	293.121							21.501	0	0.006	0	0	0.006	0.005	0	0	0	0	21.499	0	21.499	0.0279083	Low	Yes								0.0991288	0.0991288	1	Yes	0.581852	1	Yes	2	43.0385	0	13.3039	56.3423
168	1125	284	11	Presidio-San Pedro	Grupo de Corrientes Huizache	Sinaloa	652.159							52.968	0	0.084	0	0	0.084	0.014	0	0	0	0	52.897	0	52.897	0.158799	Low	No									0	0	Yes	265.46	1	Yes	10	132.05	99.1532	38.7101	269.913
169	1126	326	11	Presidio-San Pedro	Grupo de Corrientes Marismas Nacionales	Sinaloa, Nayarit	3592.5							554.476	0	295.489	4.569	0	300.058	0.059	0	0	0	0	254.477	0	254.477	117.912	Very high	Yes					1009.26				1009.26	1	Yes	2210.54	1	Yes	96	1273.24	455.476	616.358	2345.08
170	1201	481	12	Lerma-Santiago	Río Lerma 1	Estado de México, Ciudad de México	2058.31							228.529	0	94.439	0.502	0	94.941	65.656	44.371	0	12.157	-0.575	232.033	232.033	0	0	Very high	Yes	229.816			15.7649			1074.8		1320.38	1	Yes	30.0986	1	Yes	53	383.092	697.785	224.891	1305.77
171	1202	484	12	Lerma-Santiago	Río La Gavia	Estado de México	492.977							104.118	0	31.535	0.584	0	32.119	4.056	0	0	12.774	0.004	63.277	63.277	0	0	Very high	Yes	37.36	0.762539					1.53598		39.6585	1	No	0	0	Yes	15	103.623	243.983	32.6665	380.272
172	1203	470	12	Lerma-Santiago	Río Jaltepec	Michoacán de Ocampo, Estado de México	362.945							92.501	0	32.756	1.056	0	33.812	5.322	0	0	14.351	0.904	48.756	48.756	0	0	Very high	Yes					11.9846		8.1441		20.1287	1	No	0	0	Yes	5	0	15.4282	113.55	128.978
173	1204	448	12	Lerma-Santiago	Río Lerma 2	Estado de México, Querétaro de Arteaga, Michoacán de Ocampo, Guanajuato,	2677.41							386.84	344.067	594.461	0.612	0	595.074	16.712	0	0	74.511	2.486	75.548	75.549	-0.001	0	Very high	Yes					8.67456		727.067		735.741	1	No	0	0	Yes	28	215.269	178.176	346.485	739.931
174	1205	437	12	Lerma-Santiago	Río Lerma 3	Guanajuato, Querétaro de Arteaga, Michoacán de Ocampo, Estado de México	2877.87							475.613	75.548	950.637	0.567	0	951.204	501.441	0	0	91.506	6.517	3.376	3.384	-0.008	0	Very high	Yes				0.254988	79.5257		24.3146		104.095	1	No	0	0	Yes	20	0	48.9041	471.24	520.144
179	1206	419	12	Lerma-Santiago	Río Lerma 4	Guanajuato, Michoacán de Ocampo	2609.45							102.836	119.542	436.864	0.005	0	436.869	761.593	118.255	587.908	6.417	0	71.032	73.485	-2.453	0	Very high	Yes							487.261		487.261	1	Yes	0.00682581	1	Yes	61	206.163	631.691	653.371	1491.23
175	1207	365	12	Lerma-Santiago	Río La Laja 1	Guanajuato, Querétaro de Arteaga, San Luis Potosí	6934.2							251.617	0	108.503	0.6	0	109.103	16.127	0	0	52.416	1.973	104.252	104.357	-0.105	0	Very high	Yes					9.46552		472.712	21.908	504.086	1	No	0	0	Yes	15	95.097	40.0414	261.129	396.267
176	1208	398	12	Lerma-Santiago	Río Querétaro	Querétaro de Arteaga, Guanajuato, Michoacán de Ocampo	2486.49							105.229	0	121.643	0.004	0	121.647	66.068	0	0	12.111	0	37.539	37.577	-0.038	0	Very high	Yes				25.1927			148.492		173.684	1	No	0	0	Yes	3	22.7664	0	50.0017	72.7681
177	1209	401	12	Lerma-Santiago	Río La Laja 2	Guanajuato, Querétaro de Arteaga, Michoacán de Ocampo	2570.8							77.311	141.791	138.535	0.306	0	138.841	38.409	0	0	2.504	0	116.166	116.424	-0.259	0	Very high	Yes							218.075	27.1218	245.197	1	No	0	0	Yes	8	0	0	192.616	192.616
178	1210	435	12	Lerma-Santiago	Laguna de Yuriria	Michoacán de Ocampo, Guanajuato	1119.45							188.609	0	4.533	0	0	4.533	1.278	96.698	118.255	169.965	-3.65	-2.518	0	-2.518	0	Very high	Yes							238.34		238.34	1	Yes	150.03	1	Yes	37	614.529	164.786	147.622	926.937
180	1211	377	12	Lerma-Santiago	Río Turbio	Jalisco, Guanajuato	2811.66							183.395	0	187.34	0	0	187.34	115.779	0	0	19.408	0	92.426	95.618	-3.192	0	Very high	Yes							224.647		224.647	1	Yes	38.9091	1	Yes	64	96.6991	437.582	1041.01	1575.29
181	1212	450	12	Lerma-Santiago	Río Angulo	Guanajuato, Michoacán de Ocampo	2069.22							352.204	0	276.352	0	0	276.352	213.908	0	0	36.8	0.526	252.433	261.151	-8.718	0	Very high	Yes							1.96856		1.96856	1	Yes	1.20725	1	Yes	58	941.162	390.136	150.172	1481.47
182	1213	374	12	Lerma-Santiago	Río Lerma 5	Guanajuato, Michoacán de Ocampo, Jalisco	7545.97							279.948	415.891	680.984	1.63	0	682.614	117.801	491.21	0	27.5	0	594.736	639.799	-45.062	0	Very high	Yes							1118.59		1118.59	1	Yes	0.0799793	1	Yes	126	183.2	804.678	2146.8	3134.68
183	1214	423	12	Lerma-Santiago	Río Lerma 6	Michoacán de Ocampo, Jalisco, Guanajuato	2046.6							307.195	594.736	295.745	0	0	295.745	29.763	0	92.39	27.107	0	516.452	587.045	-70.593	0	Very high	Yes							342.054		342.054	1	No	0	0	Yes	37	172.685	223.101	565.974	961.76
185	1215	400	12	Lerma-Santiago	Río Zula	Jalisco	1982.24							209.175	0	80.041	0	0	80.041	9.499	0	0	10.982	0	127.651	145.1	-17.448	0	Very high	Yes							33.5479		33.5479	1	No	0	0	Yes	29	93.912	299.35	351.455	744.717
184	1216	742	12	Lerma-Santiago	Río Duero	Michoacán de Ocampo	2066.1							504.67	0	490.115	0	0	490.115	266.176	0	0	6.295	0	274.435	311.948	-37.512	0	Very high	Yes				0.0538166					0.0538166	1	No	0	0	Yes	43	379.034	273.2	378.01	1030.24
186	1217	409	12	Lerma-Santiago	Río Lerma 7	Jalisco, Michoacán de Ocampo	5292.94							787.314	918.539	445.781	0	0	445.781	35.629	92.39	325.71	1391.73	-78.679	-250.669	0	-250.669	0	Very high	Yes							127.574		127.574	1	Yes	1125.77	1	Yes	133	1232.26	927.966	1188.03	3348.25
187	1218	473	12	Lerma-Santiago	Lago de Pátzcuaro	Michoacán de Ocampo	919.067							69.58	0	27.496	0	0	27.496	2.924	0	0	105.93	0	-60.922	0	-60.922	0	Very high	Yes							2.94756		2.94756	1	Yes	7.02206	1	Yes	29	623.117	40.9667	45.4285	709.512
188	1219	451	12	Lerma-Santiago	Lago de Cuitzeo	Michoacán de Ocampo, Guanajuato	3847.61							488.54	0	177.702	0.013	0	177.715	98.922	0	0	443.293	-2.017	-31.529	0	-31.529	0	Very high	Yes				22.6476			78.8345		101.482	1	Yes	0.56434	1	Yes	126	2691.28	256.875	188.168	3136.32
189	1220	304	12	Lerma-Santiago	Río San Pedro	Aguascalientes, Zacatecas	2675.3	Santiago	6 de Junio de 2018	33.18	6 de Junio de 2018	3.75		85.521	69.973	75.154	0.061	3.75	78.965	7.655	0	14.165	0	0	70.019	70.013	0.006	280.63	Very high	Yes		485.343					110.121		595.464	1	No	0	0	Yes	14	52.4532	126.963	202.148	381.565
190	1221	324	12	Lerma-Santiago	Presa Calles	Aguascalientes, Zacatecas	592.288	Santiago	6 de Junio de 2018	0.8				78.137	0	4.096	0.048	0	4.144	0.604	127.695	113.53	14.063	4.726	69.973	69.97	0.003	16994.1	Very high	Yes		421.17					420.492	60.9356	902.597	1	No	0	0	Yes	7	0	48.5045	118.646	167.151
191	1222	313	12	Lerma-Santiago	Presa El Niágara	Aguascalientes, Zacatecas, Jalisco	2342.92	Santiago	6 de Junio de 2018	41.59	6 de Junio de 2018	115.414		41.302	70.019	57.942	0.404	115.41	173.755	7.219	113.53	0	7.197	0.114	51.003	50.983	0.02	435.15	Very high	Yes		56.2291					100.387	4.53132	161.148	1	No	0	0	Yes	15	97.0804	29.6191	272.041	398.74
192	1223	346	12	Lerma-Santiago	Presa El Cuarenta	Jalisco, Guanajuato, Zacatecas, San Luis Potosí	2308.77	Santiago	6 de Junio de 2018	1	6 de Junio de 2018	0.358		61.996	0	25.766	0.942	0.358	27.065	2.795	0	0	2.586	-0.176	35.316	35.305	0.011	2915.43	Very high	Yes							483.218		483.218	1	No	0	0	Yes	18	128.322	51.3592	266.776	446.457
193	1224	358	12	Lerma-Santiago	Río de Lagos	Jalisco, Guanajuato	2741.54	Santiago	6 de Junio de 2018	2.33	6 de Junio de 2018	2.678		131.679	35.316	47.208	2.917	2.678	52.804	5.202	0	0	9.728	0	109.665	109.609	0.056	2620.79	Very high	Yes							0.222896	1.52464	1.74754	1	No	0	0	Yes	45	120.933	383.077	647.597	1151.61
194	1225	349	12	Lerma-Santiago	Presa Ajojucar	Aguascalientes, Jalisco	794.444	Santiago	6 de Junio de 2018	17.64	6 de Junio de 2018	0.044		57.144	51.003	14.274	0.641	0.044	14.959	1.559	0	0	2.315	0	92.432	92.39	0.043	97.687	Very high	Yes		0.604232					89.6185		90.2227	1	Yes	0.343796	1	Yes	6	0	20.089	146.045	166.134
195	1226	361	12	Lerma-Santiago	Río Grande	Jalisco	577.255	Santiago	6 de Junio de 2018	4.06	6 de Junio de 2018	0.386		21.569	0	1.529	0.614	0.386	2.529	0.229	0	0	1.615	0	17.654	17.646	0.008	101.868	Very high	No									0	0	No	0	0	Yes	5	0	0	120.187	120.187
196	1227	342	12	Lerma-Santiago	Río Encarnación	Aguascalientes, Jalisco	2652.23	Santiago	6 de Junio de 2018	14.65	6 de Junio de 2018	2.931		100.647	0	27.494	2.476	2.931	32.901	3.097	0	0	12.405	0	58.438	58.411	0.027	308.687	Very high	Yes							5.07682	21.1453	26.2221	1	No	0	0	Yes	26	181.192	154	388.451	723.643
197	1228	356	12	Lerma-Santiago	Río Aguascalientes	Zacatecas, Aguascalientes, Jalisco	660.788	Santiago	6 de Junio de 2018	79.75	6 de Junio de 2018	0.025		32.833	168.525	15.396	0.734	0.025	16.155	2.317	0	0	3.199	0	184.321	184.227	0.094	24.2398	Medium	Yes							0.103122		0.103122	1	No	0	0	Yes	11	0	23.174	228.658	251.832
198	1229	380	12	Lerma-Santiago	Río San Miguel	Jalisco	1105.29	Santiago	6 de Junio de 2018	12.02	6 de Junio de 2018	0.569		74.036	0	4.093	1.176	0.569	5.837	0.673	0	0	2.268	0	66.604	66.57	0.034	67.2391	High	No									0	0	No	0	0	Yes	20	20.582	220.936	262.703	504.221
199	1230	392	12	Lerma-Santiago	Río del Valle	Jalisco	763.084	Santiago	6 de Junio de 2018	6.75	6 de Junio de 2018	1.849		60.704	0	12.359	0.812	27.524	40.694	9.148	0	0	10.989	0	18.169	18.16	0.009	764.655	Very high	No									0	0	No	0	0	Yes	18	17.1068	112.843	304.948	434.898
200	1231	357	12	Lerma-Santiago	Río Verde 1	Zacatecas, Jalisco	2128.68	Santiago	6 de Junio de 2018	209.44	6 de Junio de 2018	0.889		164.452	378.758	26.383	1.395	0.889	28.667	3.342	0	119.837	3.752	0	394.297	394.018	0.279	72.6	High	No									0	0	No	0	0	Yes	53	50.0016	591.269	640.26	1281.53
201	1232	390	12	Lerma-Santiago	Río Verde 2	Jalisco	1378.15	Santiago	6 de Junio de 2018	307.25	6 de Junio de 2018	2.262		187.33	394.297	201.06	1.466	159.042	361.568	5.977	0	0	4.573	0	221.463	221.047	0.415	119.006	Very high	Yes							134.747		134.747	1	No	0	0	Yes	24	7.89406	176.012	423.468	607.374
202	1233	310	12	Lerma-Santiago	Río Palomas	Zacatecas	343.725	Santiago	6 de Junio de 2018	1.3	6 de Junio de 2018	0.04		29.112	0	0.655	0	0.04	0.695	0.066	0	0	1.544	0	26.939	26.937	0.002	171.966	Very high	Yes		141.625					10.1566		151.782	1	No	0	0	Yes	5	0	13.7481	137.88	151.628
203	1234	302	12	Lerma-Santiago	Presa El Chique	Aguascalientes, Jalisco, Zacatecas	2369.31	Santiago	6 de Junio de 2018	9.46	6 de Junio de 2018	0.927		95.452	26.939	48.327	0.388	0.927	49.642	5	0	0	11.481	-0.167	66.435	66.423	0.011	643.607	Very high	Yes		333.295					463.053		796.348	1	No	0	0	Yes	21	50.0016	42.5532	424.032	516.586
204	1235	328	12	Lerma-Santiago	Río Juchipila 1	Aguascalientes, Zacatecas, Jalisco	3113.03	Santiago	6 de Junio de 2018	23.13				149.129	66.435	87.636	1.021	0	88.657	9.135	0	113.53	6.499	-0.08	16.093	16.055	0.038	900.406	Very high	Yes		629.174					655.525		1284.7	1	No	0	0	Yes	12	0	24.7638	236.435	261.199
205	1236	360	12	Lerma-Santiago	Río Juchipila 2	Zacatecas, Jalisco	2563.92	Santiago	6 de Junio de 2018	45.81	6 de Junio de 2018	0.046		186.365	16.093	20.353	1.995	0.046	22.393	3.428	0	0	0.937	0	182.555	182.072	0.483	50.3964	High	Yes		876.583							876.583	1	No	0	0	Yes	26	75.0025	141.652	462.446	679.1
206	1237	403	12	Lerma-Santiago	Río Santiago 1	Jalisco	2945.41	Santiago	6 de Junio de 2018	209.65	6 de Junio de 2018	14.036		474.193	0	1877.52	0	14.036	1891.56	1746.32	168.396	0	38.927	0.308	458.116	457.257	0.859	917.203	Very high	Yes	40.9003						254.442		295.343	1	No	0	0	Yes	50	40.2627	339.073	853.313	1232.65
207	1238	391	12	Lerma-Santiago	Río Santiago 2	Jalisco	1450.65	Santiago	6 de Junio de 2018	591.85	6 de Junio de 2018	70.743		385.853	679.579	384.996	0	70.743	455.739	357.012	157.314	0	3.996	0	1120.02	1117.06	2.964	77.2905	High	Yes	18.5694	23.0257					140.51		182.106	1	No	0	0	Yes	27	87.5749	327.728	278.686	693.99
208	1239	367	12	Lerma-Santiago	Presa Santa Rosa	Jalisco, Zacatecas	1939.86	Santiago	6 de Junio de 2018	1123.91	6 de Junio de 2018	2.585		446.638	1302.58	1574.16	2.456	2.585	1579.2	1560.92	0	0	15.53	6.319	1709.09	1700.33	8.759	141.352	Very high	Yes	21.0164	19.724					85.9257		126.666	1	No	0	0	Yes	34	171.157	170.54	535.966	877.663
209	1240	373	12	Lerma-Santiago	Río Santiago 3	Jalisco, Zacatecas, Nayarit	1852.04	Santiago	6 de Junio de 2018	1061.53	6 de Junio de 2018	3.743		401.491	1709.09	3.966	0	3.743	7.709	1.323	0	0	0.341	0	2103.85	2093.03	10.823	0.750686	Low	Yes		348.544							348.544	1	No	0	0	Yes	23	72.6998	251.693	274.117	598.51
210	1241	294	12	Lerma-Santiago	Río Tepetongo	Jalisco, Zacatecas	3057.6	Santiago	6 de Junio de 2018	5.76	6 de Junio de 2018	3.661		84.203	0	42.044	0.438	3.661	46.143	4.388	0	0	10.438	0.461	31.549	31.392	0.157	964.036	Very high	Yes		14.9102					249.044		263.955	1	No	0	0	Yes	41	25.0008	231.653	747.14	1003.79
211	1242	334	12	Lerma-Santiago	Río Tlaltenango	Zacatecas, Jalisco	2550.23	Santiago	6 de Junio de 2018	32.18	6 de Junio de 2018	0.213		242.191	0	75.184	0.1	0.213	75.497	8.263	0	0	7.96	1.258	165.739	164.912	0.826	256.665	Very high	Yes		493.343							493.343	1	No	0	0	Yes	25	0	197.968	430.211	628.179
212	1243	289	12	Lerma-Santiago	Arroyo Lobatos	Zacatecas	1780.66	Santiago	6 de Junio de 2018	3.72				65.279	0	6.981	0.551	0	7.532	0.902	0	0	1.015	0.001	57.633	57.346	0.287	213.327	Very high	Yes		472.075							472.075	1	No	0	0	Yes	25	0	58.0789	573.536	631.615
213	1244	299	12	Lerma-Santiago	Río Bolaños 1	Zacatecas, Jalisco	4434.14	Santiago	6 de Junio de 2018	71.44	6 de Junio de 2018	0.6		392.703	254.922	13.192	0	0.6	13.792	2.043	0	0	1.932	0	633.944	630.704	3.239	21.0555	Medium	Yes		627.049					3.10096	0.434209	630.584	1	No	0	0	Yes	74	312.109	763.413	782.383	1857.9
214	1245	341	12	Lerma-Santiago	Río Bolaños 2	Jalisco, Zacatecas, Nayarit	2939.32	Santiago	6 de Junio de 2018	134.69	6 de Junio de 2018	0.678		285.894	633.944	4.488	0	0.678	5.166	1.29	0	0	0.989	0	914.973	910.266	4.707	4.41545	Low	Yes		961.174							961.174	1	No	0	0	Yes	24	20.4073	238.701	350.142	609.25
215	1246	269	12	Lerma-Santiago	Río San Juan	Zacatecas, Jalisco, Durango	5650.15	Santiago	6 de Junio de 2018	5.76	6 de Junio de 2018	0.151		406.664	0	51.723	52.701	0.151	104.575	75.871	0	0	1.7	0	376.26	362.081	14.179	533.001	Very high	Yes		2798.68			81.4293				2880.11	1	No	0	0	Yes	142	972.497	1595.68	980.926	3549.1
216	1247	306	12	Lerma-Santiago	Río Atengo	Zacatecas, Jalisco, Durango, Nayarit	6146.73	Santiago	6 de Junio de 2018	276.6	6 de Junio de 2018	3.801		762.675	376.26	3.037	0.008	3.797	6.842	1.096	0	0	0.645	0	1132.54	1089.58	42.96	2.34291	Low	Yes		1673.33						3.26253	1676.59	1	No	0	0	Yes	112	252.856	1416.57	1032.62	2702.04
217	1248	292	12	Lerma-Santiago	Río Jesús María	Nayarit, Durango, Zacatecas	3086.89	Santiago	6 de Junio de 2018	107.97	6 de Junio de 2018	0.114		370.41	0	0.748	0	0.113	0.861	0.561	0	0	0	0	370.11	356.153	13.957	0.70616	Low	Yes		131.974							131.974	1	No	0	0	Yes	62	315.805	707.229	541.304	1564.34
218	1249	308	12	Lerma-Santiago	Río Huaynamota	Nayarit, Jalisco	2036.12	Santiago	6 de Junio de 2018	200.99	6 de Junio de 2018	2.927		242.99	370.11	0.722	0	2.877	3.598	0.541	0	0	0	0	610.043	586.902	23.141	1.60531	Low	Yes		22.9498							22.9498	1	No	0	0	Yes	43	127.638	452.288	479.087	1059.01
219	1250	348	12	Lerma-Santiago	Río Santiago 4	Nayarit, Jalisco	2239.78	Santiago	6 de Junio de 2018	1933.28	6 de Junio de 2018	0.794		351.153	3018.82	5413.21	0	0.67	5413.88	2955.99	0	0	53.155	1.005	857.927	825.384	32.543	278.155	Very high	Yes		1017.72							1017.72	1	No	0	0	Yes	35	100.985	470.454	318.036	889.474
220	1251	755	12	Lerma-Santiago	Río Santiago 5	Nayarit	2558.79	Santiago	6 de Junio de 2018	2332.89	6 de Junio de 2018	2.721		402.327	2600.51	4172.8	0	2.632	4175.43	2457.99	0	0	132.691	-11.532	1164.24	957.096	207.144	169.155	Very high	Yes		1758.66							1758.66	1	No	0	0	Yes	59	271.89	686.111	515.527	1473.53
221	1252	337	12	Lerma-Santiago	Río Santiago 6	Nayarit	2072.27	Santiago	6 de Junio de 2018	3705.14	6 de Junio de 2018	68.644		734.065	1164.24	4677.81	0.002	68.448	4746.26	8591.34	0	167.625	4.286	0	5571.48	3705.14	1866.34	88.274	Very high	Yes		353.608					51.3993	3.66564	408.673	1	Yes	94.6438	1	Yes	46	310.792	307.278	479.491	1097.56
222	1253	417	12	Lerma-Santiago	Laguna Villa Corona A	Jalisco	343.443							35.93	0	1.664	0	0	1.664	0.719	0	0	7.192	-0.15	27.943	27.943	0	0	Very high	Yes	43.0093						23.7951		66.8044	1	No	0	0	Yes	9	101.234	6.04793	100.632	207.913
223	1254	427	12	Lerma-Santiago	Laguna Villa Corona B	Jalisco	399.428							62.5	27.943	20.366	0	0	20.366	2.037	0	0	50.062	0	22.052	22.052	0	0	Very high	Yes							38.1383		38.1383	1	Yes	21.4817	1	Yes	11	67.5994	18.9527	193.696	280.248
224	1255	432	12	Lerma-Santiago	Laguna San Marcos-Zacoalco	Jalisco	464.99							47.09	0	0.109	0	0	0.109	0.082	0	0	71.852	0	-24.789	0	-24.789	0	Very high	No									0	0	No	0	0	Yes	6	27.0404	0	119.337	146.377
225	1256	454	12	Lerma-Santiago	Laguna de Sayula A	Jalisco	147.873							12.67	0	0.196	0	0	0.196	0.101	0	0	2.092	0.784	9.699	11.46	-1.761	0	Very high	No									0	0	No	0	0	Yes	1	6.35598	0	27.8366	34.1926
226	1257	446	12	Lerma-Santiago	Laguna de Sayula B	Jalisco	1338.17							204.18	9.699	36.017	0	0	36.017	4.303	0	0	221.393	0.389	-39.616	0	-39.616	0	Very high	No									0	0	Yes	113.618	1	Yes	21	25.204	94.8374	360.583	480.625
227	1258	461	12	Lerma-Santiago	Laguna de Zapotlán	Jalisco	474.697							76	0	3.164	0.077	0	3.241	1.266	0	0	17.198	0	56.827	45.54	11.287	181.084	Very high	Yes				2.8823			0.453276		3.33558	1	Yes	14.8765	1	Yes	4	90.2783	0	39.2561	129.534
228	1301	364	13	Río Huicicila	Ixtapa	Nayarit	487.471							132.633	0	21.73	0.152	0	21.882	5.377	0	0	0	0	116.128	0	116.128	18.843	Medium	Yes							65.313	0.495624	65.8086	1	No	0	0	Yes	16	69.8898	133.37	204.714	407.974
229	1302	410	13	Río Huicicila	Pitillal	Jalisco	431.851							98.63	0	0.099	0	0	0.099	0.028	0	0	0	0	98.559	0	98.559	0.100447	Low	Yes							1.66689		1.66689	1	No	0	0	Yes	13	113.923	84.2414	124.354	322.518
230	1303	413	13	Río Huicicila	Cuale	Jalisco	266.625							90.896	0	8.108	0	0	8.108	5.857	0	0	0	0	88.646	0	88.646	9.14649	Low	No									0	0	No	0	0	Yes	9	78.5441	79.4353	75.7403	233.72
231	1304	362	13	Río Huicicila	San Blas	Nayarit	926.309							319.859	0	244.308	0.34	0	244.648	96.477	167.625	0	0	0	339.313	0	339.313	72.101	High	Yes							35.2228		35.2228	1	Yes	185.703	1	Yes	14	212.143	12.3551	152.049	376.547
232	1305	369	13	Río Huicicila	Huicicila	Nayarit	1796.01							457.469	0	40.976	0.264	0	41.24	9.857	0	0	0	0	426.086	0	426.086	9.6788	Low	Yes		13.7595					433.955	0.738777	448.453	1	No	0	0	Yes	34	95.7591	142.468	583.753	821.98
233	1306	415	13	Río Huicicila	Tecomala	Jalisco	768.124							230.58	0	2.884	0	0	2.884	1.492	0	0	0	0	229.188	0	229.188	1.25836	Low	No									0	0	No	0	0	Yes	29	293.416	223.298	165.701	682.416
234	1401	395	14	Río Ameca	Salado	Jalisco	1511.62	Ameca	6 de Junio de 2018	14.929	6 de Junio de 2018	10.096		259.034	0	44.547	0	9.532	54.08	10.162	0	0	18.748	2.249	194.12	167.065	27.055	178.823	Very high	Yes	179.854	4.4411					91.0976		275.393	1	Yes	18.0866	1	Yes	41	678.553	162.596	142.291	983.44
235	1402	414	14	Río Ameca	Cocula	Jalisco	1160.07	Ameca	6 de Junio de 2018	244.515				184.582	194.12	79.288	0	0	79.288	16.17	0	0	0	0	315.584	260.55	55.034	26.4691	Medium	Yes	31.7818						45.0006		76.7824	1	No	0	0	Yes	19	277.354	14.6287	185.383	477.365
236	1403	379	14	Río Ameca	Ahuacatlán	Nayarit, Jalisco	1275.15	Ameca	6 de Junio de 2018	92.939				207.21	0	23.102	0	0	23.102	7.997	0	0	0	0	192.105	158.605	33.501	18.2711	Medium	Yes		226.5							226.5	1	No	0	0	Yes	12	60.6068	11.9719	200.827	273.406
237	1404	397	14	Río Ameca	Atenguillo	Nayarit, Jalisco	1878.7	Ameca	6 de Junio de 2018	120.066				205.157	0	4.598	0	0	4.598	1.682	0	0	0	0	202.241	166.973	35.268	2.96007	Low	Yes		998.915							998.915	1	No	0	0	Yes	45	112.347	272.053	716.077	1100.48
238	1405	388	14	Río Ameca	Ameca Pijinto	Nayarit, Jalisco	2604.79	Ameca	6 de Junio de 2018	869				366.837	709.93	21.73	0	0	21.73	5.413	0	0	0	0	1060.45	871.732	188.718	2.05442	Low	Yes	0.207577	848.693					72.2802		921.181	1	No	0	0	Yes	53	375.238	439.731	541.005	1355.97
239	1406	384	14	Río Ameca	Ameca Ixtapa A	Nayarit, Jalisco	1450.22	Ameca	6 de Junio de 2018	1128.94				357.684	1060.45	2.69	0	0	2.69	0.841	0	0	0	0	1416.28	1163.76	252.521	0.194722	Low	Yes		1132.98					89.1203	1.49753	1223.6	1	No	0	0	Yes	32	109.728	385.165	325.071	819.965
240	1407	416	14	Río Ameca	Talpa	Jalisco	590.644	Ameca	6 de Junio de 2018	30.655	6 de Junio de 2018	0.542		70.826	0	0.262	0	0.542	0.804	0.131	0	0	0	0	70.153	60.088	10.065	1.97446	Low	Yes							1.04246		1.04246	1	No	0	0	Yes	16	115.293	221.753	38.4002	375.447
241	1408	408	14	Río Ameca	Mascota	Jalisco	1427.84	Ameca	6 de Junio de 2018	193.213	6 de Junio de 2018	0.374		398.9	70.153	107.768	0.114	0.374	108.256	85.156	0	0	0	0	445.953	366.44	79.513	39.6941	Medium	Yes		27.3324						0.794071	28.1265	1	No	0	0	Yes	35	185.7	305.474	412.498	903.672
242	1409	396	14	Río Ameca	Ameca Ixtapa B	Nayarit, Jalisco	888.27	Ameca	6 de Junio de 2018	1640	6 de Junio de 2018	0.944		238.565	1862.24	102.144	0	0.944	103.088	20.514	0	0	0	0	2018.23	1640	378.227	5.10785	Low	Yes		275.701					153.249	3.15949	432.109	1	No	0	0	Yes	19	50.975	57.6787	335.561	444.215
243	1501	425	15	Costa de Jalisco	Río Tecolotán	Jalisco	446.575							149.483	0	0.215	122.207	0	122.422	122.306	0	0	0	0	149.367	0	149.367	81.9605	Very high	No									0	0	No	0	0	Yes	17	188.012	110.39	81.5213	379.923
244	1502	433	15	Costa de Jalisco	Río Ipala	Jalisco	378.21	Costa de Jalisco	6 de Junio de 2018	62.626				115.968	0	2.282	0	0	2.282	2.175	0	0	0	0	115.861	62.626	53.235	1.9696	Low	Yes						2.18119			2.18119	1	Yes	8.76864	1	Yes	5	55.4831	47.5949	34.8322	137.91
245	1503	434	15	Costa de Jalisco	Río María García	Jalisco	606.958							199.802	0	213.189	0.16	0	213.349	43.214	212.47	0	0	0	242.137	0	242.137	88.1109	Very high	Yes						1.51487			1.51487	1	Yes	6.8592	1	Yes	5	55.7536	32.4667	37.4061	125.626
246	1504	430	15	Costa de Jalisco	Río Tomatlán A	Jalisco	1145.65	Costa de Jalisco	6 de Junio de 2018	180.702				854.838	0	995.655	0	0	995.655	533.402	0	0	26.737	2.491	363.357	267.904	95.453	371.126	Very high	No									0	0	No	0	0	Yes	21	134.344	289.075	150.767	574.186
247	1505	440	15	Costa de Jalisco	Río Tomatlán B	Jalisco	1216.44	Costa de Jalisco	6 de Junio de 2018	496.904				316.281	363.357	155.942	0	0	155.942	493.98	0	212.47	0	0	805.206	496.9	308.306	45.7535	High	Yes						2.20991			2.20991	1	Yes	15.2796	1	Yes	9	140.78	40.5469	76.6245	257.951
248	1506	439	15	Costa de Jalisco	Río San Nicolás A	Jalisco	2329.49	Costa de Jalisco	6 de Junio de 2018	316.67				442.189	0	14.191	0.623	0	14.814	4.4	0	0	0	0	431.775	316.67	115.105	3.43095	Low	Yes		4.98231				0.243913	0.447742		5.67396	1	Yes	10.8705	1	Yes	59	198.902	965.155	315.939	1480
249	1507	475	15	Costa de Jalisco	Río San Nicolás B	Jalisco	406.869	Costa de Jalisco	6 de Junio de 2018	39.05				40.795	0	1.637	0	0	1.637	0.989	0	0	0	0	40.147	39.05	1.097	4.07752	Low	Yes					83.4305	1.07571		4.53467	89.0409	1	Yes	83.4305	1	Yes	8	173.643	28.0905	24.0424	225.776
250	1508	464	15	Costa de Jalisco	Río Cuitzmala	Jalisco	1080.48	Costa de Jalisco	6 de Junio de 2018	153				207.486	0	6.281	0.229	0	6.51	1.482	0	0	0	0	202.458	153	49.458	3.21548	Low	Yes					47.2616	0.406136		0.674851	48.3426	1	Yes	47.2618	1	Yes	15	31.9933	89.5129	240.555	362.061
251	1509	463	15	Costa de Jalisco	Río Purificación	Jalisco, Colima	2251.52	Costa de Jalisco	6 de Junio de 2018	186.81				475.836	0	46.943	0.52	0	47.463	11.476	0	0	0	0	439.849	186.81	253.039	10.7907	Medium	Yes					186.655	0.356219			187.011	1	Yes	5.83152	1	Yes	28	164.72	202.154	337.153	704.028
252	1510	478	15	Costa de Jalisco	Río Marabasco A	Jalisco, Colima	2198.65	Costa de Jalisco	6 de Junio de 2018	269.792				499.924	0	72.643	0.033	0	72.676	16.954	0	0	0	0	444.202	269.792	174.41	16.361	Medium	Yes					466.846				466.846	1	Yes	1.29452	1	Yes	57	405.309	592.111	395.606	1393.03
253	1511	491	15	Costa de Jalisco	Río Marabasco B	Colima	887.023							210.439	0	12.476	0	0	12.476	5.363	0	0	88.604	0	114.722	0	114.722	88.1086	Very high	No									0	0	Yes	89.529	1	Yes	19	196.71	114.234	185.313	496.256
254	1601	428	16	Armería-Coahuayana	Tacotán	Jalisco	1161.91							156.48	0	126.776	0	0	126.776	0.344	0	0	4.054	0.494	25.5	21.161	4.339	3026.6	Very high	Yes	24.5478	7.30682							31.8546	1	No	0	0	Yes	26	81.1559	387.989	230.46	699.606
255	1602	462	16	Armería-Coahuayana	Corcovado	Jalisco	1599.65							242.578	25.5	272.661	0	0	272.661	387.536	0	0	9.386	7.196	366.371	254.823	111.548	259.299	Very high	Yes		3.0784							3.0784	1	No	0	0	Yes	36	102.105	553.243	242.165	897.513
256	1603	453	16	Armería-Coahuayana	Las Piedras	Jalisco	1730.3							155.979	0	109.733	0	0	109.733	2.746	0	0	5.839	-0.522	43.675	30.912	12.763	901.434	Very high	Yes	94.2985								94.2985	1	No	0	0	Yes	38	140.13	355.545	436.777	932.451
257	1604	456	16	Armería-Coahuayana	El Rosario	Jalisco	1687.84							214.465	43.675	14.418	0	0	14.418	100.291	0	0	0	0	344.014	239.273	104.741	13.7654	Medium	Yes				2.91481					2.91481	1	No	0	0	Yes	32	111.755	187.361	496.44	795.556
258	1605	466	16	Armería-Coahuayana	Canoas	Jalisco	1294.77							233.8	710.384	207.05	83.92	0	290.97	30.507	0	0	0	0	683.722	386.96	296.762	98.0483	Very high	Yes					507.098				507.098	1	No	0	0	Yes	14	117.237	49.0369	169.57	335.845
259	1606	480	16	Armería-Coahuayana	Armería	Colima, Jalisco	2289.94							756.654	683.722	873.128	5.38	0	878.508	111.866	0	0	0	0	673.734	0	673.734	130.394	Very high	Yes	50.3718	1.65075		26.3658	227.412		40.6688		346.469	1	No	0	0	Yes	27	171.037	57.1673	433.835	662.04
260	1607	458	16	Armería-Coahuayana	Quito	Jalisco	2386.56							467.938	0	60.508	1.002	0	61.511	10.079	0	0	0	0	416.507	172.304	244.203	25.1885	Medium	Yes				0.091777			2.87735		2.96913	1	No	0	0	Yes	58	901.235	265.074	273.641	1439.95
261	1608	507	16	Armería-Coahuayana	Barreras	Michoacán de Ocampo, Colima, Jalisco	1878.53							337.664	0	12.721	0.025	0	12.746	2.96	0	0	9.407	0.317	318.154	131.616	186.538	12.0458	Medium	Yes							22.5075		22.5075	1	No	0	0	Yes	46	472.982	261.23	339.541	1073.75
262	1609	482	16	Armería-Coahuayana	Coahuayana 1	Michoacán de Ocampo, Colima	2504.1							648.374	734.661	126.022	0.099	0	126.121	18.118	0	0	0	0	1275.03	453.518	821.513	15.3523	Medium	Yes				32.6163			27.7106		60.3269	1	No	0	0	Yes	40	685.184	116.683	226.552	1028.42
263	1610	744	16	Armería-Coahuayana	Coahuayana 2	Michoacán de Ocampo, Colima, Jalisco	1016.6							217.368	1275.03	539.939	0.039	0	539.977	61.318	0	0	12.628	0.039	1001.07	0	1001.07	55.2052	High	Yes							41.8339		41.8339	1	Yes	1.46282	1	Yes	11	38.7014	49.7954	166.08	254.576
264	1701	518	17	Costa de Michoacán	Ríos Aquila-Ostuta	Michoacán de Ocampo	1317.44							191.556	0	6.591	0.048	0	6.64	1.813	0	0	0	0	186.729	0	186.729	3.55596	Low	Yes						1.15042	1.08718		2.2376	1	Yes	1.03933	1	Yes	15	16.022	172.667	174.37	363.058
265	1702	509	17	Costa de Michoacán	Río Coalcomán	Michoacán de Ocampo, Jalisco	1990.18							518.218	0	12.07	0.208	0	12.278	3.7	0	0	0	0	509.64	0	509.64	2.40915	Low	Yes							0.385746		0.385746	1	No	0	0	Yes	24	50.0019	188.397	361.326	599.725
266	1703	534	17	Costa de Michoacán	Ríos Marmeyera-Tupitina	Michoacán de Ocampo	1045.24							182.645	0	1.662	0	0	1.662	0.536	0	0	0	0	181.519	0	181.519	0.915607	Low	Yes						0.734486			0.734486	1	Yes	0.0026154	1	Yes	24	25.001	415.515	183.357	623.872
267	1704	515	17	Costa de Michoacán	Río Nexpa	Michoacán de Ocampo	2252.21							362.161	0	7.558	0	0	7.558	2.654	0	0	0	0	357.258	0	357.258	2.11556	Low	No									0	0	No	0	0	Yes	46	136.128	381.524	544.772	1062.42
268	1705	529	17	Costa de Michoacán	Río Chula	Michoacán de Ocampo	1353.93							191.022	0	0.769	0.003	0	0.772	0.431	0	0	0	0	190.68	0	190.68	0.404867	Low	No									0	0	No	0	0	Yes	23	140.394	282.625	155.992	579.011
269	1706	537	17	Costa de Michoacán	Río Acapilcan	Michoacán de Ocampo	1073.3							167.584	0	1.287	0	0	1.287	0.756	0	0	0	0	167.053	0	167.053	0.770414	Low	Yes							11.3267		11.3267	1	Yes	10.3024	1	Yes	9	40.0928	48.9382	127.307	216.339
270	1801	472	18	Balsas	Río Alto Atoyac	Tlaxcala, Puebla, Estado de México	4001.66				24 de junio de 2011			551.059	0	337.45	0.047	0.708	338.205	231.526	0	348.731	54.055	3.318	38.276	44.825	-6.549	0	Very high	Yes				410.738			135.542	20.2602	566.54	1	Yes	174.118	1	Yes	34	175.569	30.0972	680.43	886.096
271	1802	492	18	Balsas	Río Amacuzac	Estado de México, Morelos, Guerrero, Puebla, Ciudad de México	8862.95				24 de junio de 2011			2305.19	0	1112.89	66.493	45.976	1225.36	341.085	0	6	13.682	-0.036	1401.27	1641.04	-239.771	0	Very high	Yes	522.392	0.713066		327.137	516.217		1026.91	4.6658	2398.04	1	Yes	2.76153	1	Yes	111	474.939	573.848	1693.52	2742.31
272	1803	554	18	Balsas	Río Tlapaneco	Guerrero, Puebla, Oaxaca	4975.69				24 de junio de 2011			1053.31	0	33.349	0	4.198	37.547	17.608	0	0	0	0	1033.37	1210.19	-176.82	0	Very high	Yes								122.74	122.74	1	No	0	0	Yes	46	25.055	231.348	899.745	1156.15
273	1804	494	18	Balsas	Río Nexapa	Puebla, Estado de México, Morelos	4219.52				24 de junio de 2011			342.518	0	593.925	0	1.658	595.583	182.778	97.864	0	2.396	0	25.181	29.49	-4.309	0	Very high	Yes				85.7552	69.1717		268.953		423.88	1	Yes	8.12148	1	Yes	41	132.507	249.496	628.723	1010.73
274	1805	525	18	Balsas	Río Mixteco	Puebla, Oaxaca	11082.7				24 de junio de 2011			866.167	0	102.323	0.003	7.923	110.248	50.728	0	0	4.167	0	802.48	939.792	-137.313	0	Very high	Yes	39.1184				222.149			45.7606	307.028	1	No	0	0	Yes	116	447.625	1044.28	1470	2961.91
275	1806	490	18	Balsas	Río Bajo Atoyac	Puebla, Guerrero, Tlaxcala	11970.1				24 de junio de 2011			775.087	3300.57	262.914	0	7.479	270.393	65.115	176.965	0	0	0	4047.34	4786.15	-738.81	0	Very high	Yes				96.9007	90.0942		315.269	33.2477	535.511	1	Yes	63.102	1	Yes	81	139.604	570.612	1252.59	1962.8
276	1807	469	18	Balsas	Río Cutzamala	Estado de México, Michoacán de Ocampo, Guerrero	10643				24 de junio de 2011			2595.35	0	3846.19	126.393	8.972	3981.56	2351.03	0	484.551	61.178	94.242	324.853	384.152	-59.299	0	Very high	Yes	144.194	1394.11		203.707	459.152		1258.15		3459.31	1	No	0	0	Yes	185	242.505	1729.35	2664.17	4636.03
277	1808	508	18	Balsas	Río Medio Balsas	Guerrero, Estado de México, Michoacán de Ocampo	21270.5				24 de junio de 2011			3253.33	4372.2	4814.62	10.776	20.154	4845.55	5668.6	6	0	111.388	22.283	8320.91	10748.7	-2427.83	0	Very high	Yes					3.49375		1301.38	45.1865	1350.06	1	No	0	0	Yes	264	653.352	2318.58	3683.87	6655.81
278	1809	479	18	Balsas	Río Cupatitzio	Michoacán de Ocampo	2676.53				24 de junio de 2011			1176.6	0	1934.45	0	14.186	1948.64	1223.02	0	0	0	0	450.982	582.567	-131.585	0	Very high	Yes				4.54859			241.018		245.567	1	No	0	0	Yes	57	649.344	285.763	511.532	1446.64
279	1810	483	18	Balsas	Río Tacámbaro	Michoacán de Ocampo	5493.9				24 de junio de 2011			967.942	0	228.652	0.231	0	228.883	87.297	0	0	0	0	826.357	1067.47	-241.11	0	Very high	Yes							29.5501		29.5501	1	No	0	0	Yes	96	278.679	1113.8	940.465	2332.94
280	1811	741	18	Balsas	Río Tepalcatepec	Michoacán de Ocampo, Jalisco	11609.7				24 de junio de 2011			1957.21	0	1723.17	26.811	3.351	1753.34	870.369	0	0	55.019	12.078	1007.15	1301.01	-293.86	0	Very high	Yes	232.399						1.53563		233.935	1	No	0	0	Yes	185	1812.95	1090.79	1755.85	4659.59
281	1812	496	18	Balsas	Río Bajo Balsas	Michoacán de Ocampo, Guerrero	13972.8				24 de junio de 2011			2296.38	10605.4	16070.6	0.048	0.305	16070.9	14396.8	0	0	565.165	30.069	10632.4	0	10632.4	156.749	Very high	Yes					2637.04		59.97		2697.01	1	Yes	0.9002	1	Yes	149	201.837	1333.46	2162.79	3698.09
282	1813	743	18	Balsas	Río Paracho-Nahuatzen	Michoacán de Ocampo	832.516							89.4	0	0.01	0	0	0.01	0.002	0	0	0	0	89.392	89.608	-0.217	0	Very high	Yes							0.235983		0.235983	1	No	0	0	Yes	2	32.4346	25.0009	3.5445	60.98
283	1814	486	18	Balsas	Río Zirahuén	Michoacán de Ocampo	269.482							51.216	0	3.295	0	0	3.295	1.999	0	0	0	0	49.92	52.998	-3.078	0	Very high	Yes							7.27157		7.27157	1	No	0	0	Yes	10	164.331	8.64915	73.3179	246.298
284	1815	471	18	Balsas	Río Libres Oriental	Puebla, Tlaxcala, Veracruz-Llave	4726.88				24 de junio de 2011			294.067	0	3.983	8.942	2.58	15.505	4.637	0	0	0	0	283.198	292.436	-9.238	0	Very high	Yes				228.327			27.8384	2.9884	259.154	1	No	0	0	Yes	35	318.173	175.818	373.763	867.754
285	1901	550	19	Costa Grande de Guerrero	Río Cofradía	Guerrero	587.566							101.117	0	0.611	0	0	0.611	0.248	0	0	0	0	100.754	0	100.754	0.606428	Low	No									0	0	No	0	0	Yes	0	0	0	10.391	10.391
286	1902	548	19	Costa Grande de Guerrero	Río La Unión 1	Guerrero	1108.42							240.765	0	5.098	0	0	5.098	1.069	0	0	0	0	236.737	1.171	235.566	2.16415	Low	No									0	0	No	0	0	Yes	14	24.2325	62.704	319.938	406.874
287	1903	556	19	Costa Grande de Guerrero	Río La Unión 2	Guerrero	110.292							17.1	236.737	1.257	0	0	1.257	0.262	0	0	0	0	252.842	0	252.842	0.497148	Low	No									0	0	No	0	0	Yes	1	0	0	14.4899	14.4899
288	1904	565	19	Costa Grande de Guerrero	Río Pontla	Guerrero	591.306							92.708	0	0.565	0	0	0.565	0.162	0	0	0	0	92.306	0	92.306	0.612095	Low	No									0	0	No	0	0	Yes	5	20.6849	24.9845	79.206	124.875
289	1905	557	19	Costa Grande de Guerrero	Río Ixtapa 1	Guerrero	837.819	Costa Grande de Guerrero	6 de Junio de 2018	94.389	6 de Junio de 2018	0.271		269.387	0	0.347	0	0.253	0.6	0.13	0	0	0	0	268.917	96.612	172.305	0.224977	Low	No									0	0	No	0	0	Yes	6	0	25.6731	137.531	163.204
290	1906	574	19	Costa Grande de Guerrero	Río Ixtapa 2	Guerrero	28.6641	Costa Grande de Guerrero	6 de Junio de 2018	95.954	6 de Junio de 2018	2.469		5.04	268.917	0	0	2.469	2.469	0	0	0	0	0	271.488	95.954	175.534	0.909432	Low	No									0	0	No	0	0	Yes	1	0.219179	0	11.9889	12.2081
291	1907	577	19	Costa Grande de Guerrero	Río Zihuatanejo	Guerrero	308.106							46	0	0.025	0	0	0.025	0.012	0	0	0	0	45.987	0	45.987	0.0543632	Low	Yes							0.874878		0.874878	1	No	0	0	Yes	4	21.0346	0	86.8661	107.901
292	1908	566	19	Costa Grande de Guerrero	Río San Jeronimito	Guerrero	750.057	Costa Grande de Guerrero	6 de Junio de 2018	136.6	6 de Junio de 2018	0.81		343.489	0	3.565	0	0.77	4.335	0.789	0	0	0	0	339.944	146.013	193.93	1.31153	Low	No									0	0	No	0	0	Yes	11	0	29.5875	234.469	264.057
293	1909	570	19	Costa Grande de Guerrero	Río Petatlán 1	Guerrero	454.997	Costa Grande de Guerrero	6 de Junio de 2018	146.504	6 de Junio de 2018	0.105		351.405	0	0.21	0	0.105	0.315	0.079	0	0	0	0	351.169	150.835	200.334	0.0908205	Low	No									0	0	No	0	0	Yes	7	0	25.001	156.694	181.695
294	1910	585	19	Costa Grande de Guerrero	Río Petatlán 2	Guerrero	119.545	Costa Grande de Guerrero	6 de Junio de 2018	289.885	6 de Junio de 2018	2.733		21.775	691.112	14.855	0	2.733	17.588	2.975	0	0	0	0	698.274	289.89	408.384	2.5188	Low	No									0	0	No	0	0	Yes	2	0.1919	0.724759	54.4466	55.3632
295	1911	591	19	Costa Grande de Guerrero	Río Tule	Guerrero	324.923							74.448	0	1.437	0	0	1.437	0.316	0	0	0	0	73.327	0	73.327	1.95971	Low	No									0	0	No	0	0	Yes	8	8.75561	76.833	103.533	189.122
296	1912	573	19	Costa Grande de Guerrero	Río Coyuquilla 1	Guerrero	530.499	Costa Grande de Guerrero	6 de Junio de 2018	179.687	6 de Junio de 2018	0.002		394.022	0	9.434	0	0	9.434	1.957	0	0	0	0	386.545	193.439	193.106	2.53063	Low	No									0	0	No	0	0	Yes	6	0	41.8715	99.0968	140.968
297	1913	599	19	Costa Grande de Guerrero	Río Coyuquilla 2	Guerrero	62.8533	Costa Grande de Guerrero	6 de Junio de 2018	186.466	6 de Junio de 2018	0.21		15.157	386.545	15.963	0	0.21	16.173	3.227	0	0	0	0	388.756	186.466	202.29	4.16019	Low	No									0	0	No	0	0	Yes	1	0	11.2195	32.7657	43.9852
298	1914	601	19	Costa Grande de Guerrero	Río Porvenir	Guerrero	189.613							48.426	0	0.048	0	0	0.048	0.015	0	0	0	0	48.394	0	48.394	0.0991858	Low	Yes						0.991681			0.991681	1	No	0	0	Yes	2	0	19.2629	24.4881	43.751
299	1915	576	19	Costa Grande de Guerrero	Río San Luis 1	Guerrero	858.351	Costa Grande de Guerrero	6 de Junio de 2018	138.199	6 de Junio de 2018	0.213		423.927	0	23.874	0	0.206	24.08	4.855	0	0	0	0	404.702	140.196	264.507	5.97955	Low	No									0	0	No	0	0	Yes	16	0	163.243	241.227	404.47
300	1916	607	19	Costa Grande de Guerrero	Río San Luis 2	Guerrero	20.0709	Costa Grande de Guerrero	6 de Junio de 2018	139.565	6 de Junio de 2018	0.824		3.263	404.702	1.009	0	0.824	1.833	0.206	0	0	0	0	406.339	139.565	266.774	0.451101	Low	No									0	0	No	0	0	Yes	0	0	4.89325	4.22481	9.11807
301	1917	603	19	Costa Grande de Guerrero	Laguna de Nuxco	Guerrero	338.335							66.82	0	0.044	0	0	0.044	0.031	0	0	0	0	66.807	0	66.807	0.0658614	Low	No									0	0	No	0	0	Yes	6	0	92.9433	47.9248	140.868
302	1918	582	19	Costa Grande de Guerrero	Río Tecpan 1	Guerrero	1190.52	Costa Grande de Guerrero	6 de Junio de 2018	620.381	6 de Junio de 2018	0.716		1118.63	0	0.436	0	0.108	0.544	0.166	0	0	0	0	1118.25	615.198	503.056	0.0484228	Low	Yes								1.14654	1.14654	1	No	0	0	Yes	26	16.8872	352.638	277.862	647.387
303	1919	605	19	Costa Grande de Guerrero	Río Tecpan 2	Guerrero	208.917	Costa Grande de Guerrero	6 de Junio de 2018	613	6 de Junio de 2018	0.824		55.098	1118.25	34.509	0	1.815	36.324	6.932	0	0	0	0	1143.96	613	530.96	3.17529	Low	No									0	0	No	0	0	Yes	3	24.6913	57.6779	16.5976	98.9667
304	1920	616	19	Costa Grande de Guerrero	Río El Tular	Guerrero	177.542							57.749	0	0.013	0	0	0.013	0.01	0	0	0	0	57.746	0	57.746	0.0225124	Low	No									0	0	No	0	0	Yes	2	5.9577	14.9163	16.0301	36.9041
305	1921	589	19	Costa Grande de Guerrero	Río Atoyac 1	Guerrero	822.268	Costa Grande de Guerrero	6 de Junio de 2018	252.089	6 de Junio de 2018	0.716		677.669	0	32.857	0	0.647	33.503	8.126	0	0	0	0	652.292	254.49	397.802	5.15517	Low	Yes								7.3478	7.3478	1	No	0	0	Yes	18	37.0695	296.717	90.3602	424.147
306	1922	618	19	Costa Grande de Guerrero	Río Atoyac 2	Guerrero	56.855	Costa Grande de Guerrero	6 de Junio de 2018	259.258	6 de Junio de 2018	0.824		14.333	652.292	0	0	0.824	0.824	0	0	0	0	0	665.801	259.258	406.543	0.123761	Low	No									0	0	No	0	0	Yes	1	0	0	27.8594	27.8594
307	1923	613	19	Costa Grande de Guerrero	Arroyo Cacaluta	Guerrero	525.038							122.63	0	0.154	0	0	0.154	0.115	0	0	0	0	122.592	0	122.592	0.12562	Low	No									0	0	No	0	0	Yes	13	88.7774	130.093	58.4218	277.292
308	1924	596	19	Costa Grande de Guerrero	Río Coyuca 1	Guerrero	1284.68	Costa Grande de Guerrero	6 de Junio de 2018	151.998	6 de Junio de 2018	5.8		356.484	0	11.492	0	0.502	11.993	3.919	0	0	0	0	348.41	151.651	196.759	3.43878	Low	No									0	0	No	0	0	Yes	35	277.691	364.343	233.995	876.029
309	1925	631	19	Costa Grande de Guerrero	Río Coyuca 2	Guerrero	29.1456	Costa Grande de Guerrero	6 de Junio de 2018	154.242	6 de Junio de 2018	0.388		6.849	348.41	0.003	0	0.388	0.391	0.002	0	0	0	0	354.87	154.242	200.628	0.110181	Low	No									0	0	No	0	0	Yes	0	28.0745	0	1.07108	29.1456
310	1926	624	19	Costa Grande de Guerrero	Laguna de Coyuca	Guerrero	433.265							101.297	0	14.167	0	0	14.167	2.923	0	0	0	0	90.053	0	90.053	15.7318	Medium	Yes				33.4598			0.305809		33.7656	1	No	0	0	Yes	12	135.521	70.5282	63.0662	269.115
311	1927	617	19	Costa Grande de Guerrero	Río La Sabana 1	Guerrero	319.387	Costa Grande de Guerrero	6 de Junio de 2018	38.956	6 de Junio de 2018	1.523		92.482	0	1.873	0	1.523	3.396	1.178	0	0	0	0	90.265	42.373	47.892	3.91028	Low	Yes							0.313307		0.313307	1	No	0	0	Yes	8	24.9869	21.0638	134.337	180.388
312	1928	637	19	Costa Grande de Guerrero	Río La Sabana 2	Guerrero	441.855	Costa Grande de Guerrero	6 de Junio de 2018	83.15	6 de Junio de 2018	8.32		105.379	90.265	0.571	0	8.32	8.891	0.426	0	0	0	0	187.179	83.15	104.029	4.75	Low	Yes				2.81315					2.81315	1	No	0	0	Yes	6	110.735	0	32.2788	143.013
313	2001	586	20	Costa Chica de Guerrero	Río Papagayo 1	Guerrero	1958.17	Costa Chica de Guerrero	6 de Junio de 2018	280.248	6 de Junio de 2018	1.372	3 de Mayo 2022	1497.87	0	3.604	0	1.372	4.976	1.044	0	0	0	0	1493.94	1460.72	33.216	14.9807	Medium	Yes							25.9973	8.24369	34.241	1	No	0	0	Yes	49	328.272	538.825	380.81	1247.91
314	2002	584	20	Costa Chica de Guerrero	Río Petaquillas	Guerrero	882.27	Costa Chica de Guerrero	6 de Junio de 2018	12.633	6 de Junio de 2018	31.376	3 de Mayo 2022	372.071	0	255.233	0	31.359	286.593	8.391	0	0	0	0	93.869	91.815	2.054	13952.9	Very high	No									0	0	No	0	0	Yes	6	68.8796	0	79.8316	148.711
315	2003	730	20	Costa Chica de Guerrero	Río Omitlán	Guerrero	3374.48	Costa Chica de Guerrero	6 de Junio de 2018	280.903	6 de Junio de 2018	10.982	3 de Mayo 2022	1337.94	93.869	15.494	0	10.897	26.391	240.117	0	0	0	0	1645.53	1608.95	36.586	72.1341	High	Yes								211.149	211.149	1	No	0	0	Yes	46	113.758	432.16	628.38	1174.3
316	2004	602	20	Costa Chica de Guerrero	Río Papagayo 2	Guerrero	415.634	Costa Chica de Guerrero	6 de Junio de 2018	710.208	6 de Junio de 2018	3.789	3 de Mayo 2022	664.593	3139.47	1750.12	0	3.789	1753.91	0.835	0	0	25	0	2026	1941.4	84.597	2102.8	Very high	Yes								0.879529	0.879529	1	No	0	0	Yes	4	38.6963	23.6583	35.2713	97.6259
317	2005	622	20	Costa Chica de Guerrero	Río Papagayo 3	Guerrero	618.269	Costa Chica de Guerrero	6 de Junio de 2018	902.804	6 de Junio de 2018	0.695	3 de Mayo 2022	707.964	2026	4040.21	0	0.62	4040.83	1746.74	0	0	0	0	439.871	252.776	187.095	2159.77	Very high	No									0	0	No	0	0	Yes	5	0	1.34419	126.667	128.011
318	2006	639	20	Costa Chica de Guerrero	Río Papagayo 4	Guerrero	306.14	Costa Chica de Guerrero	6 de Junio de 2018	858.243			3 de Mayo 2022	69.999	439.871	4106.04	0	0	4106.04	8128.78	0	0	0	0	4532.6	858.243	3674.36	111.748	Very high	No									0	0	No	0	0	Yes	0	10.5574	0	0	10.5574
319	2007	630	20	Costa Chica de Guerrero	Río Cortés	Guerrero	1104.77							267.214	0	3.179	0	0	3.179	0.844	0	0	0	0	264.879	0	264.879	1.20017	Low	No									0	0	No	0	0	Yes	14	58.3127	81.0328	205.237	344.582
320	2008	620	20	Costa Chica de Guerrero	Río Nexpa 1	Guerrero	1122.3	Costa Chica de Guerrero	6 de Junio de 2018	176.613	6 de Junio de 2018	9.624	3 de Mayo 2022	565.061	0	317.762	0	9.624	327.386	273.314	0	0	14.1	0	496.889	228.844	268.045	127.399	Very high	No									0	0	No	0	0	Yes	14	0	168.82	171.272	340.093
321	2009	655	20	Costa Chica de Guerrero	Río Nexpa 2	Guerrero	191.524	Costa Chica de Guerrero	6 de Junio de 2018	255.317	6 de Junio de 2018	1.462	3 de Mayo 2022	60.895	496.889	0.169	0	1.462	1.631	0.127	0	0	0	0	556.28	255.317	300.963	0.541927	Low	No									0	0	No	0	0	Yes	5	15.8016	20.7277	63.4258	99.9551
322	2010	632	20	Costa Chica de Guerrero	Río Copala	Guerrero	901.386							397.153	0	27.977	0	0	27.977	5.687	0	0	0	0	374.863	0	374.863	7.46326	Low	No									0	0	No	0	0	Yes	10	103.206	58.3391	121.026	282.571
323	2011	625	20	Costa Chica de Guerrero	Río Marquelia 1	Guerrero	1013.58							802.437	0	10.116	0	0	10.116	2.247	0	0	0	0	794.568	0.162	794.407	1.2734	Low	Yes								77.8222	77.8222	1	No	0	0	Yes	17	35.2778	115.042	256.203	406.524
324	2012	660	20	Costa Chica de Guerrero	Río Marquelia 2	Guerrero	116.964							29.083	794.568	0.168	0	0	0.168	0.034	0	0	0	0	823.518	0	823.518	0.0204003	Low	No									0	0	No	0	0	Yes	0	0.616763	0	3.43764	4.05441
325	2013	606	20	Costa Chica de Guerrero	Río Quetzala	Guerrero	1970.5	Costa Chica de Guerrero	6 de Junio de 2018	1515.39	6 de Junio de 2018	4.327	3 de Mayo 2022	3100.41	0	5.852	0	4.2	10.052	2.607	0	0	0	0	3092.97	1669.44	1423.52	0.706136	Low	Yes								71.2317	71.2317	1	No	0	0	Yes	38	207.852	370.548	346.642	925.042
326	2014	746	20	Costa Chica de Guerrero	Río Infiernillo	Guerrero, Oaxaca	622.357	Costa Chica de Guerrero	6 de Junio de 2018	124.95	6 de Junio de 2018	1.374	3 de Mayo 2022	306.465	0	2.29	0	1.374	3.664	0.665	0	0	0	0	303.466	165.501	137.965	2.65575	Low	No									0	0	No	0	0	Yes	17	25.001	190.418	209.758	425.177
327	2015	745	20	Costa Chica de Guerrero	Río Santa Catarina	Oaxaca, Guerrero	579.198	Costa Chica de Guerrero	6 de Junio de 2018	120.433	6 de Junio de 2018	0.249	3 de Mayo 2022	306.205	0	11.835	0	0.249	12.084	2.985	0	0	0	0	297.106	162.033	135.073	8.94627	Low	No									0	0	No	0	0	Yes	20	107.539	185.354	173.079	465.973
328	2016	629	20	Costa Chica de Guerrero	Río Ometepec 1	Guerrero, Oaxaca	1323.99	Costa Chica de Guerrero	6 de Junio de 2018	476.404	6 de Junio de 2018	5.344	3 de Mayo 2022	597.431	600.572	9.511	0	5.135	14.647	2.538	0	0	0	0	1185.89	640.093	545.802	2.68357	Low	Yes								1.28e-06	1.28e-06	1	No	0	0	Yes	37	213.476	373.186	348.296	934.958
998	2017	750	20	Costa Chica de Guerrero	Río Ometepec 2	Oaxaca, Guerrero	125.673	Costa Chica de Guerrero	6 de Junio de 2018	19.565			3 de Mayo 2022	43.291	0	0.016	0	0	0.016	0.012	0	0	0	0	43.287	23.364	19.923	0.0803092	Low	Yes								0.307553	0.307553	1	No	0	0	No					0
330	2018	753	20	Costa Chica de Guerrero	Río Ometepec 3	Guerrero, Oaxaca	70.1253	Costa Chica de Guerrero	6 de Junio de 2018	4.735			3 de Mayo 2022	16.717	0	0.15	0	0	0.15	0.03	0	0	0	0	16.597	8.958	7.639	1.96361	Low	No									0	0	No	0	0	Yes	2	12.2971	0	25.2718	37.5689
331	2019	659	20	Costa Chica de Guerrero	Río Cortijos 1	Oaxaca	556.874	Costa Chica de Guerrero	6 de Junio de 2018	62.367	6 de Junio de 2018	2.032	3 de Mayo 2022	132.877	0	5.571	0	1.901	7.472	1.528	0	0	0	0	126.933	71.153	55.78	13.3955	Medium	No									0	0	No	0	0	Yes	19	110.283	250.736	96.9562	457.975
332	2020	748	20	Costa Chica de Guerrero	Río Cortijos 2	Oaxaca, Guerrero	60.0634	Costa Chica de Guerrero	6 de Junio de 2018	14.269	6 de Junio de 2018	0.275	3 de Mayo 2022	28.207	0	0.26	0	0.275	0.535	0.086	0	0	0	0	27.758	15.56	12.198	4.38596	Low	Yes								0.0103309	0.0103309	1	No	0	0	Yes	1	0	0	18.9482	18.9482
333	2021	749	20	Costa Chica de Guerrero	Río Cortijos 3	Oaxaca, Guerrero	507.155	Costa Chica de Guerrero	6 de Junio de 2018	133.119	6 de Junio de 2018	0.885	3 de Mayo 2022	114.938	154.691	4.751	0	0.885	5.636	1.182	0	0	0	0	265.175	146.169	119.006	4.7359	Low	No									0	0	No	0	0	Yes	10	29.4197	58.1806	207.759	295.359
334	2022	751	20	Costa Chica de Guerrero	Río Cortijos 4	Guerrero, Oaxaca	75.3599	Costa Chica de Guerrero	6 de Junio de 2018	145.543	6 de Junio de 2018	0.079	3 de Mayo 2022	19.557	265.175	7.048	0	0.079	7.127	1.41	0	0	0	0	279.015	150.6	128.415	5.54997	Low	No									0	0	No	0	0	Yes	0	0	0	0.619465	0.619465
335	2023	747	20	Costa Chica de Guerrero	Río Ometepec 4	Guerrero, Oaxaca	1318	Costa Chica de Guerrero	6 de Junio de 2018	2723.65	6 de Junio de 2018	10.832	3 de Mayo 2022	448.959	4617.76	0.542	0	10.8	11.342	0.371	0	0	0	0	5055.75	2723.65	2332.1	0.486342	Low	Yes						0.160206		0.681361	0.841567	1	Yes	0.0496342	1	Yes	13	0	36.4401	294.342	330.782
336	2024	668	20	Costa Chica de Guerrero	Río La Arena 1	Oaxaca	857.765	Costa Chica de Guerrero	6 de Junio de 2018	94.513	6 de Junio de 2018	6.927	3 de Mayo 2022	245.831	0	4.205	1.038	6.927	12.17	2.122	0	0	0	0	235.783	101.121	134.662	9.03744	Low	No									0	0	No	0	0	Yes	10	12.3407	78.4332	172.036	262.81
337	2025	682	20	Costa Chica de Guerrero	Río La Arena 2	Oaxaca	483.579	Costa Chica de Guerrero	6 de Junio de 2018	33.184	6 de Junio de 2018	0.577	3 de Mayo 2022	138.806	235.783	1.234	0	0.577	1.811	0.373	0	0	0	0	373.151	159	214.151	0.845665	Low	No									0	0	No	0	0	Yes	9	68.7554	40.383	116.073	225.212
338	2026	754	20	Costa Chica de Guerrero	Laguna de Corralero	Guerrero, Oaxaca	885.46							173.369	0	0.492	0	0	0.492	0.103	0	0	0	0	172.98	0	172.98	0.284426	Low	No									0	0	Yes	0.144342	1	Yes	17	223.489	50.085	178.87	452.444
339	2027	752	20	Costa Chica de Guerrero	Río La Arena 3	Guerrero, Oaxaca	193.352	Costa Chica de Guerrero	6 de Junio de 2018	33.184	6 de Junio de 2018	0.577	3 de Mayo 2022	62.116	0	0	0	0.029	0.029	0	0	0	0	0	62.087	33.184	28.903	0.100336	Low	Yes						0.979921			0.979921	1	Yes	0.328542	1	Yes	2	38.4298	0	6.81146	45.2412
340	2028	609	20	Costa Chica de Guerrero	Río Atoyac-Salado	Oaxaca	1192.98	Costa Chica de Guerrero	6 de Junio de 2018	35.033	6 de Junio de 2018	41.213	3 de Mayo 2022	137.62	0	12.776	0.015	41.213	54.004	4.157	0	0	0	0	87.773	55.888	31.885	169.371	Very high	Yes			10.7745	24.3259			9.75526	72.3657	117.221	1	No	0	0	Yes	17	143.719	79.3166	220.835	443.871
341	2029	595	20	Costa Chica de Guerrero	Río Atoyac-Tlapacoyan	Oaxaca	2360.08	Costa Chica de Guerrero	6 de Junio de 2018	269.493	6 de Junio de 2018	18.346	3 de Mayo 2022	268.02	87.773	35.067	0.206	18.318	53.591	10.835	0	0	0	0	313.038	179.853	133.185	40.238	High	Yes				1.60504			14.707	32.4761	48.7882	1	No	0	0	Yes	32	267.433	211.567	288.64	767.641
342	2030	580	20	Costa Chica de Guerrero	Río Sordo-Yolotepec	Oaxaca, Guerrero	7817.52	Costa Chica de Guerrero	6 de Junio de 2018	1841.09	6 de Junio de 2018	11.347	3 de Mayo 2022	3325.36	0	71.642	1.326	11.318	84.286	20.317	0	0	0	0	3261.39	1873.8	1387.59	6.07429	Low	No									0	0	No	0	0	Yes	152	668.418	1673.8	1493.87	3836.08
343	2031	645	20	Costa Chica de Guerrero	Río Atoyac-Paso de la Reina	Oaxaca	5806.02	Costa Chica de Guerrero	6 de Junio de 2018	2211.75			3 de Mayo 2022	1811.01	3574.43	66.344	1.387	0	67.731	36.689	0	0	0	0	5354.39	3047.5	2306.89	2.93603	Low	No									0	0	No	0	0	Yes	103	361.566	781.461	1430.67	2573.7
344	2032	679	20	Costa Chica de Guerrero	Río Verde	Oaxaca	1133.94	Costa Chica de Guerrero	6 de Junio de 2018	3270	6 de Junio de 2018	3.64	3 de Mayo 2022	463.51	5354.39	30.207	0.006	3.64	33.853	7.279	0	11.6	0	0	5779.73	3270	2509.72	1.81107	Low	Yes				6.7984					6.7984	1	Yes	9.64125	1	Yes	9	64.609	22.334	175.079	262.022
345	2101	694	21	Costa de Oaxaca	Río San Francisco	Oaxaca	584.027							154.294	0	11.782	0.32	0	12.101	0.331	11.6	0	0	0	154.123	0	154.123	7.85152	Low	Yes				107.992		0.537909			108.53	1	Yes	108.233	1	Yes	9	120.389	16.4629	50.2665	187.118
346	2102	689	21	Costa de Oaxaca	Río Grande	Oaxaca	473.183							121.24	0	0.666	0.001	0	0.667	0.229	0	0	0	0	120.802	0	120.802	0.552143	Low	No									0	0	No	0	0	Yes	6	10.6576	69.4081	71.9961	152.062
347	2103	686	21	Costa de Oaxaca	Río Manialtepec	Oaxaca	918.924							211.338	0	3.547	0.013	0	3.56	1.515	0	0	0	0	209.294	0	209.294	1.70096	Low	Yes								1.09671	1.09671	1	No	0	0	Yes	17	180.49	133.239	96.4781	410.207
348	2104	685	21	Costa de Oaxaca	Río Colotepec 1	Oaxaca	1665.55							419.616	0	4.232	0.039	0	4.271	2.462	0	0	0	0	417.808	0.459	417.349	1.02336	Low	No									0	0	No	0	0	Yes	40	109.09	479.129	365.924	954.143
349	2105	708	21	Costa de Oaxaca	Río Colotepec 2	Oaxaca	384.336							44.384	417.808	0.508	0	0	0.508	0.14	0	0	0	0	461.823	0	461.823	0.109999	Low	Yes								5.89367	5.89367	1	No	0	0	Yes	7	11.9676	27.2517	82.6986	121.918
350	2106	703	21	Costa de Oaxaca	Río Cozoaltepec 1	Oaxaca	272.44							42.997	0	0.85	0	0	0.85	0.463	0	0	0	0	42.611	0.058	42.552	1.99756	Low	Yes								4.82399	4.82399	1	No	0	0	Yes	9	69.892	110.48	91.854	272.225
351	2107	711	21	Costa de Oaxaca	Río Cozoaltepec 2	Oaxaca	187.444							15.776	42.611	0.08	0	0	0.08	0.069	0	0	0	0	58.375	0	58.375	0.137045	Low	Yes						0.769978		0.654154	1.42413	1	No	0	0	Yes	5	6.12878	0.128505	106.085	112.343
352	2108	705	21	Costa de Oaxaca	Río Tonameca 1	Oaxaca	539.601							284.752	0	2.543	0.066	0	2.608	1.595	0	0	0	0	283.739	0.134	283.604	0.919592	Low	Yes								2.69961	2.69961	1	No	0	0	Yes	6	12.016	71.2481	64.3769	147.641
353	2109	712	21	Costa de Oaxaca	Río Tonameca 2	Oaxaca	275.668							46.336	283.739	0.157	0	0	0.157	0.084	0	0	0	0	330.003	0	330.003	0.0475753	Low	Yes						0.143849			0.143849	1	Yes	0.459033	1	Yes	5	13.8563	48.9502	45.1425	107.949
354	2110	683	21	Costa de Oaxaca	Río Copalita 1	Oaxaca	1335.59							570.274	0	3.613	0.002	0	3.615	2.099	0	0	0	0	568.759	0.912	567.847	0.636615	Low	Yes								0.328476	0.328476	1	Yes	0.743234	1	Yes	29	21.5443	445.343	280.68	747.568
355	2111	706	21	Costa de Oaxaca	Río Copalita 2	Oaxaca	193.862							63.874	568.759	1.015	0	0	1.015	0.707	0	0	0	0	632.325	0	632.325	0.160519	Low	No									0	0	Yes	5.65147	1	Yes	3	6.18343	22.0282	26.1482	54.3598
356	2112	707	21	Costa de Oaxaca	Río Coyula	Oaxaca	647.305							161.234	0	1.398	0	0	1.398	0.848	0	0	0	0	160.684	0	160.684	0.870031	Low	Yes				64.9604				0.733181	65.6936	1	Yes	411.327	1	Yes	12	62.3464	19.2715	189.584	271.202
357	2113	693	21	Costa de Oaxaca	Río Zimatán 1	Oaxaca	377.095							46.69	0	0.056	0	0	0.056	0.042	0	0	0	0	46.676	0.017	46.659	0.12002	Low	Yes								1.65261	1.65261	1	No	0	0	Yes	10	170.545	68.0159	0.93999	239.5
358	2114	698	21	Costa de Oaxaca	Río Zimatán 2	Oaxaca	280.595							40.682	46.676	0.031	0	0	0.031	0.013	0	0	0	0	87.339	0	87.339	0.0354939	Low	Yes								50.0204	50.0204	1	Yes	0.00294042	1	Yes	6	88.8442	87.1022	0	175.946
359	2115	695	21	Costa de Oaxaca	Río Ayuta 1	Oaxaca	205.362							25.54	0	0	0	0	0	0	0	0	0	0	25.54	0	25.54	0	Low	Yes								2.01946	2.01946	1	No	0	0	Yes	3	16.638	55.43	0	72.0681
360	2116	699	21	Costa de Oaxaca	Río Ayuta 2	Oaxaca	392.507							49.623	25.54	0	0	0	0	0	0	0	0	0	75.163	0	75.163	0	Low	Yes								90.3609	90.3609	1	Yes	0.0211593	1	Yes	4	0	26.8402	56.3427	83.1829
361	2117	688	21	Costa de Oaxaca	Río Astata 1	Oaxaca	165.982							28.655	0	0.987	0	0	0.987	0.61	0	0	0	0	28.278	0.091	28.187	3.50161	Low	No									0	0	No	0	0	Yes	1	0	0	18.4161	18.4161
362	2118	681	21	Costa de Oaxaca	Río Astata 2	Oaxaca	364.499							63.126	28.278	0.296	0	0	0.296	0.214	0	0	0	0	91.322	0	91.322	0.324128	Low	No									0	0	No	0	0	Yes	5	0	47.3167	83.2789	130.596
363	2119	678	21	Costa de Oaxaca	Río Mazatán	Oaxaca	953.218							148.106	0	0.03	0	0	0.03	0.022	0	0	0	0	148.097	0	148.097	0.020257	Low	Yes								7.48825	7.48825	1	No	0	0	Yes	8	17.3928	58.5276	106.574	182.494
364	2201	621	22	Tehuantepec	Río San Antonio	Oaxaca	4719.69							328.058	0	24.877	0.164	0	25.041	6.05	0	0	0	0	309.067	246.189	62.878	39.8247	Medium	Yes							41.2921	0.249494	41.5416	1	No	0	0	Yes	45	33.135	209.587	947.36	1190.08
365	2202	665	22	Tehuantepec	Río San Tequisistlán	Oaxaca	2261.66							320.71	0	4.755	0	0	4.755	1.161	0	0	0	0	317.116	252.601	64.516	7.37026	Low	No									0	0	No	0	0	Yes	40	375.304	216.303	444.547	1036.15
366	2203	626	22	Tehuantepec	Río Tehuantepec 1	Oaxaca	2567.92							664.706	626.183	683.35	0	0	683.35	1.342	0	0	75.021	-0.474	534.334	271.437	262.897	288.287	Very high	No									0	0	No	0	0	Yes	54	510.112	352.707	455.81	1318.63
367	2204	667	22	Tehuantepec	Río Tehuantepec 2	Oaxaca	769.175							96.89	534.334	32.902	0	0	32.902	694.968	0	640.791	0	0	652.499	0	652.499	103.248	Very high	Yes								2.91506	2.91506	1	No	0	0	Yes	6	103.882	0	51.1809	155.063
368	2205	635	22	Tehuantepec	Río Los Perros 1	Oaxaca	980.712							143.692	0	0.733	0	0	0.733	0.448	0	0	0	0	143.407	73.196	70.211	1.044	Low	Yes								247.36	247.36	1	No	0	0	Yes	9	44.2621	60.1407	110.203	214.606
369	2206	664	22	Tehuantepec	Río Los Perros 2	Oaxaca	1066.48							153.254	143.407	374.47	0	0	374.47	74.957	362.047	0	0	0	359.196	0	359.196	104.252	Very high	Yes							0.375733		0.375733	1	No	0	0	Yes	5	84.4624	0.312656	44.6991	129.474
370	2207	650	22	Tehuantepec	Río Estancado	Oaxaca	593.211							88.47	0	0.004	0	0	0.004	0.003	0	0	0	0	88.469	0	88.469	0.00452136	Low	Yes								32.7379	32.7379	1	No	0	0	Yes	5	24.031	38.0957	76.3116	138.438
371	2208	638	22	Tehuantepec	Río Espíritu Santo 1	Oaxaca	461.347							235.225	0	0.016	0.009	0	0.026	0.011	0	0	0	0	235.21	0.125	235.085	0.0110598	Low	No									0	0	No	0	0	Yes	14	116.398	75.182	131.873	323.453
372	2209	653	22	Tehuantepec	Río Espíritu Santo 2	Oaxaca	169.733							28.63	235.21	0.14	0	0	0.14	0.094	0	0	0	0	263.794	0	263.794	0.0530717	Low	No									0	0	No	0	0	Yes	2	0	2.4941	49.3259	51.82
373	2210	651	22	Tehuantepec	Río Cazadero	Oaxaca	599.703							121.638	0	0	0	0	0	0	0	0	0	0	121.638	0	121.638	0	Low	No									0	0	No	0	0	Yes	8	6.99378	36.4814	161.733	205.208
374	2211	649	22	Tehuantepec	Río Niltepec 1	Oaxaca	95.1667							29.723	0	0.026	0	0	0.026	0.02	0	0	0	0	29.716	0	29.716	0.087495	Low	No									0	0	No	0	0	Yes	1	0	0.0179693	21.7901	21.8081
375	2212	658	22	Tehuantepec	Río Niltepec 2	Oaxaca	270.397							77.614	29.716	0	0	0	0	0	0	0	0	0	107.33	0	107.33	0	Low	No									0	0	No	0	0	Yes	0	5.48241	0	19.6674	25.1498
376	2213	640	22	Tehuantepec	Río Ostuta 1	Oaxaca	482.821							464.94	0	0.034	0	0	0.034	0.026	0	0	0	0	464.931	0.566	464.365	0.00732183	Low	No									0	0	No	0	0	Yes	10	6.70602	121.306	119.735	247.747
377	2214	644	22	Tehuantepec	Río Zanatepec	Oaxaca	274.198							99.04	0	0.108	0	0	0.108	0.022	0	0	0	0	98.954	0.121	98.833	0.109275	Low	Yes								71.2079	71.2079	1	No	0	0	Yes	6	18.2314	84.8646	44.8262	147.922
378	2215	657	22	Tehuantepec	Río Ostuta 2	Oaxaca	800.231							246.648	563.885	0.949	0.039	0	0.988	0.5	0	0	0	0	810.045	0	810.045	0.121969	Low	Yes								2.73675	2.73675	1	No	0	0	Yes	14	96.9763	45.3683	186.764	329.109
379	2301	669	23	Costa de Chiapas	Laguna Mar Muerto A	Oaxaca, Chiapas	641.996							200.694	0	16.998	0	0	16.998	16.536	0	0	0	0	200.232	0	200.232	8.48915	Low	Yes								4.52687	4.52687	1	Yes	3.9421	1	Yes	11	136.257	64.7354	88.6992	289.692
380	2302	661	23	Costa de Chiapas	Tapanatepec	Oaxaca, Chiapas	323.453							131.03	0	2.061	0.253	0	2.314	0.685	0	0	0	0	129.401	0	129.401	1.78824	Low	Yes					11.0815			13.5858	24.6673	1	No	0	0	Yes	9	37.2552	84.8479	56.1469	178.25
381	2303	670	23	Costa de Chiapas	Laguna Mar Muerto B	Chiapas, Oaxaca	324.795							141.461	0	0.317	0	0	0.317	0.07	0	0	0	0	141.215	0	141.215	0.22448	Low	No									0	0	Yes	20.497	1	Yes	1	12.997	5.68951	0	18.6866
382	2304	666	23	Costa de Chiapas	Las Arenas	Chiapas, Oaxaca	387.739							118.087	0	0.529	0	0	0.529	0.182	0	0	0	0	117.74	0	117.74	0.449295	Low	Yes					188.816				188.816	1	Yes	5.91861	1	Yes	0	2.20292	0	26.0738	28.2767
383	2305	671	23	Costa de Chiapas	La Punta	Chiapas	229.365							80.967	0	1.766	0	0	1.766	1.273	0	0	0	0	80.474	0	80.474	2.1945	Low	Yes					164.287				164.287	1	Yes	1.51506	1	Yes	5	19.6132	46.7302	58.059	124.402
384	2306	675	23	Costa de Chiapas	Laguna Mar Muerto C	Chiapas	518.479							221.659	0	0.392	0	0	0.392	0.156	0	0	0	0	221.423	0	221.423	0.177037	Low	Yes					127.995				127.995	1	Yes	27.3391	1	Yes	8	36.5321	28.2731	141.75	206.555
385	2307	677	23	Costa de Chiapas	Sanatenco	Chiapas	294.217							167.035	0	9.75	0	0	9.75	6.921	0	0	0	0	164.205	0	164.205	5.9377	Low	Yes		0.205823			143.208	1.70183			145.115	1	Yes	52.0572	1	Yes	7	75.4536	6.07475	96.5459	178.074
386	2308	684	23	Costa de Chiapas	Laguna de La Joya	Chiapas	671.774							369.117	0	0.246	0	0	0.246	0.126	0	0	0	0	368.998	0	368.998	0.066667	Low	Yes		1.06044			69.3856	0.407727			70.8537	1	Yes	278.806	1	Yes	18	90.811	164.513	150.464	405.788
387	2309	696	23	Costa de Chiapas	Jesús	Chiapas	357.787							292.878	0	0.113	0	0	0.113	0.073	0	0	0	0	292.838	0	292.838	0.0385879	Low	Yes		0.109939							0.109939	1	Yes	43.107	1	Yes	8	81.3674	48.65	71.0833	201.101
388	2310	700	23	Costa de Chiapas	El Porvenir	Chiapas	457.048							336.672	0	1.557	0.015	0	1.571	0.667	0	0	0	0	335.767	0	335.767	0.467884	Low	Yes		0.535721							0.535721	1	No	0	0	Yes	10	42.7341	23.1432	194.356	260.234
389	2311	702	23	Costa de Chiapas	San Diego	Chiapas	225.957							163.36	0	0.361	0	0	0.361	0.093	0	0	0	0	163.092	0	163.092	0.221347	Low	Yes		0.204707			5.40582				5.61053	1	Yes	4.41557	1	Yes	5	13.2639	62.5155	47.8792	123.659
390	2312	701	23	Costa de Chiapas	Pijijiapan	Chiapas	352.813							450.398	0	0.464	0	0	0.464	0.348	0	0	0	0	450.282	0	450.282	0.103047	Low	Yes		0.906252			81.7395				82.6457	1	Yes	22.1618	1	Yes	9	43.6728	58.7919	91.8278	194.292
391	2313	709	23	Costa de Chiapas	Margaritas y Coapa	Chiapas	861.451							855.429	0	83.395	0	0	83.395	83.2	0	0	0	0	855.235	0	855.235	9.75112	Low	Yes		0.313146			293.449			2.3241	296.086	1	Yes	218.855	1	Yes	13	98.9888	152.227	87.2411	338.457
392	2314	713	23	Costa de Chiapas	Novillero Alto	Chiapas	462.174							850.029	0	10.298	0.484	0	10.782	2.296	0	0	0	0	841.543	0	841.543	1.28122	Low	Yes					198.818			1.95588	200.774	1	Yes	59.1166	1	Yes	8	14.4876	138.215	60.9097	213.613
393	2315	714	23	Costa de Chiapas	Sesecapa	Chiapas	489.301							532.769	0	1.002	0	0	1.002	0.674	0	0	0	0	532.441	0	532.441	0.18819	Low	Yes					170.293				170.293	1	Yes	77.2027	1	Yes	9	75.6662	44.0015	109.782	229.449
394	2316	715	23	Costa de Chiapas	Cacaluta	Chiapas	644.418							1025.27	0	25.168	0	0	25.168	6.104	0	0	0	0	1006.2	0	1006.2	2.50128	Low	Yes					226.212		1.11276		227.324	1	Yes	136.004	1	Yes	15	174.559	169.544	52.794	396.896
395	2317	716	23	Costa de Chiapas	Laguna del Viejo y Temblader	Chiapas	450.457							738.23	0	178.656	0.334	0	178.991	169.194	0	0	0	0	728.434	0	728.434	24.572	Medium	Yes					104.194		132.46		236.654	1	Yes	43.3234	1	Yes	15	171.266	68.3047	109.401	348.971
396	2318	717	23	Costa de Chiapas	Despoblado	Chiapas	1050.53							1558.22	0	22.232	0.022	0	22.254	5.742	0	0	0	0	1541.7	0	1541.7	1.44347	Low	Yes					341.805		122.631		464.436	1	Yes	341.826	1	Yes	25	316.901	115.064	171.394	603.358
397	2319	718	23	Costa de Chiapas	Huixtla	Chiapas	822.564							1099.49	0	16.486	0.272	0	16.757	6.457	0	0	0	0	1089.46	0	1089.46	1.5381	Low	Yes					92.334				92.334	1	Yes	92.3551	1	Yes	15	113.319	97.3836	195.689	406.392
398	2320	720	23	Costa de Chiapas	Huehuetán	Chiapas	841.828							1575.33	0	120.045	0.498	0	120.543	30.184	0	0	0	0	1484.97	0	1484.97	8.11754	Low	Yes					138.064				138.064	1	Yes	138.088	1	Yes	18	115.571	96.3317	224.446	436.348
399	2321	719	23	Costa de Chiapas	Coatán	Chiapas	377.014							456.47	292.39	570.23	0.016	0	570.246	501.345	0	0	0	0	679.959	0	679.959	83.8648	Very high	Yes					26.5185		66.9255	0.503456	93.9475	1	Yes	11.0732	1	Yes	10	66.7921	44.3867	146.454	257.633
400	2322	724	23	Costa de Chiapas	Puerto Madero	Chiapas	401.59							311.012	0	19.688	0	0	19.688	3.997	0	0	0	0	295.32	0	295.32	6.66667	Low	Yes							32.9902		32.9902	1	Yes	34.4268	1	Yes	7	27.229	25.6476	110.49	163.367
401	2323	722	23	Costa de Chiapas	Cahuacán	Chiapas	278.772							390.516	0	52.061	0.663	0	52.725	11.076	0	0	0	0	348.867	0	348.867	15.1132	Medium	Yes					11.6221		20.3723		31.9944	1	Yes	3.46956	1	Yes	6	57.2482	3.20467	83.2654	143.718
402	2324	723	23	Costa de Chiapas	Cozoloapan	Chiapas	276.32							175.384	0	27.931	0.182	0	28.113	5.721	0	0	0	0	152.992	0	152.992	18.3755	Medium	Yes							20.3065	1.50713	21.8136	1	Yes	21.2925	1	Yes	3	24.4901	0	73.7044	98.1945
403	2325	721	23	Costa de Chiapas	Suchiate	Chiapas	212.042							270.422	1293.61	247.572	0.32	0	247.892	50.563	0	0	0	0	1366.71	0	1366.71	18.1379	Medium	Yes					27.2355		34.2676		61.5031	1	Yes	4.86373	1	Yes	6	45.733	34.1224	47.1594	127.015
415	2401	23	24	Bravo-Conchos	Río Bravo 1	Chihuahua	3323.7							70.642	0	60.597	64.854	0	125.451	99.386	78.3	0	0	0	122.878	140.002	-17.124	0	Very high	Yes	21.4779								21.4779	1	No	0	0	Yes	4	0	17.5777	77.8654	95.4431
416	2402	41	24	Bravo-Conchos	Río Bravo 2	Chihuahua	3591.67							20.572	122.878	1.246	0	0	1.246	0	0	0	0	0	142.204	162.195	-19.991	0	Very high	No									0	0	No	0	0	Yes	18	115.026	124.546	161.861	401.434
404	2403	136	24	Bravo-Conchos	Río Florido 1	Chihuahua, Durango	1467.99							129.3	0	1.349	0	0	1.349	0	0	0	18.665	0	109.286	1295.16	-265.964	0	Very high	No									0	0	No	0	0	Yes	30	31.0428	215.528	517.546	764.117
405	2404	145	24	Bravo-Conchos	Río Florido 2	Durango	1279.35							54.017	109.286	19.181	0	0	19.181	0	0	0	0	0	144.122	1295.16	-265.964	0	Very high	No									0	0	No	0	0	Yes	23	50.1027	61.3934	456.161	567.657
406	2405	131	24	Bravo-Conchos	Río Florido 3	Durango, Chihuahua	4992.29							18.551	144.122	162.963	0	0	162.963	0	0	0	3.636	0	-3.925	1295.16	-265.964	0	Very high	No									0	0	No	0	0	Yes	36	254.838	75.003	555.88	885.721
407	2406	127	24	Bravo-Conchos	Río Parral	Chihuahua	1625.46							56.517	0	12.313	0	0	12.313	8.721	0	0	0	0	52.925	1295.16	-265.964	0	Very high	No									0	0	No	0	0	Yes	5	58.4719	24.8226	58.5247	141.819
408	2407	144	24	Bravo-Conchos	Río Balleza	Chihuahua, Durango	1188.09							78.016	0	0.259	0	0	0.259	0	0	0	0	0	77.756	1295.16	-265.964	0	Very high	No									0	0	No	0	0	Yes	19	43.7471	351.308	67.0046	462.059
409	2408	110	24	Bravo-Conchos	Río Conchos 1	Chihuahua ,Durango	19626.5							1044.54	77.756	772.102	0.48	0	772.582	0	0	0	193.543	0	156.17	1295.16	-265.964	0	Very high	Yes	196.878							72.3279	269.206	1	No	0	0	Yes	342	954.595	3977.99	3629.96	8562.55
411	2409	91	24	Bravo-Conchos	Río Conchos 2	Chihuahua	10855.2							409.145	268.245	2003.81	2.924	0	2006.74	1717.78	0	0	0	0	388.428	1295.16	-265.964	0	Very high	No									0	0	Yes	7.4313	1	Yes	70	430.392	250.005	1128.49	1808.89
413	2410	100	24	Bravo-Conchos	Río Conchos 3	Chihuahua	6565.98							72.194	392.489	239.895	0	0	239.895	62.756	0	0	51.32	0	236.224	1295.16	-265.964	0	Very high	Yes				14.7352					14.7352	1	No	0	0	Yes	23	210.453	126.555	221.055	558.064
414	2411	99	24	Bravo-Conchos	Río Conchos 4	Chihuahua	8726.44							104.216	236.224	109.421	0	0	109.421	189	0	0	0	0	420.019	1295.16	-265.964	0	Very high	Yes								13.5644	13.5644	1	No	0	0	Yes	51	262.484	448.455	581.241	1292.18
410	2412	85	24	Bravo-Conchos	Río San Pedro	Chihuahua	10650.9							372.331	0	268.591	0.341	0	268.932	0	0	0	44.248	0	59.15	1295.16	-265.964	0	Very high	Yes				32.1768					32.1768	1	No	0	0	Yes	76	310.572	271.768	1329.08	1911.42
412	2413	63	24	Bravo-Conchos	Río Chuviscar	Chihuahua	419.535							6.78	0	0.102	0	0	0.102	0	0	0	2.617	0	4.061	1295.16	-265.964	0	Very high	No									0	0	No	0	0	Yes	1	16.9385	0	2.53859	19.4771
417	2414	71	24	Bravo-Conchos	Río Bravo 3	Chihuahua	6095.7							26.767	562.223	18.814	0	0	18.814	1.849	0	0	0	0	572.024	1413.05	-571.495	0	Very high	Yes	2355.75		5.21591						2360.97	1	No	0	0	Yes	44	313.294	328.464	463.041	1104.8
418	2415	65	24	Bravo-Conchos	Río Bravo 4	Coahuila de Zaragoza, Chihuahua	14659.2							193.899	572.024	2.007	0	0	2.007	0	0	0	0	0	763.916	1413.05	-571.495	0	Very high	Yes	5898.06	238.795	9.03081					547.861	6693.74	1	No	0	0	Yes	52	106.809	299.643	923.991	1330.44
419	2416	66	24	Bravo-Conchos	Río Bravo 5	Coahuila de Zaragoza	6469.76							205.406	763.916	677.232	0	0	677.232	0	0	0	160.103	0	131.988	1413.05	-571.495	0	Very high	Yes		15.6252	2.2015						17.8267	1	No	0	0	Yes	36	193.158	101.468	621.566	916.191
420	2417	73	24	Bravo-Conchos	Río Bravo 6	Coahuila de Zaragoza	219.937							12.104	131.988	3.73	0	0	3.73	677.232	0	0	0	0	817.594	1413.05	-571.495	0	Very high	No									0	0	No	0	0	Yes	3	6.84028	12.9627	75.2151	95.018
421	2418	78	24	Bravo-Conchos	Arroyo de las Vacas	Coahuila de Zaragoza	868.375							17.277	0	0.01	0	0	0.01	0	0	0	0	0	17.267	1295.16	-265.964	0	Very high	Yes				0.425258					0.425258	1	No	0	0	Yes	9	21.0911	26.7414	172.334	220.166
422	2419	84	24	Bravo-Conchos	Río San Diego	Coahuila de Zaragoza	2127.59							206.812	0	47.025	0	0	47.025	0	0	0	3.987	0	155.8	1295.16	-265.964	0	Very high	Yes		0.326762							0.326762	1	No	0	0	Yes	27	16.7945	57.2558	571.042	645.092
423	2420	75	24	Bravo-Conchos	Río Bravo 7	Coahuila de Zaragoza	362.441							37.429	990.661	20.278	0	0	20.278	0	0	0	0	0	1007.81	1413.05	-571.495	0	Very high	No									0	0	No	0	0	Yes	3	27.4277	23.8512	52.2189	103.498
424	2421	93	24	Bravo-Conchos	Río San Rodrigo	Coahuila de Zaragoza	1907.01							120.152	0	1.885	0	0	1.885	0	0	0	4.504	0	113.763	1295.16	-265.964	0	Very high	Yes		32.8046					175.74		208.544	1	No	0	0	Yes	30	75.0014	335.569	342.796	753.367
425	2422	89	24	Bravo-Conchos	Río Bravo 8	Coahuila de Zaragoza	1200.69							8.906	1121.57	20.54	0	0	20.54	0	0	0	0	0	1109.94	1413.05	-571.495	0	Very high	Yes							4.28929		4.28929	1	No	0	0	Yes	16	41.5321	47.3644	339.702	428.598
426	2423	98	24	Bravo-Conchos	Río Escondido	Coahuila de Zaragoza	2870.9							61.325	0	0.891	0	0	0.891	0	0	0	0	0	60.434	1295.16	-265.964	0	Very high	Yes		7.34483					55.5678		62.9126	1	Yes	1.78773	1	Yes	16	44.0552	13.6212	349.198	406.874
427	2424	97	24	Bravo-Conchos	Río Bravo 9	Coahuila de Zaragoza	3044.45							14.737	1170.37	54.569	0	0	54.569	0	0	0	0	0	1130.54	1413.05	-571.495	0	Very high	No									0	0	Yes	361.906	1	Yes	38	5.94572	339.59	598.284	943.821
428	2425	108	24	Bravo-Conchos	Río Bravo 10	Nuevo León, Coahuila de Zaragoza, Tamaulipas	4012.27							85.999	1130.54	75.281	0	0	75.281	0	0	0	0	0	1141.26	1413.05	-571.495	0	Very high	No									0	0	Yes	93.521	1	Yes	48	2.1229	87.3533	1165.62	1255.1
429	2426	92	24	Bravo-Conchos	Río Sabinas	Coahuila de Zaragoza	17059.5							378.784	0	30.089	0	0	30.089	0	0	0	0	0	348.695	1295.16	-265.964	0	Very high	Yes	22.0871	7522.94					23.3735		7568.4	1	Yes	2186.84	1	Yes	89	774.309	780.233	661.681	2216.22
430	2427	115	24	Bravo-Conchos	Río Nadadores	Coahuila de Zaragoza, Nuevo León	21596.5							113.945	0	63.404	0	0	63.404	0	0	0	0	0	50.542	1295.16	-265.964	0	Very high	Yes	836.099	6601.54					314.019		7751.66	1	Yes	834.953	1	Yes	70	711.52	247.714	816.679	1775.91
431	2428	103	24	Bravo-Conchos	Río Salado	Nuevo León, Coahuila de Zaragoza, Tamaulipas	22927.1							333.385	399.237	322.509	0	0	322.509	9.055	0	0	157.251	0	261.917	1295.16	-265.964	0	Very high	Yes		137.745							137.745	1	Yes	3354.36	1	Yes	231	1013.03	2158.18	2586.07	5757.28
432	2429	122	24	Bravo-Conchos	Río Bravo 11	Nuevo León, Tamaulipas	4173.12							37.127	1403.18	1627.93	0.3	0	1628.23	1624.26	0	0	163.049	0	1273.28	1413.05	-571.495	0	Very high	No									0	0	No	0	0	Yes	77	471.525	267.874	1216.03	1955.43
433	2430	139	24	Bravo-Conchos	Río Álamo	Nuevo León, Tamaulipas	4552.79							109.999	0	9.097	0	0	9.097	0	0	37	33.108	0	30.793	41.461	-10.668	0	Very high	Yes							531.272		531.272	1	No	0	0	Yes	62	269.064	496.112	755.018	1520.19
434	2431	156	24	Bravo-Conchos	Río Salinas	Coahuila de Zaragoza, Nuevo León	9795.44							33.997	0	27.167	0.12	0	27.287	0	0	0	0	0	6.71	7.529	-0.818	0	Very high	Yes		259.125					337.094		596.219	1	No	0	0	Yes	9	125.003	0	108.406	233.409
435	2432	150	24	Bravo-Conchos	Río Pesquería	Nuevo León, Coahuila de Zaragoza	7761.79							103.52	6.71	153.457	0	0	153.457	0	99.862	0	0	0	56.635	82.257	-25.622	0	Very high	Yes		149.356		70.1202			556.356		775.833	1	No	0	0	Yes	78	724.555	375.832	869.137	1969.52
436	2433	169	24	Bravo-Conchos	Río San Juan 1	Nuevo León, Coahuila de Zaragoza	8618.17							774.68	0	600.712	0	0	600.712	99.862	139.193	104.19	127.179	0	181.654	263.835	-82.181	0	Very high	Yes		1542.78	59.8357	1687.06			160.784		3450.46	1	No	0	0	Yes	145	1172.56	511.886	1939.38	3623.83
437	2434	161	24	Bravo-Conchos	Río San Juan 2	Nuevo León	1613.76							25.893	238.289	24.138	0	0	24.138	0	4.328	0	0	0	244.372	365.848	-121.475	0	Very high	Yes				0.0887014					0.0887014	1	No	0	0	Yes	27	162.4	260.862	252.644	675.906
438	2435	152	24	Bravo-Conchos	Río San Juan 3	Tamaulipas, Nuevo León	2916.56							221.82	244.372	552.661	0	0	552.661	0	37	0	200.665	0	-250.133	0	-250.133	0	Very high	Yes				0.00291014					0.00291014	1	No	0	0	Yes	62	313.821	176.452	1086.12	1576.39
439	2436	146	24	Bravo-Conchos	Río Bravo 12	Tamaulipas, Nuevo León	2175.52							105.598	872.353	1316.75	0	0	1316.75	0	0	0	0	0	-338.797	0	-338.797	0	Very high	No									0	0	No	0	0	Yes	34	169.809	112.86	530.579	813.248
440	2437	160	24	Bravo-Conchos	Río Bravo 13	Nuevo León, Tamaulipas	7734.52							23.868	0	96.307	0	0	96.307	55.035	0	0	0	0	-17.403	0	-17.403	0	Very high	Yes	952.966						2.18457		955.151	1	No	0	0	Yes	165	1104.75	645.048	2321.43	4071.23
441	2501	208	25	San Fernando-Soto La Marina	Río Pilón 1	Nuevo León, Tamaulipas	242.506							63.008	0	1.688	0	0	1.688	0.358	0	0	0	0	61.678	61.678	0	0	Very high	No									0	0	No	0	0	Yes	2	0	20.481	27.8711	48.3521
442	2502	210	25	San Fernando-Soto La Marina	Río Pilón 2	Nuevo León, Tamaulipas	2353.07							79.761	61.678	56.206	0.06	0	56.266	11.294	14	0	10.827	-20.4	120.04	120.04	0	0	Very high	No									0	0	No	0	0	Yes	35	0	60.6197	787.972	848.592
443	2503	217	25	San Fernando-Soto La Marina	Río Blanco	Nuevo León, Tamaulipas	1750.8							132.488	0	24.942	0	0	24.942	24.938	0	0	0	0	132.484	132.484	0	0	Very high	Yes							0.62401	169.428	170.052	1	No	0	0	Yes	18	77.7478	5.67013	388.786	472.204
444	2504	220	25	San Fernando-Soto La Marina	Río San Antonio	Nuevo León, Tamaulipas	414.95							119.015	0	13.221	0	0	13.221	2.645	0	0	0	0	108.439	108.439	0	0	Very high	No									0	0	No	0	0	Yes	5	0	0	145.548	145.548
445	2505	229	25	San Fernando-Soto La Marina	Río Purificación 1	Nuevo León, Tamaulipas	1217.75							249.998	240.923	81.523	0	0	81.523	16.327	0	14	2.66	1.5	407.565	407.565	0	0	Very high	No									0	0	No	0	0	Yes	15	81.8171	50.0014	207.683	339.502
446	2506	235	25	San Fernando-Soto La Marina	Río Purificación 2	Tamaulipas	278.301							118.041	407.565	47.612	0	0	47.612	9.847	0	0	0	0	487.841	487.841	0	0	Very high	No									0	0	No	0	0	Yes	9	100.859	57.3162	66.9311	225.106
447	2507	237	25	San Fernando-Soto La Marina	Río Corona	Tamaulipas	1377.46							206.339	0	57.295	0	0	57.295	11.484	0	0	0	0	160.528	160.528	0	0	Very high	Yes							97.06		97.06	1	No	0	0	Yes	21	56.7757	75.0021	410.71	542.488
448	2508	254	25	San Fernando-Soto La Marina	Arroyo Grande	Tamaulipas	1875.87							34.691	0	7.88	0	0	7.88	1.597	0	0	3.552	0.5	24.356	24.356	0	0	Very high	Yes					246.316				246.316	1	No	0	0	Yes	11	27.6576	25.0007	224.365	277.024
449	2509	205	25	San Fernando-Soto La Marina	Área no aforada	Tamaulipas	4582.2							283.773	792.765	83.511	0	0	83.511	44.684	0	577.638	414.604	45.47	-0.001	0	-0.001	0	Very high	Yes					431.605		167.587		599.192	1	No	0	0	Yes	35	106.269	176.93	626.24	909.438
450	2510	238	25	San Fernando-Soto La Marina	Río Soto La Marina 1	Tamaulipas	118.741							16.297	0	220.937	0	0	220.937	44.987	220.937	0	1.676	0	59.608	5.926	53.682	414.688	Very high	Yes							11.1669		11.1669	1	No	0	0	Yes	4	25.0007	28.4335	42.2809	95.715
451	2511	213	25	San Fernando-Soto La Marina	Río Soto La Marina 2	Tamaulipas	3362.57							284.28	59.608	36.424	0	0	36.424	7.645	268.4	0	1.551	1.5	580.458	22.154	558.304	7.07052	Low	Yes					279.247		206.103		485.35	1	No	0	0	Yes	17	66.7915	46.5684	281.427	394.787
452	2512	260	25	San Fernando-Soto La Marina	Río Palmas	Tamaulipas	1562.9							91.711	0	6.108	0	0	6.108	1.208	0	0	7.487	-0.4	79.724	3.043	76.681	17.2077	Medium	Yes					715.721				715.721	1	No	0	0	Yes	17	0	79.0107	354.457	433.467
453	2513	240	25	San Fernando-Soto La Marina	Río Soto La Marina 3	Tamaulipas	1366.07							89.766	660.182	28.865	0	0	28.865	6.346	0	0	0	0	727.429	0	727.429	3.96808	Low	Yes	268.899				42.4489				311.348	1	No	0	0	Yes	15	78.1585	45.5197	234.338	358.016
454	2514	250	25	San Fernando-Soto La Marina	Laguna Morales	Tamaulipas	506.212							88.876	0	0.276	0	0	0.276	0.139	0	0	0	0	88.738	0	88.738	0.311028	Low	Yes	169.42								169.42	1	No	0	0	Yes	12	55.5832	31.9996	243.537	331.12
455	2515	264	25	San Fernando-Soto La Marina	Tepehuajes	Tamaulipas	268.324							51.637	0	3.843	0	0	3.843	2.021	0	0	0	0	49.815	0	49.815	7.71454	Low	Yes	39.0071								39.0071	1	No	0	0	Yes	8	0	187.75	3.56975	191.32
456	2516	271	25	San Fernando-Soto La Marina	Barra de Ostiones	Tamaulipas	120.66	San Fernando - Soto La Marina	6 de Junio de 2018	11.621				24.523	0	1.114	0	0	1.114	0.227	0	0	0	0	23.636	11.621	12.015	4.71315	Low	Yes	1.57871					0.00830319			1.58701	1	Yes	0.00654511	1	Yes	2	0.755765	54.2128	8.93767	63.9062
457	2517	277	25	San Fernando-Soto La Marina	Barra Carrizos	Tamaulipas	113.638	San Fernando - Soto La Marina	6 de Junio de 2018	10.81	6 de Junio de 2018	0.005		21.602	0	0.016	0	0.005	0.021	0.009	0	0	0	0	21.59	10.81	10.78	0.0972673	Low	Yes						0.229796			0.229796	1	Yes	0.085941	1	Yes	3	9.09883	67.9409	0.22628	77.266
458	2518	278	25	San Fernando-Soto La Marina	Barra de San Vicente	Tamaulipas	133.836	San Fernando - Soto La Marina	6 de Junio de 2018	12.432				27.194	0	0.004	0	0	0.004	0.002	0	0	0	0	27.192	12.432	14.76	0.0147102	Low	Yes						0.272287			0.272287	1	Yes	0.213253	1	Yes	5	61.3782	71.7544	0.703856	133.836
459	2519	268	25	San Fernando-Soto La Marina	Río San Rafael 1	Tamaulipas	451.995							82.137	0	0.58	0	0	0.58	0.172	0	8.62	10.207	-0.261	63.163	6.942	56.221	34.0549	Medium	Yes					219.926				219.926	1	No	0	0	Yes	6	0	25.2222	128.813	154.036
460	2520	276	25	San Fernando-Soto La Marina	Río San Rafael 2	Tamaulipas	641.393							93.853	63.163	2.637	0	0	2.637	0.558	8.62	0	0	0	163.558	15.63	147.928	1.78262	Low	Yes					159.397				159.397	1	No	0	0	Yes	13	52.159	104.577	221.24	377.976
461	2521	283	25	San Fernando-Soto La Marina	Río San Rafael 3	Tamaulipas	447.91							68.804	163.558	11.409	12.452	0	23.861	17.334	0	0	0	0	225.834	0	225.834	10.5657	Medium	No									0	0	No	0	0	Yes	17	25.8446	230.995	112.361	369.201
462	2522	288	25	San Fernando-Soto La Marina	Río Tigre 1	Tamaulipas	504.93							95.853	0	10.097	0	0	10.097	2.726	0	0	0	0	88.482	17.132	71.35	14.1514	Medium	Yes					109.909			2.1078	112.017	1	No	0	0	Yes	17	91.5417	178.991	160.627	431.16
463	2523	291	25	San Fernando-Soto La Marina	Río Tigre 2	Tamaulipas	647.517							48.763	88.482	32.438	0.007	0	32.445	30.32	0	0	0	0	135.12	0	135.12	24.012	Medium	No									0	0	No	0	0	Yes	18	21.3722	173.824	257.543	452.739
464	2524	285	25	San Fernando-Soto La Marina	Río Barberena 1	Tamaulipas	1310.26							62.389	0	5.723	0.622	0	6.345	1.364	0	0	0	0	57.408	8.878	48.53	13.0744	Medium	Yes					158.107				158.107	1	No	0	0	Yes	26	55.4856	273.576	299.915	628.977
465	2525	301	25	San Fernando-Soto La Marina	Río Barberena 2	Tamaulipas	631.063							81.269	57.408	23.74	0	0	23.74	14.83	0	0	0	0	129.768	0	129.768	18.2942	Medium	No									0	0	No	0	0	Yes	12	0	76.4757	221.42	297.895
466	2526	290	25	San Fernando-Soto La Marina	Laguna San Andrés	Tamaulipas	285.752							35.707	0	0.038	0	0	0.038	0.01	0	0	0	0	35.679	0	35.679	0.106505	Low	No									0	0	No	0	0	Yes	6	0	4.23559	158.862	163.098
467	2527	309	25	San Fernando-Soto La Marina	Laguna Las Marismas	Tamaulipas	183.258							26.417	0	0.052	0.003	0	0.055	0.041	0	0	0	0	26.403	0	26.403	0.20831	Low	No									0	0	No	0	0	Yes	1	24.3773	0	0	24.3773
468	2528	193	25	San Fernando-Soto La Marina	Río Potosí 1	Nuevo León	1128.67	San Fernando - Soto La Marina	6 de Junio de 2018	16.338	6 de Junio de 2018	1.316		93.688	0	4.282	0	1.316	5.598	0.856	0	0	0	0	88.946	87.451	1.496	31.3895	Medium	Yes		0.57718					4.47381	25.0319	30.0829	1	No	0	0	Yes	22	87.3536	50.0013	356.067	493.422
469	2529	195	25	San Fernando-Soto La Marina	Río Potosí 2	Nuevo León	472.106	San Fernando - Soto La Marina	6 de Junio de 2018	10.808	6 de Junio de 2018	0.215		58.067	88.946	19.959	0.6	0.215	20.774	4.11	0	71.242	0	0	59.108	56.567	2.541	689.31	Very high	No									0	0	No	0	0	Yes	8	0.809066	0	194.131	194.94
470	2530	199	25	San Fernando-Soto La Marina	Río Camacho	Nuevo León	431.927	San Fernando - Soto La Marina	6 de Junio de 2018	14.839	6 de Junio de 2018	0.682		88.426	0	3.958	0	0.682	4.64	0.792	0	0	0	0	84.578	83.223	1.354	28.6544	Medium	No									0	0	No	0	0	Yes	7	60.5107	53.1122	83.8946	197.517
471	2531	202	25	San Fernando-Soto La Marina	Río Pablillo 1	Tamaulipas, Nuevo León	974.971	San Fernando - Soto La Marina	6 de Junio de 2018	20.358				110.999	0	1.256	0	0	1.256	0.251	0	0	0	0	109.994	108.233	1.761	5.67838	Low	Yes							7.90125	29.1323	37.0336	1	No	0	0	Yes	20	33.8819	70.998	346.628	451.507
472	2532	197	25	San Fernando-Soto La Marina	Río Pablillo 2	Nuevo León	169.873	San Fernando - Soto La Marina	6 de Junio de 2018	30.909	6 de Junio de 2018	9.192		71.834	194.572	19.138	0	9.192	28.33	3.828	0	141.237	0.031	0	100.636	96.309	4.327	481.32	Very high	No									0	0	No	0	0	Yes	4	29.4038	8.21396	74.0135	111.631
473	2533	198	25	San Fernando-Soto La Marina	Arroyo Los Anegados o Conchos 2	Nuevo León, Tamaulipas	1471.5	San Fernando - Soto La Marina	6 de Junio de 2018	10.476				57.269	0	16.712	0	0	16.712	3.347	0	0	0	0	43.904	42.016	1.888	135.167	Very high	Yes							41.0357		41.0357	1	Yes	5.56892	1	Yes	10	37.4455	2.34216	227.396	267.184
474	2534	190	25	San Fernando-Soto La Marina	Río Conchos	Tamaulipas, Nuevo León	949.705	San Fernando - Soto La Marina	6 de Junio de 2018	61.0774				89.347	203.648	24.328	0	0	24.328	4.868	0	47.812	0	0	225.722	212.916	12.807	97.639	Very high	Yes							10.3776		10.3776	1	No	0	0	Yes	14	24.5582	49.954	277.673	352.185
475	2535	168	25	San Fernando-Soto La Marina	Río San Lorenzo	Nuevo León, Tamaulipas	4555.81	San Fernando - Soto La Marina	6 de Junio de 2018	85.039	6 de Junio de 2018	0.077		289.524	0	0.881	0	0.077	0.958	0.205	2.044	0	0	0	290.815	274.315	16.5	0.94348	Low	No									0	0	No	0	0	Yes	52	113.179	0	1186	1299.17
476	2536	192	25	San Fernando-Soto La Marina	Río Burgos	Tamaulipas	508.883	San Fernando - Soto La Marina	6 de Junio de 2018	8.776	6 de Junio de 2018	0.005		50.083	0	1.558	0	0.005	1.563	0.375	0	0	0	0	48.895	46.121	2.774	13.5325	Medium	No									0	0	No	0	0	Yes	9	24.818	14.2107	177.932	216.96
477	2537	183	25	San Fernando-Soto La Marina	Río San Fernando 1	Tamaulipas, Nuevo León	4239.91	San Fernando - Soto La Marina	6 de Junio de 2018	385.648	6 de Junio de 2018	3.818		414.696	565.432	3.775	0	3.818	7.593	0.833	0	575.862	0	0	397.506	341.85	55.656	132.212	Very high	Yes							2.43916		2.43916	1	No	0	0	Yes	56	50.1581	85.8392	1266.82	1402.81
478	2538	203	25	San Fernando-Soto La Marina	Arroyo Chorreras o Las Norias	Tamaulipas	1754.21	San Fernando - Soto La Marina	6 de Junio de 2018	70.846				169.235	0	4.954	0.3	0	5.254	4.355	0	0	0	0	168.336	144.767	23.569	5.56479	Low	No									0	0	No	0	0	Yes	18	57.1661	86.9735	327.469	471.609
479	2539	194	25	San Fernando-Soto La Marina	Río San Fernando 2	Tamaulipas	998.471	San Fernando - Soto La Marina	6 de Junio de 2018	550				84.797	565.842	12.204	0	0	12.204	3.096	0	0	0	0	641.531	550	91.531	1.90232	Low	Yes	219.003								219.003	1	Yes	219.001	1	Yes	22	214.124	182.593	159.546	556.263
480	2540	172	25	San Fernando-Soto La Marina	Laguna Madre Norte	Nuevo León, Tamaulipas	4995.07	San Fernando - Soto La Marina	6 de Junio de 2018	82.171				165.313	0	1.334	0	0	1.334	0.341	0	0	0	0	164.319	82.171	82.148	0.811836	Low	Yes	1101.24								1101.24	1	Yes	1028.14	1	Yes	82	233.11	399.57	1396.54	2029.22
481	2541	196	25	San Fernando-Soto La Marina	Barra Jesús María	Tamaulipas	1236.62	San Fernando - Soto La Marina	6 de Junio de 2018	46.725	6 de Junio de 2018	0.219		99.846	0	2.704	0	0.219	2.923	2.607	0	0	0	0	99.531	46.725	52.806	2.93677	Low	Yes	374.72								374.72	1	Yes	219.501	1	Yes	25	245.119	93.7141	240.991	579.824
482	2542	214	25	San Fernando-Soto La Marina	Arroyos Chapote-Temascal	Tamaulipas	501.412							46.393	0	3.312	0	0	3.312	3.312	0	0	0	0	46.393	0	46.393	7.13901	Low	Yes	16.074								16.074	1	No	0	0	Yes	10	88.9184	67.9196	117.217	274.055
483	2543	219	25	San Fernando-Soto La Marina	Arroyos Olivares-Paxtle	Tamaulipas	508.535							44.635	0	1.484	0	0	1.484	0.331	0	0	0	0	43.482	0	43.482	3.41291	Low	Yes	150.077								150.077	1	No	0	0	Yes	16	86.591	188.117	124.211	398.92
484	2544	218	25	San Fernando-Soto La Marina	Arroyos La Misión-Santa Rosa	Tamaulipas	1046.76							72.488	0	1.182	0	0	1.182	0.237	0	0	0	0	71.544	0	71.544	1.65213	Low	Yes	62.8088								62.8088	1	No	0	0	Yes	7	1.36773	0	150.067	151.435
485	2545	227	25	San Fernando-Soto La Marina	Arroyos Calanche-Venados	Tamaulipas	942.8							64.915	0	1.18	0	0	1.18	0.238	0	0	0	0	63.973	0	63.973	1.84453	Low	Yes	185.111								185.111	1	No	0	0	Yes	12	49.9609	59.0264	222.214	331.201
486	2601	442	26	Pánuco	Arroyo Zarco	Estado de México, Hidalgo	619.38	Pánuco	6 de Junio de 2018	0.109				40.034	0	28.036	0.007	0	28.043	5.82	0	0	27.872	1.122	-11.183	0	-11.183	0	Very high	Yes							601.059		601.059	1	No	0	0	Yes	1	17.6779	0	0	17.6779
487	2602	445	26	Pánuco	Río Ñado	Estado de México, Querétaro de Arteaga	499.856	Pánuco	6 de Junio de 2018	0				35.942	0	14.358	0	0	14.358	3.584	0	21.859	1.354	0.624	1.331	1.327	0.004	954875	Very high	Yes							145.523		145.523	1	No	0	0	Yes	3	0	0	73.4928	73.4928
488	2603	429	26	Pánuco	Río Galindo	Querétaro de Arteaga, Michoacán de Ocampo	415.803	Pánuco	6 de Junio de 2018	0				43.822	0	20.661	0	0	20.661	4.502	0	21.135	6.147	2.454	-2.074	0	-2.074	0	Very high	No									0	0	No	0	0	Yes	0	0.130723	0	0	0.130723
489	2604	407	26	Pánuco	Río San Juan 1	Estado de México, Querétaro de Arteaga, Hidalgo	1887.02	Pánuco	6 de Junio de 2018	0.936				87.319	1.331	69.36	0	0	69.36	10.85	42.995	28.567	4.018	-0.003	40.553	40.133	0.419	7523.39	Very high	Yes							93.8993		93.8993	1	No	0	0	Yes	3	27.1044	0	49.7173	76.8218
490	2605	420	26	Pánuco	Río Tecozautla	Estado de México, Hidalgo, Querétaro de Arteaga	1257.75	Pánuco	6 de Junio de 2018	0.421				71.351	0	35.292	0	0	35.292	6.969	2.684	0	0	0	45.713	45.162	0.551	3630.86	Very high	Yes							30.5346	0.980259	31.5149	1	No	0	0	Yes	4	0	0	107.446	107.446
491	2606	404	26	Pánuco	Río San Juan 2	Querétaro de Arteaga, Hidalgo	463.188	Pánuco	6 de Junio de 2018	1.04				13.868	40.553	11.044	0	0	11.044	23.245	0	0	0	0	66.622	65.819	0.803	599.24	Very high	No									0	0	No	0	0	Yes	3	25.0009	0	43.2661	68.2669
492	2607	732	26	Pánuco	Río Grande de Tulancingo	Hidalgo, Puebla	706.957	Pánuco	6 de Junio de 2018	2.668				49.04	0	60.063	0.232	0	60.295	19.176	0	0	0	0	7.921	5.841	2.08	1269.9	Very high	Yes							2.37947		2.37947	1	No	0	0	Yes	4	99.2953	0	29.748	129.043
493	2608	426	26	Pánuco	Río Metztitlán 1	Hidalgo, Puebla, Veracruz-Llave	1180.67	Pánuco	6 de Junio de 2018	21.962				152.907	7.921	48.574	1.565	0	50.139	22.507	0	0	0	0	133.195	85.05	48.146	71.5168	High	Yes					226.851		2.09137	8.18253	237.125	1	No	0	0	Yes	17	128.638	25.0214	275.075	428.734
494	2609	422	26	Pánuco	Río Metzquititlán	Hidalgo, Veracruz-Llave	228.652	Pánuco	6 de Junio de 2018	4.855				32.37	0	0.851	0.013	0	0.864	0.405	0	0	0	0	31.91	20.376	11.534	5.27183	Low	Yes					10.3542				10.3542	1	No	0	0	Yes	9	20.6069	45.2367	137.442	203.285
495	2610	406	26	Pánuco	Río Metztitlán 2	Hidalgo	714.525	Pánuco	6 de Junio de 2018	39.545				56.794	165.105	57.686	0.021	0	57.707	12.164	0	0	16.933	-1.35	160.774	76.168	84.606	59.033	High	Yes					487.66		0.00367364		487.664	1	Yes	10.6128	1	Yes	16	251.691	83.1827	69.2902	404.164
496	2611	405	26	Pánuco	Río Amajaque	Hidalgo	1470.65	Pánuco	6 de Junio de 2018	16.855				92.028	0	15.654	0.016	0	15.67	8.813	0	0	0	0	85.171	40.35	44.821	25.407	Medium	Yes				22.1708	224.506		5.99165		252.668	1	No	0	0	Yes	18	91.4127	145.158	199.409	435.979
497	2612	382	26	Pánuco	Río Claro	Hidalgo, San Luis Potosí	763.896	Pánuco	6 de Junio de 2018	90.98				497.607	0	3.891	0.058	0	3.949	2.768	0	0	0	0	496.425	233.786	262.639	1.11674	Low	No									0	0	No	0	0	Yes	18	79.0559	159.147	199.831	438.033
498	2613	383	26	Pánuco	Río Amajac	Hidalgo, San Luis Potosí	1756.53	Pánuco	6 de Junio de 2018	267.672				850.486	245.945	5.669	0.187	0	5.856	3.076	0	0	0	0	1093.65	515.043	578.608	0.69197	Low	Yes				99.2397	3.92506		0.426964		103.592	1	No	0	0	Yes	26	128.317	248.317	289.468	666.103
499	2614	389	26	Pánuco	Río Calabozo	Hidalgo, Veracruz-Llave	1481.77	Pánuco	6 de Junio de 2018	217.763				1172.37	0	8.144	0.015	0	8.159	5.515	0	0	0	0	1169.72	680.018	489.705	1.15327	Low	Yes							0.0265172		0.0265172	1	No	0	0	Yes	34	188.585	348.531	314.745	851.862
500	2615	385	26	Pánuco	Río Los Hules	Hidalgo, Veracruz-Llave	1269.97	Pánuco	6 de Junio de 2018	182.411				1006.34	0	6.245	0.427	0	6.672	4.243	0	0	0	0	1003.91	583.621	420.286	1.10702	Low	Yes					0.0452874		0.330485		0.375772	1	No	0	0	Yes	41	343.241	411.206	278.756	1033.2
501	2616	372	26	Pánuco	Río Tempoal 1	Veracruz-Llave, Hidalgo	912.608	Pánuco	6 de Junio de 2018	442.767				248.204	2173.63	394.293	0.045	0	394.338	7.781	0	0	0	0	2035.28	1018.12	1017.16	27.0108	Medium	Yes							0.0357277		0.0357277	1	No	0	0	Yes	21	119.939	324.775	145.12	589.833
502	2617	368	26	Pánuco	Río San Pedro	Hidalgo, Veracruz-Llave, San Luis Potosí	646.304	Pánuco	6 de Junio de 2018	79.283				389.22	0	15.604	0.375	0	15.979	8.671	0	0	0	0	381.912	191.046	190.866	5.91488	Low	No									0	0	No	0	0	Yes	18	87.2108	286.905	45.3588	419.475
503	2618	363	26	Pánuco	Río Tempoal 2	Veracruz-Llave, Hidalgo, San Luis Potosí	964.055	Pánuco	6 de Junio de 2018	572.955				281.419	2417.19	181.794	0.669	0	182.462	7.103	0	0	0	0	2523.25	1171.03	1352.22	9.47769	Low	No									0	0	No	0	0	Yes	21	196.93	207.17	135.744	539.843
504	2619	314	26	Pánuco	Río Verde 1	San Luis Potosí	2003.01	Pánuco	6 de Junio de 2018	4.165				34.36	0	7.166	0.015	0	7.181	1.871	0	0	0	0	29.049	21.294	7.755	60.2433	High	Yes	95.2899			19.3012					114.591	1	No	0	0	Yes	31	96.2885	323.63	381.302	801.22
505	2620	300	26	Pánuco	Río Verde 2	San Luis Potosí	4130.58	Pánuco	6 de Junio de 2018	28.013				113.344	29.049	67.146	0.3	0	67.446	13.585	0	0	0	0	88.532	46.892	41.64	96.8314	Very high	Yes							571.614		571.614	1	No	0	0	Yes	80	934.336	634.922	475.708	2044.97
506	2621	317	26	Pánuco	Río Verde 3	San Luis Potosí, Querétaro de Arteaga	3020.05	Pánuco	6 de Junio de 2018	47.714				92.586	88.532	7.08	0.64	0	7.72	2.072	0	0	0	0	175.47	89.308	86.162	5.76653	Low	Yes					23.1984				23.1984	1	No	0	0	Yes	47	265.959	267.892	615.605	1149.46
507	2622	351	26	Pánuco	Arroyo El Puerquito o San Bartolo	Guanajuato, San Luis Potosí	1270.1	Pánuco	6 de Junio de 2018	0.015				35.735	0	36.502	0.04	0	36.542	1.058	0	0	0	0	0.25	0.25	0.001	228388	Very high	Yes	3.45275			86.5936			51.1062		141.153	1	No	0	0	Yes	26	166.799	274.877	202.451	644.126
508	2623	332	26	Pánuco	Arroyo Altamira	San Luis Potosí, Guanajuato	1714.53	Pánuco	6 de Junio de 2018	0.948				42.109	0.25	41.412	0	0	41.412	2.494	0	0	1.21	0.628	1.603	1.498	0.105	4107.31	Very high	Yes	509.672			219.662					729.334	1	No	0	0	Yes	33	167.085	224.707	450.082	841.874
509	2624	340	26	Pánuco	Río Santa María 1	Guanajuato, San Luis Potosí	2533.09	Pánuco	6 de Junio de 2018	18.2				90.747	1.603	13.917	0.213	0	14.13	3.628	0	63.072	0	0	18.777	12.482	6.295	315.175	Very high	Yes				55.0474	283.435		19.5052		357.988	1	No	0	0	Yes	59	467.531	485.674	512.744	1465.95
510	2625	344	26	Pánuco	Río Santa María 2	Guanajuato, San Luis Potosí, Querétaro de Arteaga	2698.53	Pánuco	6 de Junio de 2018	42.045				122.431	18.777	14.394	0.36	0	14.754	10.379	0	0	0	0	136.833	86.012	50.821	15.8874	Medium	Yes				0.504521	1632.47				1632.97	1	No	0	0	Yes	53	141.294	540.273	606.916	1288.48
511	2626	345	26	Pánuco	Río Santa María 3	Querétaro de Arteaga, Guanajuato, San Luis Potosí	3900.77	Pánuco	6 de Junio de 2018	190.62	6 de Junio de 2018	158		636.946	136.833	34.491	0.122	157.482	192.094	14.711	0	0	0	0	596.397	303.545	292.851	39.7323	Medium	Yes					2755.18				2755.18	1	Yes	14.1972	1	Yes	74	450.325	769.559	632.425	1852.31
512	2627	336	26	Pánuco	Río Tamasopo 1	San Luis Potosí	297.376	Pánuco	6 de Junio de 2018	72.972				308.946	0	3.295	0.016	0	3.31	0.811	0	0	0	0	306.446	160.074	146.372	1.50905	Low	No									0	0	No	0	0	Yes	4	48.4499	24.7481	25.6133	98.8113
513	2628	335	26	Pánuco	Río Tamasopo 2	San Luis Potosí	237.864	Pánuco	6 de Junio de 2018	151.125				345.772	306.446	17.918	0	0	17.918	4.87	0	0	0	0	639.17	325.316	313.855	3.8535	Low	No									0	0	No	0	0	Yes	10	99.2023	36.369	36.9154	172.487
514	2629	316	26	Pánuco	Río Gallinas	San Luis Potosí	707.2	Pánuco	6 de Junio de 2018	96.637				403.248	0	12.552	0	0	12.552	2.877	0	0	0	0	393.573	200.315	193.258	4.32984	Low	No									0	0	No	0	0	Yes	11	169.313	69.3027	132.094	370.71
515	2630	296	26	Pánuco	Río El Salto	San Luis Potosí, Tamaulipas	2371.9	Pánuco	6 de Junio de 2018	171.802				866.137	0	436.334	0.216	0	436.55	400.869	0	0	0	0	830.456	422.674	407.783	75.3211	High	Yes							17.786	11.5932	29.3793	1	No	0	0	Yes	35	176.616	286.826	460.503	923.946
516	2631	295	26	Pánuco	Río Valles	Tamaulipas, San Luis Potosí	1760.49	Pánuco	6 de Junio de 2018	61.426				272.107	0	117.751	3.724	0	121.475	56.183	0	0	0	0	206.814	105.261	101.553	74.5341	High	Yes					129.01				129.01	1	No	0	0	Yes	38	194.896	468.354	264.132	927.381
517	2632	325	26	Pánuco	Río Tampaón 1	San Luis Potosí, Querétaro de Arteaga	1266.6	Pánuco	6 de Junio de 2018	1098.13				1680.42	2841.88	111.098	1.085	0	112.183	70.395	0	0	0	0	4480.51	2225.34	2255.17	3.34545	Low	Yes					44.0089				44.0089	1	Yes	11.6381	1	Yes	21	244.887	143.889	141.652	530.428
518	2633	333	26	Pánuco	Río Choy	San Luis Potosí	118.496	Pánuco	6 de Junio de 2018	56.895				233.389	0	39.26	0	0	39.26	13.89	0	0	0	0	208.018	93.671	114.347	22.9266	Medium	No									0	0	No	0	0	Yes	4	49.1056	17.5618	18.0796	84.747
519	2634	350	26	Pánuco	Río Coy 1	San Luis Potosí	192.731	Pánuco	6 de Junio de 2018	201.411				923.725	0	8.632	0	0	8.632	2.703	0	0	0	0	917.796	474.966	442.829	1.33987	Low	No									0	0	No	0	0	Yes	5	25.4079	19.149	66.8555	111.412
520	2635	347	26	Pánuco	Río Coy 2	San Luis Potosí	478.716	Pánuco	6 de Junio de 2018	232.599				131.418	917.796	42.618	1.2	0	43.818	9.251	0	0	0	0	1014.65	503.946	510.701	5.89506	Low	No									0	0	No	0	0	Yes	11	165.403	5.85186	96.276	267.53
521	2636	339	26	Pánuco	Río Tampaón 2	San Luis Potosí	347.101	Pánuco	6 de Junio de 2018	1353.46				79.892	5495.16	469.668	2.244	0	471.912	19.357	0	0	0	0	5122.5	2306.67	2815.83	11.3188	Medium	No									0	0	No	0	0	Yes	3	37.6077	0	68.0981	105.706
522	2637	375	26	Pánuco	Río Victoria	Querétaro de Arteaga, Guanajuato	1343.62	Pánuco	6 de Junio de 2018	3.171				43.57	0	2.325	0.102	0	2.427	0.753	0	0	0	0	41.895	35.769	6.127	26.1024	Medium	Yes					187.422		143.8		331.222	1	No	0	0	Yes	4	0	7.00071	99.9038	106.904
523	2638	393	26	Pánuco	Río Tolimán	Querétaro de Arteaga, Guanajuato	1033.62	Pánuco	6 de Junio de 2018	2.079				28.761	0	10.637	0	0	10.637	2.826	0	0	0	0	20.949	17.886	3.064	206.825	Very high	Yes							2.33959		2.33959	1	No	0	0	Yes	10	24.3894	0	217.062	241.451
524	2639	387	26	Pánuco	Río Extoraz	Guanajuato, Querétaro de Arteaga	1514.55	Pánuco	6 de Junio de 2018	15.383	6 de Junio de 2018	79		72.62	62.845	7.172	0.203	0	7.375	2.4	0	79	0	0	51.49	31.329	20.161	243.009	Very high	Yes					624.46				624.46	1	No	0	0	Yes	18	202.066	106.945	163.556	472.566
525	2640	399	26	Pánuco	Embalse Zimapán	Hidalgo, Querétaro de Arteaga	737.959	Pánuco	6 de Junio de 2018	304.4				73.717	1030.44	989.433	0	0	989.433	2.219	0	47.304	36.997	-1.42	34.061	20.724	13.337	337.485	Very high	No									0	0	No	0	0	Yes	8	0	65.7815	133.643	199.425
526	2641	386	26	Pánuco	Río Moctezuma 1	Querétaro de Arteaga, Hidalgo	836.551	Pánuco	6 de Junio de 2018	188.946	6 de Junio de 2018	158		49.086	85.551	131.902	0	158	289.902	986.249	0	0	0	0	830.984	392.094	438.891	46.1747	High	Yes					66.9356				66.9356	1	No	0	0	Yes	9	92.0384	59.444	81.5222	233.005
527	2642	378	26	Pánuco	Río Moctezuma 2	Hidalgo, Querétaro de Arteaga, San Luis Potosí	989.001	Pánuco	6 de Junio de 2018	344.575				807.92	830.984	2.649	0.152	0	2.801	1.919	0	0	0	0	1638.02	771.408	866.613	0.231261	Low	Yes				133.708	182.083		0.0522128		315.843	1	No	0	0	Yes	13	131.697	77.8663	105.02	314.583
528	2643	370	26	Pánuco	Río Tancuilín	San Luis Potosí, Querétaro de Arteaga, Hidalgo	331.278	Pánuco	6 de Junio de 2018	89.614				384.719	0	3.804	0	0	3.804	2.614	0	0	0	0	383.53	180.619	202.911	1.3004	Low	Yes					66.7279				66.7279	1	No	0	0	Yes	12	80.2903	97.6527	91.0954	269.038
529	2644	354	26	Pánuco	Río Huichihuayán	San Luis Potosí, Querétaro de Arteaga	991.252	Pánuco	6 de Junio de 2018	177.627				812.179	0	6.446	0	0	6.446	3.654	0	0	0	0	809.387	381.172	428.215	1.06397	Low	Yes					307.099		13.7836		320.883	1	No	0	0	Yes	6	104.558	38.0682	28.1378	170.764
530	2645	353	26	Pánuco	Río Moctezuma 3	San Luis Potosí, Hidalgo, Veracruz-Llave	1530.95	Pánuco	6 de Junio de 2018	1221.53				497.989	4421.01	60.362	2.78	0	63.141	25.657	0	0	0	0	4881.52	2265.49	2616.03	1.64534	Low	No									0	0	No	0	0	Yes	40	267.921	439.157	288.023	995.101
531	2646	343	26	Pánuco	Río Moctezuma 4	Veracruz-Llave, San Luis Potosí	897.07	Pánuco	6 de Junio de 2018	1837.19				167.626	7404.77	189.409	1.591	0	191	39.003	0	0	0	0	7420.4	3341.42	4078.98	3.22844	Low	Yes							0.948417		0.948417	1	No	0	0	Yes	19	58.0468	150.02	273.401	481.467
532	2647	241	26	Pánuco	Río Jaumave-Chihue	Tamaulipas, Nuevo León	3318.81	Pánuco	6 de Junio de 2018	10.967				146.244	0	38.463	0.168	0	38.631	8.05	0	0	0	0	115.663	97.175	18.488	131.153	Very high	Yes							304.613	43.0603	347.674	1	No	0	0	Yes	13	125.004	100.491	121.695	347.19
533	2648	263	26	Pánuco	Río Guayalejo 1	Tamaulipas	351.141	Pánuco	6 de Junio de 2018	36.347				266.448	115.663	0.179	0	0	0.179	0.038	0	0	0	0	381.969	320.885	61.084	0.18372	Low	Yes							114.55		114.55	1	No	0	0	Yes	6	16.6687	96.9504	22.9292	136.548
534	2649	270	26	Pánuco	Río Guayalejo 2	Tamaulipas	1125.58	Pánuco	6 de Junio de 2018	48.607				122.883	381.969	166.485	1.681	0	168.166	25.519	0	0	0	0	362.205	277.389	84.816	126.04	Very high	Yes					422.96		20.0242		442.984	1	No	0	0	Yes	6	10.3471	25.0007	96.5979	131.946
535	2650	273	26	Pánuco	Río Sabinas	Tamaulipas	606.117	Pánuco	6 de Junio de 2018	66.105				528.863	0	20.71	0.288	0	20.998	4.313	0	0	0	0	512.178	392.243	119.935	11.2868	Medium	Yes							316.823		316.823	1	No	0	0	Yes	7	56.346	3.05265	109.976	169.374
536	2651	281	26	Pánuco	Río Comandante 1	Tamaulipas	2477.08	Pánuco	6 de Junio de 2018	27.251				248.041	0	32.096	1.604	0	33.7	6.879	0	0	0	0	221.22	170.447	50.773	43.1918	High	Yes							631.383	15.4288	646.812	1	No	0	0	Yes	42	191.325	286.431	580.444	1058.2
537	2652	293	26	Pánuco	Río Comandante 2	Tamaulipas	244.94	Pánuco	6 de Junio de 2018	132.455				686.673	221.22	17.405	0.712	0	18.117	3.719	0	0	0	0	893.495	684.269	209.226	5.30231	Low	Yes							30.1958		30.1958	1	No	0	0	Yes	3	23.2065	38.1764	32.7879	94.1707
538	2653	303	26	Pánuco	Río Mante	Tamaulipas	68.5717	Pánuco	6 de Junio de 2018	19.307				132.032	0	0.966	0.067	0	1.034	0.21	0	0	0	0	131.208	100.484	30.725	2.06668	Low	No									0	0	No	0	0	Yes	1	29.4836	23.2434	0	52.727
539	2654	279	26	Pánuco	Río Guayalejo 3	Tamaulipas	2318.03	Pánuco	6 de Junio de 2018	308.837				252.59	1899.09	485.142	3.168	0	488.311	104.921	0	0	28.501	0.11	1739.68	1211.26	528.419	61.74	High	Yes					23.9909		3.96112		27.952	1	No	0	0	Yes	42	347.238	223.788	428.29	999.317
540	2655	282	26	Pánuco	Arroyo el Cojo	Tamaulipas	401.326	Pánuco	6 de Junio de 2018	5.742				38.479	0	10.863	0.006	0	10.869	2.769	0	0	0	0	30.379	21.151	9.227	72.6101	High	Yes					149.264				149.264	1	No	0	0	Yes	2	6.05243	31.0972	54.3176	91.4673
541	2656	312	26	Pánuco	Río Tantoán	Tamaulipas, San Luis Potosí, Veracruz-Llave	610.433	Pánuco	6 de Junio de 2018	12.882				104.683	0	26.512	0.372	0	26.884	5.702	0	0	0	0	83.501	48.277	35.224	55.8849	High	Yes					13.1776				13.1776	1	No	0	0	Yes	15	90.7353	157.424	102.668	350.827
542	2657	286	26	Pánuco	Río Guayalejo 4	Tamaulipas, San Luis Potosí, Veracruz-Llave	3061.09	Pánuco	6 de Junio de 2018	398.994				377.878	1770.06	521.94	3.16	0	525.1	69.93	0	0	95.386	0.402	1596.97	923.309	673.666	57.883	High	Yes					99.0886		155.215		254.303	1	No	0	0	Yes	44	129.598	416.925	588.916	1135.44
543	2658	305	26	Pánuco	Río Tamesí	Tamaulipas, San Luis Potosí, Veracruz-Llave	1953.54	Pánuco	6 de Junio de 2018	485.777				509.5	1680.48	419.335	18.928	0	438.263	167.598	0	0	421.68	0	1497.63	503.115	994.516	58.0928	High	Yes							12.2281		12.2281	1	No	0	0	Yes	36	327.336	392.505	191.12	910.962
544	2659	320	26	Pánuco	Río Moctezuma 5	San Luis Potosí, Veracruz-Llave, San Luis Potosí	1282.15	Pánuco	6 de Junio de 2018	3305.72				154.247	12750.9	896.223	9.832	0	906.055	23.361	0	97.908	0	0	11924.6	4817.77	7106.78	9.64189	Low	Yes					32.6142		0.304854		32.9191	1	No	0	0	Yes	21	143.895	96.5608	308.673	549.129
545	2660	352	26	Pánuco	Río Chicayán 1	Veracruz-Llave	1889.78	Pánuco	6 de Junio de 2018	58.594				315.676	0	3.969	0	0	3.969	2.215	0	37.223	52.268	-0.589	225.019	96.484	128.536	49.6291	High	Yes							43.6642		43.6642	1	No	0	0	Yes	38	45.3858	396.932	494.292	936.61
546	2661	330	26	Pánuco	Río Chicayán 2	Veracruz-Llave	1549.46	Pánuco	6 de Junio de 2018	144.39				254.675	225.019	71.384	3.01	0	74.394	15.214	37.223	0	0	0	457.737	153.772	303.965	16.5927	Medium	No									0	0	No	0	0	Yes	29	94.9939	390.249	267.168	752.411
547	2662	321	26	Pánuco	Río Pánuco 1	San Luis Potosí, Veracruz-Llave	1457.47	Pánuco	6 de Junio de 2018	3444.52				215.388	11924.6	349.49	4.813	0	354.304	72.837	97.908	788.4	119.413	0	11048.6	3711.66	7336.91	11.7064	Medium	No									0	0	No	0	0	Yes	30	147.513	322.009	230.183	699.706
548	2663	323	26	Pánuco	Arroyo Tamacuil o La Llave	Veracruz-Llave	1084.74	Pánuco	6 de Junio de 2018	50.283				190.257	0	3.011	0	0	3.011	0.685	0	0	0	0	187.93	63.133	124.797	1.71979	Low	No									0	0	Yes	7.45414	1	Yes	22	200.23	170.526	200.859	571.615
549	2664	315	26	Pánuco	Río Pánuco 2	Tamaulipas, Veracruz-Llave	955.706	Pánuco	6 de Junio de 2018	4182				199.975	13191.9	100.534	2.567	0	103.101	35.098	0	0	225.552	0	13098.3	4182	8916.29	2.50913	Low	Yes							0.662458		0.662458	1	No	0	0	Yes	30	305.32	309.013	99.6375	713.971
550	2665	497	26	Pánuco	Xochimilco	Ciudad de México, Morelos	506.813							47.001	0	7.512	0	0	7.512	110.008	0	0	0.604	0	148.892	148.809	0.083	9778.31	Very high	Yes	1.35343			8.05			65.24		74.6434	1	Yes	25.8582	1	Yes	9	94.3397	80.2407	38.4869	213.067
551	2666	487	26	Pánuco	Río La Compañía	Estado de México, Puebla, Ciudad de México	1154.19							69.496	0	5.931	0	0	5.931	97.15	0	0	0	0	160.714	160.624	0.09	6590	Very high	Yes				99.2172			186.565	2.98719	288.77	1	Yes	0.0694761	1	Yes	12	144.357	0	158.596	302.953
552	2667	455	26	Pánuco	Tochac-Tecocomulco	Hidalgo, Tlaxcala, Estado de México, Puebla,	1309.67							82.156	0	8.835	0	0	8.835	6.377	0	0	37.277	0	42.421	42.399	0.022	209600	Very high	Yes				0.668834			43.313	12.8781	56.8599	1	Yes	35.3766	1	Yes	2	0	0	39.5935	39.5935
553	2668	444	26	Pánuco	Río de Las Avenidas de Pachuca	Hidalgo, Estado de México, Tlaxcala	2628.5							119.524	42.421	14.893	0	0	14.893	71.213	0	0	0	0	218.265	218.143	0.122	12207.4	Very high	Yes				2.96049			29.9962	0.0742934	33.031	1	No	0	0	Yes	0	5.93435	0	14.2757	20.21
554	2669	468	26	Pánuco	Texcoco	Estado de México, Tlaxcala, Hidalgo	1386.53							85.771	0	12.553	0.114	0	12.666	43.264	0	0	12.871	0	103.498	103.44	0.058	44029.3	Very high	Yes				30			128.698		158.698	1	No	0	0	Yes	13	183.033	12.5671	125.005	320.605
555	2670	731	26	Pánuco	Ciudad de México	Ciudad de México, Estado de México	1804.21							221.636	631.369	621.272	1.492	0	622.764	964.183	440.179	1167.98	27.521	0	439.102	437.841	1.262	144078	Very high	Yes				43.8808			282.163		326.044	1	No	0	0	Yes	17	133.091	83.2419	224.349	440.682
556	2671	465	26	Pánuco	Río Cuautitlán	Estado de México, Hidalgo	821.725							89.987	0	94.722	0	0	94.722	153.372	5.198	0	4.759	0	149.075	148.911	0.165	60291.5	Very high	Yes							308.548		308.548	1	No	0	0	Yes	14	25.0009	169.176	162.062	356.239
557	2672	459	26	Pánuco	Presa Requena	Hidalgo, Estado de México	754.898							159.747	0	37.789	0.052	0	37.841	11.603	0	81.923	9.619	0	41.967	41.921	0.046	281267	Very high	Yes							267.792		267.792	1	No	0	0	Yes	17	1.1121	234.639	220.861	456.613
558	2673	447	26	Pánuco	Presa Endhó	Hidalgo, Estado de México	1342.89							102.79	191.042	141.109	0	0	141.109	40.417	1136.96	1054.41	16.413	-0.159	259.438	257.813	1.625	74570.5	Very high	Yes				1.05769			65.3597		66.4174	1	No	0	0	Yes	14	66.6555	2.18142	228.182	297.019
559	2674	443	26	Pánuco	Río Salado	Hidalgo, Estado de México	656.472							47.451	439.102	311.259	177.406	0	488.665	286.943	201.823	39.23	0	0	447.424	444.622	2.802	18839.9	Very high	Yes							3.88144		3.88144	1	No	0	0	Yes	3	3.14357	0	74.9972	78.1407
560	2675	411	26	Pánuco	Río Actopan	Hidalgo	1289.65							36.108	0	9.114	375.429	0	384.543	80.802	326.019	15.258	0	0	43.128	42.858	0.27	148074	Very high	Yes				2.08065			2.20271		4.28336	1	No	0	0	Yes	0	0	0	18.7433	18.7433
561	2676	418	26	Pánuco	Río Alfajayucan	Hidalgo, Estado de México	834.978							38.453	0	14.427	115.235	0	129.662	26.018	160.567	8.921	9.358	-0.65	77.748	76.81	0.938	15702.7	Very high	Yes							11.837		11.837	1	No	0	0	Yes	3	6.45696	2.12364	61.7979	70.3785
562	2677	412	26	Pánuco	Río Tula	Hidalgo, Estado de México	1454.33							55.106	749.99	601.456	57.634	0	659.09	321.825	491.407	118.882	0	0	840.356	830.22	10.136	7675.34	Very high	Yes							7.75449		7.75449	1	No	0	0	Yes	11	94.3978	16.6945	150.021	261.114
563	2701	329	27	Norte de Veracruz	Río Cucharas	Veracruz-Llave	721.375							209.55	0	1.897	0	0	1.897	1.296	0	0	0	0	208.949	0	208.949	0.907877	Low	Yes							24.72		24.72	1	No	0	0	Yes	16	15.0196	88.6042	290.38	394.004
564	2702	355	27	Norte de Veracruz	Río Tancochín	Veracruz-Llave	632.824							156.644	0	4.906	0	0	4.906	3.18	0	0	0	0	154.918	0	154.918	3.16684	Low	Yes							27.6333		27.6333	1	Yes	8.62234	1	Yes	17	70.1112	148.838	205.284	424.233
565	2703	359	27	Norte de Veracruz	Arroyo La Piedra o La Laja	Veracruz-Llave	318.149							59.117	0	0.317	0	0	0.317	0.122	0	0	0	0	58.921	0	58.921	0.538009	Low	No									0	0	Yes	2.72923	1	Yes	3	23.4956	13.3077	48.6256	85.4289
566	2704	366	27	Norte de Veracruz	Arroyo Carbajal	Veracruz-Llave	188.519							43.142	0	0.751	0	0	0.751	0.206	0	0	0	0	42.597	0	42.597	1.76303	Low	No									0	0	No	0	0	Yes	6	1.47686	53.8765	94.247	149.6
567	2705	371	27	Norte de Veracruz	Estero Galindo	Veracruz-Llave	1011.81							260.608	0	0.849	0.017	0	0.866	0.645	0	0	0	0	260.387	0	260.387	0.332582	Low	No									0	0	Yes	70.5449	1	Yes	17	160.731	70.4343	171.528	402.693
568	2706	376	27	Norte de Veracruz	Río Tuxpan	Hidalgo, Veracruz-Llave, Puebla	5843.21							2068.74	0	38.232	1.603	0	39.836	20.649	0	0	0	0	2049.56	0	2049.56	1.94364	Low	Yes							55.904		55.904	1	Yes	29.0776	1	Yes	110	296.489	527.965	1911.41	2735.87
569	2707	402	27	Norte de Veracruz	Río Cazones	Hidalgo, Veracruz-Llave, Puebla	2824.82							2077.14	0	77.455	0.286	0	77.741	50.57	0	165.028	0	0	1884.94	0	1884.94	12.8794	Medium	Yes		110.516						0.0655767	110.582	1	Yes	7.6802	1	Yes	60	266.57	126.9	1101.07	1494.54
570	2708	421	27	Norte de Veracruz	Río Tecolutla	Puebla, Hidalgo, Veracruz-Llave, Tlaxcala	7708.68				24 de junio de 2011			6181.09	0	2492.88	2.207	0.28	2495.36	2393.34	165.028	0	0	0	6244.1	0	6244.1	39.9635	Medium	Yes		307.831						22.2828	330.114	1	Yes	5.19672	1	Yes	177	347.617	1034.63	3049.16	4431.41
571	2709	431	27	Norte de Veracruz	Río Nautla	Puebla, Veracruz-Llave	2933.35				24 de junio de 2011			2413.31	0	697.057	0.749	0.364	698.17	659.312	0	0	0	0	2374.45	0	2374.45	29.4034	Medium	Yes				39.4985			118.774		158.273	1	No	0	0	Yes	73	228.889	350.897	1226.1	1805.88
572	2710	438	27	Norte de Veracruz	Río Misantla	Veracruz-Llave	571.792							667.711	0	4.974	0	0	4.974	3.556	0	0	0	0	666.293	0	666.293	0.746518	Low	Yes							0.641714		0.641714	1	No	0	0	Yes	13	43.8308	86.7156	187.748	318.294
573	2711	441	27	Norte de Veracruz	Río Colipa	Veracruz-Llave	462.899							330.485	0	3.581	0	0	3.581	1.948	0	0	0	0	328.853	0	328.853	1.08894	Low	No									0	0	No	0	0	Yes	7	59.3084	38.1984	64.4753	161.982
574	2712	394	27	Norte de Veracruz	Llanuras de Tuxpan	Puebla, Veracruz-Llave	1613.96							553.16	0	6.917	0.558	0	7.475	1.781	0	0	0	0	547.466	0	547.466	1.36538	Low	Yes							27.5133		27.5133	1	Yes	6.13747	1	Yes	37	41.8414	419.887	460.148	921.876
575	2801	512	28	Papaloapan	Río Salado	Veracruz-Llave, Puebla, Oaxaca	6598.24	Papaloapan	6 de Junio de 2018	85.67	6 de Junio de 2018	50.844		422.222	0	111.917	0	50.494	162.41	26.828	137.396	0	0	0	424.035	383.704	40.332	128.895	Very high	Yes				31.1916	3152.51		332.189		3515.89	1	No	0	0	Yes	109	910.204	308.905	1457.29	2676.4
576	2802	561	28	Papaloapan	Río Grande	Oaxaca	4918.52	Papaloapan	6 de Junio de 2018	276.83				896.041	0	53.533	0.351	0	53.884	16.314	0	0	0	0	858.471	776.819	81.652	15.0312	Medium	Yes					1412.07		0.200753	9.5564	1421.83	1	No	0	0	Yes	114	627.875	926.514	1315.33	2869.72
577	2803	562	28	Papaloapan	Río Trinidad	Oaxaca, Veracruz-Llave	5344.86	Papaloapan	6 de Junio de 2018	3911.04	6 de Junio de 2018	10.088		6327.6	0	7.805	0.003	1.063	8.871	4.173	0	0	0	0	6322.9	4840.01	1482.89	0.164463	Low	Yes							12.98		12.98	1	No	0	0	Yes	132	484.074	757.986	2010.63	3252.69
578	2804	551	28	Papaloapan	Río Valle Nacional	Oaxaca	1414.86	Papaloapan	6 de Junio de 2018	2449.23	6 de Junio de 2018	0.8		3807.85	0	9.314	0	0.794	10.107	2.523	0	0	0	0	3800.26	2839.07	961.198	0.296356	Low	Yes								167.202	167.202	1	No	0	0	Yes	38	494.087	112.155	287.247	893.489
579	2805	547	28	Papaloapan	Río Playa Vicente	Oaxaca, Veracruz-Llave	4673.6	Papaloapan	6 de Junio de 2018	4406.38	6 de Junio de 2018	4.082		6121.8	0	7.352	0.023	3.955	11.33	4.55	0	0	0	0	6115.02	4562.18	1552.84	0.190126	Low	Yes								104.056	104.056	1	No	0	0	Yes	106	407.904	652.344	1567.32	2627.57
580	2806	540	28	Papaloapan	Río Santo Domingo	Oaxaca	2531.41	Papaloapan	6 de Junio de 2018	2426.92	6 de Junio de 2018	3.087		4786.78	1282.51	1030.54	0	3.087	1033.63	1028.71	0	3271.35	101.851	21.975	2669.18	1994.07	675.115	142.771	Very high	Yes					23.9281			246.781	270.709	1	No	0	0	Yes	40	320.513	142.216	577.719	1040.45
581	2807	498	28	Papaloapan	Río Tonto	Oaxaca, Puebla, Veracruz-Llave	4813.46	Papaloapan	6 de Junio de 2018	3659.49	6 de Junio de 2018	20.642		8808.13	0	15441.8	72.349	20.642	15534.8	15288.5	3271.35	0	336.4	27.147	11469.6	8568.61	2901	242.335	Very high	Yes							1.11684	28.6841	29.8009	1	No	0	0	Yes	65	361.707	73.4352	1208.97	1644.12
582	2808	500	28	Papaloapan	Río Blanco	Veracruz-Llave, Puebla	2922.48	Papaloapan	6 de Junio de 2018	1378.25	6 de Junio de 2018	38.636		2664.16	0	1486.93	0.813	36.022	1523.77	1358.03	0	186.801	0	0	2311.62	1723.21	588.408	86.9785	Very high	Yes				514.682			311.253		825.935	1	Yes	366.361	1	Yes	60	272.417	247.619	950.661	1470.7
583	2809	517	28	Papaloapan	Río San Juan	Veracruz-Llave	4542.41	Papaloapan	6 de Junio de 2018	5943.29	6 de Junio de 2018	9.846		2345.86	6322.9	654.655	0.372	8.187	663.213	614.112	0	0	66.763	0	8552.9	6375.81	2177.09	8.98944	Low	Yes					257.037		0.00836141		257.045	1	Yes	121.016	1	Yes	92	457.756	215.992	1667.95	2341.7
584	2810	523	28	Papaloapan	Río Tesechoacán	Veracruz-Llave	1147.03	Papaloapan	6 de Junio de 2018	4856.92	6 de Junio de 2018	3.414		460.795	6115.02	12.229	0	3.414	15.643	7.155	0	0	0	0	6567.32	4895.65	1671.67	0.239608	Low	No									0	0	Yes	49.2599	1	Yes	28	14.26	21.0488	593.384	628.693
585	2811	524	28	Papaloapan	Río Papaloapan	Veracruz-Llave, Oaxaca	2261.37	Papaloapan	6 de Junio de 2018	12802.4				1293.69	17939.1	121.56	0.75	0	122.31	53.217	0	0	0	0	19163.7	14285.7	4877.99	0.691782	Low	Yes								28.6687	28.6687	1	Yes	61.0567	1	Yes	29	82.169	0	740.608	822.777
586	2812	502	28	Papaloapan	Llanuras de Papaloapan	Oaxaca, Veracruz-Llave	6420.84	Papaloapan	6 de Junio de 2018	29826.6	6 de Junio de 2018	0.664		4064.73	36595.5	491.776	0.495	0.664	492.935	109.399	186.801	0	211.679	0	40251.8	29826.6	10425.2	1.75051	Low	Yes					1074.33				1074.33	1	Yes	2122.21	1	Yes	139	745.504	583.095	2039.33	3367.92
587	2813	467	28	Papaloapan	Río Actopan	Veracruz-Llave	1996.97	Actopan-Antigua	6 de Junio de 2018	256	6 de Junio de 2018	45.6	17 de Mayo 2022	834.655	0	425.316	0	45.6	470.916	117.01	120.722	0	0	0	601.472	256	345.472	136.311	Very high	Yes							28.3703		28.3703	1	No	0	0	Yes	27	104.88	71.8011	476.148	652.829
588	2814	477	28	Papaloapan	Río La Antigua	Veracruz-Llave, Puebla	3477.99	Actopan-Antigua	6 de Junio de 2018	988.51	6 de Junio de 2018	51.33	17 de Mayo 2022	2152.78	0	356.04	0.198	51.214	407.452	120.073	0	120.722	0	0	1744.68	988.51	756.174	69.8482	High	Yes				42.7991			53.6549	0.0553515	96.5093	1	Yes	7.16044	1	Yes	57	204.071	250.591	979.814	1434.48
589	2815	489	28	Papaloapan	Río Jamapa	Veracruz-Llave, Puebla	1987.13	Papaloapan	6 de Junio de 2018	189.93				588.912	0	178.302	0.046	0	178.347	107.595	0	0	0	0	518.16	380.657	137.503	54.4682	High	Yes				42.499			1.3481		43.8471	1	No	0	0	Yes	37	107.596	154.446	711.643	973.685
590	2816	495	28	Papaloapan	Río Cotaxtla	Veracruz-Llave, Puebla	1643.76	Papaloapan	6 de Junio de 2018	818.28	6 de Junio de 2018	11.404		1458.11	0	386.377	0.738	9.039	396.154	158.661	0	0	0	0	1220.61	896.702	323.912	34.6837	Medium	Yes				13.2853			4.87698	4.48967	22.652	1	No	0	0	Yes	31	87.0105	186.921	482.617	756.548
591	2817	493	28	Papaloapan	Jamapa-Cotaxtla	Veracruz-Llave, Puebla	307.925	Papaloapan	6 de Junio de 2018	1250	6 de Junio de 2018	1.079		125.729	1738.77	414.154	0	1.079	415.233	402.257	0	0	0	0	1851.53	1250	601.526	22.4265	Medium	Yes				0.267415			7.25373		7.52114	1	Yes	0.354319	1	Yes	4	70.5561	0	21.697	92.2531
592	2818	452	28	Papaloapan	Llanuras de Actopan	Veracruz-Llave	1250.19	Papaloapan	6 de Junio de 2018	105.6				261.05	0	6.615	0	0	6.615	3.109	0	0	0	0	257.544	105.6	151.944	2.56849	Low	Yes							14.2176		14.2176	1	Yes	14.0218	1	Yes	21	141.93	122.749	287.223	551.902
593	2901	553	29	Coatzacoalcos	Zanapa	Tabasco	425.231							286.815	0	2.83	0	0	2.83	0.751	0	0	0	0	284.737	1.978	282.759	1.00085	Low	No									0	0	No	0	0	Yes	11	48.0936	57.2651	169.015	274.373
594	2902	560	29	Coatzacoalcos	Tancochapa Alto	Veracruz-Llave, Tabasco	1180.57							947.35	0	0.825	0	0	0.825	0.555	0	0	0	0	947.08	0.55	946.53	0.0871605	Low	No									0	0	No	0	0	Yes	17	55.9793	124.443	260.635	441.057
595	2903	564	29	Coatzacoalcos	Poza Crispín	Tabasco, Veracruz-Llave, Chiapas	1047.27							893.951	0	0.255	0	0	0.255	0.191	0	0	0	0	893.887	0.519	893.368	0.0285437	Low	No									0	0	No	0	0	Yes	20	1.89176	179.601	314.238	495.732
596	2904	539	29	Coatzacoalcos	Coacajapa	Tabasco	926.476							570.57	284.737	5.491	0	0	5.491	2.173	0	0	0	0	851.989	0.466	851.522	0.644845	Low	Yes							2.8091		2.8091	1	No	0	0	Yes	9	0.00223027	52.6574	189.673	242.333
597	2905	545	29	Coatzacoalcos	Tancochapa Bajo	Veracruz-Llave, Tabasco	468.466							260.406	1840.97	0.07	0	0	0.07	0.055	0	0	0	0	2101.36	1.151	2100.21	0.003333	Low	No									0	0	No	0	0	Yes	8	39.9293	48.2615	118.5	206.691
598	2906	535	29	Coatzacoalcos	Tonalá	Veracruz-Llave, Tabasco	1655.99							1130.69	2953.35	2.237	0	0	2.237	0.921	0	0	0	0	4082.72	0	4082.72	0.0547918	Low	No									0	0	No	0	0	Yes	27	171.365	215.697	264.105	651.166
599	2907	526	29	Coatzacoalcos	Santa Anita	Tabasco	667.631							481.372	0	7.383	0	0	7.383	2.672	0	0	0	0	476.662	0	476.662	1.5489	Low	No									0	0	No	0	0	Yes	5	34.6401	0	73.6531	108.293
600	2908	528	29	Coatzacoalcos	Laguna del Carmen	Tabasco	985.973							898.612	0	19.9	0	0	19.9	17.281	0	0	0	0	895.994	0	895.994	2.221	Low	No									0	0	No	0	0	Yes	16	150.368	73.0404	179.954	403.363
601	2909	522	29	Coatzacoalcos	Laguna Machona	Tabasco	796.059							542.397	0	3	0	0	3	2.383	0	0	0	0	541.779	0	541.779	0.553731	Low	No									0	0	No	0	0	Yes	7	110.174	74.9983	22.573	207.745
602	2910	579	29	Coatzacoalcos	Alto Río Coatzacoalcos	Oaxaca, Veracruz-Llave	10652.5	Coatzacoalcos	23 de Marzo de 2018	8356.61	23 de Marzo de 2018	6.292		14622.8	0	8.82	0.069	5.236	14.126	6.075	0	0	0	0	14614.8	8388.63	6226.15	0.0968678	Low	Yes							7.41746	202.23	209.648	1	No	0	0	Yes	241	1703.18	1785.82	2552.3	6041.31
603	2911	549	29	Coatzacoalcos	Bajo Río Coatzacoalcos	Veracruz-Llave, Oaxaca	3719.2	Coatzacoalcos	23 de Marzo de 2018	6850.14	23 de Marzo de 2018	5.353		1766.12	14614.8	14.1	0	5.353	19.453	7.646	0	0	0	0	16369.1	9387.28	6981.8	0.140638	Low	No									0	0	No	0	0	Yes	34	25.001	25.001	813.193	863.195
604	2912	569	29	Coatzacoalcos	Alto Río Uxpanapa	Veracruz-Llave, Oaxaca, Chiapas	3315.56	Coatzacoalcos	23 de Marzo de 2018	3849.98				9031.73	0	1.036	0	0	1.036	0.776	0	0	0	0	9031.47	5205.6	3825.87	0.0134969	Low	Yes							105.857		105.857	1	No	0	0	Yes	46	210.033	340.002	589.163	1139.2
605	2913	541	29	Coatzacoalcos	Bajo Río Uxpanapa	Veracruz-Llave	1938.31	Coatzacoalcos	23 de Marzo de 2018	4599.12	23 de Marzo de 2018	0.116		1840.63	9031.47	40.181	0	0.116	40.297	22.212	0	33.981	0	0	10820	6205.03	4615	0.806132	Low	Yes								3.64856	3.64856	1	No	0	0	Yes	22	6.28592	74.7541	470.636	551.676
606	2914	531	29	Coatzacoalcos	Río Huazuntlán	Veracruz-Llave	1635.34	Coatzacoalcos	23 de Marzo de 2018	15419.2	23 de Marzo de 2018	23.107		1210.78	27189.1	145.185	20.613	19.932	185.73	92.387	33.981	11.826	0	0	28328.7	16161.6	12167.1	0.716137	Low	Yes					158.876			12.8269	171.703	1	No	0	0	Yes	23	12.565	74.9382	547.081	634.584
607	2915	532	29	Coatzacoalcos	Llanuras de Coatzacoalcos	Veracruz-Llave	301.866	Coatzacoalcos	23 de Marzo de 2018	16290	23 de Marzo de 2018	3.119		238.998	28328.7	18.842	0	3.119	21.961	12.756	11.826	0	0	0	28570.3	16290	12280.3	0.0768664	Low	Yes					55.4414				55.4414	1	No	0	0	Yes	8	31.6068	61.4012	84.4457	177.454
610	3001	676	30	Grijalva-Usumacinta	Lagartero	Chiapas	534.956	Grijalva-Usumacinta	6 de Junio de 2018	24.98				158.807	0	4.417	0	0	4.417	1.579	0	0	0	0	155.969	155.949	0.02	17.668	Medium	Yes				0.835799					0.835799	1	Yes	0.294028	1	Yes	2	3.49058	0	60.5801	64.0707
611	3002	704	30	Grijalva-Usumacinta	Yayahuita	Chiapas	966.96	Grijalva-Usumacinta	6 de Junio de 2018	88.31	6 de Junio de 2018	1.507		459.421	0	4.881	0	1.507	6.388	1.924	0	0	0	0	454.957	454.898	0.06	7.2287	Low	Yes					277.985		169.521		447.506	1	No	0	0	Yes	17	15.3935	73.1487	304.532	393.075
612	3003	756	30	Grijalva-Usumacinta	Zacualpa	Chiapas	587.575	Grijalva-Usumacinta	6 de Junio de 2018	60.86				236.143	0	4.846	0	0	4.846	2.79	0	0	0	0	234.087	234.056	0.031	7.95848	Low	Yes							192.544		192.544	1	No	0	0	Yes	6	21.8651	0.00028856	129.531	151.396
613	3004	710	30	Grijalva-Usumacinta	Papizaca	Chiapas	238.472	Grijalva-Usumacinta	6 de Junio de 2018	18.32				87.014	0	4.136	0	0	4.136	2.286	0	0	0	0	85.164	85.153	0.011	22.5629	Medium	No									0	0	No	0	0	Yes	4	0	0	81.9669	81.9669
614	3005	692	30	Grijalva-Usumacinta	Presa La Concordia	Chiapas	608.085	Grijalva-Usumacinta	6 de Junio de 2018	67.64	6 de Junio de 2018	0.752		316.576	0	1.804	0.682	0.752	3.238	0.516	0	0	0	0	313.854	313.82	0.034	4.7847	Low	Yes		276.315			215.558			5.22433	497.098	1	No	0	0	Yes	11	0.717685	26.1894	224.037	250.944
615	3006	690	30	Grijalva-Usumacinta	Selegua	Chiapas	811.432	Grijalva-Usumacinta	6 de Junio de 2018	530.44	6 de Junio de 2018	3.187		262.071	1526.54	89.896	0.179	3.187	93.262	18.99	0	0	0	0	1714.34	1714.12	0.227	17.5745	Medium	No									0	0	No	0	0	Yes	11	17.8978	0	246.082	263.979
616	3007	697	30	Grijalva-Usumacinta	San Miguel	Chiapas	1032.12	Grijalva-Usumacinta	6 de Junio de 2018	1277.6	6 de Junio de 2018	5.469		313.397	2987.13	14.395	0	5.38	19.774	8.754	0	0	0	0	3289.51	3289.07	0.435	1.54722	Low	No									0	0	No	0	0	Yes	11	40.8501	25.0008	223.185	289.036
617	3008	680	30	Grijalva-Usumacinta	La Concordia	Chiapas	360.057	Grijalva-Usumacinta	6 de Junio de 2018	121.36	6 de Junio de 2018	1.259		167.92	313.854	87.889	0	1.259	89.148	17.766	0	0	0	0	410.392	410.338	0.054	73.4248	High	Yes							12.1985		12.1985	1	No	0	0	Yes	4	0	9.3124	113.269	122.581
618	3009	641	30	Grijalva-Usumacinta	Aguacatenco	Chiapas	2249.91	Grijalva-Usumacinta	6 de Junio de 2018	155.51	6 de Junio de 2018	9.447		512.855	0	171.892	0.653	9.426	181.971	40.269	0	0	0	0	371.153	371.104	0.049	116.979	Very high	Yes							2.95403		2.95403	1	No	0	0	Yes	6	25.0199	0	130.667	155.687
619	3010	691	30	Grijalva-Usumacinta	Aguzarca	Chiapas	576.804	Grijalva-Usumacinta	6 de Junio de 2018	66.58	6 de Junio de 2018	0.301		348.6	0	0.435	0	0.301	0.736	0.16	0	0	0	0	348.024	347.978	0.046	1.10467	Low	No									0	0	No	0	0	Yes	10	0	50.0021	208.474	258.476
620	3011	672	30	Grijalva-Usumacinta	San Pedro	Chiapas	1050.97	Grijalva-Usumacinta	6 de Junio de 2018	229.3	6 de Junio de 2018	2.337		367.057	0	13.215	0.706	2.337	16.258	3.673	0	0	0	0	354.471	354.425	0.047	7.08882	Low	Yes		500.782			38.7157				539.497	1	No	0	0	Yes	25	0	104.017	546.13	650.147
621	3012	687	30	Grijalva-Usumacinta	Grande o Salinas	Chiapas	738.921	Grijalva-Usumacinta	6 de Junio de 2018	130.19	6 de Junio de 2018	1.978		543.714	0	6.02	0.068	1.978	8.067	5.452	0	0	0	0	541.099	541.028	0.072	6.1929	Low	Yes					96.9187		95.7157		192.634	1	No	0	0	Yes	19	0	125.494	343.411	468.905
622	3013	663	30	Grijalva-Usumacinta	Presa La Angostura	Chiapas	3267.48	Grijalva-Usumacinta	6 de Junio de 2018	3673.29	6 de Junio de 2018	3.493		5073.84	7028.99	9451.4	0.016	3.493	9454.91	50.218	0	0	837.552	0	1860.59	1858.98	1.607	280.075	Very high	Yes		207.07			53.5536		57.7183		318.342	1	No	0	0	Yes	39	198.199	76.9737	667.3	942.472
623	3014	612	30	Grijalva-Usumacinta	Hondo	Chiapas	489.442	Grijalva-Usumacinta	6 de Junio de 2018	36.06	6 de Junio de 2018	5.094		120.669	0	6.795	0	5.078	11.873	3.383	0	0	0	0	112.179	112.082	0.097	32.8373	Medium	Yes				9.87684					9.87684	1	Yes	9.62348	1	Yes	7	6.40192	12.9746	151.745	171.122
624	3015	619	30	Grijalva-Usumacinta	Tuxtla Gutiérrez	Chiapas	382.081	Grijalva-Usumacinta	6 de Junio de 2018	16.57	6 de Junio de 2018	100.656		66.249	0	5.223	0	100.478	105.701	3.244	0	0	0	0	-36.208	0	-36.208	0	Very high	Yes				38.9311			5.20158		44.1327	1	Yes	18.1313	1	Yes	4	27.2126	0	82.8863	110.099
625	3016	636	30	Grijalva-Usumacinta	Suchiapa	Chiapas	2041.02	Grijalva-Usumacinta	6 de Junio de 2018	109.26	6 de Junio de 2018	6.446		392.347	0	24.164	0.052	6.446	30.662	6.913	0	0	0	0	368.599	368.28	0.318	27.9819	Medium	Yes		200.697			400.671		3.49067	0.281077	605.139	1	No	0	0	Yes	26	7.07286	150.059	473.655	630.787
626	3017	642	30	Grijalva-Usumacinta	Santo Domingo	Chiapas	2061.68	Grijalva-Usumacinta	6 de Junio de 2018	159.57	6 de Junio de 2018	9.105		492.219	0	23.841	0.552	9.105	33.498	6.976	0	0	0	0	465.698	465.296	0.402	20.9399	Medium	Yes		599.224			278.391			0.0711625	877.686	1	No	0	0	Yes	21	1.3425	13.9538	540.28	555.577
627	3018	614	30	Grijalva-Usumacinta	Presa Chicoasén	Chiapas	2616.96	Grijalva-Usumacinta	6 de Junio de 2018	5350.79				1035.9	2807.06	12301.4	0.653	0	12302.1	10341.5	0	0	31.736	0	1850.64	1838.39	12.249	229.978	Very high	Yes				184.464			33.0131		217.477	1	Yes	192.09	1	Yes	35	207.036	137.032	551.375	895.443
628	3019	592	30	Grijalva-Usumacinta	Chicoasén	Chiapas	956.155	Grijalva-Usumacinta	6 de Junio de 2018	102.34	6 de Junio de 2018	6.935		397.099	0	5.66	0.111	6.907	12.679	3.932	0	0	0	0	388.352	385.782	2.57	12.0856	Medium	Yes				0.466794					0.466794	1	Yes	0.490948	1	Yes	14	74.5846	11.0601	281.238	366.883
629	3020	615	30	Grijalva-Usumacinta	Encajonado	Chiapas, Oaxaca	1715.06	Grijalva-Usumacinta	6 de Junio de 2018	44.1	6 de Junio de 2018	0.162		304.595	0	0.725	0	0.162	0.887	0.304	0	0	0	0	304.013	300.434	3.579	1.86036	Low	Yes					76.8658			55.883	132.749	1	No	0	0	Yes	47	227.173	412.756	523.071	1163
630	3021	634	30	Grijalva-Usumacinta	Cintalapa	Chiapas, Oaxaca	1298.2	Grijalva-Usumacinta	6 de Junio de 2018	30.28	6 de Junio de 2018	5.48		176.638	0	16.185	0.521	5.465	22.17	4.257	0	0	0	0	158.725	156.856	1.868	68.9623	High	Yes					139.019				139.019	1	No	0	0	Yes	15	46.9322	81.1394	251.651	379.723
631	3022	648	30	Grijalva-Usumacinta	Soyatenco	Chiapas	1037.62	Grijalva-Usumacinta	6 de Junio de 2018	54.71	6 de Junio de 2018	0.534		184.861	0	5.256	0	0.534	5.79	1.26	0	0	0	0	180.331	178.208	2.123	10.1877	Medium	Yes					159.542			0.231987	159.774	1	No	0	0	Yes	15	32.4925	47.8048	300.67	380.967
632	3023	598	30	Grijalva-Usumacinta	Alto Grijalva	Chiapas	302.622	Grijalva-Usumacinta	6 de Junio de 2018	4690.96	6 de Junio de 2018	0.651		92.353	2238.99	10945.7	0.05	0.651	10946.4	22210.6	0	0	0	0	13595.6	13433.1	162.438	225.54	Very high	No									0	0	No	0	0	Yes	2	0	0.460059	53.7543	54.2144
633	3024	608	30	Grijalva-Usumacinta	De La Venta	Chiapas	1367.69	Grijalva-Usumacinta	6 de Junio de 2018	270.03	6 de Junio de 2018	7.413		317.96	643.068	6.737	0.032	7.413	14.182	1.741	0	0	0	0	948.588	937.254	11.334	5.04045	Low	Yes					419.073		11.9054	40.6673	471.646	1	No	0	0	Yes	14	54.8807	140.326	146.426	341.633
634	3025	594	30	Grijalva-Usumacinta	Chapopote	Chiapas, Veracruz-Llave, Oaxaca	599.376	Grijalva-Usumacinta	6 de Junio de 2018	41.96				174.466	0	9.513	0.319	0	9.832	5.249	0	0	0	0	169.884	167.854	2.03	22.3505	Medium	Yes					193.27		80.8514	0.0340461	274.155	1	No	0	0	Yes	6	22.7895	0	110.812	133.602
635	3026	610	30	Grijalva-Usumacinta	Presa Nezahualcóyotl	Chiapas	1818.25	Grijalva-Usumacinta	6 de Junio de 2018	5441.63	6 de Junio de 2018	1.157		6236.24	14714	16717.9	0.044	1.104	16719.1	3.266	0	0	327.872	0	3906.58	3656.22	250.351	299.491	Very high	Yes					326.492				326.492	1	No	0	0	Yes	28	143.99	34.4177	562.343	740.75
636	3027	588	30	Grijalva-Usumacinta	Tzimbac	Chiapas	251.479	Grijalva-Usumacinta	6 de Junio de 2018	128.57	6 de Junio de 2018	0.54		458.965	0	20.093	0	0.54	20.633	19.761	0	0	0	0	458.093	428.736	29.357	13.0649	Medium	Yes							0.962214		0.962214	1	No	0	0	Yes	4	0	10.5425	91.4274	101.97
637	3028	581	30	Grijalva-Usumacinta	Zayula	Chiapas	430.714	Grijalva-Usumacinta	6 de Junio de 2018	184.1				740.275	0	399.282	0.008	0	399.29	398.858	0	0	0	0	739.843	692.431	47.412	172.471	Very high	Yes							0.0546816		0.0546816	1	No	0	0	Yes	5	0	56.4274	86.7309	143.158
638	3029	578	30	Grijalva-Usumacinta	Presa Peñitas	Chiapas, Tabasco, Veracruz-Llave	578.369	Grijalva-Usumacinta	6 de Junio de 2018	6231.93				2080.68	5104.51	19548.7	0	0	19548.7	16714.5	0	0	54.543	0	4296.46	2764.86	1531.6	252.504	Very high	No									0	0	No	0	0	Yes	9	1.07312	0	190.158	191.231
639	3030	559	30	Grijalva-Usumacinta	Paredón	Tabasco, Chiapas	387.296	Grijalva-Usumacinta	6 de Junio de 2018	220.89	6 de Junio de 2018	0.905		555.583	0	0.689	0	0.905	1.594	0.24	0	0	0	0	554.229	356.658	197.571	0.38092	Low	No									0	0	No	0	0	Yes	8	0.198095	0	186.687	186.885
640	3031	568	30	Grijalva-Usumacinta	Platanar	Chiapas	440.275	Grijalva-Usumacinta	6 de Junio de 2018	286.86	6 de Junio de 2018	0.596		801.601	0	0.39	0	0.596	0.986	0.179	0	0	0	0	800.794	515.328	285.467	0.172279	Low	No									0	0	No	0	0	Yes	12	0	20.6367	300.755	321.392
641	3032	544	30	Grijalva-Usumacinta	Mezcalapa	Tabasco, Chiapas	694.161	Grijalva-Usumacinta	6 de Junio de 2018	9937.97	6 de Junio de 2018	0.747		819.434	5651.48	43.674	0	0.747	44.421	19567.9	0	0	0	0	25994.4	16712.1	9282.31	0.231115	Low	No									0	0	No	0	0	Yes	14	38.4481	0	285.908	324.356
642	3033	520	30	Grijalva-Usumacinta	El Carrizal	Tabasco, Chiapas	1149.78	Grijalva-Usumacinta	6 de Junio de 2018	6753.81	6 de Junio de 2018	19.647		1038.25	12997.2	4.118	0	19.647	23.765	2.628	0	0	0	0	14014.3	12530.9	1483.42	0.288507	Low	Yes					45.3945		10.0035		55.398	1	Yes	45.4066	1	Yes	26	475.722	55.1351	142.953	673.81
643	3034	521	30	Grijalva-Usumacinta	Tabasquillo	Tabasco	231.67	Grijalva-Usumacinta	6 de Junio de 2018	6954.6				288.966	14014.3	0.165	0	0	0.165	0.124	0	0	0	0	14303.3	12789.2	1514.02	0.00194837	Low	Yes					115.746				115.746	1	Yes	115.749	1	Yes	4	65.5343	9.53564	55.7246	130.795
644	3035	533	30	Grijalva-Usumacinta	Cunduacán	Tabasco	377.738	Grijalva-Usumacinta	6 de Junio de 2018	99.97	6 de Junio de 2018	8.184		274.792	0	2.347	0	8.184	10.531	1.732	0	0	0	0	265.993	104.135	161.858	4.02211	Low	No									0	0	No	0	0	Yes	2	8.41104	0	48.3259	56.7369
645	3036	527	30	Grijalva-Usumacinta	Samaría	Tabasco, Chiapas	686.375	Grijalva-Usumacinta	6 de Junio de 2018	5357.34	6 de Junio de 2018	16.054		475.112	13263.2	6.894	0	16.054	22.948	4.627	0	0	0	0	13720	5357.34	8362.66	0.167259	Low	Yes							0.010202		0.010202	1	No	0	0	Yes	13	79.5145	25.001	179.829	284.344
646	3037	519	30	Grijalva-Usumacinta	Caxcuchapa	Tabasco	509.043	Grijalva-Usumacinta	6 de Junio de 2018	134.13	6 de Junio de 2018	13.461		359.186	0	2.852	0	13.461	16.313	1.592	0	0	0	0	344.465	134.13	210.335	4.73575	Low	No									0	0	No	0	0	Yes	3	56.0555	27.9595	29.8031	113.818
647	3038	571	30	Grijalva-Usumacinta	Basca	Chiapas	416.437	Grijalva-Usumacinta	6 de Junio de 2018	106.49	6 de Junio de 2018	0.991		432.744	0	1.214	0.091	0.991	2.296	0.967	0	0	0	0	431.415	385.997	45.418	1.51144	Low	No									0	0	No	0	0	Yes	8	56.2387	25.001	115.75	196.99
648	3039	587	30	Grijalva-Usumacinta	Yashijá	Chiapas	560.844	Grijalva-Usumacinta	6 de Junio de 2018	129.88	6 de Junio de 2018	1.789		286.052	0	1.334	0.158	1.638	3.131	1.119	0	0	0	0	284.041	254.138	29.903	1.95953	Low	Yes	16.9513								16.9513	1	No	0	0	Yes	11	39.0474	0	233.477	272.525
649	3040	583	30	Grijalva-Usumacinta	Shumulá	Chiapas	993.857	Grijalva-Usumacinta	6 de Junio de 2018	293.55	6 de Junio de 2018	10.657		742.014	0	6.9	0.264	10.516	17.68	5.352	0	0	0	0	729.686	652.867	76.819	4.77362	Low	No									0	0	No	0	0	Yes	10	88.6147	2.58779	147.958	239.16
650	3041	567	30	Grijalva-Usumacinta	Puxcatán	Chiapas, Tabasco	683.118	Grijalva-Usumacinta	6 de Junio de 2018	210.18	6 de Junio de 2018	2.961		555.671	0	3.198	0.012	2.961	6.171	2.396	0	0	0	0	551.896	494.051	57.846	2.30239	Low	Yes							16.757		16.757	1	No	0	0	Yes	13	0	31.3938	294.593	325.987
651	3042	593	30	Grijalva-Usumacinta	Chacté	Chiapas	1493.21	Grijalva-Usumacinta	6 de Junio de 2018	436.12	6 de Junio de 2018	13.35		879.178	0	11.425	0.207	13.164	24.797	8.56	0	0	0	0	862.941	772.313	90.629	4.70756	Low	No									0	0	No	0	0	Yes	27	78.7825	11.0016	585.137	674.921
652	3043	600	30	Grijalva-Usumacinta	De los Plátanos	Chiapas	637.34	Grijalva-Usumacinta	6 de Junio de 2018	143.12	6 de Junio de 2018	2.814		298.431	0	8.33	0.392	2.766	11.488	6.381	0	0	0	0	293.324	262.518	30.806	6.60511	Low	No									0	0	No	0	0	Yes	9	49.5841	0	180.588	230.172
653	3044	563	30	Grijalva-Usumacinta	Tulijá	Chiapas, Tabasco	1697.29	Grijalva-Usumacinta	6 de Junio de 2018	1613.91	6 de Junio de 2018	30.33		2204.96	1445.14	5.314	0.067	2.923	8.304	3.598	0	0	0	0	3645.39	3260.74	384.649	0.415499	Low	Yes	8.50456			17.8111					26.3157	1	No	0	0	Yes	14	85.8325	0	327.669	413.501
654	3045	552	30	Grijalva-Usumacinta	Macuxpana	Tabasco, Chiapas	1165.51	Grijalva-Usumacinta	6 de Junio de 2018	795.66	6 de Junio de 2018	6.285		1278.87	551.896	5.433	0.548	6.263	12.245	4.605	0	0	0	0	1823.13	1630.76	192.37	1.23933	Low	Yes							18.6499		18.6499	1	No	0	0	Yes	10	25.001	4.29415	215.035	244.33
655	3046	575	30	Grijalva-Usumacinta	Almendro	Chiapas, Tabasco	1045	Grijalva-Usumacinta	6 de Junio de 2018	1044.83	6 de Junio de 2018	6.879		876.492	1156.27	6.71	0.198	6.822	13.73	5.186	0	0	0	0	2024.21	1810.18	214.031	1.09067	Low	Yes							10.9527		10.9527	1	No	0	0	Yes	23	59.5617	7.33301	499.402	566.297
656	3047	530	30	Grijalva-Usumacinta	Chilapa	Chiapas, Tabasco	2238.82	Grijalva-Usumacinta	6 de Junio de 2018	5103.28	6 de Junio de 2018	0.19		2790.34	5468.52	26.016	0	0.19	26.206	12.025	0	0	0	0	8244.69	7371.97	872.714	0.438521	Low	Yes					663.17		3.40213		666.572	1	Yes	665.245	1	Yes	39	234.442	154.585	587.112	976.139
657	3048	555	30	Grijalva-Usumacinta	Tacotalpa	Chiapas, Tabasco	504.223	Grijalva-Usumacinta	6 de Junio de 2018	1288.41	6 de Junio de 2018	1.344		527.507	2024.21	1.466	0	1.344	2.81	1.1	0	0	0	0	2550.01	2280.09	269.923	0.180321	Low	Yes							113.167		113.167	1	No	0	0	Yes	13	76.869	13.2631	244.874	335.006
658	3049	536	30	Grijalva-Usumacinta	Chilapilla	Tabasco	672.541	Grijalva-Usumacinta	6 de Junio de 2018	365.24	6 de Junio de 2018	5.824		654.847	0	1.135	0	5.824	6.959	0.87	0	0	0	0	648.759	580.087	68.672	1.60378	Low	Yes					36.451				36.451	1	Yes	36.4502	1	Yes	15	44.2256	74.5401	220.274	339.04
659	3050	543	30	Grijalva-Usumacinta	De La Sierra	Chiapas, Tabasco	1074.66	Grijalva-Usumacinta	6 de Junio de 2018	833.31	6 de Junio de 2018	3.918		1516.15	0	21.235	0	3.896	25.13	8.371	0	0	0	0	1499.39	1340.68	158.713	2.53321	Low	Yes							56.6544	5.90284	62.5573	1	No	0	0	Yes	32	277.32	12.0177	449.605	738.943
660	3051	546	30	Grijalva-Usumacinta	Pichucalco	Tabasco, Chiapas	1239.13	Grijalva-Usumacinta	6 de Junio de 2018	1015.81	6 de Junio de 2018	13.746		1791.96	0	4.247	0.088	13.64	17.975	2.382	0	0	0	0	1776.36	1588.33	188.031	1.49314	Low	Yes							5.5407		5.5407	1	No	0	0	Yes	25	209.401	49.5109	398.458	657.369
661	3052	542	30	Grijalva-Usumacinta	Viejo Mezcalapa	Tabasco, Chiapas	639.941	Grijalva-Usumacinta	6 de Junio de 2018	190.65	6 de Junio de 2018	10.356		477.696	0	2.239	0	10.356	12.595	0.712	0	0	0	0	465.813	416.506	49.307	5.24886	Low	No									0	0	No	0	0	Yes	10	68.388	1.07058	205.971	275.429
662	3053	604	30	Grijalva-Usumacinta	Azul	Chiapas	1387.85	Grijalva-Usumacinta	6 de Junio de 2018	630.38	6 de Junio de 2018	13.914		638.382	0	5.714	0.34	13.891	19.945	3.607	0	0	0	0	622.044	599.884	22.16	3.05652	Low	No									0	0	No	0	0	Yes	21	25.001	23.0571	459.145	507.203
663	3054	623	30	Grijalva-Usumacinta	Tzanconeja	Chiapas	2446.29	Grijalva-Usumacinta	6 de Junio de 2018	1108.76	6 de Junio de 2018	5.329		1113.08	0	7.161	0.009	5.224	12.394	4.472	0	0	0	0	1105.16	1065.79	39.371	1.07949	Low	Yes							42.6103		42.6103	1	No	0	0	Yes	24	71.8748	1.97699	531.465	605.316
664	3055	611	30	Grijalva-Usumacinta	Perlas	Chiapas	751.051	Grijalva-Usumacinta	6 de Junio de 2018	496.02	6 de Junio de 2018	1.563		498.691	0	0.305	0.278	1.563	2.146	0.437	0	0	0	0	496.982	479.277	17.705	0.417733	Low	Yes					190.371				190.371	1	No	0	0	Yes	9	12.69	37.5009	180.503	230.694
665	3056	662	30	Grijalva-Usumacinta	Comitán	Chiapas	785.795	Grijalva-Usumacinta	6 de Junio de 2018	280	6 de Junio de 2018	13.897		304.805	0	12.728	0.627	13.867	27.222	3.483	0	0	0	0	281.066	280	1.066	9.68527	Low	Yes				37.1636					37.1636	1	Yes	38.2631	1	Yes	8	31.7734	24.5496	170.04	226.363
666	3057	652	30	Grijalva-Usumacinta	Margaritas	Chiapas	637.954	Grijalva-Usumacinta	6 de Junio de 2018	269.99	6 de Junio de 2018	3.815		283.652	0	9.415	0.143	3.815	13.372	2.518	0	0	0	0	272.797	269.99	2.807	4.90181	Low	No									0	0	No	0	0	Yes	6	45.5873	0.451269	98.035	144.074
667	3058	597	30	Grijalva-Usumacinta	Jatate	Chiapas	1582.29	Grijalva-Usumacinta	6 de Junio de 2018	3182.87	6 de Junio de 2018	4.157		955.364	2224.18	131.112	0.124	0	131.236	98.199	0	0	0	0	3146.51	3029.74	116.769	3.97728	Low	Yes	0.984794				79.8792				80.864	1	Yes	0.988143	1	Yes	23	25.001	81.3183	473.337	579.656
996	3059	674	30	Grijalva-Usumacinta	Ixcán	Chiapas	15.4047	Grijalva-Usumacinta	6 de Junio de 2018	3967.08	6 de Junio de 2018	0.027		14.818	3973.16	0.008	0	0.027	0.035	0.006	0	0	0	0	3987.95	3839.96	147.995	0.000850531	Low	No									0	0	No	0	0	No					0
669	3060	673	30	Grijalva-Usumacinta	Chajul	Chiapas	15.6487	Grijalva-Usumacinta	6 de Junio de 2018	1925.56				14.594	1921.05	0	0	0	0	0	0	0	0	0	1935.65	1863.81	71.833	0	Low	No									0	0	No	0	0	Yes	0	3.80234	0	7.11493	10.9173
670	3061	590	30	Grijalva-Usumacinta	Lacanjá	Chiapas	2023.36	Grijalva-Usumacinta	6 de Junio de 2018	1282.91	6 de Junio de 2018	3.239		1289.9	0	1.126	0.041	3.195	4.362	0.875	0	0	0	0	1286.41	1238.67	47.739	0.32781	Low	Yes	68.2191		42.4544		895.264				1005.94	1	Yes	68.1917	1	Yes	31	233.419	245.076	286.715	765.209
671	3062	628	30	Grijalva-Usumacinta	San Pedro	Chiapas	1475.64	Grijalva-Usumacinta	6 de Junio de 2018	1178.86	6 de Junio de 2018	0.027		1183.65	0	0.02	0.408	0.027	0.455	0.096	0	0	0	0	1183.29	1139.38	43.913	0.0372105	Low	Yes					1474.71				1474.71	1	No	0	0	Yes	28	201.472	352.873	158.451	712.795
672	3063	646	30	Grijalva-Usumacinta	Laguna Miramar	Chiapas	386.064	Grijalva-Usumacinta	6 de Junio de 2018	325.13	6 de Junio de 2018	0.216		326.334	0	0.386	0	0.157	0.544	0.196	0	0	0	0	325.987	313.889	12.098	0.161315	Low	Yes					386.064				386.064	1	No	0	0	Yes	4	1.21863	10.7396	60.5241	72.4824
673	3064	643	30	Grijalva-Usumacinta	Euseba	Chiapas	447.463	Grijalva-Usumacinta	6 de Junio de 2018	400.47	6 de Junio de 2018	0.436		400.786	0	0.22	0	0.436	0.656	0.165	0	0	0	0	400.295	385.44	14.855	0.157949	Low	Yes								6.61413	6.61413	1	No	0	0	Yes	7	0	22.3893	152.357	174.747
674	3065	647	30	Grijalva-Usumacinta	Caliente	Chiapas	262.94	Grijalva-Usumacinta	6 de Junio de 2018	284.52	6 de Junio de 2018	0.312		283.364	0	0.265	0	0.312	0.577	0.199	0	0	0	0	282.986	272.484	10.502	0.195579	Low	Yes								1.30795	1.30795	1	No	0	0	Yes	3	0	0	66.6947	66.6947
675	3066	656	30	Grijalva-Usumacinta	Seco	Chiapas	426.154	Grijalva-Usumacinta	6 de Junio de 2018	516.87	6 de Junio de 2018	0.037		513.974	0	1.408	0	0.037	1.445	1.056	0	0	0	0	513.585	494.526	19.059	0.269625	Low	Yes								2.97615	2.97615	1	No	0	0	Yes	1	0	0	31.2576	31.2576
676	3067	654	30	Grijalva-Usumacinta	Santo Domingo	Chiapas	604.101	Grijalva-Usumacinta	6 de Junio de 2018	409.78	6 de Junio de 2018	2.156		412.866	0	1.963	0.005	2.15	4.117	1.091	0	0	0	0	409.839	394.63	15.209	0.968731	Low	Yes				3.11823					3.11823	1	Yes	3.63784	1	Yes	10	38.8892	0	191.724	230.613
677	3068	627	30	Grijalva-Usumacinta	Lacantún	Chiapas	2601.42	Grijalva-Usumacinta	6 de Junio de 2018	16195				2023.77	14183.2	5.336	0.284	0	5.62	2.812	0	0	0	0	16204.2	15602.6	601.553	0.0334591	Low	Yes				23.3688	803.392			27.1331	853.894	1	Yes	22.1373	1	Yes	59	327.851	438.861	690.221	1456.93
678	3069	538	30	Grijalva-Usumacinta	San Pedro	Tabasco, Campeche	2111.13	Grijalva-Usumacinta	6 de Junio de 2018	2827.87	6 de Junio de 2018	0.317		1179.78	1967.78	4.39	0	0.317	4.707	1.157	0	0	0	0	3144.01	3027.29	116.716	0.159853	Low	Yes	54.9424						56.0292		110.972	1	No	0	0	Yes	17	0	72.9602	335.418	408.378
679	3070	633	30	Grijalva-Usumacinta	Chixoy	Chiapas	1117.51	Grijalva-Usumacinta	6 de Junio de 2018	29021.4	6 de Junio de 2018	1.505		731.118	28444.1	2.872	0	1.505	4.377	0.617	0	0	0	0	29171.5	28088.5	1082.94	0.0145394	Low	No									0	0	No	0	0	Yes	14	70.3701	89.2225	230.644	390.237
680	3071	572	30	Grijalva-Usumacinta	Chocaljah	Chiapas	971.95	Grijalva-Usumacinta	6 de Junio de 2018	583.23	6 de Junio de 2018	2.111		647.49	0	1.809	0.023	2.111	3.943	1.37	0	0	0	0	644.917	620.975	23.941	0.649405	Low	Yes	3.09913				13.0047				16.1038	1	Yes	3.10474	1	Yes	13	18.0216	0.0145253	296.814	314.85
681	3072	558	30	Grijalva-Usumacinta	Chacamax	Tabasco, Chiapas	1375.03	Grijalva-Usumacinta	6 de Junio de 2018	1069.55	6 de Junio de 2018	9.791		1183.23	0	6.567	0	9.791	16.358	1.617	0	0	0	0	1168.49	1125.11	43.378	1.46982	Low	Yes							54.314		54.314	1	Yes	54.3163	1	Yes	36	146.792	49.1846	645.506	841.483
682	3073	514	30	Grijalva-Usumacinta	Usumacinta	Tabasco, Campeche, Chiapas	6820.24	Grijalva-Usumacinta	6 de Junio de 2018	53070.4	6 de Junio de 2018	4.081		5246.93	53552.4	129.38	0.059	4.081	133.52	31.321	0	0	0	0	58697.1	56513.1	2183.99	0.241646	Low	Yes	538.235		26.508		603.204		407.739	3.4094	1579.1	1	Yes	963.693	1	Yes	104	506.921	409.191	1748.99	2665.1
683	3074	511	30	Grijalva-Usumacinta	Grijalva	Tabasco	1830.25	Grijalva-Usumacinta	6 de Junio de 2018	45498.8				1855.7	49054	61.865	0.208	0	62.073	44.774	0	0	0	0	50892.4	45498.8	5393.62	0.121969	Low	Yes					659.137		21.9254		681.062	1	Yes	659.122	1	Yes	43	439.235	241.78	390.246	1071.26
684	3075	516	30	Grijalva-Usumacinta	Palizada	Campeche, Tabasco	1269.44	Grijalva-Usumacinta	6 de Junio de 2018	18552	6 de Junio de 2018	0.605		943.663	19565.7	0.445	0	0.605	1.05	0.097	0	0	0	0	20508.4	20459	49.407	0.00564473	Low	Yes	698.794				17.5292				716.323	1	Yes	716.201	1	Yes	27	218.176	206.038	253.886	678.1
685	3076	510	30	Grijalva-Usumacinta	San Pedro y San Pablo	Campeche, Tabasco	781.625	Grijalva-Usumacinta	6 de Junio de 2018	20599.7	6 de Junio de 2018	0.261		1103.8	19565.7	0.078	0	0.261	0.339	0.056	0	0	0	0	20669.2	20599.7	69.506	0.00164012	Low	Yes	127.006				637.313				764.319	1	Yes	764.161	1	Yes	23	343.135	96.0298	117.89	557.055
686	3077	513	30	Grijalva-Usumacinta	Laguna del Este	Campeche	1001.41	Grijalva-Usumacinta	6 de Junio de 2018	1508.26	6 de Junio de 2018	0.077		589.906	20508.4	57.941	0	0.077	58.018	11.588	0	0	0	0	21051.9	21001	50.856	3.72121	Low	Yes	374.162							4.71698	378.879	1	Yes	374.154	1	Yes	27	180.227	138.825	302.01	621.061
687	3078	485	30	Grijalva-Usumacinta	Laguna de Términos	Campeche, Tabasco	2898.29	Grijalva-Usumacinta	6 de Junio de 2018	1508.26	6 de Junio de 2018	13.227		1715.61	0	0.008	0	13.227	13.235	0.001	0	0	0	0	1702.38	1508.26	194.115	0.777443	Low	Yes	910.08				5.84e-06			24.1494	934.229	1	Yes	910.448	1	Yes	29	394.374	76.2873	211.062	681.723
688	3079	501	30	Grijalva-Usumacinta	Mamatel	Campeche	1155.56	Grijalva-Usumacinta	6 de Junio de 2018	603.44				695.641	0	4.475	0	0	4.475	1.373	0	0	0	0	692.539	603.441	89.098	0.646174	Low	Yes	19.4777							7.07203	26.5497	1	Yes	19.47	1	Yes	6	36.6064	0	116.318	152.925
689	3080	505	30	Grijalva-Usumacinta	Cumpan	Tabasco, Campeche	3005.34	Grijalva-Usumacinta	6 de Junio de 2018	1523.9	6 de Junio de 2018	0.503		1676.76	0	1.25	0	0.503	1.753	0.323	0	0	0	0	1675.33	1523.9	151.43	0.104636	Low	Yes	284.028							2.61978	286.648	1	Yes	284.045	1	Yes	46	167.838	255.328	670.458	1093.62
690	3081	506	30	Grijalva-Usumacinta	Laguna del Pom y Atasta	Campeche, Tabasco	1196.1	Grijalva-Usumacinta	6 de Junio de 2018	1109.51	6 de Junio de 2018	0.88		1240.39	0	0.095	0	0.88	0.975	0.079	0	0	0	0	1239.5	1109.51	129.988	0.0786609	Low	Yes	869.882				307.042				1176.92	1	Yes	1176.3	1	Yes	41	915.364	80.6714	65.9079	1061.94
608	3082	503	30	Grijalva-Usumacinta	Alto Río Candelaria	Tabasco, Campeche	9651.6							1441.54	260.59	2.296	0	0	2.296	0	0	0	0	0	1699.38	221.785	1477.6	0.155387	Low	Yes					2640.58		1854.88		4495.46	1	No	0	0	Yes	105	325.013	443.602	1834.99	2603.6
609	3083	504	30	Grijalva-Usumacinta	Bajo Río Candelaria	Campeche	1474.81							239.27	1699.38	209.929	0.893	0	210.822	0	0	0	0	0	1685.64	0	1685.64	12.5069	Medium	Yes	20.1841						15.7747		35.9588	1	Yes	20.1777	1	Yes	22	85.3673	108.642	385.881	579.89
691	3101	734	31	Yucatán Oeste	Río Champotón 1	Campeche	256.647							602.013	0	2.089	0	0	2.089	0	0	0	0	0	599.924	0.465	599.46	0.34848	Low	No									0	0	No	0	0	Yes	3	0	24.9699	50.7951	75.765
692	3102	733	31	Yucatán Oeste	Río Champotón 2	Campeche	407.517							116.197	599.924	0.554	0	0	0.554	0	0	0	0	0	715.567	0	715.567	0.0774211	Low	No									0	0	No	0	0	Yes	8	53.3931	49.2963	118.649	221.338
693	3103	436	31	Yucatán Oeste	Campeche	Yucatán	733.924							0	0	0	0	0	0	0	0	0	0	0	0	0	0	0	Very high	Yes					0.143361				0.143361	1	Yes	0.146586	1	Yes	14	76.0652	75.0027	217.256	368.324
694	3104	457	31	Yucatán Oeste	Arroyo Siho	Yucatán	628.755							5.306	0	0.002	0	0	0.002	0	0	0	0	0	5.304	0	5.304	0.0377074	Low	No									0	0	No	0	0	Yes	7	14.0179	0.707177	106.931	121.657
695	3105	424	31	Yucatán Oeste	Calakmul	Yucatán	15242.5							3.814	0	0.004	0	0	0.004	0	0	0	0	0	3.81	0	3.81	0.104987	Low	Yes					2520.02		3117.3	211.162	5848.48	1	No	0	0	Yes	131	148.457	647.8	2532.21	3328.47
696	3106	474	31	Yucatán Oeste	Vicente Guerrero	Yucatán	672.731							0	0	0	0	0	0	0	0	0	0	0	0	0	0	0	Very high	No									0	0	No	0	0	Yes	4	0	25.0301	72.4586	97.4887
697	3107	476	31	Yucatán Oeste	La Malinche	Yucatán	3590.58							7.554	0	0.001	0	0	0.001	0	0	0	0	0	7.553	0	7.553	0.0132398	Low	Yes							95.1761	79.0032	174.179	1	Yes	0.654383	1	Yes	14	75.0028	68.8114	192.281	336.095
698	3201	322	32	Yucatán Norte	Yucatán	Campeche, Yucatán, Quintana Roo	54847.6							0.259	0	0.015	0	0	0.015	0	0	0	0	0	0.244	0	0.244	6.14754	Low	Yes	562.784			13.3653	2274.59	3.83195	4864.47	51.1396	7770.19	1	Yes	3476.05	1	Yes	295	3773.47	877.206	2471.23	7121.9
699	3202	436	32	Yucatán Norte	Río Verde	Campeche	433.57							22.079	0	0	0	0	0	0	0	0	0	0	22.079	0	22.079	0	Low	Yes					154.412				154.412	1	Yes	154.558	1	Yes	8	88.7408	44.1919	53.8401	186.773
700	3301	488	33	Yucatán Este	Río Escondido	Campeche, Quintana Roo	4522.51							612.007	0	0.469	0	0	0.469	0	0	0	0	0	611.538	0	611.538	0.0766919	Low	Yes					539.951		3.9269	105.707	649.585	1	No	0	0	Yes	61	154.315	312.991	1035.16	1502.47
701	3302	499	33	Yucatán Este	Agua Dulce	Quintana Roo	654.309							96.497	0	0.001	0	0	0.001	0	0	0	0	0	96.496	0	96.496	0.00103631	Low	No									0	0	No	0	0	Yes	5	32.0306	0	59.1053	91.1359
702	3303	499	33	Yucatán Este	Arroyo Azul	Canpeche, Quintana Roo	2558.08							282.746	0	0.01	0	0	0.01	0	0	0	0	0	282.736	0	282.736	0.00353687	Low	Yes					301.938			141.351	443.289	1	No	0	0	Yes	44	187.017	154.265	729.146	1070.43
703	3304	460	33	Yucatán Este	Laguna Bacalar	Quintana Roo	5192.3							76.203	0	0.422	0	0	0.422	0	0	0	0	0	75.781	0	75.781	0.556868	Low	Yes							208.11	47.8511	255.961	1	No	0	0	Yes	36	236.877	164.232	527.841	928.95
704	3305	488	33	Yucatán Este	Chichancanab	Campeche, Yucatán, Quintana Roo	24843.6							35.12	0	0.132	0	0	0.132	0	0	0	0	0	34.988	0	34.988	0.377272	Low	Yes	2163.54			45.3234	4120.23		1559.9	789.391	8678.38	1	Yes	5283.72	1	Yes	281	1853.61	1830.96	3327.88	7012.45
705	3306	322	33	Yucatán Este	Chunyaxche	Quintana Roo	1515.77							21.559	0	0	0	0	0	0	0	0	0	0	21.559	0	21.559	0	Low	Yes					727.08				727.08	1	Yes	727.092	1	Yes	18	199.753	94.6836	209.438	503.874
706	3401	735	34	Cuencas Centrales del Norte	Río Casas Grandes 1	Sonora, Chihuahua	5239.05							87.62	0	44.851	2.05	0	46.901	4.592	0	0	0	0	45.311	18.788	26.523	176.831	Very high	Yes					230.189			19.0055	249.194	1	No	0	0	Yes	46	128.507	394.209	630.864	1153.58
707	3402	25	34	Cuencas Centrales del Norte	Río Casas Grandes 2	Chihuahua	13061.7							151.591	45.311	81.117	0.529	0	81.646	0	0	0	0	0	115.256	0	115.256	70.8388	High	Yes					3619.71			8.12317	3627.83	1	No	0	0	Yes	41	181.98	123.869	733.954	1039.8
708	3403	34	34	Cuencas Centrales del Norte	Hacienda San Francisco-Juguete-Madero-Palomas	Sonora, Chihuahua	5337.07							68.684	0	0.008	0	0	0.008	0	0	0	0	0	68.675	0	68.675	0.0116491	Low	Yes					1133.42			57.333	1190.75	1	No	0	0	Yes	36	0	323.208	526.802	850.01
709	3404	68	34	Cuencas Centrales del Norte	Laguna de Babicora	Chihuahua	1921.38							54.75	0	0.282	0	0	0.282	0	0	0	0	0	54.468	0	54.468	0.517735	Low	No									0	0	Yes	260.057	1	Yes	11	250.004	0	18.0413	268.046
710	3405	738	34	Cuencas Centrales del Norte	Río Santa María 1	Chihuahua	3870.44							72.945	0	78.357	0.381	0	78.738	7.84	0	0	10.292	-0.202	-8.043	0	-8.043	0	Very high	No									0	0	No	0	0	Yes	19	66.6615	25.0004	377.853	469.515
711	3406	37	34	Cuencas Centrales del Norte	Río Santa María 2	Chihuahua	5638.36							71.886	0	16.925	0	0	16.925	0	0	0	0	0	54.961	0	54.961	30.7946	Medium	No									0	0	No	0	0	Yes	42	183.342	280.801	607.023	1071.17
712	3407	36	34	Cuencas Centrales del Norte	Laguna El Sabinal	Chihuahua	1885.57							25.459	0	19.974	0	0	19.974	0	0	0	0	0	5.485	0	5.485	364.157	Very high	No									0	0	No	0	0	Yes	7	8.28681	0	193.992	202.279
713	3408	22	34	Cuencas Centrales del Norte	Desierto de Samalayuca	Chihuahua	8357.77							129.176	0	0.005	0	0	0.005	0	0	0	0	0	129.171	0	129.171	0.00387084	Low	Yes	165.104								165.104	1	No	0	0	Yes	33	53.4483	100.002	652.386	805.836
714	3409	737	34	Cuencas Centrales del Norte	Laguna La Vieja	Chihuahua	1837.88							34.68	0	0.335	0	0	0.335	0	0	0	0	0	34.345	0	34.345	0.975397	Low	No									0	0	No	0	0	Yes	9	0	25.0004	190.173	215.174
715	3410	736	34	Cuencas Centrales del Norte	Río del Carmen 1	Chihuahua	4568.98							77.896	0	61.903	2.986	0	64.889	6.481	0	0	6.157	0.72	12.611	0.003	12.608	569.21	Very high	No									0	0	No	0	0	Yes	14	125.002	130.003	100.002	355.007
716	3411	32	34	Cuencas Centrales del Norte	Río del Carmen 2	Chihuahua	8749.73							104.31	12.611	0.027	0	0	0.027	0	0	0	0	0	116.894	0	116.894	0.0230978	Low	No									0	0	No	0	0	Yes	13	50.0008	19.9995	265.51	335.511
717	3412	44	34	Cuencas Centrales del Norte	Rancho El Cuarenta	Chihuahua	1023.08							16.331	0	0	0	0	0	0	0	0	0	0	16.331	0	16.331	0	Low	No									0	0	No	0	0	Yes	3	0	0	70.2316	70.2316
718	3413	740	34	Cuencas Centrales del Norte	Arroyo Roma	Chihuahua	1782.83							29.626	0	0	0	0	0	0	0	0	0	0	29.626	0	29.626	0	Low	Yes	379.194								379.194	1	No	0	0	Yes	8	0	0	204.409	204.409
991	3414	48	34	Cuencas Centrales del Norte	Félix U. Gómez	Chihuahua	2893.27							32.406	0	0	0	0	0	0	0	0	0	0	32.406	0	32.406	0	Low	No									0	0	No	0	0	No					0
720	3415	50	34	Cuencas Centrales del Norte	Arroyo El Carrizo	Chihuahua	3708.84							41.386	0	0.282	0	0	0.282	0	0	0	0	0	41.104	0	41.104	0.686065	Low	No									0	0	No	0	0	Yes	8	0	0	200.003	200.003
721	3416	54	34	Cuencas Centrales del Norte	Arroyo El Burro	Chihuahua	4402.82							56.013	0	0	0	0	0	0	0	0	0	0	56.013	0	56.013	0	Low	No									0	0	No	0	0	Yes	17	0	50.0008	362.966	412.966
722	3417	57	34	Cuencas Centrales del Norte	Laguna de Tarabillas	Chihuahua	1863.45							26.991	0	0.001	0	0	0.001	0	0	0	0	0	26.99	0	26.99	0.00370508	Low	No									0	0	No	0	0	Yes	6	0	0	141.745	141.745
723	3418	64	34	Cuencas Centrales del Norte	Laguna El Cuervo	Chihuahua	6233.89							95.944	0	0.572	1.192	0	1.764	0	0	0	0	0	94.18	0	94.18	1.87301	Low	No									0	0	No	0	0	Yes	31	110.275	225.004	446.514	781.793
724	3419	70	34	Cuencas Centrales del Norte	Laguna de Encinillas	Chihuahua	2883.3							51.996	0	0.253	0	0	0.253	0	0	0	0	0	51.744	0	51.744	0.488946	Low	No									0	0	No	0	0	Yes	18	150.003	100.002	200.003	450.008
992	3420	76	34	Cuencas Centrales del Norte	Rancho Hormigas-El Diablo	Chihuahua	196.536							4.776	0	0	0	0	0	0	0	0	0	0	4.776	0	4.776	0	Low	No									0	0	No	0	0	No					0
726	3421	88	34	Cuencas Centrales del Norte	Laguna de Bustillos	Chihuahua	3227.26							77.719	0	45.791	10.86	0	56.651	5.623	0	0	0	0	26.691	0	26.691	212.248	Very high	No									0	0	No	0	0	Yes	18	125.009	0	315.137	440.147
727	3422	739	34	Cuencas Centrales del Norte	Laguna Los Mexicanos	Chihuahua	767.618							26.242	0	2.324	0.272	0	2.596	0.224	0	0	0	0	23.87	0	23.87	10.8756	Medium	No									0	0	No	0	0	Yes	1	0	0	21.826	21.826
728	3501	138	35	Mapimí	Valle Hundido	Coahuila de Zaragoza	7892.68							13.465	0	0.002	0	0	0.002	0	0	0	0	0	13.463	9.424	4.039	0.0495172	Low	Yes		539.139							539.139	1	No	0	0	Yes	11	48.4897	0	213.262	261.751
729	3502	123	35	Mapimí	Laguna del Rey	Coahuila de Zaragoza, Chihuahua, Durango	16050.4							55.614	0	0.064	0	0	0.064	0	0	0	0	0	55.55	38.885	16.665	0.384038	Low	Yes		3.32606			2175.1				2178.43	1	No	0	0	Yes	81	150.003	370.832	1508.95	2029.79
730	3503	104	35	Mapimí	Laguna del Guaje-Lipanés	Chihuahua, Coahuila de Zaragoza	7289.32							23.436	0	0.041	0	0	0.041	0	0	0	0	0	23.396	16.377	7.019	0.584129	Low	No									0	0	No	0	0	Yes	62	0	300.006	1220.01	1520.01
731	3504	82	35	Mapimí	Polvorillos- Arroyo El Marquez	Chihuahua, Coahuila de Zaragoza	12355.6							42.6	0	0.551	0	0	0.551	0	0	0	0	0	42.048	29.434	12.614	4.36816	Low	No									0	0	No	0	0	Yes	80	25.0005	250.005	1747.07	2022.08
732	3505	102	35	Mapimí	El Llano-Laguna del Milagro	Chihuahua, Coahuila de Zaragoza	10342							44.601	0	0.554	0	0	0.554	0	0	0	0	0	44.046	30.832	13.214	4.19252	Low	No									0	0	No	0	0	Yes	67	75.0015	200.004	1377.67	1652.68
733	3506	126	35	Mapimí	Arroyo La India-Laguna Palomas	Chihuahua, Durango	10978.9							45.253	0	34.684	0	0	34.684	0	0	0	0	0	10.569	7.398	3.171	1093.79	Very high	Yes					181.778				181.778	1	No	0	0	Yes	106	85.4037	313.74	2218.08	2617.22
734	3601	147	36	Nazas-Aguanaval	Río Sextín	Durango	4884.51							501.523	0	4.979	0	0	4.979	0.053	0	0	0	0	496.596	493.391	3.205	155.351	Very high	No									0	0	No	0	0	Yes	116	129.651	2008.8	785.327	2923.78
735	3602	166	36	Nazas-Aguanaval	Río Ramos	Durango	6740.97							566.006	0	12.293	0	0	12.293	1.607	0	0	0	0	555.32	551.736	3.584	342.997	Very high	No									0	0	No	0	0	Yes	171	643.355	2090.61	1490.46	4224.43
736	3603	159	36	Nazas-Aguanaval	Presa Lázaro Cárdenas	Durango	6538.74							197.025	1051.92	5.364	0	0	5.364	0.498	0	94.168	125.345	26.381	998.182	990.117	8.065	3115.41	Very high	No									0	0	No	0	0	Yes	117	295.055	1321.65	1345.45	2962.16
737	3604	167	36	Nazas-Aguanaval	Agustín Melgar	Durango	11467.7							120.078	998.182	87.456	0	0	87.456	1.984	0	0	0	0	1032.79	1023.74	9.051	966.258	Very high	No									0	0	No	0	0	Yes	76	220.275	244.706	1332.72	1797.7
738	3605	174	36	Nazas-Aguanaval	Presa Francisco Zarco	Durango	3450.64							66.024	1032.79	8.42	0	0	8.42	0.951	0	80.947	40.408	0.961	969.027	959.389	9.638	1356.46	Very high	Yes							0.00878112		0.00878112	1	Yes	0.0368453	1	Yes	22	0	70.1968	471.938	542.135
739	3606	171	36	Nazas-Aguanaval	Los Ángeles	Durango	1344.2							1.05	969.027	71.225	0	0	71.225	0.848	0	0	0	0	899.7	890.043	9.657	737.548	Very high	Yes							152.982		152.982	1	Yes	161.132	1	Yes	5	25.0006	4.80515	111.888	141.694
740	3607	143	36	Nazas-Aguanaval	Canal Santa Rosa	Durango, Coahuila de Zaragoza	9085.51							3.042	899.7	844.781	73.344	0	918.125	27.503	0	0	0	0	12.12	2.135	9.985	9195.04	Very high	Yes					940.805				940.805	1	No	0	0	Yes	25	25.0006	21.3998	606.152	652.552
741	3608	149	36	Nazas-Aguanaval	Arroyo Cadena	Durango	3239.57							4.695	0	0.005	0	0	0.005	0	0	0	0	0	4.69	0	4.69	0.10661	Low	Yes					100.289				100.289	1	No	0	0	Yes	20	25.0006	22.9086	409.262	457.172
742	3609	157	36	Nazas-Aguanaval	Laguna de Mayrán	Coahuila de Zaragoza	10652.2							0.571	12.12	2.287	0	0	2.287	0.291	0	0	0	0	10.695	0	10.695	21.3838	Medium	No									0	0	No	0	0	Yes	13	50.0012	0	260.839	310.841
743	3610	297	36	Nazas-Aguanaval	Presa Santa Rosa	Zacatecas	225.444							10.473	0	0.115	0	0	0.115	0.086	0	0	4.086	-0.086	6.444	4.649	1.795	229.248	Very high	Yes		1.6333							1.6333	1	No	0	0	Yes	4	0	35.1843	69.3393	104.524
744	3611	267	36	Nazas-Aguanaval	Presa Leobardo Reynoso	Zacatecas	1409.98							40.968	0	0.078	0	0	0.078	0	0	0	8.856	1.286	30.748	22.184	8.564	119.337	Very high	No									0	0	No	0	0	Yes	37	174.667	531.619	252.676	958.962
745	3612	248	36	Nazas-Aguanaval	Presa Cazadero	Zacatecas	3314.69							75.765	37.191	41.33	0.002	0	41.332	3.247	0	0	5.945	-0.099	69.026	36.662	32.364	145.773	Very high	No									0	0	No	0	0	Yes	69	71.0074	599.785	1056.72	1727.51
746	3613	226	36	Nazas-Aguanaval	San Francisco	Zacatecas	5203.67							81.836	69.026	34.003	0	0	34.003	2.72	0	0	0	0	119.58	47.57	72.009	47.2205	High	No									0	0	No	0	0	Yes	38	25.0007	297.876	613.127	936.003
747	3614	187	36	Nazas-Aguanaval	Presa La Flor	Zacatecas, Durango, Coahuila de Zaragoza	9525.06							53.136	119.58	29.823	0	0	29.823	3.092	0	0	0	0	145.985	40.116	105.869	28.1697	Medium	Yes							408.702		408.702	1	No	0	0	Yes	61	0	466.237	1081.42	1547.66
748	3615	175	36	Nazas-Aguanaval	Nazareno	Durango, Coahuila de Zaragoza	3360.22							1.718	145.985	40.231	0	0	40.231	0	0	0	0	0	107.472	0.357	107.115	37.5587	Medium	Yes							432.241		432.241	1	Yes	15.5633	1	Yes	10	0	0	243.627	243.627
749	3616	176	36	Nazas-Aguanaval	Laguna de Viesca	Zacatecas, Durango, Coahuila de Zaragoza	9628.99							38.274	107.472	0.472	0.012	0	0.484	0	0	0	0	0	145.262	0	145.262	0.333191	Low	Yes							182.575		182.575	1	No	0	0	Yes	5	0	0	125.199	125.199
750	3701	179	37	El Salado	Sierra Madre Oriental	Coahuila de Zaragoza, San Luis Potosí, Nuevo León	9867.02							24.473	0	0.016	0	0	0.016	0	0	0	0	0	24.457	18.343	6.114	0.261694	Low	Yes		1.27557					244.728	79.2435	325.247	1	No	0	0	Yes	59	367.298	148.171	990.364	1505.83
751	3702	207	37	El Salado	Matehuala	San Luis Potosí, Zacatecas, Nuevo León	10389.6							25.868	0	5.615	0	0	5.615	0	0	0	0	0	20.253	15.189	5.063	110.903	Very high	Yes	92.7872						1387.63		1480.41	1	No	0	0	Yes	183	701.717	2636	1243.01	4580.73
752	3703	191	37	El Salado	Sierra de Rodríguez	San Luis Potosí, Zacatecas, Nuevo León	8164.47							19.498	0	0.286	0	0	0.286	0.069	0	0	0	0	19.281	14.46	4.82	5.93361	Low	Yes							16.4696		16.4696	1	No	0	0	Yes	36	103.379	241.137	585.377	929.893
753	3704	200	37	El Salado	Camacho-Gruñidora	Zacatecas, Durango, Coahuila de Zaragoza	9162.42							18.671	0	1.665	0	0	1.665	0	0	0	0	0	17.006	12.754	4.251	39.1673	Medium	No									0	0	No	0	0	Yes	20	0	25.0007	472.709	497.71
754	3705	231	37	El Salado	Fresnillo - Yescas	Zacatecas, San Luis Potosí	14380.9							34.658	0	24.234	0.914	0	25.148	7.733	0	0	0	0	17.243	12.932	4.311	583.345	Very high	Yes							38.3507		38.3507	1	Yes	16.1848	1	Yes	160	107.009	991.934	2803.79	3902.73
755	3706	259	37	El Salado	Presa San Pablo y otras	San Luis Potosí, Aguascalientes, Zacatecas, Jalisco	12699.3							30.738	0	14.502	0.588	0	15.09	0	0	0	0	0	15.648	11.736	3.912	385.736	Very high	Yes	130.361						126.997		257.358	1	No	0	0	Yes	188	609.828	1089.6	2980.34	4679.77
756	3707	275	37	El Salado	Presa San José - Los Pilares y otras	San Luis Potosí, Nuevo León, Zacatecas	11267.7							32.47	0	38.161	0.001	0	38.163	0	31.536	0	0	0	25.843	19.382	6.461	590.667	Very high	Yes	500.673						919.47		1420.14	1	No	0	0	Yes	176	428.943	301.331	3644.99	4375.26
757	3708	244	37	El Salado	Sierra Madre	San Luis Potosí, Tamaulipas, Nuevo León	11519.9							32.403	0	8.498	0	0	8.498	0	0	0	0	0	23.905	17.929	5.976	142.202	Very high	Yes							1101.46	4.3531	1105.81	1	No	0	0	Yes	229	378.63	2391.31	2812.24	5582.18
[truncated: 7 more columns]
